# Supplementary material for: Comparative RNA-Seq analysis unfolds a complex regulatory network imparting yellow mosaic disease resistance in mungbean [Vigna radiata (L.) R. Wilczek]
Source: PLoS One. 2021 Jan 12;16(1):e0244593. doi: 10.1371/journal.pone.0244593 (PMC7802970; doi:10.1371/journal.pone.0244593)
Supplement: S4 Table — (XLSX) [file pone.0244593.s012.xlsx]

## Sheet: MRI_MSC
S4 Table. Details of the DEGs obtained from the MRI vs MSc sample comparision.
StringTieID	Sample A	Sample B	logFC	logCPM	pvalue	FDR	Reg	Sig	Protein		Annotated Ortholog	Gene	GO	KEGG	COG	Function
MSTRG.32083	MR_inoculated	MS_control	9.56674	10.2302	1.29601e-23	2.34799e-19	Up	Yes	XP_014491873.1		3847.GLYMA10G39740.1	THI1	GO:0003674,GO:0005488,GO:0005575,GO:0005622,GO:0005623,GO:0005737,GO:0005739,GO:0006725,GO:0006766,GO:0006767,GO:0006772,GO:0006790,GO:0006807,GO:0006950,GO:0006974,GO:0008150,GO:0008152,GO:0008270,GO:0009058,GO:0009110,GO:0009228,GO:0009266,GO:0009409,GO:0009507,GO:0009526,GO:0009532,GO:0009536,GO:0009570,GO:0009579,GO:0009628,GO:0009941,GO:0009987,GO:0010319,GO:0018130,GO:0018131,GO:0019438,GO:…	K03146	H	Involved in biosynthesis of the thiamine precursor thiazole. Catalyzes the conversion of NAD and glycine to adenosine diphosphate 5-(2-hydroxyethyl)-4-methylthiazole-2-carboxylic acid (ADT), an adenylated thiazole intermediate. The reaction includes an iron-dependent sulfide transfer from a conserved cysteine residue of the protein to a thiazole intermediate. The enzyme can only undergo a single …
MSTRG.17720	MR_inoculated	MS_control	-9.66152	9.23735	2.79485e-23	2.53172e-19	Down	Yes	XP_014507220.1		3847.GLYMA08G01300.1				K	sugar transporter
MSTRG.26837	MR_inoculated	MS_control	-8.43405	10.5546	1.28603e-20	7.76636e-17	Down	Yes	XP_022631790.1		3847.GLYMA07G05410.4			K12133	K	Myb transcription factor
MSTRG.3045	MR_inoculated	MS_control	-8.10097	7.94194	8.61735e-19	3.90301e-15	Down	Yes	XP_014493893.1		3847.GLYMA12G04890.1	PMT5	GO:0003674,GO:0005215,GO:0005351,GO:0005354,GO:0005355,GO:0005365,GO:0005402,GO:0005575,GO:0005623,GO:0005886,GO:0006810,GO:0006811,GO:0006812,GO:0006818,GO:0008150,GO:0008324,GO:0008643,GO:0008645,GO:0009987,GO:0015075,GO:0015144,GO:0015145,GO:0015146,GO:0015148,GO:0015149,GO:0015166,GO:0015168,GO:0015291,GO:0015293,GO:0015294,GO:0015295,GO:0015575,GO:0015576,GO:0015591,GO:0015665,GO:0015672,GO:…		G	Transporter
MSTRG.9659	MR_inoculated	MS_control	-8.14823	7.28549	2.17016e-18	7.86335e-15	Down	Yes	XP_014498632.1		3847.GLYMA04G01550.1	PMT5	GO:0003674,GO:0005215,GO:0005351,GO:0005354,GO:0005355,GO:0005365,GO:0005402,GO:0005575,GO:0005623,GO:0005886,GO:0006810,GO:0006811,GO:0006812,GO:0006818,GO:0008150,GO:0008324,GO:0008643,GO:0008645,GO:0009987,GO:0015075,GO:0015144,GO:0015145,GO:0015146,GO:0015148,GO:0015149,GO:0015166,GO:0015168,GO:0015291,GO:0015293,GO:0015294,GO:0015295,GO:0015575,GO:0015576,GO:0015591,GO:0015665,GO:0015672,GO:…		G	Transporter
MSTRG.23411	MR_inoculated	MS_control	7.40549	11.1473	1.02336e-17	3.09005e-14	Up	Yes	XP_014518016.1		3847.GLYMA08G45150.4				S	expressed protein
MSTRG.25836	MR_inoculated	MS_control	7.72501	7.30805	1.704e-17	4.4102e-14	Up	Yes	XP_014520490.1		3847.GLYMA14G02970.1		GO:0005575,GO:0005622,GO:0005623,GO:0005737,GO:0005777,GO:0042579,GO:0043226,GO:0043227,GO:0043229,GO:0043231,GO:0044424,GO:0044444,GO:0044464	K13993	O	Hsp20/alpha crystallin family
MSTRG.27633	MR_inoculated	MS_control	-7.6179	7.20064	3.56776e-17	8.07964e-14	Down	Yes	XP_014522353.1		3847.GLYMA06G13100.4		GO:0000988,GO:0000990,GO:0000996,GO:0001053,GO:0003674,GO:0003824,GO:0003899,GO:0005575,GO:0005622,GO:0005623,GO:0005737,GO:0005739,GO:0006091,GO:0006139,GO:0006351,GO:0006352,GO:0006355,GO:0006461,GO:0006725,GO:0006807,GO:0006996,GO:0008150,GO:0008152,GO:0009058,GO:0009059,GO:0009314,GO:0009416,GO:0009507,GO:0009536,GO:0009628,GO:0009637,GO:0009639,GO:0009657,GO:0009658,GO:0009889,GO:0009891,GO:…	K03093	K	RNA polymerase sigma factor
MSTRG.32127	MR_inoculated	MS_control	-7.61441	7.09861	4.32924e-17	8.71475e-14	Down	Yes	XP_014491924.1		3847.GLYMA13G19910.1				K	Myb-like DNA-binding domain
MSTRG.12303	MR_inoculated	MS_control	7.37063	7.29409	1.13765e-16	2.06108e-13	Up	Yes	XP_022637879.1		3847.GLYMA14G37280.3		GO:0003674,GO:0005488,GO:0005515,GO:0005575,GO:0005622,GO:0005623,GO:0005634,GO:0008150,GO:0042752,GO:0042753,GO:0042802,GO:0042803,GO:0043226,GO:0043227,GO:0043229,GO:0043231,GO:0044424,GO:0044464,GO:0046983,GO:0048518,GO:0050789,GO:0065007		S	Protein of unknown function (DUF1313)
MSTRG.14922	MR_inoculated	MS_control	-7.28452	7.04852	2.60356e-16	4.28807e-13	Down	Yes	XP_022639023.1		3847.GLYMA16G25700.1				G	PQ-loop repeat family protein
MSTRG.16188	MR_inoculated	MS_control	7.12033	7.70051	2.87211e-16	4.33616e-13	Up	Yes	XP_022639436.1		3847.GLYMA05G30380.1		GO:0000003,GO:0003006,GO:0005575,GO:0005576,GO:0005578,GO:0005623,GO:0007275,GO:0008150,GO:0009791,GO:0009856,GO:0009908,GO:0022414,GO:0031012,GO:0032501,GO:0032502,GO:0044421,GO:0044464,GO:0044699,GO:0044703,GO:0044706,GO:0044707,GO:0044767,GO:0048046,GO:0048196,GO:0048367,GO:0048437,GO:0048438,GO:0048443,GO:0048466,GO:0048513,GO:0048569,GO:0048608,GO:0048653,GO:0048731,GO:0048827,GO:0048856,GO:…		S	Plastocyanin-like domain
MSTRG.32844	MR_inoculated	MS_control	-7.03561	7.75239	4.5299e-16	6.31294e-13	Down	Yes	XP_022633846.1		3847.GLYMA13G35191.1		GO:0000151,GO:0005575,GO:0005622,GO:0005623,GO:0005634,GO:0031461,GO:0032991,GO:0043226,GO:0043227,GO:0043229,GO:0043231,GO:0043234,GO:0044424,GO:0044464,GO:0080008	K10143	J	Protein SUPPRESSOR OF PHYA-105
MSTRG.1948	MR_inoculated	MS_control	6.92975	7.41256	1.1634e-15	1.50553e-12	Up	Yes	XP_014514153.1		3847.GLYMA20G30980.2	GI	GO:0000003,GO:0000302,GO:0003006,GO:0005575,GO:0005622,GO:0005623,GO:0005634,GO:0005654,GO:0005737,GO:0006355,GO:0006950,GO:0006979,GO:0007275,GO:0007623,GO:0008150,GO:0009266,GO:0009314,GO:0009409,GO:0009416,GO:0009628,GO:0009637,GO:0009639,GO:0009791,GO:0009889,GO:0009908,GO:0010035,GO:0010218,GO:0010378,GO:0010468,GO:0010556,GO:0019219,GO:0019222,GO:0022414,GO:0031323,GO:0031326,GO:0031974,GO:…	K12124	S	gigantea
MSTRG.990	MR_inoculated	MS_control	-6.84862	7.27909	2.14814e-15	2.59452e-12	Down	Yes	XP_014511786.1		3847.GLYMA16G34340.1				K	Myb-like DNA-binding domain
MSTRG.3251	MR_inoculated	MS_control	-6.56412	9.03058	4.20021e-15	4.75595e-12	Down	Yes	XP_014493849.1		3847.GLYMA11G14880.1		GO:0005575,GO:0005622,GO:0005623,GO:0005856,GO:0043226,GO:0043228,GO:0043229,GO:0043232,GO:0044424,GO:0044464	K10355	Z	Actins are highly conserved proteins that are involved in various types of cell motility and are ubiquitously expressed in all eukaryotic cells
MSTRG.19592	MR_inoculated	MS_control	6.5095	9.84033	4.94058e-15	5.2652e-12	Up	Yes	XP_014512700.1		3847.GLYMA10G01610.1				S	Calvin cycle protein
MSTRG.13480	MR_inoculated	MS_control	-6.90497	6.1753	8.12273e-15	8.17553e-12	Down	Yes	XP_014503907.1		3847.GLYMA17G37760.1	SN2	GO:0005575,GO:0005618,GO:0005623,GO:0030312,GO:0044464,GO:0071944		O	Gibberellin regulated protein
MSTRG.1488	MR_inoculated	MS_control	6.69827	6.7711	9.06697e-15	8.47066e-12	Up	Yes	XP_014512915.1		3847.GLYMA16G26070.1			K16297	O	serine carboxypeptidase-like
MSTRG.20586	MR_inoculated	MS_control	6.5398	7.67574	9.35106e-15	8.47066e-12	Up	Yes	XP_014514950.1		3847.GLYMA10G06620.1				K	RNA recognition motif. (a.k.a. RRM, RBD, or RNP domain)
MSTRG.17892	MR_inoculated	MS_control	-6.69044	6.28137	1.94475e-14	1.67777e-11	Down	Yes	XP_014509987.1		3847.GLYMA05G32950.1		GO:0005575,GO:0005622,GO:0005623,GO:0005737,GO:0005739,GO:0043226,GO:0043227,GO:0043229,GO:0043231,GO:0044424,GO:0044444,GO:0044464		S	Polyketide cyclase / dehydrase and lipid transport
MSTRG.1037	MR_inoculated	MS_control	6.53854	6.80451	2.10939e-14	1.69431e-11	Up	Yes	XP_014505690.1		3694.POPTR_0004s06640.1		GO:0005575,GO:0005576,GO:0005618,GO:0005623,GO:0030312,GO:0044464,GO:0048046,GO:0071944		O	miraculin-like
MSTRG.3020	MR_inoculated	MS_control	-6.45575	7.263	2.15097e-14	1.69431e-11	Down	Yes	XP_014494053.1		3847.GLYMA12G04630.1		GO:0000271,GO:0003674,GO:0003824,GO:0005575,GO:0005622,GO:0005623,GO:0005737,GO:0005975,GO:0005976,GO:0005982,GO:0006073,GO:0008150,GO:0008152,GO:0008878,GO:0009058,GO:0009059,GO:0009250,GO:0009507,GO:0009536,GO:0009987,GO:0016051,GO:0016740,GO:0016772,GO:0016779,GO:0019252,GO:0033692,GO:0034637,GO:0034645,GO:0043170,GO:0043226,GO:0043227,GO:0043229,GO:0043231,GO:0044042,GO:0044237,GO:0044238,GO:…	K00975	M	This protein plays a role in synthesis of starch. It catalyzes the synthesis of the activated glycosyl donor, ADP- glucose from Glc-1-P and ATP
MSTRG.22626	MR_inoculated	MS_control	-6.30108	8.80906	2.46749e-14	1.86265e-11	Down	Yes	XP_014516707.1		3847.GLYMA16G26520.1		GO:0005575,GO:0005622,GO:0005623,GO:0005737,GO:0005783,GO:0005886,GO:0008150,GO:0009628,GO:0016020,GO:0043226,GO:0043227,GO:0043229,GO:0043231,GO:0044424,GO:0044444,GO:0044464,GO:0050896,GO:0071944,GO:0080167	K00517,K13260	Q	cytochrome P450
MSTRG.22601	MR_inoculated	MS_control	-6.54893	6.55275	2.73611e-14	1.98281e-11	Down	Yes	XP_014516196.1		3847.GLYMA18G38130.1
MSTRG.11457	MR_inoculated	MS_control	6.38805	7.3152	3.06138e-14	2.13319e-11	Up	Yes	XP_022637641.1		3847.GLYMA14G04260.1				S	CY
MSTRG.7906	MR_inoculated	MS_control	6.46246	6.53817	4.46162e-14	2.9398e-11	Up	Yes	XP_014500406.1		3847.GLYMA09G08330.1				K	Transcription factor
MSTRG.150	MR_inoculated	MS_control	-6.42538	6.69184	4.54348e-14	2.9398e-11	Down	Yes	XP_014496692.1		3847.GLYMA19G00270.1		GO:0003674,GO:0005215,GO:0005342,GO:0005575,GO:0005622,GO:0005623,GO:0005737,GO:0006810,GO:0006811,GO:0006820,GO:0008028,GO:0008150,GO:0008509,GO:0008514,GO:0008643,GO:0009507,GO:0009526,GO:0009536,GO:0009941,GO:0009987,GO:0015075,GO:0015120,GO:0015121,GO:0015291,GO:0015297,GO:0015301,GO:0015711,GO:0015713,GO:0015714,GO:0015718,GO:0015748,GO:0015849,GO:0016020,GO:0022804,GO:0022857,GO:0022891,GO:…	K15283	G	phosphate translocator 2
MSTRG.7368	MR_inoculated	MS_control	-6.22736	8.26184	4.78967e-14	2.99222e-11	Down	Yes	XP_014498167.1		3847.GLYMA18G51320.1	CO1	GO:0000003,GO:0001071,GO:0003006,GO:0003674,GO:0003676,GO:0003677,GO:0003700,GO:0005488,GO:0005575,GO:0005622,GO:0005623,GO:0005634,GO:0006355,GO:0006996,GO:0007154,GO:0007165,GO:0007275,GO:0008150,GO:0008270,GO:0009314,GO:0009416,GO:0009628,GO:0009639,GO:0009648,GO:0009657,GO:0009658,GO:0009791,GO:0009889,GO:0009890,GO:0009892,GO:0009909,GO:0009987,GO:0010017,GO:0010018,GO:0010218,GO:0010229,GO:…	K12135	K	Zinc finger protein
MSTRG.5139	MR_inoculated	MS_control	-6.49372	6.08716	7.36522e-14	4.44785e-11	Down	Yes	XP_014496190.1		3847.GLYMA19G37100.1	OSI_18661	GO:0003674,GO:0003824,GO:0008150,GO:0008152,GO:0008194,GO:0009058,GO:0009314,GO:0009411,GO:0009416,GO:0009628,GO:0009812,GO:0009813,GO:0010224,GO:0016740,GO:0016757,GO:0016758,GO:0035251,GO:0042440,GO:0044710,GO:0046148,GO:0046527,GO:0050403,GO:0050502,GO:0050896,GO:0051552,GO:0051553,GO:0051554,GO:0051555,GO:0071704,GO:0080043,GO:0080044,GO:0080046,GO:1901576,GO:1901615,GO:1901617	K13496	C, G	UDP-glycosyltransferase
MSTRG.1127	MR_inoculated	MS_control	6.45049	5.94709	1.14789e-13	6.70852e-11	Up	Yes	XP_014506311.1		29760.VIT_17s0119g00120.t01		GO:0005575,GO:0005576,GO:0005618,GO:0005623,GO:0030312,GO:0044464,GO:0048046,GO:0071944		O	miraculin-like
MSTRG.33351	MR_inoculated	MS_control	6.03636	8.70461	1.40079e-13	7.93064e-11	Up	Yes	XP_014493060.1		3847.GLYMA08G45560.1				O	trypsin inhibitor
MSTRG.11595	MR_inoculated	MS_control	6.13539	6.98848	1.7904e-13	9.82927e-11	Up	Yes	XP_022637673.1		3702.AT2G05540.1				S	Glycine rich protein family
MSTRG.8215	MR_inoculated	MS_control	-6.26927	6.12632	2.2248e-13	1.18549e-10	Down	Yes	XP_022635928.1		3847.GLYMA04G35130.1				S	embryo development ending in birth or egg hatching
MSTRG.24973	MR_inoculated	MS_control	6.27185	6.04816	2.43455e-13	1.26019e-10	Up	Yes	XP_014519914.1		3847.GLYMA01G45110.1		GO:0005575,GO:0005618,GO:0005622,GO:0005623,GO:0005737,GO:0005773,GO:0005774,GO:0005829,GO:0016020,GO:0030312,GO:0031090,GO:0043226,GO:0043227,GO:0043229,GO:0043231,GO:0044422,GO:0044424,GO:0044437,GO:0044444,GO:0044446,GO:0044464,GO:0071944	K01051	G	pectinesterase
MSTRG.9918	MR_inoculated	MS_control	-6.47186	5.48854	2.53648e-13	1.27648e-10	Down	Yes	XP_014498419.1		3847.GLYMA15G00620.1		GO:0003674,GO:0005215,GO:0005575,GO:0005623,GO:0005886,GO:0006810,GO:0006811,GO:0006820,GO:0007154,GO:0008150,GO:0008509,GO:0008643,GO:0009605,GO:0009987,GO:0009991,GO:0010036,GO:0015075,GO:0015103,GO:0015144,GO:0015166,GO:0015168,GO:0015204,GO:0015665,GO:0015698,GO:0015791,GO:0015793,GO:0015840,GO:0015850,GO:0016020,GO:0019755,GO:0022857,GO:0022891,GO:0022892,GO:0031667,GO:0031668,GO:0031669,GO:…	K09874	G	Aquaporin
MSTRG.23226	MR_inoculated	MS_control	6.251	6.02763	2.79946e-13	1.37075e-10	Up	Yes	XP_014517922.1		3847.GLYMA13G10360.1		GO:0000096,GO:0000098,GO:0003674,GO:0003824,GO:0005575,GO:0005622,GO:0005623,GO:0005737,GO:0005829,GO:0006082,GO:0006461,GO:0006520,GO:0006555,GO:0006790,GO:0006807,GO:0006950,GO:0007154,GO:0008150,GO:0008152,GO:0009056,GO:0009063,GO:0009066,GO:0009068,GO:0009087,GO:0009267,GO:0009414,GO:0009415,GO:0009605,GO:0009628,GO:0009970,GO:0009987,GO:0009991,GO:0010035,GO:0016043,GO:0016054,GO:0016829,GO:…	K01761	E	methionine
MSTRG.25325	MR_inoculated	MS_control	-6.40651	5.55953	2.96392e-13	1.41309e-10	Down	Yes	XP_014520255.1		3847.GLYMA01G41650.2				G	Formyltetrahydrofolate deformylase
MSTRG.7725	MR_inoculated	MS_control	-6.19076	6.19966	3.05688e-13	1.42004e-10	Down	Yes	XP_014499052.1		3847.GLYMA09G04337.1	BXL1	GO:0000003,GO:0003006,GO:0003674,GO:0003824,GO:0004553,GO:0005575,GO:0005576,GO:0005578,GO:0005618,GO:0005623,GO:0007275,GO:0008150,GO:0008152,GO:0009505,GO:0009791,GO:0010154,GO:0010214,GO:0016787,GO:0016798,GO:0022414,GO:0030312,GO:0031012,GO:0032501,GO:0032502,GO:0044421,GO:0044464,GO:0044699,GO:0044707,GO:0046556,GO:0048046,GO:0048316,GO:0048608,GO:0048731,GO:0048856,GO:0061458,GO:0071944		G	beta-D-xylosidase
MSTRG.5338	MR_inoculated	MS_control	6.07383	6.34651	4.80803e-13	2.17768e-10	Up	Yes	XP_014495035.1		3847.GLYMA03G36500.1				S	alpha/beta hydrolase fold
MSTRG.24532	MR_inoculated	MS_control	-6.3002	5.45493	6.02724e-13	2.6633e-10	Down	Yes	XP_022642771.1		3847.GLYMA13G31420.4		GO:0003674,GO:0003824,GO:0004038,GO:0005575,GO:0005622,GO:0005623,GO:0005737,GO:0005783,GO:0006807,GO:0006950,GO:0006995,GO:0007154,GO:0008150,GO:0008152,GO:0009056,GO:0009267,GO:0009605,GO:0009987,GO:0009991,GO:0010135,GO:0010136,GO:0016787,GO:0016810,GO:0016812,GO:0031667,GO:0031668,GO:0031669,GO:0033554,GO:0034641,GO:0042594,GO:0043226,GO:0043227,GO:0043229,GO:0043231,GO:0043562,GO:0043603,GO:…	K01466	F	allantoinase
MSTRG.10468	MR_inoculated	MS_control	5.82413	7.84829	7.20275e-13	3.10696e-10	Up	Yes	XP_014502118.1		3847.GLYMA15G01420.1		GO:0003674,GO:0005215,GO:0005471,GO:0005575,GO:0005622,GO:0005623,GO:0005737,GO:0006810,GO:0008150,GO:0009507,GO:0009526,GO:0009536,GO:0009941,GO:0009987,GO:0015291,GO:0015297,GO:0016020,GO:0022804,GO:0022857,GO:0031090,GO:0031967,GO:0031969,GO:0031975,GO:0042170,GO:0043226,GO:0043227,GO:0043229,GO:0043231,GO:0044422,GO:0044424,GO:0044434,GO:0044435,GO:0044444,GO:0044446,GO:0044464,GO:0044699,GO:…	K03301	P	ADP,ATP carrier protein 1
MSTRG.14468	MR_inoculated	MS_control	5.81927	7.09096	1.09808e-12	4.6265e-10	Up	Yes	XP_022638890.1		3847.GLYMA20G03250.2		GO:0003674,GO:0003824,GO:0004645,GO:0005575,GO:0005622,GO:0005623,GO:0005737,GO:0006950,GO:0008150,GO:0008152,GO:0009266,GO:0009414,GO:0009415,GO:0009501,GO:0009507,GO:0009532,GO:0009536,GO:0009570,GO:0009628,GO:0010035,GO:0016740,GO:0016757,GO:0016758,GO:0042221,GO:0043226,GO:0043227,GO:0043229,GO:0043231,GO:0044422,GO:0044424,GO:0044434,GO:0044435,GO:0044444,GO:0044446,GO:0044464,GO:0050896,GO:…	K00688	G	Phosphorylase is an important allosteric enzyme in carbohydrate metabolism. Enzymes from different sources differ in their regulatory mechanisms and in their natural substrates. However, all known phosphorylases share catalytic and structural properties (By similarity)
MSTRG.6597	MR_inoculated	MS_control	5.94006	6.2151	1.16786e-12	4.80867e-10	Up	Yes	XP_014497323.1		3847.GLYMA07G23800.1		GO:0005575,GO:0005622,GO:0005623,GO:0005737,GO:0006091,GO:0008150,GO:0008152,GO:0009507,GO:0009536,GO:0009767,GO:0009773,GO:0009987,GO:0010598,GO:0015979,GO:0016020,GO:0019684,GO:0022900,GO:0032991,GO:0043226,GO:0043227,GO:0043229,GO:0043231,GO:0043234,GO:0044237,GO:0044424,GO:0044425,GO:0044444,GO:0044464,GO:0044710,GO:0055114
MSTRG.23951	MR_inoculated	MS_control	-5.69456	8.46643	1.36044e-12	5.47681e-10	Down	Yes	XP_014518532.1		3847.GLYMA15G13090.1		GO:0000293,GO:0003674,GO:0003824,GO:0005575,GO:0005622,GO:0005623,GO:0005737,GO:0005886,GO:0006091,GO:0008150,GO:0008152,GO:0009314,GO:0009416,GO:0009507,GO:0009526,GO:0009536,GO:0009628,GO:0009767,GO:0009941,GO:0009987,GO:0015979,GO:0016020,GO:0016491,GO:0016722,GO:0016723,GO:0019684,GO:0022900,GO:0031090,GO:0031967,GO:0031969,GO:0031975,GO:0042170,GO:0043226,GO:0043227,GO:0043229,GO:0043231,GO:…		P, Q	reductase
MSTRG.9496	MR_inoculated	MS_control	-5.73261	7.66584	1.39059e-12	5.47681e-10	Down	Yes	XP_014501510.1		3847.GLYMA04G03581.1				O	DnaJ domain
MSTRG.759	MR_inoculated	MS_control	5.65986	8.10133	1.86781e-12	7.19981e-10	Up	Yes	XP_014515973.1		3847.GLYMA09G31970.1				S	sigma factor SigB regulation protein RsbQ-like
MSTRG.13445	MR_inoculated	MS_control	5.82383	6.32188	2.00841e-12	7.5805e-10	Up	Yes	XP_014503781.1		3847.GLYMA14G39950.1		GO:0005575,GO:0005623,GO:0005886,GO:0016020,GO:0044464,GO:0071944
MSTRG.22374	MR_inoculated	MS_control	-5.79465	6.39121	2.21435e-12	8.18721e-10	Down	Yes	XP_014515497.1		3847.GLYMA09G05550.1	OSI_02229		K04730	T	LRR receptor-like serine threonine-protein kinase
MSTRG.14159	MR_inoculated	MS_control	5.92773	5.71006	2.41755e-12	8.75975e-10	Up	Yes	XP_014507707.2		3847.GLYMA20G02220.1		GO:0003674,GO:0003824,GO:0004610,GO:0005575,GO:0005622,GO:0005623,GO:0005737,GO:0005829,GO:0006040,GO:0006047,GO:0006048,GO:0006139,GO:0006725,GO:0006753,GO:0006793,GO:0006796,GO:0006807,GO:0008150,GO:0008152,GO:0009058,GO:0009117,GO:0009165,GO:0009225,GO:0009226,GO:0009507,GO:0009532,GO:0009536,GO:0009570,GO:0009987,GO:0016853,GO:0016866,GO:0016868,GO:0018130,GO:0019438,GO:0019637,GO:0034641,GO:…		G	Phosphoglucomutase/phosphomannomutase, alpha/beta/alpha domain III
MSTRG.16475	MR_inoculated	MS_control	-5.50865	11.0024	3.45435e-12	1.22711e-09	Down	Yes	XP_014509202.1		3847.GLYMA17G08310.1	ALDH11A3	GO:0005575,GO:0005622,GO:0005623,GO:0005737,GO:0044424,GO:0044464	K00131	C	glyceraldehyde-3-phosphate dehydrogenase
MSTRG.12654	MR_inoculated	MS_control	-5.79205	5.94452	3.6665e-12	1.27742e-09	Down	Yes	XP_014503968.1		29760.VIT_09s0002g03030.t01				T	Leucine-rich repeat receptor-like protein kinase
MSTRG.27288	MR_inoculated	MS_control	5.96354	5.24911	4.3776e-12	1.47765e-09	Up	Yes	XP_014522025.1		3847.GLYMA12G34230.1		GO:0005575,GO:0005622,GO:0005623,GO:0005737,GO:0009507,GO:0009532,GO:0009536,GO:0009570,GO:0043226,GO:0043227,GO:0043229,GO:0043231,GO:0044422,GO:0044424,GO:0044434,GO:0044435,GO:0044444,GO:0044446,GO:0044464
MSTRG.22783	MR_inoculated	MS_control	5.67213	6.40882	4.40431e-12	1.47765e-09	Up	Yes	XP_014515859.1		3847.GLYMA03G03100.2	CRR4	GO:0005575,GO:0005622,GO:0005623,GO:0005737,GO:0009507,GO:0009536,GO:0043226,GO:0043227,GO:0043229,GO:0043231,GO:0044424,GO:0044444,GO:0044464		S	Pentatricopeptide repeat-containing protein
MSTRG.15367	MR_inoculated	MS_control	5.60789	6.79112	4.77302e-12	1.57223e-09	Up	Yes	XP_014507326.1		3847.GLYMA17G14330.1		GO:0005575,GO:0005622,GO:0005623,GO:0005737,GO:0005783,GO:0043226,GO:0043227,GO:0043229,GO:0043231,GO:0044424,GO:0044444,GO:0044464	K00512	Q	cytochrome P450
MSTRG.8801	MR_inoculated	MS_control	5.80232	5.6688	4.9328e-12	1.59585e-09	Up	Yes	XP_014502329.1		3847.GLYMA04G09770.1				S	Mitochondrial
MSTRG.16293	MR_inoculated	MS_control	5.62998	6.4924	5.23797e-12	1.66485e-09	Up	Yes	XP_014507914.1		3847.GLYMA05G08240.1
MSTRG.23593	MR_inoculated	MS_control	-5.96633	5.12732	5.52293e-12	1.72515e-09	Down	Yes	XP_022642711.1		3847.GLYMA18G05050.1				K	Transcription factor
MSTRG.27838	MR_inoculated	MS_control	5.55251	6.79943	6.61177e-12	2.03026e-09	Up	Yes
MSTRG.10649	MR_inoculated	MS_control	5.46795	7.56878	7.52438e-12	2.27199e-09	Up	Yes	XP_014501157.1		3847.GLYMA13G42330.1	LOX10	GO:0005575,GO:0005622,GO:0005623,GO:0005737,GO:0044424,GO:0044464	K00454,K15718	S	Plant lipoxygenase may be involved in a number of diverse aspects of plant physiology including growth and development, pest resistance, and senescence or responses to wounding (By similarity)
MSTRG.3862	MR_inoculated	MS_control	-5.90485	5.06715	8.28369e-12	2.42022e-09	Down	Yes	XP_014493636.1		3847.GLYMA06G42180.1			K10418	Z	dynein light chain
MSTRG.13281	MR_inoculated	MS_control	5.74043	5.52668	8.35344e-12	2.42022e-09	Up	Yes	XP_022638267.1		3847.GLYMA17G36060.1		GO:0006950,GO:0008150,GO:0009266,GO:0009409,GO:0009628,GO:0050896,GO:0080167		S	expressed protein
MSTRG.23706	MR_inoculated	MS_control	5.38353	9.76411	8.41606e-12	2.42022e-09	Up	Yes	XP_014518445.1		3847.GLYMA19G42890.1	CSD1	GO:0000302,GO:0000303,GO:0003674,GO:0003824,GO:0004784,GO:0005488,GO:0005507,GO:0005575,GO:0005576,GO:0005622,GO:0005623,GO:0005737,GO:0005829,GO:0006801,GO:0006950,GO:0006952,GO:0006970,GO:0006979,GO:0008150,GO:0008152,GO:0008270,GO:0009314,GO:0009411,GO:0009416,GO:0009607,GO:0009617,GO:0009628,GO:0009642,GO:0009651,GO:0009743,GO:0009744,GO:0009892,GO:0009987,GO:0010033,GO:0010035,GO:0010038,GO:…	K04565	P	Destroys radicals which are normally produced within the cells and which are toxic to biological systems (By similarity)
MSTRG.28585	MR_inoculated	MS_control	5.89429	5.0578	8.77155e-12	2.48303e-09	Up	Yes	XP_014523352.1		3847.GLYMA01G04015.1				S	auxin-induced protein 5NG4-like
MSTRG.23447	MR_inoculated	MS_control	5.37326	9.26406	9.45355e-12	2.63492e-09	Up	Yes	XP_014518300.1		3847.GLYMA18G07290.1	THIC	GO:0003674,GO:0003824,GO:0005488,GO:0005575,GO:0005622,GO:0005623,GO:0005737,GO:0006725,GO:0006766,GO:0006767,GO:0006772,GO:0006790,GO:0006807,GO:0007584,GO:0008150,GO:0008152,GO:0009058,GO:0009110,GO:0009228,GO:0009507,GO:0009532,GO:0009536,GO:0009570,GO:0009605,GO:0009719,GO:0009987,GO:0009991,GO:0010033,GO:0010243,GO:0010266,GO:0014070,GO:0016462,GO:0016787,GO:0016817,GO:0016818,GO:0018130,GO:…	K03147	H	Thiamine biosynthesis protein ThiC
MSTRG.24043	MR_inoculated	MS_control	-5.45547	6.95543	1.08518e-11	2.97883e-09	Down	Yes	XP_014519100.1		3847.GLYMA15G12200.1		GO:0003674,GO:0005215,GO:0005310,GO:0005342,GO:0005575,GO:0005622,GO:0005623,GO:0005737,GO:0005773,GO:0005774,GO:0006810,GO:0006811,GO:0006820,GO:0006835,GO:0006873,GO:0006885,GO:0008150,GO:0008509,GO:0008514,GO:0009987,GO:0015075,GO:0015140,GO:0015556,GO:0015711,GO:0015740,GO:0015743,GO:0015849,GO:0016020,GO:0019725,GO:0022857,GO:0022891,GO:0022892,GO:0030003,GO:0030004,GO:0030641,GO:0031090,GO:…	K14430,K14445	P	tonoplast dicarboxylate
MSTRG.8930	MR_inoculated	MS_control	5.71886	5.32721	1.26654e-11	3.39728e-09	Up	Yes
MSTRG.15324	MR_inoculated	MS_control	-5.39035	7.47504	1.27513e-11	3.39728e-09	Down	Yes	NP_001304253.1		3847.GLYMA05G04290.1	SAI	GO:0000325,GO:0003674,GO:0003824,GO:0004553,GO:0004564,GO:0005575,GO:0005618,GO:0005622,GO:0005623,GO:0005737,GO:0005773,GO:0007275,GO:0008150,GO:0008152,GO:0009505,GO:0009607,GO:0009617,GO:0009719,GO:0009725,GO:0009739,GO:0009987,GO:0010033,GO:0016787,GO:0016798,GO:0022622,GO:0030312,GO:0032501,GO:0032502,GO:0032870,GO:0033993,GO:0042221,GO:0043226,GO:0043227,GO:0043229,GO:0043231,GO:0044424,GO:…	K01193	G	beta-fructofuranosidase
MSTRG.14547	MR_inoculated	MS_control	-5.50663	6.15649	1.43657e-11	3.77194e-09	Down	Yes	XP_014509989.1		3847.GLYMA05G14760.1		GO:0000325,GO:0003674,GO:0005215,GO:0005575,GO:0005622,GO:0005623,GO:0005737,GO:0005773,GO:0005774,GO:0006810,GO:0006811,GO:0006812,GO:0006818,GO:0006820,GO:0006821,GO:0008150,GO:0008324,GO:0008509,GO:0009671,GO:0009705,GO:0009987,GO:0010035,GO:0010167,GO:0015075,GO:0015077,GO:0015078,GO:0015103,GO:0015112,GO:0015291,GO:0015293,GO:0015294,GO:0015296,GO:0015672,GO:0015698,GO:0015706,GO:0015992,GO:…	K05016	P	chloride channel
MSTRG.10459	MR_inoculated	MS_control	5.44961	6.53742	1.45871e-11	3.77536e-09	Up	Yes	XP_014498612.1		3847.GLYMA13G43970.1				S	Protein of unknown function (DUF642)
MSTRG.24637	MR_inoculated	MS_control	5.53675	5.87878	1.58514e-11	4.04479e-09	Up	Yes	XP_014517007.1		29760.VIT_00s0266g00010.t01		GO:0003674,GO:0003824,GO:0005575,GO:0005622,GO:0005623,GO:0005737,GO:0006629,GO:0006720,GO:0008150,GO:0008152,GO:0008299,GO:0008610,GO:0009058,GO:0009507,GO:0009536,GO:0009987,GO:0016829,GO:0016835,GO:0016838,GO:0034007,GO:0042214,GO:0043226,GO:0043227,GO:0043229,GO:0043231,GO:0043692,GO:0043693,GO:0044237,GO:0044238,GO:0044249,GO:0044255,GO:0044424,GO:0044444,GO:0044464,GO:0044710,GO:0046246,GO:…	K15086	S	synthase
MSTRG.20665	MR_inoculated	MS_control	-5.53368	5.87482	1.63771e-11	4.1209e-09	Down	Yes	XP_014512347.1		3847.GLYMA10G37560.1	OSI_09800	GO:0003674,GO:0003824,GO:0004497,GO:0005575,GO:0005622,GO:0005623,GO:0005737,GO:0006629,GO:0006720,GO:0006721,GO:0008150,GO:0008152,GO:0008299,GO:0008610,GO:0009058,GO:0009507,GO:0009526,GO:0009536,GO:0009941,GO:0009987,GO:0010291,GO:0016020,GO:0016108,GO:0016109,GO:0016114,GO:0016116,GO:0016117,GO:0016119,GO:0016122,GO:0016123,GO:0016491,GO:0031090,GO:0031967,GO:0031969,GO:0031975,GO:0042170,GO:…	K15746	I	Beta-carotene hydroxylase
MSTRG.31202	MR_inoculated	MS_control	5.33724	7.42419	1.79853e-11	4.46355e-09	Up	Yes	XP_014490839.1		3847.GLYMA09G21010.1				S	Bet_v_1
MSTRG.3152	MR_inoculated	MS_control	5.65598	5.26581	1.91505e-11	4.68851e-09	Up	Yes
MSTRG.10913	MR_inoculated	MS_control	-5.40728	6.46059	1.98044e-11	4.69873e-09	Down	Yes	XP_014500916.1		3847.GLYMA13G37970.1				S	BBOX
MSTRG.30065	MR_inoculated	MS_control	5.47659	5.98233	1.9886e-11	4.69873e-09	Up	Yes
MSTRG.3316	MR_inoculated	MS_control	-5.31199	7.59082	1.99703e-11	4.69873e-09	Down	Yes	XP_022634173.1		3847.GLYMA12G07890.3	NPH1	GO:0000166,GO:0003674,GO:0003824,GO:0004672,GO:0004674,GO:0004871,GO:0004872,GO:0005488,GO:0005575,GO:0005622,GO:0005623,GO:0005737,GO:0005773,GO:0005886,GO:0006464,GO:0006468,GO:0006793,GO:0006796,GO:0006996,GO:0007154,GO:0007165,GO:0008150,GO:0008152,GO:0009314,GO:0009416,GO:0009605,GO:0009606,GO:0009628,GO:0009637,GO:0009638,GO:0009657,GO:0009658,GO:0009785,GO:0009881,GO:0009882,GO:0009898,GO:…	K08282	T	blue light photoreceptor
MSTRG.4921	MR_inoculated	MS_control	5.37694	6.65829	2.07028e-11	4.80861e-09	Up	Yes	XP_014495292.1		3847.GLYMA03G29150.1				Q	ABC-2 type transporter
MSTRG.16081	MR_inoculated	MS_control	5.59299	5.3827	2.20497e-11	5.05663e-09	Up	Yes	XP_014507650.2		3847.GLYMA08G13640.2	OSI_39096	GO:0003333,GO:0003674,GO:0005215,GO:0005310,GO:0005313,GO:0005342,GO:0005575,GO:0005623,GO:0005886,GO:0006810,GO:0006811,GO:0006812,GO:0006820,GO:0006835,GO:0006865,GO:0008150,GO:0008324,GO:0008509,GO:0008514,GO:0009987,GO:0015075,GO:0015171,GO:0015172,GO:0015174,GO:0015179,GO:0015181,GO:0015189,GO:0015326,GO:0015711,GO:0015800,GO:0015802,GO:0015807,GO:0015809,GO:0015813,GO:0015819,GO:0015849,GO:…	K03294	E	cationic amino acid transporter
MSTRG.24327	MR_inoculated	MS_control	5.3736	6.35695	2.60424e-11	5.89763e-09	Up	Yes	XP_014518003.1		3847.GLYMA06G44100.1				S	GDSL esterase lipase
MSTRG.1033	MR_inoculated	MS_control	5.27153	7.1183	3.06639e-11	6.8585e-09	Up	Yes
MSTRG.5544	MR_inoculated	MS_control	-5.24598	7.38485	3.24222e-11	7.14297e-09	Down	Yes
MSTRG.11353	MR_inoculated	MS_control	-5.35849	6.18605	3.27278e-11	7.14297e-09	Down	Yes	XP_022637586.1		3847.GLYMA02G45450.1		GO:0005575,GO:0005622,GO:0005623,GO:0005737,GO:0009507,GO:0009534,GO:0009535,GO:0009536,GO:0009579,GO:0016020,GO:0031976,GO:0031984,GO:0034357,GO:0042651,GO:0043226,GO:0043227,GO:0043229,GO:0043231,GO:0044422,GO:0044424,GO:0044434,GO:0044435,GO:0044436,GO:0044444,GO:0044446,GO:0044464,GO:0055035
MSTRG.15096	MR_inoculated	MS_control	-5.29902	6.64007	3.34355e-11	7.14297e-09	Down	Yes	XP_014510403.1		3847.GLYMA17G17530.1		GO:0005575,GO:0005622,GO:0005623,GO:0005737,GO:0005773,GO:0043226,GO:0043227,GO:0043229,GO:0043231,GO:0044424,GO:0044444,GO:0044464	K01455	C	K01455 formamidase EC 3.5.1.49
MSTRG.25055	MR_inoculated	MS_control	-5.26165	7.06663	3.35128e-11	7.14297e-09	Down	Yes	XP_022631555.1		3847.GLYMA01G44491.1		GO:0005575,GO:0005622,GO:0005623,GO:0005634,GO:0006355,GO:0008150,GO:0009889,GO:0010468,GO:0010556,GO:0019219,GO:0019222,GO:0031323,GO:0031326,GO:0040007,GO:0043226,GO:0043227,GO:0043229,GO:0043231,GO:0044424,GO:0044464,GO:0050789,GO:0050794,GO:0051171,GO:0051252,GO:0060255,GO:0065007,GO:0080090,GO:2000112,GO:2001141		S	Plus-3 domain
MSTRG.28545	MR_inoculated	MS_control	-5.36781	5.97419	3.74018e-11	7.87917e-09	Down	Yes	XP_014523324.1		3847.GLYMA18G12890.1	SPS	GO:0005575,GO:0005622,GO:0005623,GO:0005634,GO:0043226,GO:0043227,GO:0043229,GO:0043231,GO:0044424,GO:0044464	K00696	M	Plays a role in photosynthetic sucrose synthesis by catalyzing the rate-limiting step of sucrose biosynthesis from UDP-glucose and fructose- 6-phosphate. Involved in the regulation of carbon partitioning in the leaves of plants. May regulate the synthesis of sucrose and therefore play a major role as a limiting factor in the export of photoassimilates out of the leaf. Plays a role for sucrose ava…
MSTRG.7849	MR_inoculated	MS_control	5.45009	5.2435	5.62029e-11	1.17038e-08	Up	Yes	XP_014501041.1		3847.GLYMA09G05580.1		GO:0003333,GO:0003674,GO:0005215,GO:0005310,GO:0005313,GO:0005342,GO:0005575,GO:0005623,GO:0005886,GO:0006810,GO:0006811,GO:0006812,GO:0006820,GO:0006835,GO:0006865,GO:0008150,GO:0008324,GO:0008509,GO:0008514,GO:0009987,GO:0015075,GO:0015171,GO:0015172,GO:0015174,GO:0015179,GO:0015181,GO:0015189,GO:0015711,GO:0015800,GO:0015802,GO:0015807,GO:0015809,GO:0015813,GO:0015819,GO:0015849,GO:0016020,GO:…	K03294	E	Cationic amino acid transporter
MSTRG.33433	MR_inoculated	MS_control	-5.21741	6.47183	6.03349e-11	1.24214e-08	Down	Yes	XP_014493156.1		3847.GLYMA07G16740.1		GO:0005575,GO:0005622,GO:0005623,GO:0005634,GO:0016020,GO:0043226,GO:0043227,GO:0043229,GO:0043231,GO:0044424,GO:0044464	K14638	E	transporter
MSTRG.1447	MR_inoculated	MS_control	5.24437	6.19394	6.21973e-11	1.2661e-08	Up	Yes	XP_014503059.1		3847.GLYMA13G07770.1				S	GDSL esterase lipase
MSTRG.23203	MR_inoculated	MS_control	-5.05074	9.6439	7.48504e-11	1.50674e-08	Down	Yes	XP_014518831.1		3847.GLYMA02G25930.1				C, G	UDP-glycosyltransferase
MSTRG.11863	MR_inoculated	MS_control	5.55434	4.72626	8.10913e-11	1.61443e-08	Up	Yes	XP_014503550.1		3847.GLYMA14G39300.1		GO:0008150,GO:0009719,GO:0010033,GO:0010200,GO:0010243,GO:0042221,GO:0050896,GO:1901698,GO:1901700		O	U-box domain-containing protein
MSTRG.17338	MR_inoculated	MS_control	5.1312	6.58847	9.39132e-11	1.84938e-08	Up	Yes	XP_014505789.1		3847.GLYMA05G34530.1	FKF1	GO:0000975,GO:0001047,GO:0001067,GO:0003674,GO:0003676,GO:0003677,GO:0005488,GO:0005575,GO:0005622,GO:0005623,GO:0005634,GO:0005737,GO:0006355,GO:0007623,GO:0008150,GO:0009314,GO:0009416,GO:0009628,GO:0009637,GO:0009889,GO:0009909,GO:0009911,GO:0010468,GO:0010556,GO:0019219,GO:0019222,GO:0031323,GO:0031326,GO:0043226,GO:0043227,GO:0043229,GO:0043231,GO:0044212,GO:0044424,GO:0044464,GO:0048511,GO:…	K12116	O	Component of an E3 ubiquitin ligase complex that plays a central role in blue light-dependent circadian cycles. Acts as a blue light photoreceptor, due to the presence of FMN, that mediates light-regulated protein degradation of critical clock components by targeting them to the proteasome complex
MSTRG.3067	MR_inoculated	MS_control	5.43421	4.95171	9.56889e-11	1.86408e-08	Up	Yes	XP_014493453.1		3847.GLYMA12G05080.1
MSTRG.28577	MR_inoculated	MS_control	-5.07696	7.20399	9.88204e-11	1.90461e-08	Down	Yes	XP_014523335.1		3847.GLYMA02G03695.1				S	auxin-induced protein
MSTRG.27886	MR_inoculated	MS_control	-4.99332	8.16221	1.29256e-10	2.46498e-08	Down	Yes	XP_014522652.1		3847.GLYMA05G35470.2			K17710	T	Pentatricopeptide repeat-containing protein
MSTRG.27465	MR_inoculated	MS_control	4.94837	10.0299	1.41193e-10	2.66459e-08	Up	Yes	XP_014522196.1		3847.GLYMA08G45600.1				O	trypsin inhibitor
MSTRG.25136	MR_inoculated	MS_control	5.15836	5.45245	2.00659e-10	3.74777e-08	Up	Yes	XP_014519928.1		3847.GLYMA01G43450.1		GO:0001071,GO:0003674,GO:0003700,GO:0005575,GO:0005622,GO:0005623,GO:0005634,GO:0006355,GO:0008150,GO:0009719,GO:0009889,GO:0010033,GO:0010200,GO:0010243,GO:0010468,GO:0010556,GO:0019219,GO:0019222,GO:0031323,GO:0031326,GO:0042221,GO:0043226,GO:0043227,GO:0043229,GO:0043231,GO:0044424,GO:0044464,GO:0050789,GO:0050794,GO:0050896,GO:0051171,GO:0051252,GO:0060255,GO:0065007,GO:0080090,GO:1901698,GO:…		K	Transcription factor
MSTRG.783	MR_inoculated	MS_control	-4.90425	8.32232	2.21602e-10	4.09669e-08	Down	Yes	XP_014511026.1		3847.GLYMA07G10161.1				K	B-box zinc finger
MSTRG.3839	MR_inoculated	MS_control	-5.09874	5.61419	2.37744e-10	4.33718e-08	Down	Yes	XP_014493301.1		3847.GLYMA12G16830.2			K15803	S	synthase
MSTRG.28089	MR_inoculated	MS_control	4.93427	7.17932	2.39398e-10	4.33718e-08	Up	Yes	XP_014522835.1		3847.GLYMA13G26600.1		GO:0005575,GO:0005618,GO:0005623,GO:0009505,GO:0030312,GO:0044464,GO:0071944		O	aspartic proteinase
MSTRG.8160	MR_inoculated	MS_control	-4.9044	7.68597	2.50868e-10	4.49972e-08	Down	Yes	XP_014501088.1		3847.GLYMA15G22820.1	INT2	GO:0003674,GO:0005215,GO:0005365,GO:0005366,GO:0005575,GO:0005623,GO:0005886,GO:0006810,GO:0006811,GO:0006812,GO:0006818,GO:0008150,GO:0008324,GO:0009987,GO:0015075,GO:0015166,GO:0015291,GO:0015293,GO:0015294,GO:0015295,GO:0015665,GO:0015672,GO:0015791,GO:0015798,GO:0015850,GO:0015992,GO:0016020,GO:0022804,GO:0022857,GO:0022891,GO:0022892,GO:0023052,GO:0034220,GO:0042995,GO:0044464,GO:0044699,GO:…	K08150	G	inositol transporter
MSTRG.29347	MR_inoculated	MS_control	-4.87586	8.65706	2.53337e-10	4.49972e-08	Down	Yes	NP_001304242.1		3847.GLYMA07G05580.3	WX	GO:0003674,GO:0003824,GO:0004373,GO:0005575,GO:0005622,GO:0005623,GO:0005737,GO:0005975,GO:0005976,GO:0005982,GO:0006073,GO:0008150,GO:0008152,GO:0008194,GO:0009501,GO:0009507,GO:0009536,GO:0009987,GO:0016740,GO:0016757,GO:0016758,GO:0035251,GO:0043170,GO:0043226,GO:0043227,GO:0043229,GO:0043231,GO:0044042,GO:0044237,GO:0044238,GO:0044260,GO:0044262,GO:0044264,GO:0044424,GO:0044444,GO:0044464,GO:…	K13679	M	Granule-bound starch synthase
MSTRG.22583	MR_inoculated	MS_control	-4.904	7.52794	2.61651e-10	4.60227e-08	Down	Yes	XP_014516759.1		3847.GLYMA03G19810.1			K07025,K18551	S	Haloacid dehalogenase-like hydrolase family protein
MSTRG.22566	MR_inoculated	MS_control	-5.40297	4.44352	2.85717e-10	4.97724e-08	Down	Yes	XP_014516843.1		3847.GLYMA03G12070.1				O	26S protease regulatory subunit
MSTRG.24539	MR_inoculated	MS_control	-5.13828	5.09857	3.45945e-10	5.96903e-08	Down	Yes	XP_022642773.1		3847.GLYMA15G07930.1				S	Pfam:DUF3711
MSTRG.5732	MR_inoculated	MS_control	-5.36542	4.40716	3.63697e-10	6.21192e-08	Down	Yes	XP_022635133.1		3847.GLYMA18G03870.1	OSI_20201			D, Z	Regulator of chromosome condensation
MSTRG.11101	MR_inoculated	MS_control	-5.25572	4.67243	3.6688e-10	6.21192e-08	Down	Yes
MSTRG.15930	MR_inoculated	MS_control	-4.8904	6.74774	3.71308e-10	6.22869e-08	Down	Yes	XP_014510300.1		3847.GLYMA17G10920.3		GO:0001071,GO:0003674,GO:0003700,GO:0005575,GO:0005622,GO:0005623,GO:0005634,GO:0006355,GO:0008150,GO:0009889,GO:0010468,GO:0010556,GO:0019219,GO:0019222,GO:0031323,GO:0031326,GO:0043226,GO:0043227,GO:0043229,GO:0043231,GO:0044424,GO:0044464,GO:0050789,GO:0050794,GO:0051171,GO:0051252,GO:0060255,GO:0065007,GO:0080090,GO:2000112,GO:2001141		K	dof zinc finger protein
MSTRG.10526	MR_inoculated	MS_control	5.3149	4.49401	3.80893e-10	6.33086e-08	Up	Yes	XP_014501388.2		3847.GLYMA15G01900.1	OSI_03816		K10418	Z	dynein light chain
MSTRG.28742	MR_inoculated	MS_control	-5.0401	5.39541	4.09732e-10	6.74828e-08	Down	Yes	XP_014523510.1		3847.GLYMA05G28900.1		GO:0005575,GO:0005622,GO:0005623,GO:0005737,GO:0009507,GO:0009526,GO:0009528,GO:0009536,GO:0009706,GO:0009941,GO:0016020,GO:0019866,GO:0031090,GO:0031967,GO:0031969,GO:0031975,GO:0042170,GO:0043226,GO:0043227,GO:0043229,GO:0043231,GO:0044422,GO:0044424,GO:0044434,GO:0044435,GO:0044444,GO:0044446,GO:0044464		P	pheophorbide a oxygenase
MSTRG.2362	MR_inoculated	MS_control	-4.97175	5.76938	4.21061e-10	6.8724e-08	Down	Yes	XP_014503371.1		3847.GLYMA16G29790.1	OSI_09800	GO:0003674,GO:0003824,GO:0004497,GO:0005575,GO:0005622,GO:0005623,GO:0005737,GO:0006629,GO:0006720,GO:0006721,GO:0008150,GO:0008152,GO:0008299,GO:0008610,GO:0009058,GO:0009507,GO:0009526,GO:0009536,GO:0009941,GO:0009987,GO:0010291,GO:0016020,GO:0016108,GO:0016109,GO:0016114,GO:0016116,GO:0016117,GO:0016119,GO:0016122,GO:0016123,GO:0016491,GO:0031090,GO:0031967,GO:0031969,GO:0031975,GO:0042170,GO:…	K15746	I	Beta-carotene hydroxylase
MSTRG.53	MR_inoculated	MS_control	-4.89657	6.36041	4.32428e-10	6.99491e-08	Down	Yes	XP_022636815.1		3847.GLYMA19G00770.1			K03327	V	Mate efflux family protein
MSTRG.11815	MR_inoculated	MS_control	-4.93675	5.96852	4.40892e-10	7.06872e-08	Down	Yes	XP_014502716.1		3847.GLYMA02G41340.1				T	receptor-like protein kinase
MSTRG.11373	MR_inoculated	MS_control	4.83547	7.09928	4.52166e-10	7.18586e-08	Up	Yes
MSTRG.10476	MR_inoculated	MS_control	-4.95548	5.75367	4.67701e-10	7.36812e-08	Down	Yes	XP_014498710.1		3847.GLYMA15G01510.1				O	katanin p60
MSTRG.32165	MR_inoculated	MS_control	4.74676	12.8194	4.90385e-10	7.65889e-08	Up	Yes	XP_014491947.1		3847.GLYMA01G32750.1	LTP1	GO:0005575,GO:0005618,GO:0005623,GO:0009505,GO:0030312,GO:0044464,GO:0071944		T	Plant non-specific lipid-transfer proteins transfer phospholipids as well as galactolipids across membranes. May play a role in wax or cutin deposition in the cell walls of expanding epidermal cells and certain secretory tissues (By similarity)
MSTRG.26996	MR_inoculated	MS_control	-4.77642	8.0921	5.16703e-10	8.00094e-08	Down	Yes	XP_014521795.1		3847.GLYMA09G09310.1	CIPK1	GO:0005575,GO:0005623,GO:0005886,GO:0006950,GO:0006970,GO:0008150,GO:0009628,GO:0009651,GO:0009719,GO:0009725,GO:0009737,GO:0010033,GO:0016020,GO:0033993,GO:0042221,GO:0044464,GO:0050896,GO:0071944,GO:0097305,GO:1901700	K07198	T	Cbl-interacting protein kinase
MSTRG.17107	MR_inoculated	MS_control	-4.78557	7.34039	5.74888e-10	8.78197e-08	Down	Yes	XP_014508702.1		3847.GLYMA17G02371.1	PPDK	GO:0005575,GO:0005622,GO:0005623,GO:0005634,GO:0005737,GO:0005829,GO:0009507,GO:0009532,GO:0009536,GO:0009570,GO:0043226,GO:0043227,GO:0043229,GO:0043231,GO:0044422,GO:0044424,GO:0044434,GO:0044435,GO:0044444,GO:0044446,GO:0044464	K01006	C	Pyruvate phosphate dikinase
MSTRG.7357	MR_inoculated	MS_control	-4.78349	7.37546	5.76837e-10	8.78197e-08	Down	Yes	XP_014498013.1		3847.GLYMA08G28460.1	PDH	GO:0003674,GO:0003824,GO:0004657,GO:0005575,GO:0005622,GO:0005623,GO:0005737,GO:0005739,GO:0006082,GO:0006520,GO:0006560,GO:0006562,GO:0006807,GO:0006950,GO:0006952,GO:0006970,GO:0006979,GO:0008150,GO:0008152,GO:0009056,GO:0009063,GO:0009064,GO:0009065,GO:0009414,GO:0009415,GO:0009607,GO:0009617,GO:0009628,GO:0009987,GO:0010035,GO:0016054,GO:0016491,GO:0016645,GO:0019752,GO:0042221,GO:0042742,GO:…	K00318	E	Proline dehydrogenase
MSTRG.15455	MR_inoculated	MS_control	5.05307	4.9402	6.5551e-10	9.89656e-08	Up	Yes	XP_014507964.1		3847.GLYMA17G13820.1			K13448	T	calcium-binding protein
MSTRG.15188	MR_inoculated	MS_control	-4.96299	5.32097	6.73266e-10	1.00714e-07	Down	Yes	XP_022639108.1		3847.GLYMA05G06090.1		GO:0003674,GO:0003824,GO:0004445,GO:0005975,GO:0006066,GO:0006793,GO:0006796,GO:0007275,GO:0008150,GO:0008152,GO:0009056,GO:0009719,GO:0009725,GO:0009737,GO:0009791,GO:0009845,GO:0009987,GO:0010033,GO:0016311,GO:0016787,GO:0016788,GO:0016791,GO:0019637,GO:0019751,GO:0032501,GO:0032502,GO:0032957,GO:0033993,GO:0042221,GO:0042578,GO:0043647,GO:0044237,GO:0044238,GO:0044262,GO:0044281,GO:0044282,GO:…		U	type I inositol-1,4,5-trisphosphate 5-phosphatase
MSTRG.27464	MR_inoculated	MS_control	4.75101	7.50653	6.78206e-10	1.00714e-07	Up	Yes	XP_014522198.1		3847.GLYMA08G45590.1				O	trypsin inhibitor
MSTRG.14420	MR_inoculated	MS_control	-5.15436	4.57448	7.02989e-10	1.03545e-07	Down	Yes	XP_022638882.1		3847.GLYMA07G35690.1	OSI_33516			S	zinc finger protein
MSTRG.982	MR_inoculated	MS_control	4.70256	8.57885	7.66042e-10	1.11922e-07	Up	Yes	XP_014517585.1		3847.GLYMA09G29900.1		GO:0005575,GO:0005911,GO:0009506,GO:0030054,GO:0055044	K01580	E	glutamate
MSTRG.7179	MR_inoculated	MS_control	4.68033	9.57922	8.13393e-10	1.1789e-07	Up	Yes	XP_014497686.2		3847.GLYMA18G49570.1		GO:0005575,GO:0005618,GO:0005623,GO:0016020,GO:0030312,GO:0044464,GO:0071944		G	Pollen allergen
MSTRG.366	MR_inoculated	MS_control	-5.15633	4.46297	8.4671e-10	1.21745e-07	Down	Yes	XP_014517181.1		3847.GLYMA13G05270.1		GO:0001071,GO:0003674,GO:0003676,GO:0003677,GO:0003700,GO:0005488,GO:0005575,GO:0005622,GO:0005623,GO:0005634,GO:0006355,GO:0008150,GO:0009889,GO:0010468,GO:0010556,GO:0019219,GO:0019222,GO:0031323,GO:0031326,GO:0043226,GO:0043227,GO:0043229,GO:0043231,GO:0043565,GO:0044424,GO:0044464,GO:0050789,GO:0050794,GO:0051171,GO:0051252,GO:0060255,GO:0065007,GO:0080090,GO:0097159,GO:1901363,GO:2000112,GO:…	K09338	K	homeobox-leucine zipper protein
MSTRG.21598	MR_inoculated	MS_control	4.71869	7.37374	8.57144e-10	1.22275e-07	Up	Yes	XP_014515809.1		3847.GLYMA08G21420.1				S	stem 28 kDa
MSTRG.5772	MR_inoculated	MS_control	-4.68609	8.04877	9.19275e-10	1.30063e-07	Down	Yes	XP_014496046.1		3847.GLYMA11G35030.1	PIP1	GO:0003674,GO:0005215,GO:0005372,GO:0005575,GO:0005623,GO:0005886,GO:0005911,GO:0006810,GO:0006833,GO:0008150,GO:0009506,GO:0009987,GO:0015250,GO:0015267,GO:0016020,GO:0022803,GO:0022838,GO:0022857,GO:0022891,GO:0022892,GO:0030054,GO:0042044,GO:0044464,GO:0044699,GO:0044763,GO:0044765,GO:0051179,GO:0051234,GO:0055044,GO:0055085,GO:0071944	K09872,K09873	G	Aquaporin
MSTRG.29018	MR_inoculated	MS_control	4.7229	7.02111	9.26101e-10	1.30063e-07	Up	Yes
MSTRG.8803	MR_inoculated	MS_control	4.7914	6.02983	9.70354e-10	1.3523e-07	Up	Yes	XP_014502330.1		3847.GLYMA06G09830.1		GO:0005575,GO:0005576,GO:0005618,GO:0005623,GO:0009505,GO:0030312,GO:0044464,GO:0048046,GO:0071944		O	aspartic proteinase
MSTRG.1271	MR_inoculated	MS_control	-4.73569	6.57822	1.01632e-09	1.40555e-07	Down	Yes	XP_014517621.1		3847.GLYMA13G05880.1	OSI_20596	GO:0007623,GO:0008150,GO:0048511
MSTRG.31659	MR_inoculated	MS_control	-5.09445	4.5167	1.03072e-09	1.40798e-07	Down	Yes	XP_014491244.1		3847.GLYMA19G25680.1		GO:0000325,GO:0003674,GO:0005215,GO:0005575,GO:0005622,GO:0005623,GO:0005737,GO:0005773,GO:0005774,GO:0006810,GO:0006811,GO:0006812,GO:0006818,GO:0006820,GO:0006821,GO:0008150,GO:0008324,GO:0008509,GO:0009671,GO:0009705,GO:0009987,GO:0010035,GO:0010167,GO:0015075,GO:0015077,GO:0015078,GO:0015103,GO:0015112,GO:0015291,GO:0015293,GO:0015294,GO:0015296,GO:0015672,GO:0015698,GO:0015706,GO:0015992,GO:…	K05016	P	chloride channel
MSTRG.3082	MR_inoculated	MS_control	4.76272	6.20553	1.03362e-09	1.40798e-07	Up	Yes
MSTRG.17984	MR_inoculated	MS_control	-4.97109	4.86019	1.12134e-09	1.51074e-07	Down	Yes	XP_014514802.1		3847.GLYMA10G00720.1		GO:0003674,GO:0005215,GO:0005575,GO:0005622,GO:0005623,GO:0005737,GO:0005794,GO:0005802,GO:0005886,GO:0006810,GO:0006811,GO:0006817,GO:0006820,GO:0006950,GO:0007154,GO:0008150,GO:0008509,GO:0009267,GO:0009605,GO:0009987,GO:0009991,GO:0015075,GO:0015103,GO:0015114,GO:0015698,GO:0016020,GO:0016036,GO:0022857,GO:0022891,GO:0022892,GO:0031667,GO:0031668,GO:0031669,GO:0033554,GO:0034220,GO:0035435,GO:…		P	phosphate transporter
MSTRG.13989	MR_inoculated	MS_control	4.86345	5.33603	1.12574e-09	1.51074e-07	Up	Yes	XP_014507636.1		3847.GLYMA02G15430.1	OSI_13656	GO:0000003,GO:0003006,GO:0005575,GO:0005622,GO:0005623,GO:0005737,GO:0006950,GO:0006952,GO:0007275,GO:0008150,GO:0009507,GO:0009536,GO:0009607,GO:0009620,GO:0009790,GO:0009791,GO:0009793,GO:0010154,GO:0022414,GO:0032501,GO:0032502,GO:0043226,GO:0043227,GO:0043229,GO:0043231,GO:0044424,GO:0044444,GO:0044464,GO:0044699,GO:0044707,GO:0044767,GO:0048316,GO:0048608,GO:0048731,GO:0048856,GO:0050832,GO:…
MSTRG.22045	MR_inoculated	MS_control	4.94899	4.9169	1.15236e-09	1.52357e-07	Up	Yes	XP_014515921.1		3847.GLYMA07G07890.1
MSTRG.5422	MR_inoculated	MS_control	-4.84605	5.4205	1.15456e-09	1.52357e-07	Down	Yes	XP_014495650.1		3847.GLYMA03G37490.1				O	DNAj (Hsp40) homolog, subfamily B, member
MSTRG.30577	MR_inoculated	MS_control	4.94655	4.91454	1.17048e-09	1.52357e-07	Up	Yes
MSTRG.7532	MR_inoculated	MS_control	-4.70961	6.61347	1.17133e-09	1.52357e-07	Down	Yes	XP_022635828.1		3847.GLYMA02G09801.1		GO:0005575,GO:0005622,GO:0005623,GO:0005737,GO:0005829,GO:0006996,GO:0008150,GO:0009314,GO:0009416,GO:0009628,GO:0009637,GO:0009657,GO:0009658,GO:0009902,GO:0009903,GO:0009904,GO:0009987,GO:0016043,GO:0044424,GO:0044444,GO:0044464,GO:0044699,GO:0044763,GO:0050896,GO:0051179,GO:0051234,GO:0051640,GO:0051641,GO:0051644,GO:0051649,GO:0051656,GO:0051667,GO:0071840		S	protein PLASTID MOVEMENT IMPAIRED
MSTRG.27213	MR_inoculated	MS_control	-4.75447	6.084	1.17734e-09	1.52357e-07	Down	Yes	XP_022631954.1		3847.GLYMA12G33970.1	AT2G42750	GO:0005575,GO:0005622,GO:0005623,GO:0005737,GO:0009507,GO:0009536,GO:0043226,GO:0043227,GO:0043229,GO:0043231,GO:0044424,GO:0044444,GO:0044464		O	DNAJ heat shock N-terminal domain-containing protein
MSTRG.20585	MR_inoculated	MS_control	4.6815	6.78921	1.29246e-09	1.6562e-07	Up	Yes	XP_014510849.1		3847.GLYMA10G06620.1				K	RNA recognition motif. (a.k.a. RRM, RBD, or RNP domain)
MSTRG.18029	MR_inoculated	MS_control	-4.62195	8.49031	1.29812e-09	1.6562e-07	Down	Yes	XP_014512466.1		3847.GLYMA20G21520.1	PGR5	GO:0003674,GO:0005575,GO:0005622,GO:0005623,GO:0005737,GO:0006091,GO:0006950,GO:0008150,GO:0008152,GO:0009055,GO:0009314,GO:0009414,GO:0009415,GO:0009416,GO:0009507,GO:0009534,GO:0009535,GO:0009536,GO:0009579,GO:0009628,GO:0009642,GO:0009644,GO:0009767,GO:0009773,GO:0009987,GO:0010035,GO:0010117,GO:0015979,GO:0016020,GO:0019684,GO:0022900,GO:0031976,GO:0031984,GO:0034357,GO:0042221,GO:0042651,GO:…		S	proton gradient regulation 5
MSTRG.16291	MR_inoculated	MS_control	4.82159	5.39795	1.33405e-09	1.69013e-07	Up	Yes	XP_014505698.1		3847.GLYMA05G08230.1	AKT1	GO:0003674,GO:0005215,GO:0005216,GO:0005242,GO:0005244,GO:0005249,GO:0005261,GO:0005267,GO:0005575,GO:0005623,GO:0005886,GO:0006810,GO:0006811,GO:0006812,GO:0006813,GO:0006950,GO:0006970,GO:0007275,GO:0008150,GO:0008324,GO:0008544,GO:0009414,GO:0009415,GO:0009628,GO:0009651,GO:0009653,GO:0009888,GO:0009913,GO:0009987,GO:0010015,GO:0010035,GO:0010053,GO:0010054,GO:0010107,GO:0010119,GO:0015075,GO:…		P	Potassium channel
MSTRG.16984	MR_inoculated	MS_control	4.673	6.55942	1.49054e-09	1.87529e-07	Up	Yes	XP_014506982.1		3847.GLYMA17G03365.1				S	Pathogenesis-related protein Bet v I family
MSTRG.29954	MR_inoculated	MS_control	4.83208	5.19589	1.53861e-09	1.92241e-07	Up	Yes	XP_014489588.1		3847.GLYMA08G47070.1		GO:0006792,GO:0006950,GO:0007154,GO:0008150,GO:0009267,GO:0009605,GO:0009987,GO:0009991,GO:0010438,GO:0031667,GO:0031668,GO:0031669,GO:0033554,GO:0042594,GO:0044699,GO:0044763,GO:0050789,GO:0050896,GO:0051716,GO:0065007,GO:0071496		S	male sterility MS5 family protein
MSTRG.30776	MR_inoculated	MS_control	5.02671	4.45247	1.56756e-09	1.94516e-07	Up	Yes
MSTRG.32338	MR_inoculated	MS_control	4.61825	7.37887	1.59408e-09	1.95564e-07	Up	Yes	XP_014492110.2		3847.GLYMA03G40770.1				G	wound-induced protein
MSTRG.30698	MR_inoculated	MS_control	4.62004	7.325	1.59759e-09	1.95564e-07	Up	Yes	XP_014490351.1		3847.GLYMA03G04370.2				T	Plant non-specific lipid-transfer proteins transfer phospholipids as well as galactolipids across membranes. May play a role in wax or cutin deposition in the cell walls of expanding epidermal cells and certain secretory tissues (By similarity)
MSTRG.17993	MR_inoculated	MS_control	4.56353	9.5627	1.71573e-09	2.08617e-07	Up	Yes	XP_014512853.1		4538.ORGLA04G0033400.1
MSTRG.17825	MR_inoculated	MS_control	4.68331	6.10187	1.74623e-09	2.10909e-07	Up	Yes	NP_001304076.1		3847.GLYMA08G02130.1	ACS	GO:0003674,GO:0003824,GO:0006082,GO:0006520,GO:0006807,GO:0006950,GO:0006979,GO:0008150,GO:0008152,GO:0008652,GO:0009058,GO:0009605,GO:0009611,GO:0009612,GO:0009628,GO:0009692,GO:0009693,GO:0009719,GO:0009725,GO:0009733,GO:0009753,GO:0009987,GO:0010033,GO:0010035,GO:0010038,GO:0010039,GO:0016053,GO:0016829,GO:0016846,GO:0016847,GO:0018871,GO:0019752,GO:0032787,GO:0042218,GO:0042221,GO:0043436,GO:…	K01762	E	1-aminocyclopropane-1-carboxylate synthase
MSTRG.21001	MR_inoculated	MS_control	4.86812	4.91219	1.7591e-09	2.11057e-07	Up	Yes	XP_014512882.1		3847.GLYMA10G41260.1
MSTRG.25482	MR_inoculated	MS_control	-4.62795	6.77068	1.80577e-09	2.15231e-07	Down	Yes	XP_014521445.1		3847.GLYMA11G05320.1				S	BTB POZ domain-containing protein
MSTRG.20694	MR_inoculated	MS_control	-5.10869	4.15943	1.86853e-09	2.21256e-07	Down	Yes	XP_014512233.1		3847.GLYMA20G29850.2	O7	GO:0000003,GO:0003006,GO:0003674,GO:0003824,GO:0005575,GO:0005576,GO:0005622,GO:0005623,GO:0005737,GO:0005911,GO:0006082,GO:0006950,GO:0006952,GO:0007275,GO:0008150,GO:0008152,GO:0009056,GO:0009506,GO:0009507,GO:0009532,GO:0009536,GO:0009570,GO:0009607,GO:0009620,GO:0009791,GO:0009987,GO:0010029,GO:0010030,GO:0010035,GO:0010038,GO:0010154,GO:0010214,GO:0016054,GO:0016874,GO:0016877,GO:0016878,GO:…		I	synthetase
MSTRG.3267	MR_inoculated	MS_control	4.78706	5.15265	2.04999e-09	2.41166e-07	Up	Yes
MSTRG.6644	MR_inoculated	MS_control	4.72666	5.44759	2.15672e-09	2.52085e-07	Up	Yes	XP_014497481.1		3847.GLYMA19G27440.2
MSTRG.27885	MR_inoculated	MS_control	-4.57592	7.20012	2.17641e-09	2.52757e-07	Down	Yes	XP_022632156.1		3847.GLYMA08G24280.1		GO:0005575,GO:0005622,GO:0005623,GO:0005737,GO:0006412,GO:0006413,GO:0008150,GO:0008152,GO:0009058,GO:0009059,GO:0009507,GO:0009526,GO:0009532,GO:0009536,GO:0009570,GO:0009941,GO:0009987,GO:0010467,GO:0019538,GO:0031967,GO:0031975,GO:0034645,GO:0043170,GO:0043226,GO:0043227,GO:0043229,GO:0043231,GO:0044237,GO:0044238,GO:0044249,GO:0044260,GO:0044267,GO:0044422,GO:0044424,GO:0044434,GO:0044435,GO:…		G	Complex I intermediate-associated protein 30 (CIA30)
MSTRG.19542	MR_inoculated	MS_control	4.80802	4.85448	2.57745e-09	2.97425e-07	Up	Yes	XP_014512061.1		3847.GLYMA02G02000.2		GO:0005575,GO:0005618,GO:0005623,GO:0030312,GO:0044464,GO:0071944	K01051	G	pectinesterase
MSTRG.5627	MR_inoculated	MS_control	4.5106	8.41945	2.62225e-09	3.00679e-07	Up	Yes	XP_014496192.1		3847.GLYMA03G39210.1				U	importin subunit alpha
MSTRG.31913	MR_inoculated	MS_control	-4.50753	8.32386	2.71948e-09	3.09547e-07	Down	Yes	XP_014491726.1		3847.GLYMA12G12660.1
MSTRG.10160	MR_inoculated	MS_control	4.60839	6.0842	2.73376e-09	3.09547e-07	Up	Yes	XP_014499981.1		3847.GLYMA12G17710.1
MSTRG.6183	MR_inoculated	MS_control	4.78741	4.83471	2.93714e-09	3.30386e-07	Up	Yes	XP_014497458.1		3847.GLYMA07G38530.1				H	Dienelactone hydrolase family protein
MSTRG.21291	MR_inoculated	MS_control	4.57015	6.39962	2.95427e-09	3.30386e-07	Up	Yes	XP_014513270.2		3847.GLYMA20G38560.1		GO:0005575,GO:0005622,GO:0005623,GO:0005634,GO:0005694,GO:0043226,GO:0043227,GO:0043228,GO:0043229,GO:0043231,GO:0043232,GO:0044424,GO:0044464	K01859	G	Catalyzes the intramolecular cyclization of bicyclic chalcones into tricyclic (S)-flavanones. Responsible for the isomerization of 4,2',4',6'-tetrahydroxychalcone (also termed chalcone) into naringenin
MSTRG.21900	MR_inoculated	MS_control	-4.49186	8.19964	3.0451e-09	3.38454e-07	Down	Yes	XP_014515389.1		3847.GLYMA16G03140.1		GO:0005575,GO:0005622,GO:0005623,GO:0005737,GO:0009507,GO:0009536,GO:0043226,GO:0043227,GO:0043229,GO:0043231,GO:0044424,GO:0044444,GO:0044464		S	Protein of unknown function (DUF2996)
MSTRG.10056	MR_inoculated	MS_control	4.88667	4.423	3.20223e-09	3.53749e-07	Up	Yes	XP_014500646.2		3847.GLYMA04G17650.1			K13448	T	calcium-binding protein
MSTRG.33461	MR_inoculated	MS_control	4.83685	4.5647	3.28761e-09	3.6098e-07	Up	Yes
MSTRG.10391	MR_inoculated	MS_control	4.90733	4.33781	3.33724e-09	3.64221e-07	Up	Yes	XP_014499962.1		3847.GLYMA08G18640.1				O	glutathione Stransferase
MSTRG.17640	MR_inoculated	MS_control	-4.45644	8.37652	3.72449e-09	4.04051e-07	Down	Yes	XP_022638543.1		3847.GLYMA08G13130.1		GO:0005575,GO:0005622,GO:0005623,GO:0005634,GO:0005737,GO:0005829,GO:0043226,GO:0043227,GO:0043229,GO:0043231,GO:0044424,GO:0044444,GO:0044464	K20102	L	YT521-B-like family domain containing protein, expressed
MSTRG.30102	MR_inoculated	MS_control	-4.48021	7.32008	3.80808e-09	4.09977e-07	Down	Yes	XP_014489780.1		3847.GLYMA03G28600.1				S	Haloacid dehalogenase-like hydrolase domain-containing protein
MSTRG.24524	MR_inoculated	MS_control	-4.48143	7.26851	3.82437e-09	4.09977e-07	Down	Yes	XP_014517823.1		3847.GLYMA13G31290.1		GO:0006810,GO:0006811,GO:0006817,GO:0006820,GO:0006950,GO:0007154,GO:0008150,GO:0009267,GO:0009605,GO:0009987,GO:0009991,GO:0015698,GO:0016036,GO:0031667,GO:0031668,GO:0031669,GO:0033554,GO:0042592,GO:0042594,GO:0044699,GO:0044763,GO:0044765,GO:0048878,GO:0050801,GO:0050896,GO:0051179,GO:0051234,GO:0051716,GO:0055062,GO:0055081,GO:0065007,GO:0065008,GO:0071496,GO:0072506	K10581	O	ubiquitin-conjugating enzyme E2
MSTRG.3581	MR_inoculated	MS_control	-4.56973	5.87722	3.89618e-09	4.15219e-07	Down	Yes	XP_014494220.1		3847.GLYMA12G10030.2		GO:0005575,GO:0005622,GO:0005623,GO:0005634,GO:0043226,GO:0043227,GO:0043229,GO:0043231,GO:0044424,GO:0044464		K	BEL1-like homeodomain protein
MSTRG.22448	MR_inoculated	MS_control	-4.53954	6.14448	4.012e-09	4.25061e-07	Down	Yes	XP_014516701.1		3847.GLYMA01G25890.1		GO:0005575,GO:0005622,GO:0005623,GO:0005634,GO:0005886,GO:0016020,GO:0043226,GO:0043227,GO:0043229,GO:0043231,GO:0044424,GO:0044464,GO:0071944	K14638	E	transporter
MSTRG.9513	MR_inoculated	MS_control	-4.60594	5.49955	4.10031e-09	4.31892e-07	Down	Yes	XP_014502294.1		3847.GLYMA04G03410.2				F	Cytosolic purine
MSTRG.17734	MR_inoculated	MS_control	4.4654	7.05887	4.42198e-09	4.63081e-07	Up	Yes	XP_022640042.1		3847.GLYMA05G38260.1				Q	Dehydrogenase
MSTRG.7899	MR_inoculated	MS_control	-4.83226	4.36985	4.56562e-09	4.75376e-07	Down	Yes	XP_014500685.2		3847.GLYMA09G08440.1
MSTRG.3223	MR_inoculated	MS_control	4.61599	5.15066	5.16519e-09	5.3473e-07	Up	Yes	XP_022634152.1		3847.GLYMA12G06406.1				K	MYB family transcription factor
MSTRG.3456	MR_inoculated	MS_control	-4.7283	4.62716	5.22991e-09	5.38354e-07	Down	Yes	XP_014493277.1		3847.GLYMA12G08660.1				S	Zinc finger protein
MSTRG.23417	MR_inoculated	MS_control	4.41911	7.49202	5.31799e-09	5.44327e-07	Up	Yes	XP_022642300.1		3847.GLYMA08G45210.1		GO:0003674,GO:0003824,GO:0004645,GO:0005575,GO:0005622,GO:0005623,GO:0005737,GO:0005829,GO:0006950,GO:0008150,GO:0008152,GO:0009414,GO:0009415,GO:0009507,GO:0009536,GO:0009628,GO:0010035,GO:0010038,GO:0016740,GO:0016757,GO:0016758,GO:0042221,GO:0043226,GO:0043227,GO:0043229,GO:0043231,GO:0044424,GO:0044444,GO:0044464,GO:0046686,GO:0050896,GO:1901700	K00688	G	Phosphorylase is an important allosteric enzyme in carbohydrate metabolism. Enzymes from different sources differ in their regulatory mechanisms and in their natural substrates. However, all known phosphorylases share catalytic and structural properties (By similarity)
MSTRG.3092	MR_inoculated	MS_control	4.5465	5.48294	5.7289e-09	5.82439e-07	Up	Yes	XP_022642874.1		3847.GLYMA11G13270.2		GO:0003674,GO:0003824,GO:0004553,GO:0004568,GO:0008150,GO:0008152,GO:0016787,GO:0016798	K01183	G	Chitinase class I
MSTRG.11770	MR_inoculated	MS_control	-4.36396	11.1541	5.75463e-09	5.82439e-07	Down	Yes	XP_014504832.1		3847.GLYMA14G07270.1	RCA	GO:0000166,GO:0001882,GO:0001883,GO:0003674,GO:0005488,GO:0005524,GO:0005575,GO:0005576,GO:0005618,GO:0005622,GO:0005623,GO:0005634,GO:0005737,GO:0006950,GO:0006952,GO:0007275,GO:0007568,GO:0008047,GO:0008150,GO:0009266,GO:0009314,GO:0009409,GO:0009416,GO:0009507,GO:0009526,GO:0009532,GO:0009534,GO:0009535,GO:0009536,GO:0009570,GO:0009579,GO:0009607,GO:0009617,GO:0009628,GO:0009719,GO:0009725,GO:…		O	Ribulose bisphosphate carboxylase oxygenase activase
MSTRG.15618	MR_inoculated	MS_control	-4.53801	5.51205	5.9466e-09	5.98525e-07	Down	Yes	XP_014505985.1		3847.GLYMA05G02150.2		GO:0005575,GO:0005623,GO:0005886,GO:0016020,GO:0044464,GO:0071944		T	Serine threonine-protein kinase
MSTRG.11054	MR_inoculated	MS_control	-4.39779	7.56478	6.02304e-09	6.0287e-07	Down	Yes	XP_014505333.1		3847.GLYMA02G47960.1	LHCA3	GO:0005575,GO:0005622,GO:0005623,GO:0005737,GO:0009507,GO:0009532,GO:0009534,GO:0009535,GO:0009536,GO:0009570,GO:0009579,GO:0010287,GO:0016020,GO:0031976,GO:0031984,GO:0034357,GO:0042651,GO:0043226,GO:0043227,GO:0043229,GO:0043231,GO:0044422,GO:0044424,GO:0044434,GO:0044435,GO:0044436,GO:0044444,GO:0044446,GO:0044464,GO:0055035	K08909	S	Chlorophyll a-b binding protein
MSTRG.9041	MR_inoculated	MS_control	4.45315	6.28779	6.17508e-09	6.14692e-07	Up	Yes	XP_014500779.1		3847.GLYMA04G07480.1				Q	2OG-Fe(II) oxygenase superfamily
MSTRG.7192	MR_inoculated	MS_control	-4.45134	6.30578	6.26493e-09	6.20228e-07	Down	Yes	NP_001304233.1		3847.GLYMA13G05441.1	SS2	GO:0003674,GO:0003824,GO:0005575,GO:0005622,GO:0005623,GO:0005737,GO:0008150,GO:0008152,GO:0009011,GO:0009058,GO:0009059,GO:0009501,GO:0009507,GO:0009536,GO:0010021,GO:0016740,GO:0016757,GO:0016758,GO:0043170,GO:0043226,GO:0043227,GO:0043229,GO:0043231,GO:0044424,GO:0044444,GO:0044464,GO:0046527,GO:0071704,GO:1901135,GO:1901137,GO:1901576,GO:2000896	K00703	M	starch synthase
MSTRG.20989	MR_inoculated	MS_control	4.77181	4.31303	6.59471e-09	6.49328e-07	Up	Yes	XP_014512844.1		3847.GLYMA10G41130.1
MSTRG.28518	MR_inoculated	MS_control	4.41279	6.73894	6.67976e-09	6.54147e-07	Up	Yes	XP_014523272.1		3847.GLYMA04G43480.1		GO:0005575,GO:0005576		I	GDSL esterase lipase
MSTRG.3756	MR_inoculated	MS_control	4.51176	5.52517	6.75189e-09	6.57656e-07	Up	Yes	XP_014493444.1		3847.GLYMA12G12800.1				I	alpha/beta hydrolase fold
MSTRG.30064	MR_inoculated	MS_control	4.69585	4.5159	7.07153e-09	6.85106e-07	Up	Yes	XP_014489691.2		3847.GLYMA10G06140.1		GO:0005575,GO:0005576,GO:0005618,GO:0005623,GO:0008150,GO:0008152,GO:0009056,GO:0009987,GO:0016998,GO:0030312,GO:0043170,GO:0044036,GO:0044237,GO:0044248,GO:0044260,GO:0044464,GO:0044699,GO:0044763,GO:0048046,GO:0071554,GO:0071704,GO:0071840,GO:0071944	K08235	G	Xyloglucan endotransglucosylase hydrolase protein
MSTRG.58	MR_inoculated	MS_control	4.39484	6.88961	7.11529e-09	6.8568e-07	Up	Yes
MSTRG.11344	MR_inoculated	MS_control	4.85032	4.04714	7.23443e-09	6.93472e-07	Up	Yes
MSTRG.11596	MR_inoculated	MS_control	4.5309	5.26028	7.45268e-09	7.10632e-07	Up	Yes
MSTRG.29377	MR_inoculated	MS_control	-4.38529	6.8663	7.6156e-09	7.22365e-07	Down	Yes	XP_014524137.1		3847.GLYMA07G05820.1				Q	cytochrome P450
MSTRG.23067	MR_inoculated	MS_control	-4.49249	5.50581	7.71496e-09	7.26107e-07	Down	Yes	XP_014518338.1		3847.GLYMA06G13820.1		GO:0000003,GO:0003006,GO:0003674,GO:0005215,GO:0005575,GO:0005623,GO:0005886,GO:0006810,GO:0007275,GO:0008150,GO:0009607,GO:0009624,GO:0009791,GO:0009987,GO:0010154,GO:0015603,GO:0015688,GO:0016020,GO:0022414,GO:0022857,GO:0032501,GO:0032502,GO:0044464,GO:0044699,GO:0044707,GO:0044763,GO:0044765,GO:0048316,GO:0048608,GO:0048731,GO:0048856,GO:0050896,GO:0051179,GO:0051234,GO:0051704,GO:0051707,GO:…		P	metal-nicotianamine transporter
MSTRG.20172	MR_inoculated	MS_control	-4.36181	7.40969	7.7352e-09	7.26107e-07	Down	Yes	XP_014513716.1		3847.GLYMA01G44491.1		GO:0005575,GO:0005622,GO:0005623,GO:0005634,GO:0006355,GO:0008150,GO:0009889,GO:0010468,GO:0010556,GO:0019219,GO:0019222,GO:0031323,GO:0031326,GO:0040007,GO:0043226,GO:0043227,GO:0043229,GO:0043231,GO:0044424,GO:0044464,GO:0050789,GO:0050794,GO:0051171,GO:0051252,GO:0060255,GO:0065007,GO:0080090,GO:2000112,GO:2001141		S	Plus-3 domain
MSTRG.10300	MR_inoculated	MS_control	-4.47489	5.5952	8.01135e-09	7.48153e-07	Down	Yes	XP_014501491.1		3847.GLYMA15G41610.1				S	Uncharacterized conserved protein (DUF2358)
MSTRG.20058	MR_inoculated	MS_control	-4.39367	6.49562	8.14921e-09	7.57124e-07	Down	Yes	XP_022640988.1		3847.GLYMA20G35980.1		GO:0000003,GO:0003006,GO:0003674,GO:0005215,GO:0005575,GO:0005623,GO:0005886,GO:0006810,GO:0007275,GO:0008150,GO:0009791,GO:0009987,GO:0010035,GO:0010038,GO:0010039,GO:0010154,GO:0015603,GO:0015688,GO:0016020,GO:0022414,GO:0022857,GO:0032501,GO:0032502,GO:0042221,GO:0044464,GO:0044699,GO:0044707,GO:0044763,GO:0044765,GO:0048316,GO:0048608,GO:0048731,GO:0048856,GO:0050896,GO:0051179,GO:0051234,GO:…		P	transporter
MSTRG.17416	MR_inoculated	MS_control	-4.33758	7.69352	8.5438e-09	7.89734e-07	Down	Yes	XP_014509333.1		3847.GLYMA07G39180.5
MSTRG.25750	MR_inoculated	MS_control	-4.34779	7.28408	8.64407e-09	7.94947e-07	Down	Yes	XP_014521115.1		3847.GLYMA01G37370.1				S	salt tolerance-like protein At1g78600-like
MSTRG.3575	MR_inoculated	MS_control	-4.62352	4.60398	9.13995e-09	8.32153e-07	Down	Yes	XP_014520527.1		3847.GLYMA12G10100.1		GO:0005575,GO:0005622,GO:0005623,GO:0005737,GO:0009507,GO:0009536,GO:0043226,GO:0043227,GO:0043229,GO:0043231,GO:0044424,GO:0044444,GO:0044464		S	protein FAF-like, chloroplastic-like
MSTRG.18968	MR_inoculated	MS_control	-4.3636	6.69112	9.1405e-09	8.32153e-07	Down	Yes	XP_022640402.1		3847.GLYMA07G16400.1	OSI_20201			D, Z	Regulator of chromosome condensation
MSTRG.27015	MR_inoculated	MS_control	4.80931	4.00797	9.342e-09	8.46245e-07	Up	Yes	XP_014521811.1		3847.GLYMA18G41640.2			K14686	P	copper transporter
MSTRG.30164	MR_inoculated	MS_control	-4.59817	4.65279	9.786e-09	8.82054e-07	Down	Yes	XP_014489838.1		3847.GLYMA08G23700.1		GO:0001071,GO:0003674,GO:0003700,GO:0005575,GO:0005622,GO:0005623,GO:0005634,GO:0005737,GO:0006355,GO:0007154,GO:0007165,GO:0007275,GO:0008150,GO:0009314,GO:0009416,GO:0009628,GO:0009637,GO:0009639,GO:0009640,GO:0009719,GO:0009785,GO:0009791,GO:0009889,GO:0009890,GO:0009892,GO:0009909,GO:0009987,GO:0010017,GO:0010033,GO:0010200,GO:0010243,GO:0010468,GO:0010556,GO:0010558,GO:0010605,GO:0010629,GO:…		S	Inherit from euNOG: B-box zinc finger family protein
MSTRG.18411	MR_inoculated	MS_control	4.80004	3.99912	9.89699e-09	8.87642e-07	Up	Yes
MSTRG.19716	MR_inoculated	MS_control	4.60315	4.58555	1.02607e-08	9.15732e-07	Up	Yes	XP_014513057.1		3847.GLYMA20G22840.1
MSTRG.8345	MR_inoculated	MS_control	4.46106	5.32192	1.04233e-08	9.25678e-07	Up	Yes
MSTRG.25377	MR_inoculated	MS_control	4.54216	4.79947	1.09212e-08	9.65169e-07	Up	Yes	XP_014520146.1		3847.GLYMA01G41190.1	CT-BMY	GO:0000023,GO:0000024,GO:0000272,GO:0003674,GO:0003824,GO:0004553,GO:0005575,GO:0005622,GO:0005623,GO:0005737,GO:0005975,GO:0005976,GO:0005982,GO:0005983,GO:0005984,GO:0006073,GO:0006950,GO:0008150,GO:0008152,GO:0009056,GO:0009057,GO:0009058,GO:0009251,GO:0009266,GO:0009311,GO:0009312,GO:0009409,GO:0009507,GO:0009532,GO:0009536,GO:0009570,GO:0009628,GO:0009987,GO:0016051,GO:0016052,GO:0016160,GO:…	K01177	G	beta-amylase
MSTRG.1747	MR_inoculated	MS_control	-4.28054	7.99242	1.16323e-08	1.02303e-06	Down	Yes	XP_014511585.1		3847.GLYMA05G31670.1		GO:0003674,GO:0005215,GO:0005575,GO:0005622,GO:0005623,GO:0005737,GO:0006810,GO:0008150,GO:0009507,GO:0009526,GO:0009536,GO:0009941,GO:0031967,GO:0031975,GO:0043226,GO:0043227,GO:0043229,GO:0043231,GO:0044422,GO:0044424,GO:0044434,GO:0044435,GO:0044444,GO:0044446,GO:0044464,GO:0051179,GO:0051234		S	ABC1 family
MSTRG.27314	MR_inoculated	MS_control	-4.40312	5.62573	1.18017e-08	1.03291e-06	Down	Yes	XP_014522087.2		3847.GLYMA06G47470.1		GO:0005575,GO:0016020		G	hexose carrier protein
MSTRG.8646	MR_inoculated	MS_control	-4.375	5.77845	1.2661e-08	1.10257e-06	Down	Yes	XP_022636384.1		3847.GLYMA04G43110.2		GO:0005575,GO:0005623,GO:0005886,GO:0016020,GO:0044464,GO:0071944		S	Camphor resistance CrcB family protein
MSTRG.10573	MR_inoculated	MS_control	4.54106	4.66883	1.27243e-08	1.10257e-06	Up	Yes	XP_014499508.1		3847.GLYMA15G02440.1				T	Leucine-rich repeat receptor-like protein kinase
MSTRG.6255	MR_inoculated	MS_control	-4.31258	6.59741	1.27803e-08	1.10257e-06	Down	Yes	XP_014497922.1		3847.GLYMA13G41130.1		GO:0005575,GO:0005622,GO:0005623,GO:0005737,GO:0005886,GO:0009507,GO:0009536,GO:0016020,GO:0043226,GO:0043227,GO:0043229,GO:0043231,GO:0044424,GO:0044444,GO:0044464,GO:0071944		T	Protein kinase APK1A
MSTRG.29476	MR_inoculated	MS_control	4.26411	7.82784	1.30764e-08	1.12277e-06	Up	Yes	XP_014524203.1		3847.GLYMA12G34580.1		GO:0008150,GO:0009628,GO:0050896,GO:0080167		D, Z	calcium-binding protein PBP1-like
MSTRG.22505	MR_inoculated	MS_control	4.31637	6.44025	1.31603e-08	1.12464e-06	Up	Yes	XP_014515116.1		3847.GLYMA03G16140.1				S	GDSL esterase lipase
MSTRG.7552	MR_inoculated	MS_control	4.67767	4.11835	1.40434e-08	1.19189e-06	Up	Yes	XP_014497401.1		3847.GLYMA08G48200.1
MSTRG.19282	MR_inoculated	MS_control	4.33872	5.95401	1.40787e-08	1.19189e-06	Up	Yes
MSTRG.2395	MR_inoculated	MS_control	4.50336	4.69921	1.49235e-08	1.25753e-06	Up	Yes	XP_014506333.1		3847.GLYMA16G29661.1				P	Heavy metal-associated domain containing protein
MSTRG.26604	MR_inoculated	MS_control	4.51145	4.64066	1.53046e-08	1.28368e-06	Up	Yes	XP_014519195.1		3847.GLYMA02G13910.1	GH3.3	GO:0003674,GO:0003824,GO:0008150,GO:0008152,GO:0009314,GO:0009416,GO:0009628,GO:0009719,GO:0009725,GO:0009733,GO:0010033,GO:0010252,GO:0010279,GO:0016874,GO:0016879,GO:0016881,GO:0042221,GO:0042592,GO:0048878,GO:0050896,GO:0065007,GO:0065008	K14487	S	Indole-3-acetic acid-amido synthetase
MSTRG.14947	MR_inoculated	MS_control	4.42978	5.02332	1.58742e-08	1.32532e-06	Up	Yes	XP_014508156.1		3847.GLYMA16G26060.1		GO:0002376,GO:0003674,GO:0003824,GO:0006082,GO:0006725,GO:0006950,GO:0006952,GO:0006955,GO:0008150,GO:0008152,GO:0009056,GO:0009607,GO:0009611,GO:0009620,GO:0009627,GO:0009696,GO:0009814,GO:0009817,GO:0009987,GO:0016137,GO:0016139,GO:0016787,GO:0016788,GO:0016829,GO:0016830,GO:0016832,GO:0019752,GO:0032787,GO:0042537,GO:0043436,GO:0044237,GO:0044281,GO:0044710,GO:0045087,GO:0046593,GO:0050832,GO:…		S	esterase
MSTRG.9202	MR_inoculated	MS_control	4.34889	5.57516	1.63809e-08	1.36134e-06	Up	Yes	XP_014500328.2		3847.GLYMA04G06410.2		GO:0005575,GO:0005623,GO:0005886,GO:0016020,GO:0031224,GO:0031225,GO:0044425,GO:0044464,GO:0071944		S	Early nodulin-like protein
MSTRG.21475	MR_inoculated	MS_control	-4.2684	6.32362	1.82456e-08	1.50939e-06	Down	Yes	XP_014515716.1		3847.GLYMA07G03370.2		GO:0005575,GO:0005622,GO:0005623,GO:0005737,GO:0006082,GO:0006629,GO:0006631,GO:0006633,GO:0006636,GO:0008150,GO:0008152,GO:0008610,GO:0009058,GO:0009314,GO:0009416,GO:0009507,GO:0009526,GO:0009536,GO:0009579,GO:0009628,GO:0009642,GO:0009644,GO:0009892,GO:0009941,GO:0009987,GO:0010109,GO:0010205,GO:0016020,GO:0016053,GO:0019222,GO:0019752,GO:0031090,GO:0031323,GO:0031324,GO:0031967,GO:0031969,GO:…	K00507	I	desaturase
MSTRG.15317	MR_inoculated	MS_control	-4.2677	6.30488	1.85579e-08	1.52179e-06	Down	Yes	XP_014510114.1		3847.GLYMA17G14830.1	OSI_09629	GO:0003674,GO:0005215,GO:0005575,GO:0005623,GO:0005886,GO:0006810,GO:0006811,GO:0006820,GO:0006950,GO:0008150,GO:0008509,GO:0009414,GO:0009415,GO:0009628,GO:0009987,GO:0010035,GO:0010167,GO:0015075,GO:0015103,GO:0015112,GO:0015698,GO:0015706,GO:0016020,GO:0022857,GO:0022891,GO:0022892,GO:0034220,GO:0042221,GO:0044464,GO:0044699,GO:0044763,GO:0044765,GO:0050896,GO:0051179,GO:0051234,GO:0055085,GO:…	K14638	P	Nitrate transporter
MSTRG.19531	MR_inoculated	MS_control	-4.19232	8.85852	1.85766e-08	1.52179e-06	Down	Yes	XP_014512475.1		3847.GLYMA02G02070.1				S	Late embryogenesis abundant protein
MSTRG.23527	MR_inoculated	MS_control	-4.1889	9.15024	1.86475e-08	1.52179e-06	Down	Yes	XP_014518852.1		3847.GLYMA18G05720.1		GO:0005575,GO:0005622,GO:0005623,GO:0005634,GO:0008150,GO:0009314,GO:0009416,GO:0009605,GO:0009606,GO:0009628,GO:0009637,GO:0009638,GO:0032501,GO:0043226,GO:0043227,GO:0043229,GO:0043231,GO:0044424,GO:0044464,GO:0044699,GO:0044707,GO:0050896		S	Root phototropism protein
MSTRG.24277	MR_inoculated	MS_control	-4.59068	4.13941	2.06006e-08	1.66897e-06	Down	Yes	XP_014517857.2		3847.GLYMA13G29000.1				G	Glycosyl hydrolase family 17 protein
MSTRG.12081	MR_inoculated	MS_control	4.18814	7.9283	2.06353e-08	1.66897e-06	Up	Yes	XP_014505099.1		59689.fgenesh2_kg.5__1755__AT3G53730.1				B	Core component of nucleosome. Nucleosomes wrap and compact DNA into chromatin, limiting DNA accessibility to the cellular machineries which require DNA as a template. Histones thereby play a central role in transcription regulation, DNA repair, DNA replication and chromosomal stability. DNA accessibility is regulated via a complex set of post-translational modifications of histones, also called h…
MSTRG.11964	MR_inoculated	MS_control	-4.3332	5.35432	2.09277e-08	1.6851e-06	Down	Yes	XP_014505026.1		3847.GLYMA02G40200.1		GO:0003674,GO:0003824,GO:0004672,GO:0004674,GO:0005575,GO:0005622,GO:0005623,GO:0005634,GO:0005737,GO:0006464,GO:0006468,GO:0006793,GO:0006796,GO:0008150,GO:0008152,GO:0009987,GO:0016301,GO:0016310,GO:0016740,GO:0016772,GO:0016773,GO:0019538,GO:0036211,GO:0043170,GO:0043226,GO:0043227,GO:0043229,GO:0043231,GO:0043412,GO:0044237,GO:0044238,GO:0044260,GO:0044267,GO:0044424,GO:0044464,GO:0046777,GO:…	K08867	T	With no lysine
MSTRG.22268	MR_inoculated	MS_control	4.22429	6.3699	2.32896e-08	1.86698e-06	Up	Yes	XP_014515887.1		3847.GLYMA07G14010.1		GO:0005575,GO:0005622,GO:0005623,GO:0005737,GO:0005783,GO:0005789,GO:0012505,GO:0016020,GO:0031090,GO:0042175,GO:0043226,GO:0043227,GO:0043229,GO:0043231,GO:0044422,GO:0044424,GO:0044425,GO:0044432,GO:0044444,GO:0044446,GO:0044464	K15404	I	WAX2 C-terminal domain
MSTRG.15734	MR_inoculated	MS_control	-4.20755	6.60107	2.38988e-08	1.90738e-06	Down	Yes	XP_014505840.1		3847.GLYMA08G06470.1		GO:0003674,GO:0003824,GO:0004672,GO:0004674,GO:0006464,GO:0006468,GO:0006793,GO:0006796,GO:0008150,GO:0008152,GO:0009987,GO:0016301,GO:0016310,GO:0016740,GO:0016772,GO:0016773,GO:0019538,GO:0036211,GO:0043170,GO:0043412,GO:0044237,GO:0044238,GO:0044260,GO:0044267,GO:0046777,GO:0071704		S	Octicosapeptide Phox Bem1p
MSTRG.5109	MR_inoculated	MS_control	-4.24156	5.99992	2.45009e-08	1.94686e-06	Down	Yes	XP_014496372.1		3847.GLYMA03G34230.1				S	Nodulin-like
MSTRG.11886	MR_inoculated	MS_control	-4.3031	5.28861	2.59096e-08	2.0498e-06	Down	Yes	XP_014502591.1		3847.GLYMA14G39130.1				K	MYB family transcription factor
MSTRG.6320	MR_inoculated	MS_control	-4.24454	5.81423	2.62916e-08	2.07098e-06	Down	Yes	XP_014497967.1		3847.GLYMA13G40470.1	RAP2.7	GO:0005575,GO:0005622,GO:0005623,GO:0005634,GO:0043226,GO:0043227,GO:0043229,GO:0043231,GO:0044424,GO:0044464	K09284,K09285	K	Transcription factor
MSTRG.6987	MR_inoculated	MS_control	4.32235	5.10602	2.64756e-08	2.07644e-06	Up	Yes	XP_022635655.1		3847.GLYMA18G47450.1				O	subtilisin-like
MSTRG.16647	MR_inoculated	MS_control	-4.26261	5.58488	2.68466e-08	2.09646e-06	Down	Yes	XP_022639629.1		3847.GLYMA13G00630.2		GO:0000041,GO:0003674,GO:0005215,GO:0005385,GO:0005575,GO:0005623,GO:0005886,GO:0005911,GO:0006810,GO:0006811,GO:0006812,GO:0006829,GO:0008150,GO:0008324,GO:0009506,GO:0009987,GO:0010035,GO:0010038,GO:0010043,GO:0015075,GO:0015086,GO:0015691,GO:0016020,GO:0022857,GO:0022890,GO:0022891,GO:0022892,GO:0030001,GO:0030054,GO:0032025,GO:0034220,GO:0042221,GO:0042592,GO:0044464,GO:0044699,GO:0044763,GO:…	K01534	P	cadmium zinc-transporting ATPase
MSTRG.10075	MR_inoculated	MS_control	-4.13907	7.99409	2.77913e-08	2.15383e-06	Down	Yes	XP_014501135.1		3847.GLYMA11G21580.4
MSTRG.640	MR_inoculated	MS_control	-4.63438	3.84046	2.78759e-08	2.15383e-06	Down	Yes
MSTRG.3759	MR_inoculated	MS_control	4.27333	5.40468	2.79378e-08	2.15383e-06	Up	Yes	XP_014519185.1		3847.GLYMA06G44930.1		GO:0005575,GO:0005618,GO:0005623,GO:0005911,GO:0006949,GO:0008150,GO:0009506,GO:0009653,GO:0009987,GO:0016020,GO:0030054,GO:0030312,GO:0032502,GO:0044464,GO:0044699,GO:0044763,GO:0044767,GO:0048646,GO:0048856,GO:0055044,GO:0071944		G	May cause loosening and extension of plant cell walls by disrupting non-covalent bonding between cellulose microfibrils and matrix glucans. No enzymatic activity has been found
MSTRG.3804	MR_inoculated	MS_control	-4.19224	6.33862	2.84466e-08	2.18376e-06	Down	Yes	XP_014494176.1		3847.GLYMA06G44330.1	GLK1	GO:0005575,GO:0005622,GO:0005623,GO:0005634,GO:0006355,GO:0008150,GO:0009889,GO:0009891,GO:0009893,GO:0010468,GO:0010556,GO:0010557,GO:0010604,GO:0010628,GO:0010638,GO:0019219,GO:0019222,GO:0031323,GO:0031325,GO:0031326,GO:0031328,GO:0033043,GO:0043226,GO:0043227,GO:0043229,GO:0043231,GO:0044424,GO:0044464,GO:0045893,GO:0045935,GO:0048518,GO:0048522,GO:0050789,GO:0050794,GO:0051128,GO:0051130,GO:…		K	transcription factor
MSTRG.732	MR_inoculated	MS_control	4.23141	5.75152	2.89419e-08	2.21241e-06	Up	Yes	XP_014510735.1		3847.GLYMA07G09230.1		GO:0000418,GO:0000428,GO:0005575,GO:0005622,GO:0005623,GO:0005634,GO:0005654,GO:0005665,GO:0016591,GO:0030880,GO:0031974,GO:0031981,GO:0032991,GO:0043226,GO:0043227,GO:0043229,GO:0043231,GO:0043233,GO:0043234,GO:0044422,GO:0044424,GO:0044428,GO:0044446,GO:0044451,GO:0044464,GO:0055029,GO:0070013	K03013	K	DNA-directed RNA polymerases I, II, and III subunit
MSTRG.30009	MR_inoculated	MS_control	4.24505	5.59879	2.90929e-08	2.2146e-06	Up	Yes	XP_014489648.1		3847.GLYMA18G06310.1				S	Transferase family
MSTRG.24320	MR_inoculated	MS_control	4.10793	9.66086	2.92801e-08	2.21464e-06	Up	Yes	XP_014519105.1		3847.GLYMA15G09560.1		GO:0005575,GO:0005576,GO:0005618,GO:0005622,GO:0005623,GO:0005634,GO:0005737,GO:0009507,GO:0009534,GO:0009536,GO:0009579,GO:0030312,GO:0031976,GO:0031984,GO:0043226,GO:0043227,GO:0043229,GO:0043231,GO:0044422,GO:0044424,GO:0044434,GO:0044435,GO:0044444,GO:0044446,GO:0044464,GO:0048046,GO:0071944		I	GDSL esterase lipase
MSTRG.403	MR_inoculated	MS_control	-4.23559	5.70138	2.93379e-08	2.21464e-06	Down	Yes	XP_014517396.1		3847.GLYMA01G02180.1				S	zinc-binding protein
MSTRG.2634	MR_inoculated	MS_control	-4.15939	6.88505	2.95785e-08	2.22354e-06	Down	Yes	XP_022632660.1		3847.GLYMA12G00790.1		GO:0003674,GO:0003824,GO:0004805,GO:0005975,GO:0005984,GO:0005991,GO:0005992,GO:0006793,GO:0006796,GO:0006950,GO:0006970,GO:0008150,GO:0008152,GO:0009058,GO:0009266,GO:0009311,GO:0009312,GO:0009409,GO:0009628,GO:0009651,GO:0009987,GO:0016051,GO:0016311,GO:0016787,GO:0016788,GO:0016791,GO:0019203,GO:0034637,GO:0042578,GO:0044237,GO:0044238,GO:0044249,GO:0044262,GO:0044723,GO:0046351,GO:0050896,GO:…	K01087	G	Removes the phosphate from trehalose 6-phosphate to produce free trehalose. Trehalose accumulation in plant may improve abiotic stress tolerance
MSTRG.7304	MR_inoculated	MS_control	4.18992	5.92977	3.37223e-08	2.52458e-06	Up	Yes	XP_014497881.1		3847.GLYMA18G50760.1		GO:0005575,GO:0005622,GO:0005623,GO:0005737,GO:0005794,GO:0005886,GO:0016020,GO:0031224,GO:0031225,GO:0031226,GO:0043226,GO:0043227,GO:0043229,GO:0043231,GO:0044424,GO:0044425,GO:0044444,GO:0044459,GO:0044464,GO:0046658,GO:0071944		S	cobra-like protein
MSTRG.4885	MR_inoculated	MS_control	-4.37293	4.57447	3.38983e-08	2.52731e-06	Down	Yes	XP_014496281.1		3847.GLYMA19G24751.1				T	resistance protein
MSTRG.29014	MR_inoculated	MS_control	-4.21161	5.65138	3.45492e-08	2.56528e-06	Down	Yes	XP_014523786.1		3847.GLYMA05G32620.2		GO:0005575,GO:0016020		Q	ABC transporter G family member
MSTRG.25458	MR_inoculated	MS_control	-4.33608	4.7217	3.51306e-08	2.5978e-06	Down	Yes	XP_022631292.1		3847.GLYMA11G04941.1				S	Protein PHLOEM PROTEIN 2-LIKE
MSTRG.18549	MR_inoculated	MS_control	-4.11688	7.27309	3.52957e-08	2.5994e-06	Down	Yes	XP_014514054.1		3847.GLYMA10G24540.2		GO:0005575,GO:0005622,GO:0005623,GO:0005737,GO:0009507,GO:0009536,GO:0043226,GO:0043227,GO:0043229,GO:0043231,GO:0044424,GO:0044444,GO:0044464	K08869	S	Phosphotransferase enzyme family
MSTRG.17443	MR_inoculated	MS_control	4.21218	5.5677	3.56756e-08	2.6157e-06	Up	Yes	XP_014509762.1		3847.GLYMA11G21390.1
MSTRG.31891	MR_inoculated	MS_control	4.24082	5.30407	3.58057e-08	2.6157e-06	Up	Yes	XP_014491743.1		3847.GLYMA13G37491.1				S	epidermal patterning factor
MSTRG.20702	MR_inoculated	MS_control	4.14921	6.24726	3.76297e-08	2.7379e-06	Up	Yes	XP_014512565.1		3847.GLYMA02G18090.1				S	L-type lectin-domain containing receptor kinase
MSTRG.7728	MR_inoculated	MS_control	4.18138	5.75547	3.84651e-08	2.78749e-06	Up	Yes	XP_022636102.1		3847.GLYMA15G15380.1				S	cAMP-regulated phosphoprotein/endosulfine conserved region
MSTRG.13181	MR_inoculated	MS_control	-4.0919	7.43124	3.99956e-08	2.88336e-06	Down	Yes	XP_022638235.1		3847.GLYMA0041S00290.1		GO:0005575,GO:0005576		S	early-responsive to dehydration
MSTRG.3739	MR_inoculated	MS_control	4.43544	4.18231	4.01063e-08	2.88336e-06	Up	Yes	XP_022634336.1		3847.GLYMA12G12210.2				S	ELMO domain-containing protein
MSTRG.4409	MR_inoculated	MS_control	4.17606	5.6992	4.07978e-08	2.92148e-06	Up	Yes	XP_014493691.1		3847.GLYMA11G35780.1				S	Heavy-metal-associated domain
MSTRG.21031	MR_inoculated	MS_control	4.39327	4.30946	4.15442e-08	2.96321e-06	Up	Yes
MSTRG.27029	MR_inoculated	MS_control	4.13906	6.12851	4.17247e-08	2.96442e-06	Up	Yes	XP_014521821.2		3847.GLYMA01G01570.1				I, O, T	Lipase (class 3)
MSTRG.8097	MR_inoculated	MS_control	4.07087	7.58035	4.41514e-08	3.12458e-06	Up	Yes	XP_014500899.1		3847.GLYMA15G24610.1
MSTRG.18876	MR_inoculated	MS_control	4.46023	4.01678	4.54249e-08	3.20219e-06	Up	Yes
MSTRG.31697	MR_inoculated	MS_control	4.21887	5.13257	4.56335e-08	3.20443e-06	Up	Yes	XP_014491495.2		3847.GLYMA09G04010.1				C	Iron-Sulfur binding protein C terminal
MSTRG.13216	MR_inoculated	MS_control	-4.08137	7.00214	4.60413e-08	3.22058e-06	Down	Yes	XP_014505072.1		3847.GLYMA14G09830.6		GO:0005575,GO:0005622,GO:0005623,GO:0005634,GO:0005737,GO:0006950,GO:0006970,GO:0008150,GO:0009628,GO:0009651,GO:0043226,GO:0043227,GO:0043229,GO:0043231,GO:0044424,GO:0044464,GO:0050896		Z	Interferon-related developmental regulator
MSTRG.7170	MR_inoculated	MS_control	4.01899	10.9349	5.02024e-08	3.49814e-06	Up	Yes	XP_022635713.1		3847.GLYMA18G49400.1		GO:0005575,GO:0005576,GO:0007154,GO:0007165,GO:0008150,GO:0009719,GO:0009725,GO:0009739,GO:0009740,GO:0009755,GO:0009987,GO:0010033,GO:0010476,GO:0019725,GO:0023052,GO:0032870,GO:0033993,GO:0042221,GO:0042592,GO:0044699,GO:0044700,GO:0044763,GO:0045454,GO:0050789,GO:0050794,GO:0050896,GO:0051716,GO:0065007,GO:0065008,GO:0070887,GO:0071310,GO:0071370,GO:0071396,GO:0071495,GO:1901700,GO:1901701		S	Gibberellin-regulated protein
MSTRG.11047	MR_inoculated	MS_control	4.31629	4.45573	5.11384e-08	3.54971e-06	Up	Yes	XP_014504226.1		4113.PGSC0003DMT400044761
MSTRG.19178	MR_inoculated	MS_control	4.41615	4.07269	5.14181e-08	3.5555e-06	Up	Yes	XP_014512829.2		3847.GLYMA13G19570.1				S	Zinc finger protein
MSTRG.2398	MR_inoculated	MS_control	4.08302	6.42629	5.26346e-08	3.62579e-06	Up	Yes	XP_014507476.1		3847.GLYMA16G29640.1		GO:0005575,GO:0005622,GO:0005623,GO:0005737,GO:0009507,GO:0009534,GO:0009535,GO:0009536,GO:0009579,GO:0016020,GO:0031976,GO:0031984,GO:0034357,GO:0042651,GO:0043226,GO:0043227,GO:0043229,GO:0043231,GO:0044422,GO:0044424,GO:0044434,GO:0044435,GO:0044436,GO:0044444,GO:0044446,GO:0044464,GO:0055035		S	Protein of unknown function (DUF3464)
MSTRG.24330	MR_inoculated	MS_control	4.11159	5.92159	5.32125e-08	3.65171e-06	Up	Yes	XP_014518826.1		3847.GLYMA15G09520.2				S	GDSL esterase lipase
MSTRG.27916	MR_inoculated	MS_control	4.35102	4.26954	5.38286e-08	3.68005e-06	Up	Yes
MSTRG.716	MR_inoculated	MS_control	-4.33273	4.32802	5.53268e-08	3.76825e-06	Down	Yes
MSTRG.30842	MR_inoculated	MS_control	-4.09404	6.06607	5.61731e-08	3.80526e-06	Down	Yes	XP_014490487.1		3847.GLYMA04G37640.4				S	Inherit from KOG: family with sequence similarity 214, member
MSTRG.13067	MR_inoculated	MS_control	4.36097	4.19786	5.62902e-08	3.80526e-06	Up	Yes	XP_014502674.1		3847.GLYMA14G11760.1				S	Early nodulin-like protein
MSTRG.19506	MR_inoculated	MS_control	-4.02469	7.51593	5.9331e-08	3.99591e-06	Down	Yes	XP_014513384.1		3847.GLYMA10G02370.1		GO:0000325,GO:0003674,GO:0003824,GO:0005215,GO:0005575,GO:0005622,GO:0005623,GO:0005737,GO:0005773,GO:0005774,GO:0005794,GO:0005886,GO:0005911,GO:0006139,GO:0006152,GO:0006163,GO:0006195,GO:0006200,GO:0006725,GO:0006753,GO:0006793,GO:0006796,GO:0006807,GO:0006810,GO:0006811,GO:0006820,GO:0006835,GO:0006855,GO:0006865,GO:0006950,GO:0008150,GO:0008152,GO:0008517,GO:0009056,GO:0009116,GO:0009117,GO:…	K05665	Q	ABC transporter C family member
MSTRG.31784	MR_inoculated	MS_control	-4.01127	7.78812	6.21585e-08	4.17083e-06	Down	Yes	XP_014491609.1		3847.GLYMA03G41690.1		GO:0005575,GO:0005622,GO:0005623,GO:0005634,GO:0005737,GO:0005739,GO:0005740,GO:0005743,GO:0016020,GO:0019866,GO:0031090,GO:0031966,GO:0031967,GO:0031975,GO:0043226,GO:0043227,GO:0043229,GO:0043231,GO:0044422,GO:0044424,GO:0044429,GO:0044444,GO:0044446,GO:0044464	K14684	C	mitochondrial substrate carrier family protein
MSTRG.28573	MR_inoculated	MS_control	4.2632	4.47181	6.57505e-08	4.38529e-06	Up	Yes	XP_014523331.1		3847.GLYMA18G12660.2				G	4,6-dehydratase
MSTRG.6406	MR_inoculated	MS_control	-4.09423	5.69727	6.58386e-08	4.38529e-06	Down	Yes	XP_014497090.1		3847.GLYMA12G30270.1				K	zinc finger protein ZAT5-like
MSTRG.7079	MR_inoculated	MS_control	4.33201	4.17053	6.71803e-08	4.45826e-06	Up	Yes	XP_022635688.1		3847.GLYMA18G48530.1				O	peptidase (S8 and S53, subtilisin, kexin, sedolisin
MSTRG.4627	MR_inoculated	MS_control	4.44968	3.78927	6.87139e-08	4.53559e-06	Up	Yes	XP_014495654.1		3847.GLYMA03G30100.1
MSTRG.21660	MR_inoculated	MS_control	4.05915	6.03419	6.88462e-08	4.53559e-06	Up	Yes
MSTRG.30457	MR_inoculated	MS_control	-3.96578	9.16812	7.38991e-08	4.85083e-06	Down	Yes
MSTRG.31462	MR_inoculated	MS_control	-4.31283	4.15145	7.63739e-08	4.99519e-06	Down	Yes	XP_014491205.2		3847.GLYMA19G29730.1	OSI_34941			G, M, W	exostosin family domain containing protein, expressed
MSTRG.12640	MR_inoculated	MS_control	4.32824	4.0811	7.72034e-08	5.03127e-06	Up	Yes	XP_014503875.1		3847.GLYMA14G23560.1				S	Universal stress protein
MSTRG.15013	MR_inoculated	MS_control	-4.03007	6.15147	7.89671e-08	5.12401e-06	Down	Yes	XP_022639053.1		3847.GLYMA05G20340.1		GO:0005575,GO:0005622,GO:0005623,GO:0005737,GO:0005886,GO:0009507,GO:0009536,GO:0016020,GO:0043226,GO:0043227,GO:0043229,GO:0043231,GO:0044424,GO:0044444,GO:0044464,GO:0071944		S	Remorin, C-terminal region
MSTRG.30350	MR_inoculated	MS_control	4.19295	4.64351	7.91921e-08	5.12401e-06	Up	Yes	XP_022632935.1		3847.GLYMA04G37020.2		GO:0005575,GO:0005622,GO:0005623,GO:0005737,GO:0009507,GO:0009536,GO:0043226,GO:0043227,GO:0043229,GO:0043231,GO:0044424,GO:0044444,GO:0044464		A, K	ribonuclease J-like
MSTRG.20669	MR_inoculated	MS_control	4.16065	4.81721	8.02425e-08	5.1735e-06	Up	Yes	XP_014512747.1		3847.GLYMA20G30160.1
MSTRG.28239	MR_inoculated	MS_control	4.23526	4.37934	8.39167e-08	5.3912e-06	Up	Yes	XP_014522971.2		3847.GLYMA02G08650.2				S	CONTAINS InterPro DOMAIN s Munc13 homology 1 (InterPro IPR014770), Protein of
MSTRG.14218	MR_inoculated	MS_control	4.19817	4.53441	8.58291e-08	5.49458e-06	Up	Yes	XP_014506015.1		3847.GLYMA20G02830.2				S	Pentatricopeptide repeat-containing protein
MSTRG.10558	MR_inoculated	MS_control	-3.9326	10.0046	8.63132e-08	5.50611e-06	Down	Yes	XP_014501427.1		3847.GLYMA15G02230.1		GO:0003674,GO:0003824,GO:0004470,GO:0004473,GO:0005488,GO:0005515,GO:0005575,GO:0005622,GO:0005623,GO:0005737,GO:0006082,GO:0006108,GO:0006461,GO:0006629,GO:0006631,GO:0006633,GO:0008150,GO:0008152,GO:0008270,GO:0008610,GO:0009058,GO:0009507,GO:0009536,GO:0009987,GO:0016043,GO:0016053,GO:0016491,GO:0016614,GO:0016615,GO:0016616,GO:0019752,GO:0022607,GO:0032787,GO:0042802,GO:0042803,GO:0043167,GO:…	K00029	C	malic enzyme
MSTRG.29903	MR_inoculated	MS_control	-4.12523	4.96167	8.72351e-08	5.54539e-06	Down	Yes	XP_014524566.1		3847.GLYMA18G20800.1		GO:0005575,GO:0005622,GO:0005623,GO:0005737,GO:0005777,GO:0042579,GO:0043226,GO:0043227,GO:0043229,GO:0043231,GO:0044424,GO:0044444,GO:0044464	K00276	Q	Copper methylamine
MSTRG.5345	MR_inoculated	MS_control	4.15718	4.71552	8.93263e-08	5.65847e-06	Up	Yes	XP_022635040.1		3847.GLYMA03G36720.1			K11816	Q	flavin-containing monooxygenase
MSTRG.21753	MR_inoculated	MS_control	4.05258	5.5298	8.96983e-08	5.66224e-06	Up	Yes	XP_014515270.1		3847.GLYMA07G04340.1				S	auxin-binding protein ABP19a-like
MSTRG.19570	MR_inoculated	MS_control	4.37294	3.82977	9.09599e-08	5.72195e-06	Up	Yes	XP_014512697.1		3847.GLYMA02G01780.1				S	long cell-linked locus protein
MSTRG.5358	MR_inoculated	MS_control	-4.32108	3.98202	9.27634e-08	5.81521e-06	Down	Yes	XP_014495597.1		3847.GLYMA19G39510.1			K03676	O	Glutaredoxin
MSTRG.30176	MR_inoculated	MS_control	3.91412	9.75834	9.70068e-08	6.05545e-06	Up	Yes	XP_014489870.1		3847.GLYMA07G00540.1	OSI_29415	GO:0005575,GO:0005622,GO:0005623,GO:0005737,GO:0009507,GO:0009536,GO:0043226,GO:0043227,GO:0043229,GO:0043231,GO:0044424,GO:0044444,GO:0044464	K00058	E	D-3-phosphoglycerate dehydrogenase
MSTRG.300	MR_inoculated	MS_control	4.08652	5.08527	9.72642e-08	6.05545e-06	Up	Yes	XP_014503977.1		3847.GLYMA19G01910.1		GO:0000139,GO:0003674,GO:0003824,GO:0005575,GO:0005622,GO:0005623,GO:0005737,GO:0005794,GO:0006950,GO:0006979,GO:0008150,GO:0008152,GO:0008194,GO:0012505,GO:0016020,GO:0016740,GO:0016757,GO:0016758,GO:0031090,GO:0043226,GO:0043227,GO:0043229,GO:0043231,GO:0044422,GO:0044424,GO:0044431,GO:0044444,GO:0044446,GO:0044464,GO:0047262,GO:0050896		G	Galacturonosyltransferase-like
MSTRG.31951	MR_inoculated	MS_control	-3.93428	7.85713	9.83287e-08	6.10076e-06	Down	Yes	XP_014491654.1		3847.GLYMA12G33430.1	GLK1	GO:0005575,GO:0005622,GO:0005623,GO:0005634,GO:0006355,GO:0008150,GO:0009889,GO:0009891,GO:0009893,GO:0010468,GO:0010556,GO:0010557,GO:0010604,GO:0010628,GO:0010638,GO:0019219,GO:0019222,GO:0031323,GO:0031325,GO:0031326,GO:0031328,GO:0033043,GO:0043226,GO:0043227,GO:0043229,GO:0043231,GO:0044424,GO:0044464,GO:0045893,GO:0045935,GO:0048518,GO:0048522,GO:0050789,GO:0050794,GO:0051128,GO:0051130,GO:…		K	transcription factor
MSTRG.3455	MR_inoculated	MS_control	3.92541	8.24047	9.94922e-08	6.15188e-06	Up	Yes	XP_014494319.1		3847.GLYMA12G08650.1		GO:0000302,GO:0000303,GO:0003674,GO:0003824,GO:0004784,GO:0005488,GO:0005507,GO:0005575,GO:0005576,GO:0005622,GO:0005623,GO:0005737,GO:0006801,GO:0006950,GO:0006970,GO:0006979,GO:0008150,GO:0008152,GO:0008270,GO:0009314,GO:0009411,GO:0009416,GO:0009507,GO:0009532,GO:0009536,GO:0009570,GO:0009579,GO:0009628,GO:0009642,GO:0009651,GO:0009743,GO:0009744,GO:0009892,GO:0009987,GO:0010033,GO:0010035,GO:…	K04565	P	Destroys radicals which are normally produced within the cells and which are toxic to biological systems (By similarity)
MSTRG.11371	MR_inoculated	MS_control	-3.91688	8.32716	1.04644e-07	6.4484e-06	Down	Yes	XP_022637591.1		3847.GLYMA14G03500.1	PSY2		K02291	I	Phytoene synthase
MSTRG.5331	MR_inoculated	MS_control	-4.19671	4.34209	1.07298e-07	6.56852e-06	Down	Yes	XP_014496352.1		3847.GLYMA19G39080.1		GO:0000003,GO:0003002,GO:0003006,GO:0003674,GO:0003824,GO:0004180,GO:0004181,GO:0005575,GO:0006508,GO:0007275,GO:0007389,GO:0008150,GO:0008152,GO:0008233,GO:0008235,GO:0008237,GO:0008238,GO:0009314,GO:0009416,GO:0009628,GO:0009639,GO:0009640,GO:0009653,GO:0009790,GO:0009791,GO:0009888,GO:0009908,GO:0009909,GO:0010015,GO:0010051,GO:0010073,GO:0010075,GO:0010080,GO:0010081,GO:0010082,GO:0010305,GO:…	K01301	O, P	glutamate carboxypeptidase
MSTRG.16997	MR_inoculated	MS_control	-4.297	3.95937	1.07318e-07	6.56852e-06	Down	Yes	XP_014507851.1		3847.GLYMA15G16260.1		GO:0000160,GO:0001071,GO:0003674,GO:0003676,GO:0003677,GO:0003700,GO:0005488,GO:0005575,GO:0005622,GO:0005623,GO:0005634,GO:0005737,GO:0005886,GO:0006355,GO:0006950,GO:0007154,GO:0007165,GO:0008150,GO:0008219,GO:0009607,GO:0009719,GO:0009723,GO:0009725,GO:0009735,GO:0009753,GO:0009755,GO:0009873,GO:0009889,GO:0009891,GO:0009893,GO:0009987,GO:0010033,GO:0010468,GO:0010556,GO:0010557,GO:0010604,GO:…	K09286	K	Transcription factor
MSTRG.21492	MR_inoculated	MS_control	-4.14259	4.59518	1.08872e-07	6.64042e-06	Down	Yes	XP_014515706.1		3847.GLYMA07G03560.1				G	glyoxalase family
MSTRG.25747	MR_inoculated	MS_control	-4.16044	4.49795	1.09226e-07	6.64042e-06	Down	Yes	XP_022631327.1		3847.GLYMA01G37393.1				K	Plus3
MSTRG.31731	MR_inoculated	MS_control	4.02959	5.33606	1.13482e-07	6.87046e-06	Up	Yes	XP_014491524.1		3847.GLYMA03G42010.1		GO:0000902,GO:0000904,GO:0003674,GO:0005488,GO:0005509,GO:0007275,GO:0008150,GO:0008544,GO:0009653,GO:0009888,GO:0009913,GO:0009987,GO:0010026,GO:0010090,GO:0010091,GO:0016043,GO:0030154,GO:0030855,GO:0032501,GO:0032502,GO:0032989,GO:0043167,GO:0043169,GO:0043588,GO:0044699,GO:0044707,GO:0044763,GO:0044767,GO:0046872,GO:0048468,GO:0048513,GO:0048731,GO:0048856,GO:0048869,GO:0060429,GO:0071840		D, Z	calcium-binding protein
MSTRG.19928	MR_inoculated	MS_control	-4.15374	4.49165	1.13768e-07	6.87046e-06	Down	Yes	XP_022640936.1		3847.GLYMA20G37290.2				E	cysteine synthase
MSTRG.26120	MR_inoculated	MS_control	3.98951	5.76334	1.14755e-07	6.90706e-06	Up	Yes	XP_014521145.1		3847.GLYMA01G02150.1		GO:0005575,GO:0005622,GO:0005623,GO:0005737,GO:0009507,GO:0009532,GO:0009536,GO:0009570,GO:0009579,GO:0043226,GO:0043227,GO:0043229,GO:0043231,GO:0044422,GO:0044424,GO:0044434,GO:0044435,GO:0044444,GO:0044446,GO:0044464		A	kDa ribonucleoprotein
MSTRG.23373	MR_inoculated	MS_control	4.07654	4.91692	1.16062e-07	6.96259e-06	Up	Yes	XP_014518054.1		3847.GLYMA18G08040.1				O	chaperone protein DnaJ
MSTRG.32406	MR_inoculated	MS_control	4.12978	4.52827	1.22782e-07	7.34142e-06	Up	Yes
MSTRG.22203	MR_inoculated	MS_control	3.8841	8.60116	1.24534e-07	7.42164e-06	Up	Yes	XP_014515104.1		3847.GLYMA07G13790.1				I	Patatin group
MSTRG.29088	MR_inoculated	MS_control	3.91616	6.82786	1.27348e-07	7.56446e-06	Up	Yes	XP_014523832.1		3847.GLYMA16G05760.1				S	Pollen proteins Ole e I like
MSTRG.21302	MR_inoculated	MS_control	-3.89635	7.3478	1.31466e-07	7.78357e-06	Down	Yes	XP_014513737.1		3847.GLYMA20G38720.1		GO:0003674,GO:0003824,GO:0004802,GO:0005575,GO:0005622,GO:0005623,GO:0005737,GO:0006950,GO:0006970,GO:0008150,GO:0008152,GO:0009507,GO:0009526,GO:0009532,GO:0009534,GO:0009535,GO:0009536,GO:0009570,GO:0009579,GO:0009628,GO:0009651,GO:0009941,GO:0010035,GO:0010038,GO:0016020,GO:0016740,GO:0016744,GO:0031967,GO:0031975,GO:0031976,GO:0031984,GO:0034357,GO:0042221,GO:0042651,GO:0043226,GO:0043227,GO:…	K00615	G	Transketolase
MSTRG.12740	MR_inoculated	MS_control	3.86711	9.27193	1.33703e-07	7.86652e-06	Up	Yes	XP_014504815.1		3847.GLYMA13G09530.1				Q	alcohol dehydrogenase
MSTRG.9375	MR_inoculated	MS_control	3.97859	5.56471	1.33736e-07	7.86652e-06	Up	Yes	XP_014498713.1		3847.GLYMA06G04840.1		GO:0001071,GO:0003674,GO:0003676,GO:0003677,GO:0003700,GO:0005488,GO:0005575,GO:0005622,GO:0005623,GO:0005634,GO:0006355,GO:0006950,GO:0006970,GO:0006979,GO:0008150,GO:0008152,GO:0009266,GO:0009314,GO:0009409,GO:0009414,GO:0009415,GO:0009416,GO:0009611,GO:0009628,GO:0009642,GO:0009644,GO:0009651,GO:0009719,GO:0009725,GO:0009737,GO:0009889,GO:0009890,GO:0009892,GO:0009987,GO:0010033,GO:0010035,GO:…		K	Zinc finger protein
MSTRG.28715	MR_inoculated	MS_control	4.04734	4.93095	1.34368e-07	7.87817e-06	Up	Yes	XP_022632418.1		3847.GLYMA05G29200.2				T	Glycogen synthase kinase
MSTRG.4146	MR_inoculated	MS_control	-4.05316	4.89401	1.3533e-07	7.87859e-06	Down	Yes	XP_014494343.1		3847.GLYMA12G17510.1		GO:0000902,GO:0003674,GO:0003824,GO:0005575,GO:0005622,GO:0005623,GO:0005737,GO:0006725,GO:0006790,GO:0006807,GO:0007154,GO:0007165,GO:0008150,GO:0008152,GO:0009058,GO:0009314,GO:0009416,GO:0009507,GO:0009536,GO:0009628,GO:0009653,GO:0009700,GO:0009719,GO:0009725,GO:0009733,GO:0009734,GO:0009755,GO:0009826,GO:0009889,GO:0009891,GO:0009893,GO:0009987,GO:0010033,GO:0010120,GO:0010252,GO:0010279,GO:…	K14487	S	Indole-3-acetic acid-amido synthetase
MSTRG.1880	MR_inoculated	MS_control	4.19907	4.12651	1.35589e-07	7.87859e-06	Up	Yes	XP_014517954.1		3847.GLYMA10G35500.1				S	Acetyltransferase (GNAT) family
MSTRG.21463	MR_inoculated	MS_control	-3.8975	7.10011	1.3568e-07	7.87859e-06	Down	Yes	XP_014515118.1		3847.GLYMA07G03260.1		GO:0005575,GO:0005622,GO:0005623,GO:0005737,GO:0009507,GO:0009526,GO:0009532,GO:0009536,GO:0009570,GO:0009941,GO:0031967,GO:0031975,GO:0043226,GO:0043227,GO:0043229,GO:0043231,GO:0044422,GO:0044424,GO:0044434,GO:0044435,GO:0044444,GO:0044446,GO:0044464		S	Putative lysophospholipase
MSTRG.9753	MR_inoculated	MS_control	-4.15513	4.30305	1.3804e-07	7.99002e-06	Down	Yes	XP_022636806.1		3847.GLYMA04G00980.1				O	Ubiquitin fusion degradation protein
MSTRG.22899	MR_inoculated	MS_control	-4.19661	4.12319	1.39186e-07	8.01647e-06	Down	Yes	XP_014516411.1		3847.GLYMA01G30390.1				I	GDSL esterase lipase CPRD49-like
MSTRG.21885	MR_inoculated	MS_control	4.02746	5.02986	1.39382e-07	8.01647e-06	Up	Yes	XP_014516760.1		3847.GLYMA16G02960.1		GO:0001071,GO:0003674,GO:0003700,GO:0005575,GO:0005622,GO:0005623,GO:0005634,GO:0005730,GO:0006355,GO:0008150,GO:0009719,GO:0009889,GO:0010033,GO:0010200,GO:0010243,GO:0010468,GO:0010556,GO:0019219,GO:0019222,GO:0031323,GO:0031326,GO:0031974,GO:0031981,GO:0042221,GO:0043226,GO:0043227,GO:0043228,GO:0043229,GO:0043231,GO:0043232,GO:0043233,GO:0044422,GO:0044424,GO:0044428,GO:0044446,GO:0044464,GO:…		K	WRKY transcription factor
MSTRG.4991	MR_inoculated	MS_control	-3.93335	6.06075	1.42746e-07	8.18395e-06	Down	Yes	XP_022634909.1		3847.GLYMA19G36130.1				O	AhpC/TSA family
MSTRG.27908	MR_inoculated	MS_control	3.85837	8.70924	1.44784e-07	8.27462e-06	Up	Yes	XP_014522667.1		3847.GLYMA13G39170.1		GO:0005575,GO:0016020,GO:0031224,GO:0031225,GO:0044425		S	Pollen proteins Ole e I like
MSTRG.2393	MR_inoculated	MS_control	3.97936	5.37763	1.46617e-07	8.35302e-06	Up	Yes	XP_014503346.1		3847.GLYMA16G29710.1				P	Heavy metal-associated domain containing protein
MSTRG.26398	MR_inoculated	MS_control	-3.87253	7.23257	1.54136e-07	8.75386e-06	Down	Yes	XP_022643105.1		3847.GLYMA01G04920.1				T	Protein TWIN LOV
MSTRG.15516	MR_inoculated	MS_control	3.9715	5.34132	1.56261e-07	8.84682e-06	Up	Yes
MSTRG.6627	MR_inoculated	MS_control	3.87183	7.08526	1.57733e-07	8.90234e-06	Up	Yes
MSTRG.33075	MR_inoculated	MS_control	3.94111	5.60318	1.6224e-07	9.12826e-06	Up	Yes	XP_014492813.1		3847.GLYMA15G17421.1	OSI_17731			T	G-type lectin S-receptor-like serine threonine-protein kinase
MSTRG.10860	MR_inoculated	MS_control	-3.83957	8.52945	1.64876e-07	9.24785e-06	Down	Yes	XP_014502044.1		3847.GLYMA12G32010.1		GO:0005575,GO:0005622,GO:0005623,GO:0005737,GO:0005773,GO:0005774,GO:0016020,GO:0031090,GO:0043226,GO:0043227,GO:0043229,GO:0043231,GO:0044422,GO:0044424,GO:0044437,GO:0044444,GO:0044446,GO:0044464	K03327	V	protein TRANSPARENT TESTA 12-like
MSTRG.33287	MR_inoculated	MS_control	-4.20684	3.87475	1.84689e-07	1.03272e-05	Down	Yes	XP_014493014.2		3847.GLYMA18G49230.1				S	O-acyltransferase WSD1-like
MSTRG.25089	MR_inoculated	MS_control	-3.91958	5.55798	1.89122e-07	1.05426e-05	Down	Yes	XP_022643234.1		3847.GLYMA01G43933.1				T	RelA_SpoT
MSTRG.19816	MR_inoculated	MS_control	3.98432	4.91221	1.91152e-07	1.0623e-05	Up	Yes	XP_014512676.1		3847.GLYMA10G29070.1	MTSSB	GO:0005575,GO:0005622,GO:0005623,GO:0005737,GO:0005739,GO:0043226,GO:0043227,GO:0043229,GO:0043231,GO:0044424,GO:0044444,GO:0044464		L	single-stranded DNA-binding protein
MSTRG.15187	MR_inoculated	MS_control	-3.90253	5.74572	1.91791e-07	1.06259e-05	Down	Yes	XP_022639109.1		3847.GLYMA17G16360.1	APRR2	GO:0001071,GO:0003674,GO:0003700,GO:0005575,GO:0005622,GO:0005623,GO:0005634,GO:0006355,GO:0008150,GO:0009889,GO:0010468,GO:0010556,GO:0019219,GO:0019222,GO:0031323,GO:0031326,GO:0043226,GO:0043227,GO:0043229,GO:0043231,GO:0044424,GO:0044464,GO:0050789,GO:0050794,GO:0051171,GO:0051252,GO:0060255,GO:0065007,GO:0080090,GO:2000112,GO:2001141		K	Two-component response
MSTRG.18463	MR_inoculated	MS_control	4.17333	3.93561	1.96734e-07	1.08666e-05	Up	Yes	XP_014512748.1		3847.GLYMA10G14630.1				S	Pfam:DUF231
MSTRG.8167	MR_inoculated	MS_control	-3.91155	5.52597	2.00853e-07	1.10125e-05	Down	Yes	XP_014499847.1		3847.GLYMA06G19710.1		GO:0005575,GO:0005622,GO:0005623,GO:0005737,GO:0005739,GO:0043226,GO:0043227,GO:0043229,GO:0043231,GO:0044424,GO:0044444,GO:0044464		S	Protein of unknown function, DUF393
MSTRG.31588	MR_inoculated	MS_control	-3.79399	10.2672	2.0097e-07	1.10125e-05	Down	Yes	XP_014491312.1		3847.GLYMA16G04940.1	GAPA	GO:0005575,GO:0005576,GO:0005622,GO:0005623,GO:0005737,GO:0005975,GO:0006950,GO:0008150,GO:0008152,GO:0009058,GO:0009266,GO:0009314,GO:0009409,GO:0009416,GO:0009507,GO:0009526,GO:0009532,GO:0009534,GO:0009535,GO:0009536,GO:0009570,GO:0009579,GO:0009628,GO:0009743,GO:0009744,GO:0009941,GO:0009987,GO:0010033,GO:0010319,GO:0015977,GO:0015979,GO:0016020,GO:0016051,GO:0019253,GO:0019685,GO:0031090,GO:…	K05298	G	glyceraldehyde-3-phosphate dehydrogenase
MSTRG.8397	MR_inoculated	MS_control	3.89881	5.65623	2.012e-07	1.10125e-05	Up	Yes	XP_014500012.1		3847.GLYMA04G40130.1	WRKY70	GO:0001071,GO:0002218,GO:0002252,GO:0002253,GO:0002376,GO:0002682,GO:0002684,GO:0003674,GO:0003700,GO:0005575,GO:0005622,GO:0005623,GO:0005634,GO:0006355,GO:0006950,GO:0006952,GO:0006955,GO:0007154,GO:0007165,GO:0008150,GO:0009607,GO:0009617,GO:0009620,GO:0009627,GO:0009682,GO:0009719,GO:0009725,GO:0009751,GO:0009753,GO:0009755,GO:0009814,GO:0009862,GO:0009863,GO:0009864,GO:0009867,GO:0009889,GO:…		K	Transcription factor
MSTRG.24155	MR_inoculated	MS_control	3.92973	5.18034	2.15801e-07	1.17761e-05	Up	Yes	XP_014518209.1		3847.GLYMA13G27880.1		GO:0001071,GO:0003674,GO:0003700,GO:0005575,GO:0005622,GO:0005623,GO:0005634,GO:0006355,GO:0007275,GO:0008150,GO:0008544,GO:0009791,GO:0009888,GO:0009889,GO:0010374,GO:0010468,GO:0010556,GO:0019219,GO:0019222,GO:0031323,GO:0031326,GO:0032501,GO:0032502,GO:0043226,GO:0043227,GO:0043229,GO:0043231,GO:0043588,GO:0044424,GO:0044464,GO:0044699,GO:0044707,GO:0048513,GO:0048731,GO:0048856,GO:0050789,GO:…		K	Transcription factor
MSTRG.31559	MR_inoculated	MS_control	3.8378	6.47818	2.18702e-07	1.18986e-05	Up	Yes	XP_014491131.1		3847.GLYMA19G28700.1
MSTRG.4565	MR_inoculated	MS_control	-3.85077	6.16241	2.22502e-07	1.20691e-05	Down	Yes	XP_014493290.1		3847.GLYMA12G36690.1			K13265	V	Male sterility protein
MSTRG.27664	MR_inoculated	MS_control	-4.25355	3.60394	2.26056e-07	1.22252e-05	Down	Yes	XP_022632075.1		29760.VIT_01s0026g00360.t01				S	auxin-induced protein 5NG4-like
MSTRG.30369	MR_inoculated	MS_control	3.84003	6.25659	2.27749e-07	1.22802e-05	Up	Yes	XP_022633024.1		3847.GLYMA08G08130.2		GO:0005575,GO:0005622,GO:0005623,GO:0005737,GO:0005829,GO:0005886,GO:0006066,GO:0006576,GO:0006580,GO:0006807,GO:0008150,GO:0008152,GO:0009308,GO:0009987,GO:0016020,GO:0034641,GO:0042439,GO:0044106,GO:0044237,GO:0044281,GO:0044424,GO:0044444,GO:0044464,GO:0044710,GO:0071704,GO:0071944,GO:1901160,GO:1901564,GO:1901615	K01590	E	histidine
MSTRG.15503	MR_inoculated	MS_control	3.97901	4.69375	2.32341e-07	1.24469e-05	Up	Yes	XP_014507817.1		3847.GLYMA08G07140.1				F	glutamine amidotransferase
MSTRG.5740	MR_inoculated	MS_control	-3.90265	5.33332	2.32491e-07	1.24469e-05	Down	Yes	XP_014494921.1		3847.GLYMA18G03740.1
MSTRG.16866	MR_inoculated	MS_control	-3.81239	6.89163	2.32902e-07	1.24469e-05	Down	Yes	XP_014506942.1		3847.GLYMA13G18000.1		GO:0003674,GO:0003824,GO:0005575,GO:0005622,GO:0005623,GO:0005737,GO:0008150,GO:0008152,GO:0008728,GO:0009507,GO:0009536,GO:0016740,GO:0016772,GO:0016778,GO:0043226,GO:0043227,GO:0043229,GO:0043231,GO:0044424,GO:0044444,GO:0044464		T	Region found in RelA / SpoT proteins
MSTRG.5153	MR_inoculated	MS_control	-4.16489	3.83549	2.37383e-07	1.2649e-05	Down	Yes	XP_014495403.1		3847.GLYMA19G37290.1				T	wall-associated receptor kinase-like
MSTRG.6725	MR_inoculated	MS_control	-3.8919	5.37841	2.41058e-07	1.27848e-05	Down	Yes	XP_014498012.1		3847.GLYMA09G41340.2			K07198	T	CBL-interacting protein kinase
MSTRG.3258	MR_inoculated	MS_control	-3.83659	6.16439	2.41342e-07	1.27848e-05	Down	Yes	NP_001304201.1		3847.GLYMA12G06910.1	HSP70A		K03283	O	Heat shock cognate 70 kDa
MSTRG.798	MR_inoculated	MS_control	4.13822	3.90277	2.42732e-07	1.28209e-05	Up	Yes	XP_014506783.2		3847.GLYMA09G31640.1			K01054	I	Alpha beta fold family protein
MSTRG.24755	MR_inoculated	MS_control	-3.77579	8.15197	2.48231e-07	1.30483e-05	Down	Yes	XP_022642801.1		3847.GLYMA15G05850.2
MSTRG.24321	MR_inoculated	MS_control	3.86372	5.62349	2.4878e-07	1.30483e-05	Up	Yes	XP_022643055.1		3847.GLYMA13G29490.1				S	GDSL esterase lipase
MSTRG.2222	MR_inoculated	MS_control	3.88452	5.3725	2.49197e-07	1.30483e-05	Up	Yes	XP_014503712.1		3847.GLYMA16G28970.1				G	chitinase
MSTRG.4964	MR_inoculated	MS_control	4.20443	3.67166	2.50138e-07	1.30598e-05	Up	Yes	XP_014495226.1		3847.GLYMA19G35770.2				S	Zinc finger protein
MSTRG.25352	MR_inoculated	MS_control	-3.86169	5.64287	2.52305e-07	1.31351e-05	Down	Yes	XP_014521122.1		3847.GLYMA01G41430.1				C	FAD binding domain
MSTRG.3602	MR_inoculated	MS_control	3.78613	7.31347	2.53254e-07	1.31467e-05	Up	Yes	XP_022634287.1		3847.GLYMA12G09830.1		GO:0000288,GO:0000289,GO:0000956,GO:0003674,GO:0003824,GO:0004518,GO:0004527,GO:0005575,GO:0005622,GO:0005623,GO:0005634,GO:0005737,GO:0006139,GO:0006396,GO:0006397,GO:0006401,GO:0006402,GO:0006725,GO:0006807,GO:0006950,GO:0006952,GO:0008150,GO:0008152,GO:0008408,GO:0009056,GO:0009057,GO:0009607,GO:0009617,GO:0009987,GO:0010467,GO:0016070,GO:0016071,GO:0016787,GO:0016788,GO:0019439,GO:0031123,GO:…	K12581	K	CCR4-associated factor 1 homolog
MSTRG.24645	MR_inoculated	MS_control	-3.81355	6.28679	2.66201e-07	1.36917e-05	Down	Yes	XP_014518539.1		3847.GLYMA15G06900.1				H	regulator of ribonuclease-like protein
MSTRG.10496	MR_inoculated	MS_control	4.08652	4.02117	2.66549e-07	1.36917e-05	Up	Yes	XP_014500669.1		3847.GLYMA15G01690.1				S	coatomer protein complex, subunit beta 2 (beta prime)
MSTRG.7437	MR_inoculated	MS_control	4.0318	4.25475	2.66748e-07	1.36917e-05	Up	Yes	XP_014497023.1		3847.GLYMA18G52250.1				S	NAD(P)H-dependent oxidoreductase
MSTRG.17127	MR_inoculated	MS_control	3.8627	5.48137	2.66776e-07	1.36917e-05	Up	Yes	XP_022639802.1		3847.GLYMA07G38540.1				H	Dienelactone hydrolase family protein
MSTRG.30865	MR_inoculated	MS_control	-3.88473	5.1374	2.8627e-07	1.46322e-05	Down	Yes	XP_014490499.1		3847.GLYMA01G23180.1		GO:0005575,GO:0005623,GO:0005886,GO:0016020,GO:0044464,GO:0071944		T	proline-rich receptor-like protein kinase
MSTRG.1126	MR_inoculated	MS_control	-3.881	5.16537	2.8746e-07	1.46322e-05	Down	Yes	XP_014523419.2		3847.GLYMA16G33150.1		GO:0005575,GO:0005623,GO:0005886,GO:0006996,GO:0008150,GO:0009657,GO:0009658,GO:0009902,GO:0009987,GO:0016020,GO:0016043,GO:0044464,GO:0044699,GO:0044763,GO:0051179,GO:0051234,GO:0051640,GO:0051641,GO:0051644,GO:0051649,GO:0051656,GO:0051667,GO:0071840,GO:0071944
MSTRG.30711	MR_inoculated	MS_control	-3.81877	5.93638	2.87687e-07	1.46322e-05	Down	Yes	XP_014490357.1		3847.GLYMA01G32450.2	WNK5	GO:0000003,GO:0003006,GO:0003674,GO:0003824,GO:0004672,GO:0006464,GO:0006468,GO:0006793,GO:0006796,GO:0007275,GO:0008150,GO:0008152,GO:0009314,GO:0009416,GO:0009628,GO:0009648,GO:0009791,GO:0009987,GO:0010228,GO:0016301,GO:0016310,GO:0016740,GO:0016772,GO:0016773,GO:0019538,GO:0022414,GO:0032501,GO:0032502,GO:0036211,GO:0043170,GO:0043412,GO:0044237,GO:0044238,GO:0044260,GO:0044267,GO:0044699,GO:…	K08867	T	With no lysine
MSTRG.12732	MR_inoculated	MS_control	-3.81741	5.95252	2.88332e-07	1.46322e-05	Down	Yes	XP_014504533.1		3847.GLYMA14G24545.1		GO:0005575,GO:0005622,GO:0005623,GO:0005737,GO:0009507,GO:0009536,GO:0043226,GO:0043227,GO:0043229,GO:0043231,GO:0044424,GO:0044444,GO:0044464	K00858	G	nad kinase
MSTRG.24186	MR_inoculated	MS_control	-3.78488	6.42792	3.01474e-07	1.52565e-05	Down	Yes	XP_014518910.1		3847.GLYMA13G28210.1		GO:0005575,GO:0005622,GO:0005623,GO:0005634,GO:0043226,GO:0043227,GO:0043229,GO:0043231,GO:0044424,GO:0044464		S	F-box kelch-repeat protein
MSTRG.29335	MR_inoculated	MS_control	-3.74774	7.79325	3.03037e-07	1.52615e-05	Down	Yes	XP_022632652.1		3847.GLYMA16G07750.1				S	Inherit from KOG: Leo1, Paf1 RNA polymerase II complex component, homolog (S. cerevisiae)
MSTRG.17954	MR_inoculated	MS_control	3.81817	5.76986	3.03258e-07	1.52615e-05	Up	Yes	XP_014512785.1		3847.GLYMA10G00570.1		GO:0003674,GO:0003824,GO:0005575,GO:0005622,GO:0005623,GO:0005737,GO:0006725,GO:0006778,GO:0006787,GO:0006807,GO:0008150,GO:0008152,GO:0009056,GO:0009507,GO:0009526,GO:0009536,GO:0009941,GO:0009987,GO:0015994,GO:0015996,GO:0016020,GO:0016787,GO:0016788,GO:0019439,GO:0031090,GO:0031967,GO:0031969,GO:0031975,GO:0033013,GO:0033015,GO:0034641,GO:0042170,GO:0042440,GO:0043226,GO:0043227,GO:0043229,GO:…	K08099	H	Chlorophyllase
MSTRG.11660	MR_inoculated	MS_control	-3.84771	5.39031	3.06335e-07	1.53736e-05	Down	Yes	XP_014503519.1		3847.GLYMA14G06400.1		GO:0008150,GO:0009628,GO:0050896,GO:0080167		Q	oxidoreductase, 2OG-Fe(II) oxygenase family protein
MSTRG.29386	MR_inoculated	MS_control	3.97417	4.38276	3.13452e-07	1.56873e-05	Up	Yes	XP_014524088.1		3847.GLYMA16G02460.1		GO:0005575,GO:0005622,GO:0005623,GO:0005634,GO:0005737,GO:0005768,GO:0005802,GO:0009504,GO:0010008,GO:0016020,GO:0031090,GO:0032588,GO:0043226,GO:0043227,GO:0043229,GO:0043231,GO:0044422,GO:0044424,GO:0044440,GO:0044444,GO:0044446,GO:0044464	K07904	U	ras-related protein
MSTRG.31407	MR_inoculated	MS_control	3.83973	5.33078	3.26325e-07	1.62866e-05	Up	Yes	XP_014491238.1		3847.GLYMA19G30540.1		GO:0005575,GO:0005622,GO:0005623,GO:0005737,GO:0005794,GO:0005829,GO:0005840,GO:0005911,GO:0006950,GO:0006970,GO:0008150,GO:0009506,GO:0009628,GO:0009651,GO:0022626,GO:0030054,GO:0030529,GO:0032991,GO:0043226,GO:0043227,GO:0043228,GO:0043229,GO:0043231,GO:0043232,GO:0044424,GO:0044444,GO:0044445,GO:0044464,GO:0050896,GO:0055044	K03626	K	nascent polypeptide-associated complex subunit alpha-like
MSTRG.29777	MR_inoculated	MS_control	-3.76768	6.49481	3.27978e-07	1.63241e-05	Down	Yes	XP_014524523.1		3847.GLYMA06G16600.1		GO:0005575,GO:0005622,GO:0005623,GO:0005737,GO:0005739,GO:0043226,GO:0043227,GO:0043229,GO:0043231,GO:0044424,GO:0044444,GO:0044464		S	Polyketide cyclase / dehydrase and lipid transport
MSTRG.10921	MR_inoculated	MS_control	3.87928	4.92862	3.32407e-07	1.64992e-05	Up	Yes	XP_014499764.1		3847.GLYMA13G34520.1		GO:0005575,GO:0005576,GO:0005618,GO:0005622,GO:0005623,GO:0005737,GO:0005773,GO:0005774,GO:0005794,GO:0005829,GO:0009505,GO:0016020,GO:0030312,GO:0031090,GO:0043226,GO:0043227,GO:0043229,GO:0043231,GO:0044422,GO:0044424,GO:0044437,GO:0044444,GO:0044446,GO:0044464,GO:0048046,GO:0071944		S	Curculin-like mannose-binding lectin family protein
MSTRG.17074	MR_inoculated	MS_control	-4.03415	4.0479	3.35822e-07	1.66232e-05	Down	Yes
MSTRG.26068	MR_inoculated	MS_control	-3.8563	5.11093	3.39582e-07	1.67635e-05	Down	Yes	XP_014519855.1		3847.GLYMA01G35450.1				S	Nodulin-like
MSTRG.13238	MR_inoculated	MS_control	-3.74441	6.98988	3.41645e-07	1.68195e-05	Down	Yes	XP_022638246.1		3847.GLYMA17G35470.2		GO:0005575,GO:0005911,GO:0009506,GO:0030054,GO:0055044	K03129	K	transcription initiation factor
MSTRG.15652	MR_inoculated	MS_control	-4.0884	3.7641	3.74113e-07	1.8368e-05	Down	Yes	XP_014507166.1		3847.GLYMA17G10170.1		GO:0000156,GO:0000160,GO:0003674,GO:0004871,GO:0005575,GO:0005622,GO:0005623,GO:0005634,GO:0005737,GO:0006355,GO:0007154,GO:0007165,GO:0007623,GO:0008150,GO:0009314,GO:0009416,GO:0009628,GO:0009639,GO:0009719,GO:0009725,GO:0009735,GO:0009736,GO:0009755,GO:0009889,GO:0009987,GO:0010033,GO:0010114,GO:0010468,GO:0010556,GO:0019219,GO:0019222,GO:0023052,GO:0031323,GO:0031326,GO:0032870,GO:0035556,GO:…	K14492	K	response regulator
MSTRG.23312	MR_inoculated	MS_control	-3.82109	5.25737	3.79726e-07	1.85932e-05	Down	Yes	XP_014517742.1		3847.GLYMA18G09015.1				S	zinc finger CCCH domain-containing protein
MSTRG.30476	MR_inoculated	MS_control	3.96003	4.25103	3.83388e-07	1.87219e-05	Up	Yes
MSTRG.10429	MR_inoculated	MS_control	3.80348	5.40134	3.85371e-07	1.87682e-05	Up	Yes	XP_014500576.1		3847.GLYMA13G33720.1				S	X8 domain
MSTRG.3046	MR_inoculated	MS_control	-3.68781	8.60872	4.08432e-07	1.9838e-05	Down	Yes	XP_014493892.1		3847.GLYMA12G04890.1	PMT5	GO:0003674,GO:0005215,GO:0005351,GO:0005354,GO:0005355,GO:0005365,GO:0005402,GO:0005575,GO:0005623,GO:0005886,GO:0006810,GO:0006811,GO:0006812,GO:0006818,GO:0008150,GO:0008324,GO:0008643,GO:0008645,GO:0009987,GO:0015075,GO:0015144,GO:0015145,GO:0015146,GO:0015148,GO:0015149,GO:0015166,GO:0015168,GO:0015291,GO:0015293,GO:0015294,GO:0015295,GO:0015575,GO:0015576,GO:0015591,GO:0015665,GO:0015672,GO:…		G	Transporter
MSTRG.26809	MR_inoculated	MS_control	4.06959	3.74761	4.13542e-07	2.00325e-05	Up	Yes	XP_014521587.1		3847.GLYMA16G01690.1
MSTRG.21852	MR_inoculated	MS_control	4.1185	3.5915	4.16242e-07	2.01095e-05	Up	Yes	XP_014516732.1		3847.GLYMA08G07950.1	XYL4	GO:0000272,GO:0003674,GO:0003824,GO:0004553,GO:0005575,GO:0005576,GO:0005578,GO:0005618,GO:0005623,GO:0005975,GO:0005976,GO:0008150,GO:0008152,GO:0009044,GO:0009056,GO:0009057,GO:0009987,GO:0010383,GO:0010410,GO:0016052,GO:0016787,GO:0016798,GO:0030312,GO:0031012,GO:0043170,GO:0044036,GO:0044237,GO:0044238,GO:0044260,GO:0044421,GO:0044464,GO:0044699,GO:0044763,GO:0045491,GO:0045493,GO:0048046,GO:…	K15920	G	Glycosyl hydrolase family 3 N terminal domain
MSTRG.33238	MR_inoculated	MS_control	-3.78612	5.43368	4.22575e-07	2.03612e-05	Down	Yes	XP_014492885.1		3847.GLYMA02G12278.1
MSTRG.17448	MR_inoculated	MS_control	-3.67491	9.13084	4.31133e-07	2.07184e-05	Down	Yes	XP_014508800.1		3847.GLYMA13G26930.1
MSTRG.17483	MR_inoculated	MS_control	-3.77537	5.4948	4.36505e-07	2.08799e-05	Down	Yes	XP_014509750.1		3694.POPTR_0006s16130.1				G	transporter
MSTRG.17918	MR_inoculated	MS_control	-3.69411	7.34735	4.36799e-07	2.08799e-05	Down	Yes	XP_014513576.1		3847.GLYMA10G00210.1		GO:0005575,GO:0005622,GO:0005623,GO:0005737,GO:0009507,GO:0009526,GO:0009532,GO:0009536,GO:0009570,GO:0009941,GO:0031967,GO:0031975,GO:0043226,GO:0043227,GO:0043229,GO:0043231,GO:0044422,GO:0044424,GO:0044434,GO:0044435,GO:0044444,GO:0044446,GO:0044464		L	DNA-binding protein
MSTRG.13643	MR_inoculated	MS_control	3.71997	6.40469	4.41396e-07	2.10441e-05	Up	Yes	XP_014507838.1		3847.GLYMA02G06070.1			K08241	S	carboxyl methyltransferase
MSTRG.4284	MR_inoculated	MS_control	-3.72539	6.17721	4.55934e-07	2.16291e-05	Down	Yes	XP_014493053.1		3847.GLYMA11G37450.1	OSI_19337		K13993	O	Heat Shock Protein
MSTRG.26161	MR_inoculated	MS_control	-3.67858	7.81422	4.56054e-07	2.16291e-05	Down	Yes	XP_014520857.1		3847.GLYMA01G02400.1		GO:0005575,GO:0005623,GO:0005886,GO:0016020,GO:0044464,GO:0071944		S	Protein of unknown function (DUF1399)
MSTRG.19979	MR_inoculated	MS_control	3.83221	4.80965	4.63364e-07	2.18939e-05	Up	Yes	XP_014512341.1		3847.GLYMA20G36960.1		GO:0000988,GO:0000989,GO:0003002,GO:0003674,GO:0003712,GO:0003713,GO:0007275,GO:0007389,GO:0008150,GO:0008283,GO:0009889,GO:0009955,GO:0010556,GO:0019219,GO:0019222,GO:0031323,GO:0031326,GO:0032501,GO:0032502,GO:0044699,GO:0044707,GO:0044767,GO:0048366,GO:0048367,GO:0048731,GO:0048827,GO:0048856,GO:0050789,GO:0050794,GO:0051171,GO:0051252,GO:0060255,GO:0065007,GO:0080090,GO:2001141		K	factor 1
MSTRG.1215	MR_inoculated	MS_control	3.79627	5.11835	4.64053e-07	2.18939e-05	Up	Yes	XP_014503472.1		3847.GLYMA09G27180.2	CBF4	GO:0001071,GO:0003674,GO:0003700,GO:0005575,GO:0005622,GO:0005623,GO:0005634,GO:0006355,GO:0008150,GO:0009889,GO:0010468,GO:0010556,GO:0019219,GO:0019222,GO:0031323,GO:0031326,GO:0043226,GO:0043227,GO:0043229,GO:0043231,GO:0044424,GO:0044464,GO:0050789,GO:0050794,GO:0051171,GO:0051252,GO:0060255,GO:0065007,GO:0080090,GO:2000112,GO:2001141		K	binding factor
MSTRG.17999	MR_inoculated	MS_control	3.79406	5.11631	4.70197e-07	2.21261e-05	Up	Yes	XP_014511140.1		3847.GLYMA02G00780.1		GO:0005575,GO:0005622,GO:0005623,GO:0005737,GO:0009507,GO:0009526,GO:0009532,GO:0009536,GO:0009570,GO:0009941,GO:0031967,GO:0031975,GO:0043226,GO:0043227,GO:0043229,GO:0043231,GO:0044422,GO:0044424,GO:0044434,GO:0044435,GO:0044444,GO:0044446,GO:0044464		C	Aldo keto reductase family protein
MSTRG.28262	MR_inoculated	MS_control	4.16086	3.39633	4.74705e-07	2.22804e-05	Up	Yes	XP_022632287.1		3847.GLYMA02G08570.2				S	UPF0481 protein
MSTRG.18380	MR_inoculated	MS_control	3.8792	4.45574	4.76604e-07	2.23117e-05	Up	Yes	XP_014512056.1		3847.GLYMA14G07940.1	DFR	GO:0003674,GO:0003824,GO:0005575,GO:0005622,GO:0005623,GO:0005737,GO:0005783,GO:0005789,GO:0008150,GO:0008152,GO:0009058,GO:0009718,GO:0009812,GO:0009813,GO:0012505,GO:0016020,GO:0016491,GO:0016614,GO:0016616,GO:0019898,GO:0031090,GO:0031312,GO:0042175,GO:0042406,GO:0042440,GO:0043226,GO:0043227,GO:0043229,GO:0043231,GO:0044422,GO:0044424,GO:0044425,GO:0044432,GO:0044444,GO:0044446,GO:0044464,GO:…	K13082	Q	Dihydroflavonol4-reductase
MSTRG.33073	MR_inoculated	MS_control	-3.72468	6.01426	4.79912e-07	2.24087e-05	Down	Yes	XP_014492788.1		29760.VIT_18s0122g00190.t01		GO:0005575,GO:0005622,GO:0005623,GO:0005737,GO:0009507,GO:0009536,GO:0043226,GO:0043227,GO:0043229,GO:0043231,GO:0044424,GO:0044444,GO:0044464		S	Uncharacterised protein family UPF0047
MSTRG.33255	MR_inoculated	MS_control	3.79154	5.08319	4.85703e-07	2.26208e-05	Up	Yes
MSTRG.5065	MR_inoculated	MS_control	3.87222	4.44925	4.9679e-07	2.30778e-05	Up	Yes	XP_014495541.1		3847.GLYMA03G33790.1		GO:0000325,GO:0003674,GO:0003824,GO:0005215,GO:0005575,GO:0005622,GO:0005623,GO:0005737,GO:0005773,GO:0005774,GO:0005794,GO:0005829,GO:0005886,GO:0006139,GO:0006152,GO:0006163,GO:0006195,GO:0006200,GO:0006725,GO:0006753,GO:0006793,GO:0006796,GO:0006807,GO:0006810,GO:0006811,GO:0006812,GO:0006818,GO:0008150,GO:0008152,GO:0008324,GO:0009056,GO:0009116,GO:0009117,GO:0009119,GO:0009123,GO:0009125,GO:…	K02152	C	V-type proton ATPase subunit
MSTRG.11864	MR_inoculated	MS_control	-3.6956	6.42792	5.05506e-07	2.34226e-05	Down	Yes	XP_014505028.1		3847.GLYMA14G39330.1		GO:0003674,GO:0005215,GO:0005216,GO:0005244,GO:0005249,GO:0005261,GO:0005267,GO:0005575,GO:0006810,GO:0006811,GO:0006812,GO:0006813,GO:0008150,GO:0008324,GO:0009987,GO:0015075,GO:0015077,GO:0015079,GO:0015267,GO:0015271,GO:0015672,GO:0016020,GO:0022803,GO:0022832,GO:0022836,GO:0022838,GO:0022839,GO:0022843,GO:0022857,GO:0022890,GO:0022891,GO:0022892,GO:0030001,GO:0032879,GO:0034220,GO:0034762,GO:…		P	Potassium channel
MSTRG.12122	MR_inoculated	MS_control	4.11426	3.47504	5.09517e-07	2.35483e-05	Up	Yes	XP_014504197.1		3847.GLYMA14G36690.1				S	Inherit from euNOG: response to low sulfur
MSTRG.5413	MR_inoculated	MS_control	3.89152	4.30589	5.12671e-07	2.36337e-05	Up	Yes	XP_014496335.1		3847.GLYMA19G40020.1		GO:0005575,GO:0005618,GO:0005623,GO:0030312,GO:0044464,GO:0071944	K01051	G	pectinesterase
MSTRG.7171	MR_inoculated	MS_control	-3.97648	3.91767	5.18106e-07	2.38236e-05	Down	Yes	XP_022635722.1		3847.GLYMA18G49520.1		GO:0001071,GO:0003674,GO:0003700,GO:0005575,GO:0005622,GO:0005623,GO:0005634,GO:0006355,GO:0008150,GO:0009889,GO:0010468,GO:0010556,GO:0019219,GO:0019222,GO:0031323,GO:0031326,GO:0043226,GO:0043227,GO:0043229,GO:0043231,GO:0044424,GO:0044464,GO:0050789,GO:0050794,GO:0051171,GO:0051252,GO:0060255,GO:0065007,GO:0080090,GO:2000112,GO:2001141		S	dof zinc finger protein
MSTRG.10065	MR_inoculated	MS_control	3.739	5.52981	5.21049e-07	2.38984e-05	Up	Yes
MSTRG.14228	MR_inoculated	MS_control	3.73624	5.50501	5.34694e-07	2.44623e-05	Up	Yes	XP_022638822.1		3847.GLYMA07G35080.1		GO:0005575,GO:0005622,GO:0005623,GO:0005737,GO:0009507,GO:0009536,GO:0043226,GO:0043227,GO:0043229,GO:0043231,GO:0044424,GO:0044444,GO:0044464		S	antitermination NusB domain-containing protein
MSTRG.17421	MR_inoculated	MS_control	3.81628	4.71553	5.38635e-07	2.45805e-05	Up	Yes	XP_014510707.1		3847.GLYMA07G39140.3		GO:0005575,GO:0005623,GO:0005886,GO:0016020,GO:0044464,GO:0071944	K19891	G	glucan endo-1-3-beta-glucosidase
MSTRG.6576	MR_inoculated	MS_control	3.8019	4.78154	5.54918e-07	2.52599e-05	Up	Yes	XP_014498150.1		3847.GLYMA19G11100.2		GO:0000272,GO:0003674,GO:0003824,GO:0004721,GO:0005575,GO:0005622,GO:0005623,GO:0005737,GO:0005975,GO:0005976,GO:0005982,GO:0005983,GO:0006073,GO:0006464,GO:0006470,GO:0006793,GO:0006796,GO:0008138,GO:0008150,GO:0008152,GO:0009056,GO:0009057,GO:0009251,GO:0009507,GO:0009532,GO:0009536,GO:0009569,GO:0009570,GO:0009987,GO:0016052,GO:0016311,GO:0016787,GO:0016788,GO:0016791,GO:0019203,GO:0019538,GO:…		V	Dual specificity phosphatase, catalytic domain
MSTRG.1188	MR_inoculated	MS_control	3.75061	5.1646	5.80468e-07	2.63568e-05	Up	Yes	XP_014510577.1		3847.GLYMA16G32660.1		GO:0003674,GO:0003824,GO:0004175,GO:0004252,GO:0005575,GO:0005618,GO:0005623,GO:0008150,GO:0008152,GO:0008233,GO:0008236,GO:0016787,GO:0017171,GO:0030312,GO:0044464,GO:0070011,GO:0071944		O	subtilisin-like
MSTRG.4127	MR_inoculated	MS_control	-3.64594	7.12168	5.9665e-07	2.70238e-05	Down	Yes	XP_022634486.1		3847.GLYMA06G39740.1	OSI_26483		K10357	Z	myosin-J heavy chain-like
MSTRG.12540	MR_inoculated	MS_control	-4.16193	3.26289	6.02927e-07	2.724e-05	Down	Yes	XP_022637989.1		3847.GLYMA09G05550.1	OSI_02229		K04730	T	LRR receptor-like serine threonine-protein kinase
MSTRG.26139	MR_inoculated	MS_control	-3.73609	5.20634	6.21572e-07	2.79988e-05	Down	Yes	XP_014519365.1		3847.GLYMA09G33700.2		GO:0003674,GO:0004872,GO:0005488,GO:0005515,GO:0005575,GO:0005622,GO:0005623,GO:0005634,GO:0005737,GO:0007154,GO:0007165,GO:0008150,GO:0008289,GO:0009719,GO:0009725,GO:0009737,GO:0009738,GO:0009755,GO:0009987,GO:0010033,GO:0010427,GO:0010921,GO:0019220,GO:0019222,GO:0019840,GO:0023052,GO:0031323,GO:0031406,GO:0032870,GO:0033293,GO:0033993,GO:0035303,GO:0036094,GO:0042221,GO:0042562,GO:0042802,GO:…	K14496	T	abscisic acid receptor
MSTRG.7754	MR_inoculated	MS_control	3.66039	6.39629	6.23543e-07	2.79988e-05	Up	Yes	XP_014499168.1		3847.GLYMA17G03340.1				S	Pathogenesis-related protein Bet v I family
MSTRG.19263	MR_inoculated	MS_control	3.66785	6.19301	6.24358e-07	2.79988e-05	Up	Yes	XP_014512192.1		3847.GLYMA13G19220.1		GO:0005575,GO:0005576		S	GDSL esterase lipase
MSTRG.21312	MR_inoculated	MS_control	3.64263	6.85572	6.30927e-07	2.82235e-05	Up	Yes	XP_014510910.1		3847.GLYMA20G38780.1		GO:0005575,GO:0005622,GO:0005623,GO:0005737,GO:0005829,GO:0044424,GO:0044444,GO:0044464	K01254	E, I, O, V	Leukotriene A-4
MSTRG.17418	MR_inoculated	MS_control	3.74668	5.01018	6.45769e-07	2.88162e-05	Up	Yes	XP_014510485.1		3847.GLYMA07G39160.1	OSI_26158	GO:0005575,GO:0005618,GO:0005623,GO:0005911,GO:0009505,GO:0009506,GO:0016020,GO:0030054,GO:0030312,GO:0044464,GO:0055044,GO:0071944	K19791	Q	L-ascorbate oxidase homolog
MSTRG.8251	MR_inoculated	MS_control	-3.68639	5.74174	6.51894e-07	2.90181e-05	Down	Yes	XP_022636268.1		29760.VIT_17s0000g08730.t01			K04354	T	serine threonine protein phosphatase 2A 55 kDa regulatory subunit B beta isoform-like
MSTRG.22232	MR_inoculated	MS_control	3.96583	3.74232	6.73481e-07	2.99055e-05	Up	Yes	XP_022642098.1		3847.GLYMA07G13330.1				Q	cytochrome P450
MSTRG.10381	MR_inoculated	MS_control	3.67085	5.83473	6.81873e-07	3.02009e-05	Up	Yes	XP_014498825.1		3847.GLYMA15G40740.1		GO:0005575,GO:0005622,GO:0005623,GO:0005737,GO:0009507,GO:0009532,GO:0009536,GO:0009570,GO:0043226,GO:0043227,GO:0043229,GO:0043231,GO:0044422,GO:0044424,GO:0044434,GO:0044435,GO:0044444,GO:0044446,GO:0044464		S	Pfam:DUF143
MSTRG.10757	MR_inoculated	MS_control	3.64209	6.4468	6.84934e-07	3.02009e-05	Up	Yes	XP_014498655.1		3847.GLYMA06G47750.1				G	Glucan 1,3-beta-glucosidase
MSTRG.17380	MR_inoculated	MS_control	3.7977	4.5252	6.85134e-07	3.02009e-05	Up	Yes	XP_014508270.1		3847.GLYMA15G12211.1		GO:0005575,GO:0005576,GO:0005618,GO:0005623,GO:0030312,GO:0044464,GO:0071944	K13899,K13902	O	Cysteine proteinase inhibitor
MSTRG.23134	MR_inoculated	MS_control	3.84036	4.25847	6.937e-07	3.05043e-05	Up	Yes	XP_014517652.1		3847.GLYMA04G41490.1				S	CCT motif family protein
MSTRG.15008	MR_inoculated	MS_control	-3.59794	8.50521	7.00372e-07	3.07231e-05	Down	Yes	XP_014509031.1		3847.GLYMA17G20020.1	ZEP	GO:0003674,GO:0003824,GO:0004497,GO:0005575,GO:0005622,GO:0005623,GO:0005737,GO:0006066,GO:0006082,GO:0006629,GO:0006714,GO:0006720,GO:0006721,GO:0006950,GO:0007154,GO:0007165,GO:0008150,GO:0008152,GO:0008299,GO:0008610,GO:0009058,GO:0009266,GO:0009314,GO:0009408,GO:0009414,GO:0009415,GO:0009416,GO:0009507,GO:0009526,GO:0009534,GO:0009535,GO:0009536,GO:0009540,GO:0009579,GO:0009628,GO:0009639,GO:…	K09838	C	Converts zeaxanthin into antheraxanthin and subsequently violaxanthin (By similarity)
MSTRG.7929	MR_inoculated	MS_control	3.58539	10.3081	7.05748e-07	3.08841e-05	Up	Yes	XP_014502142.1		3847.GLYMA15G19580.1				O	cathepsin
MSTRG.29628	MR_inoculated	MS_control	-3.60344	7.77487	7.12918e-07	3.11227e-05	Down	Yes	XP_014524345.1		3847.GLYMA14G23860.1		GO:0003674,GO:0003824,GO:0004497,GO:0005575,GO:0005622,GO:0005623,GO:0005737,GO:0006725,GO:0006778,GO:0006779,GO:0006807,GO:0008150,GO:0008152,GO:0009058,GO:0009507,GO:0009526,GO:0009528,GO:0009534,GO:0009535,GO:0009536,GO:0009579,GO:0009706,GO:0009941,GO:0009987,GO:0010277,GO:0015994,GO:0015995,GO:0016020,GO:0016491,GO:0016701,GO:0016703,GO:0018130,GO:0019438,GO:0019866,GO:0031090,GO:0031967,GO:…	K13600	H	chlorophyllide a oxygenase
MSTRG.23562	MR_inoculated	MS_control	3.7483	4.80712	7.25058e-07	3.15766e-05	Up	Yes	XP_022642678.1		3847.GLYMA18G05320.1	OSI_16690	GO:0003674,GO:0005575,GO:0005622,GO:0005623,GO:0005737,GO:0006091,GO:0008150,GO:0008152,GO:0009055,GO:0009507,GO:0009534,GO:0009535,GO:0009536,GO:0009579,GO:0009767,GO:0009987,GO:0015979,GO:0016020,GO:0019684,GO:0022900,GO:0031976,GO:0031984,GO:0034357,GO:0042651,GO:0043226,GO:0043227,GO:0043229,GO:0043231,GO:0044237,GO:0044422,GO:0044424,GO:0044434,GO:0044435,GO:0044436,GO:0044444,GO:0044446,GO:…		S	oxygen-evolving enhancer protein
MSTRG.25205	MR_inoculated	MS_control	3.79396	4.47502	7.27093e-07	3.15893e-05	Up	Yes	XP_014520340.1		3847.GLYMA01G43010.1		GO:0005575,GO:0005623,GO:0005886,GO:0016020,GO:0044464,GO:0071944		S	PLAC8 family
MSTRG.19871	MR_inoculated	MS_control	3.68121	5.45411	7.41677e-07	3.21458e-05	Up	Yes	XP_014513720.1		3847.GLYMA20G37760.1		GO:0005575,GO:0005622,GO:0005623,GO:0005737,GO:0005773,GO:0043226,GO:0043227,GO:0043229,GO:0043231,GO:0044424,GO:0044444,GO:0044464	K18577	G	mannosylglycoprotein endo-beta-mannosidase-like
MSTRG.175	MR_inoculated	MS_control	-3.6825	5.40881	7.58883e-07	3.28131e-05	Down	Yes	XP_014503270.1		3847.GLYMA19G01160.1				C	alcohol dehydrogenase
MSTRG.23262	MR_inoculated	MS_control	-3.68892	5.31915	7.62386e-07	3.28861e-05	Down	Yes
MSTRG.31296	MR_inoculated	MS_control	-4.08075	3.32089	7.66341e-07	3.29781e-05	Down	Yes	XP_022633327.1		3847.GLYMA14G01231.1			K13459	T	resistance protein
MSTRG.13611	MR_inoculated	MS_control	3.82019	4.23981	7.81178e-07	3.3537e-05	Up	Yes	XP_014505747.1		3847.GLYMA02G06400.1	SDH1-1	GO:0000104,GO:0000166,GO:0001882,GO:0001883,GO:0003674,GO:0003824,GO:0005488,GO:0005524,GO:0005575,GO:0005618,GO:0005622,GO:0005623,GO:0005737,GO:0005739,GO:0005740,GO:0005743,GO:0005746,GO:0005749,GO:0006091,GO:0006119,GO:0006121,GO:0006793,GO:0006796,GO:0008150,GO:0008152,GO:0009987,GO:0015980,GO:0016020,GO:0016310,GO:0016491,GO:0016627,GO:0017076,GO:0019866,GO:0022900,GO:0022904,GO:0030312,GO:…	K00234	C	succinate dehydrogenase
MSTRG.4414	MR_inoculated	MS_control	-3.58937	7.58523	7.87692e-07	3.37367e-05	Down	Yes	XP_022634585.1		3847.GLYMA11G35750.1		GO:0005575,GO:0005622,GO:0005623,GO:0005737,GO:0009507,GO:0009536,GO:0043226,GO:0043227,GO:0043229,GO:0043231,GO:0044424,GO:0044444,GO:0044464		S	Protein of unknown function, DUF399
MSTRG.3388	MR_inoculated	MS_control	-3.56698	9.67668	7.92709e-07	3.38571e-05	Down	Yes	XP_014494131.1		3694.POPTR_0016s09090.1		GO:0005575,GO:0005623,GO:0005886,GO:0016020,GO:0044464,GO:0071944	K09872	P	plasma membrane intrinsic protein
MSTRG.30683	MR_inoculated	MS_control	-3.63295	6.07767	7.94241e-07	3.38571e-05	Down	Yes	XP_014490323.1		3847.GLYMA01G15930.1		GO:0000003,GO:0001071,GO:0003674,GO:0003700,GO:0005575,GO:0005622,GO:0005623,GO:0005634,GO:0005911,GO:0006355,GO:0008150,GO:0009506,GO:0009566,GO:0009567,GO:0009889,GO:0010468,GO:0010556,GO:0019219,GO:0019222,GO:0019953,GO:0022414,GO:0030054,GO:0031323,GO:0031326,GO:0043226,GO:0043227,GO:0043229,GO:0043231,GO:0044424,GO:0044464,GO:0044699,GO:0044702,GO:0050789,GO:0050794,GO:0051171,GO:0051252,GO:…		K	Transcription factor
MSTRG.14565	MR_inoculated	MS_control	4.07119	3.31308	8.01363e-07	3.40805e-05	Up	Yes	XP_014508062.1		3847.GLYMA19G22590.1	LHT1	GO:0003333,GO:0003674,GO:0005215,GO:0005342,GO:0005575,GO:0005622,GO:0005623,GO:0005737,GO:0005886,GO:0006810,GO:0006811,GO:0006820,GO:0006865,GO:0008150,GO:0008509,GO:0008514,GO:0009536,GO:0009628,GO:0009987,GO:0015075,GO:0015171,GO:0015711,GO:0015849,GO:0016020,GO:0022857,GO:0022891,GO:0022892,GO:0034220,GO:0043090,GO:0043226,GO:0043227,GO:0043229,GO:0043231,GO:0044424,GO:0044444,GO:0044464,GO:…		E	lysine histidine transporter
MSTRG.24431	MR_inoculated	MS_control	3.59442	7.03312	8.12189e-07	3.446e-05	Up	Yes	XP_014517982.1		3847.GLYMA15G08770.1		GO:0005575,GO:0005576		S	GDSL esterase lipase
MSTRG.19628	MR_inoculated	MS_control	3.84036	4.07691	8.29624e-07	3.51175e-05	Up	Yes	XP_014513184.1		3847.GLYMA02G01240.1
MSTRG.23579	MR_inoculated	MS_control	3.74153	4.64636	8.38233e-07	3.53992e-05	Up	Yes	XP_022642994.1		3847.GLYMA11G32931.1			K10706	A	tRNA-splicing endonuclease positive effector-related
MSTRG.26565	MR_inoculated	MS_control	-3.60349	6.50579	8.45234e-07	3.55783e-05	Down	Yes	XP_014521156.1		3847.GLYMA02G11110.1		GO:0003674,GO:0003824,GO:0004672,GO:0005575,GO:0005622,GO:0005623,GO:0005737,GO:0006464,GO:0006468,GO:0006793,GO:0006796,GO:0007623,GO:0008150,GO:0008152,GO:0009507,GO:0009534,GO:0009535,GO:0009536,GO:0009579,GO:0009987,GO:0010109,GO:0016020,GO:0016301,GO:0016310,GO:0016740,GO:0016772,GO:0016773,GO:0019222,GO:0019538,GO:0031323,GO:0031976,GO:0031984,GO:0034357,GO:0036211,GO:0042548,GO:0042651,GO:…		T	serine threonine-protein kinase
MSTRG.11269	MR_inoculated	MS_control	3.73055	4.71553	8.464e-07	3.55783e-05	Up	Yes	XP_014504166.1		3847.GLYMA14G02540.1
MSTRG.7730	MR_inoculated	MS_control	3.61254	6.18132	8.58645e-07	3.60094e-05	Up	Yes	XP_014499147.1		3847.GLYMA15G15390.1
MSTRG.25077	MR_inoculated	MS_control	3.8716	3.89803	8.66875e-07	3.62543e-05	Up	Yes	XP_014520577.1		3847.GLYMA11G01350.1	CHS1	GO:0000325,GO:0005575,GO:0005622,GO:0005623,GO:0005634,GO:0005737,GO:0005773,GO:0005774,GO:0005783,GO:0006810,GO:0006950,GO:0006979,GO:0008150,GO:0008152,GO:0009058,GO:0009314,GO:0009411,GO:0009416,GO:0009611,GO:0009628,GO:0009629,GO:0009705,GO:0009719,GO:0009725,GO:0009733,GO:0009753,GO:0009812,GO:0009813,GO:0009889,GO:0009914,GO:0009926,GO:0009962,GO:0010033,GO:0010224,GO:0010817,GO:0016020,GO:…	K00660	H	The primary product of this enzyme is 4,2',4',6'- tetrahydroxychalcone (also termed naringenin-chalcone or chalcone) which can under specific conditions spontaneously isomerize into naringenin
MSTRG.17880	MR_inoculated	MS_control	-3.63489	5.74835	8.68485e-07	3.62543e-05	Down	Yes	XP_014505605.1		3847.GLYMA05G33101.1
MSTRG.9105	MR_inoculated	MS_control	3.61572	5.97563	8.91441e-07	3.7127e-05	Up	Yes	XP_014500444.1		3847.GLYMA18G00830.1				S	Protein of unknown function (DUF3339)
MSTRG.30672	MR_inoculated	MS_control	3.82665	4.06424	8.9906e-07	3.73584e-05	Up	Yes
MSTRG.7124	MR_inoculated	MS_control	4.04787	3.2915	9.17429e-07	3.80345e-05	Up	Yes	XP_022635697.1		3847.GLYMA18G48930.2				T	LRR
MSTRG.6239	MR_inoculated	MS_control	-3.63653	5.51978	9.35194e-07	3.86825e-05	Down	Yes	XP_014496702.1		3847.GLYMA12G06480.1		GO:0005575,GO:0005576,GO:0006950,GO:0008150,GO:0009414,GO:0009415,GO:0009628,GO:0010035,GO:0042221,GO:0048046,GO:0050896,GO:1901700	K05909	Q	Multicopper oxidase
MSTRG.13729	MR_inoculated	MS_control	-3.72557	4.58927	9.59108e-07	3.95812e-05	Down	Yes	XP_014509790.1		3847.GLYMA02G05220.1		GO:0000003,GO:0003002,GO:0003006,GO:0003674,GO:0003824,GO:0004871,GO:0004872,GO:0004888,GO:0005034,GO:0005575,GO:0005623,GO:0005886,GO:0006793,GO:0006796,GO:0006950,GO:0006970,GO:0007154,GO:0007165,GO:0007275,GO:0007389,GO:0008150,GO:0008152,GO:0009414,GO:0009415,GO:0009628,GO:0009791,GO:0009927,GO:0009987,GO:0010035,GO:0010154,GO:0010375,GO:0010431,GO:0016020,GO:0016301,GO:0016310,GO:0016740,GO:…		T	Histidine kinase
MSTRG.19752	MR_inoculated	MS_control	3.56052	7.23696	9.62616e-07	3.96357e-05	Up	Yes	XP_014511134.1		3847.GLYMA20G22311.1		GO:0005575,GO:0006950,GO:0006970,GO:0006972,GO:0008150,GO:0009266,GO:0009409,GO:0009628,GO:0009651,GO:0009719,GO:0009725,GO:0009737,GO:0010033,GO:0016020,GO:0016021,GO:0031224,GO:0033993,GO:0042221,GO:0042538,GO:0044425,GO:0050896,GO:0097305,GO:1901700		S	hydrophobic protein
MSTRG.2468	MR_inoculated	MS_control	-3.59299	6.17524	9.71688e-07	3.99185e-05	Down	Yes	XP_014514543.1		3847.GLYMA09G25470.1	O7	GO:0000003,GO:0003006,GO:0003674,GO:0003824,GO:0005575,GO:0005576,GO:0005622,GO:0005623,GO:0005737,GO:0005911,GO:0006082,GO:0006950,GO:0006952,GO:0007275,GO:0008150,GO:0008152,GO:0009056,GO:0009506,GO:0009507,GO:0009532,GO:0009536,GO:0009570,GO:0009607,GO:0009620,GO:0009791,GO:0009987,GO:0010029,GO:0010030,GO:0010035,GO:0010038,GO:0010154,GO:0010214,GO:0016054,GO:0016874,GO:0016877,GO:0016878,GO:…		I	synthetase
MSTRG.8168	MR_inoculated	MS_control	3.85085	3.87886	9.78612e-07	4.0112e-05	Up	Yes	XP_014500618.1		3847.GLYMA06G19670.1
MSTRG.12860	MR_inoculated	MS_control	-3.59104	6.12117	9.96074e-07	4.06365e-05	Down	Yes	XP_022638137.1		3847.GLYMA17G29740.1		GO:0005575,GO:0005622,GO:0005623,GO:0005737,GO:0006725,GO:0006778,GO:0006787,GO:0006807,GO:0006950,GO:0006979,GO:0008150,GO:0008152,GO:0009056,GO:0009507,GO:0009532,GO:0009536,GO:0009570,GO:0009987,GO:0010287,GO:0015994,GO:0015996,GO:0019439,GO:0033013,GO:0033015,GO:0034641,GO:0042440,GO:0043226,GO:0043227,GO:0043229,GO:0043231,GO:0044237,GO:0044248,GO:0044270,GO:0044422,GO:0044424,GO:0044434,GO:…		S	ABC1 family
MSTRG.17705	MR_inoculated	MS_control	-3.66923	4.99988	9.96444e-07	4.06365e-05	Down	Yes	XP_014509122.1		3847.GLYMA05G38510.1	CLPC1	GO:0003674,GO:0003824,GO:0004176,GO:0005575,GO:0005618,GO:0005622,GO:0005623,GO:0005737,GO:0005739,GO:0006139,GO:0006152,GO:0006163,GO:0006195,GO:0006200,GO:0006605,GO:0006725,GO:0006753,GO:0006793,GO:0006796,GO:0006807,GO:0006810,GO:0006886,GO:0006996,GO:0008104,GO:0008150,GO:0008152,GO:0008233,GO:0009056,GO:0009116,GO:0009117,GO:0009119,GO:0009123,GO:0009125,GO:0009126,GO:0009128,GO:0009141,GO:…	K03696	O	ATP-dependent Clp protease ATP-binding subunit clpA homolog
MSTRG.5463	MR_inoculated	MS_control	3.76156	4.29509	9.98136e-07	4.06365e-05	Up	Yes	XP_014495669.1		3847.GLYMA19G40310.1
MSTRG.17311	MR_inoculated	MS_control	3.76389	4.24356	1.03271e-06	4.19497e-05	Up	Yes	XP_014507160.1		3847.GLYMA05G34760.1		GO:0001071,GO:0002682,GO:0002831,GO:0003674,GO:0003676,GO:0003677,GO:0003700,GO:0005488,GO:0005575,GO:0005622,GO:0005623,GO:0005634,GO:0006355,GO:0008150,GO:0009889,GO:0010112,GO:0010337,GO:0010468,GO:0010556,GO:0010565,GO:0019219,GO:0019222,GO:0031323,GO:0031326,GO:0031347,GO:0043226,GO:0043227,GO:0043229,GO:0043231,GO:0043565,GO:0043900,GO:0044424,GO:0044464,GO:0045088,GO:0048583,GO:0050776,GO:…		S	calmodulin binding
MSTRG.8365	MR_inoculated	MS_control	-3.51937	9.42586	1.05505e-06	4.27613e-05	Down	Yes	XP_022636302.1		3847.GLYMA04G39960.2		GO:0005575,GO:0005623,GO:0005886,GO:0016020,GO:0044464,GO:0071944	K03549	P	potassium transporter
MSTRG.15099	MR_inoculated	MS_control	-3.58545	5.99099	1.0646e-06	4.30522e-05	Down	Yes	XP_022639079.1		3847.GLYMA17G17470.1				S	BTB POZ domain-containing protein
MSTRG.16129	MR_inoculated	MS_control	-3.57768	6.10887	1.07784e-06	4.34035e-05	Down	Yes	XP_014510315.1		3847.GLYMA08G14210.1		GO:0003674,GO:0003824,GO:0005575,GO:0005622,GO:0005623,GO:0005634,GO:0005737,GO:0005829,GO:0006793,GO:0006796,GO:0006950,GO:0006970,GO:0008150,GO:0008152,GO:0009628,GO:0009651,GO:0009987,GO:0016301,GO:0016310,GO:0016740,GO:0016772,GO:0043226,GO:0043227,GO:0043229,GO:0043231,GO:0044237,GO:0044424,GO:0044444,GO:0044464,GO:0050896	K14498	T	serine threonine-protein kinase
MSTRG.25756	MR_inoculated	MS_control	-3.53492	7.63288	1.07808e-06	4.34035e-05	Down	Yes	XP_014520023.1		3847.GLYMA11G08000.1		GO:0003674,GO:0003676,GO:0003677,GO:0003682,GO:0005488,GO:0005575,GO:0005622,GO:0005623,GO:0005634,GO:0006950,GO:0008150,GO:0009414,GO:0009415,GO:0009628,GO:0010035,GO:0031490,GO:0031491,GO:0031492,GO:0042221,GO:0043226,GO:0043227,GO:0043229,GO:0043231,GO:0043566,GO:0044424,GO:0044464,GO:0050896,GO:0097159,GO:1901363,GO:1901700	K11275	B	Histone H1
MSTRG.30744	MR_inoculated	MS_control	-3.52868	7.98428	1.0856e-06	4.36093e-05	Down	Yes	XP_022633119.1		3847.GLYMA13G38910.1		GO:0005575,GO:0005622,GO:0005623,GO:0005634,GO:0043226,GO:0043227,GO:0043229,GO:0043231,GO:0044424,GO:0044464		K	BEL1-like homeodomain protein
MSTRG.10693	MR_inoculated	MS_control	3.7458	4.28056	1.09461e-06	4.38738e-05	Up	Yes	XP_014499774.1		3847.GLYMA06G47110.2		GO:0000325,GO:0005575,GO:0005622,GO:0005623,GO:0005737,GO:0005773,GO:0005774,GO:0005886,GO:0008150,GO:0009607,GO:0009624,GO:0009628,GO:0009705,GO:0010035,GO:0010038,GO:0010043,GO:0016020,GO:0031090,GO:0042221,GO:0042592,GO:0043226,GO:0043227,GO:0043229,GO:0043231,GO:0044422,GO:0044424,GO:0044437,GO:0044444,GO:0044446,GO:0044464,GO:0048878,GO:0050801,GO:0050896,GO:0051704,GO:0051707,GO:0055065,GO:…		G	protein ZINC INDUCED FACILITATOR-LIKE 1-like
MSTRG.31946	MR_inoculated	MS_control	3.80336	3.97678	1.10373e-06	4.4142e-05	Up	Yes	XP_014491734.1		3847.GLYMA13G37000.1
MSTRG.1786	MR_inoculated	MS_control	-3.50982	10.1582	1.10695e-06	4.41711e-05	Down	Yes	XP_014503217.1		3847.GLYMA04G39370.1		GO:0005575,GO:0005622,GO:0005623,GO:0005737,GO:0009507,GO:0009534,GO:0009535,GO:0009536,GO:0009579,GO:0016020,GO:0031976,GO:0031984,GO:0034357,GO:0042651,GO:0043226,GO:0043227,GO:0043229,GO:0043231,GO:0044422,GO:0044424,GO:0044434,GO:0044435,GO:0044436,GO:0044444,GO:0044446,GO:0044464,GO:0055035		C	Photosystem I reaction centre subunit N (PSAN or PSI-N)
MSTRG.24304	MR_inoculated	MS_control	3.75165	4.23228	1.10934e-06	4.41711e-05	Up	Yes	XP_022643014.1		3847.GLYMA15G09720.1
MSTRG.10621	MR_inoculated	MS_control	-3.79131	4.03061	1.11752e-06	4.43993e-05	Down	Yes	XP_022637176.1		3847.GLYMA13G42550.1				K	zinc finger protein
MSTRG.1800	MR_inoculated	MS_control	3.75368	4.17841	1.15344e-06	4.56066e-05	Up	Yes
MSTRG.2205	MR_inoculated	MS_control	4.00815	3.25479	1.15414e-06	4.56066e-05	Up	Yes	XP_014500238.2		3847.GLYMA16G28860.2				T	leucine rich repeat
MSTRG.27979	MR_inoculated	MS_control	-3.81021	3.91296	1.15546e-06	4.56066e-05	Down	Yes
MSTRG.30317	MR_inoculated	MS_control	-3.70316	4.43694	1.20743e-06	4.75545e-05	Down	Yes
MSTRG.33067	MR_inoculated	MS_control	3.5907	5.39293	1.25369e-06	4.92691e-05	Up	Yes	XP_014492762.1		3847.GLYMA09G06071.1				E	Ankyrin Repeat
MSTRG.31096	MR_inoculated	MS_control	-3.68283	4.50733	1.27096e-06	4.98397e-05	Down	Yes	XP_014490710.1		3847.GLYMA19G42940.1			K00517	Q	cytochrome P450
MSTRG.18719	MR_inoculated	MS_control	-3.76755	4.00872	1.28335e-06	5.02169e-05	Down	Yes	XP_014511254.1		3847.GLYMA10G08871.1		GO:0001071,GO:0003674,GO:0003700,GO:0005575,GO:0005622,GO:0005623,GO:0005634,GO:0006355,GO:0007275,GO:0008150,GO:0009628,GO:0009653,GO:0009887,GO:0009888,GO:0009889,GO:0009890,GO:0009892,GO:0009965,GO:0010016,GO:0010073,GO:0010358,GO:0010468,GO:0010556,GO:0010558,GO:0010605,GO:0010629,GO:0019219,GO:0019222,GO:0031323,GO:0031324,GO:0031326,GO:0031327,GO:0032501,GO:0032502,GO:0043226,GO:0043227,GO:…		K	B3 domain-containing protein
MSTRG.23377	MR_inoculated	MS_control	3.55193	5.91692	1.29878e-06	5.0711e-05	Up	Yes	XP_014518005.1		3847.GLYMA17G09070.1			K11129	A	H ACA ribonucleoprotein complex subunit
MSTRG.21669	MR_inoculated	MS_control	-3.58324	5.31737	1.36228e-06	5.30761e-05	Down	Yes	XP_014516799.1		3847.GLYMA07G01130.1				K	zinc finger protein
MSTRG.10124	MR_inoculated	MS_control	3.49323	7.57741	1.37228e-06	5.33511e-05	Up	Yes	XP_022636983.1		3847.GLYMA11G20940.1				S	polyadenylate-binding protein-interacting protein
MSTRG.23736	MR_inoculated	MS_control	-3.79408	3.82549	1.37642e-06	5.33976e-05	Down	Yes	XP_014517942.1		3847.GLYMA02G00340.1		GO:0003674,GO:0003824,GO:0006082,GO:0006629,GO:0006631,GO:0006690,GO:0008150,GO:0008152,GO:0008374,GO:0009987,GO:0010327,GO:0010597,GO:0016407,GO:0016413,GO:0016740,GO:0016746,GO:0016747,GO:0019372,GO:0019752,GO:0032787,GO:0043436,GO:0044237,GO:0044238,GO:0044255,GO:0044281,GO:0044710,GO:0071704,GO:1901568	K18858,K19861	S	benzyl alcohol O-benzoyltransferase-like
MSTRG.23459	MR_inoculated	MS_control	3.77732	3.88368	1.3836e-06	5.35611e-05	Up	Yes	XP_014519049.1		3847.GLYMA18G07090.1				S	Ring finger protein
MSTRG.6219	MR_inoculated	MS_control	-3.56774	5.45649	1.4018e-06	5.41501e-05	Down	Yes	XP_022635344.1		3847.GLYMA13G41460.1		GO:0005575,GO:0005623,GO:0005886,GO:0016020,GO:0044464,GO:0071944		V	Mate efflux family protein
MSTRG.8111	MR_inoculated	MS_control	3.60889	4.91458	1.42807e-06	5.49852e-05	Up	Yes	XP_014498840.1		3847.GLYMA09G12400.3			K00485	Q	flavin-containing monooxygenase
MSTRG.925	MR_inoculated	MS_control	-3.76056	3.93634	1.43117e-06	5.49852e-05	Down	Yes	XP_014493744.1		3847.GLYMA07G11810.1	GS	GO:0005575,GO:0005622,GO:0005623,GO:0005737,GO:0044424,GO:0044464	K01915	E	glutamine synthetase
MSTRG.15384	MR_inoculated	MS_control	-3.66233	4.48847	1.43252e-06	5.49852e-05	Down	Yes	XP_014505972.1		3847.GLYMA05G03610.1				K	Transcription factor
MSTRG.16942	MR_inoculated	MS_control	-3.48702	7.5007	1.44155e-06	5.51477e-05	Down	Yes	XP_014510330.1		3847.GLYMA17G03680.1		GO:0005575,GO:0005622,GO:0005623,GO:0005737,GO:0005773,GO:0005774,GO:0006139,GO:0006396,GO:0006417,GO:0006725,GO:0006807,GO:0006996,GO:0008150,GO:0008152,GO:0009507,GO:0009526,GO:0009532,GO:0009536,GO:0009570,GO:0009657,GO:0009889,GO:0009941,GO:0009987,GO:0010467,GO:0010468,GO:0010556,GO:0010608,GO:0016020,GO:0016043,GO:0016070,GO:0019222,GO:0031090,GO:0031323,GO:0031326,GO:0031967,GO:0031975,GO:…	K12869	A	psbB mRNA maturation factor Mbb1, chloroplastic-like
MSTRG.5368	MR_inoculated	MS_control	3.72458	4.09365	1.44285e-06	5.51477e-05	Up	Yes	XP_014495505.1		3847.GLYMA03G36670.2				Q	Sex determination protein
MSTRG.7990	MR_inoculated	MS_control	-3.51689	6.30844	1.45152e-06	5.53625e-05	Down	Yes	XP_014499949.1		3847.GLYMA15G18380.1		GO:0000975,GO:0001067,GO:0001071,GO:0003674,GO:0003676,GO:0003677,GO:0003700,GO:0005488,GO:0005575,GO:0005622,GO:0005623,GO:0005634,GO:0006355,GO:0007154,GO:0007165,GO:0007623,GO:0008150,GO:0009314,GO:0009416,GO:0009628,GO:0009719,GO:0009725,GO:0009735,GO:0009739,GO:0009740,GO:0009755,GO:0009889,GO:0009909,GO:0009910,GO:0009987,GO:0010029,GO:0010033,GO:0010187,GO:0010380,GO:0010468,GO:0010476,GO:…		K	Transcription factor
MSTRG.21645	MR_inoculated	MS_control	-3.96918	3.21779	1.4597e-06	5.55575e-05	Down	Yes	XP_022641999.1		3847.GLYMA08G20770.1	OSI_23382	GO:0005575,GO:0016020	K05670	Q	ABC transporter C family member
MSTRG.28470	MR_inoculated	MS_control	3.49677	6.80964	1.47586e-06	5.60548e-05	Up	Yes	XP_014523186.1		3847.GLYMA09G38320.1
MSTRG.4297	MR_inoculated	MS_control	3.47311	8.04902	1.48901e-06	5.64361e-05	Up	Yes	XP_014519184.1		3847.GLYMA11G37610.1				G	pectate lyase activity
MSTRG.4285	MR_inoculated	MS_control	-3.45959	8.32582	1.59249e-06	6.02319e-05	Down	Yes	XP_014519093.1		3847.GLYMA11G37440.3		GO:0005575,GO:0005622,GO:0005623,GO:0005737,GO:0009507,GO:0009526,GO:0009534,GO:0009536,GO:0009579,GO:0009941,GO:0031967,GO:0031975,GO:0031976,GO:0031984,GO:0043226,GO:0043227,GO:0043229,GO:0043231,GO:0044422,GO:0044424,GO:0044434,GO:0044435,GO:0044444,GO:0044446,GO:0044464
MSTRG.3102	MR_inoculated	MS_control	-3.58019	5.00652	1.60204e-06	6.0467e-05	Down	Yes	XP_014494470.1		3847.GLYMA12G05390.1		GO:0001071,GO:0003674,GO:0003700,GO:0005575,GO:0005622,GO:0005623,GO:0005634,GO:0006355,GO:0008150,GO:0009889,GO:0010468,GO:0010556,GO:0019219,GO:0019222,GO:0031323,GO:0031326,GO:0043226,GO:0043227,GO:0043229,GO:0043231,GO:0044424,GO:0044464,GO:0050789,GO:0050794,GO:0051171,GO:0051252,GO:0060255,GO:0065007,GO:0080090,GO:2000112,GO:2001141		K	RWP-RK domain-containing protein
MSTRG.15747	MR_inoculated	MS_control	3.56305	5.10192	1.65817e-06	6.24516e-05	Up	Yes	XP_014507398.1		3847.GLYMA07G30950.1		GO:0005575,GO:0005622,GO:0005623,GO:0005634,GO:0043226,GO:0043227,GO:0043229,GO:0043231,GO:0044424,GO:0044464		S	F-Box protein
MSTRG.11991	MR_inoculated	MS_control	3.6527	4.34485	1.66222e-06	6.24516e-05	Up	Yes
MSTRG.6353	MR_inoculated	MS_control	-3.44703	9.01205	1.66496e-06	6.24516e-05	Down	Yes	XP_014497888.1		29760.VIT_06s0004g02850.t01	PIP2	GO:0005575,GO:0005623,GO:0005886,GO:0016020,GO:0044464,GO:0071944	K09872	P	plasma membrane intrinsic protein
MSTRG.16189	MR_inoculated	MS_control	3.66152	4.25476	1.71077e-06	6.40372e-05	Up	Yes	XP_022638629.1		3847.GLYMA05G30350.2				S	THN
MSTRG.11817	MR_inoculated	MS_control	3.46159	7.17003	1.71982e-06	6.42433e-05	Up	Yes	XP_014503786.1		3847.GLYMA02G41300.1		GO:0008150,GO:0009909,GO:0019222,GO:0048580,GO:0048831,GO:0050789,GO:0050793,GO:0051171,GO:0051239,GO:0065007,GO:0080164,GO:2000026,GO:2000241	K13448	T	calcium-binding protein
MSTRG.24852	MR_inoculated	MS_control	3.50679	5.78283	1.73879e-06	6.48183e-05	Up	Yes	XP_014517637.1		3847.GLYMA12G28870.1				S	Glyoxalase/Bleomycin resistance protein/Dioxygenase superfamily
MSTRG.8288	MR_inoculated	MS_control	-3.93565	3.18693	1.7685e-06	6.57906e-05	Down	Yes	XP_014501077.1		3847.GLYMA06G18890.1		GO:0003674,GO:0003824,GO:0008150,GO:0008152,GO:0008378,GO:0016740,GO:0016757,GO:0016758,GO:0047274	K06617	S	galactinol--sucrose
MSTRG.21145	MR_inoculated	MS_control	3.61325	4.52829	1.7754e-06	6.59118e-05	Up	Yes	XP_014512901.1		3847.GLYMA10G42530.2			K10740	L	DNA recombination
MSTRG.9444	MR_inoculated	MS_control	-3.58483	4.76149	1.79014e-06	6.63231e-05	Down	Yes	XP_022636699.1		3847.GLYMA04G04060.2		GO:0003674,GO:0003824,GO:0005575,GO:0005576,GO:0006629,GO:0006793,GO:0006796,GO:0006950,GO:0007154,GO:0008150,GO:0008152,GO:0008195,GO:0009267,GO:0009605,GO:0009987,GO:0009991,GO:0016020,GO:0016036,GO:0016311,GO:0016787,GO:0016788,GO:0016791,GO:0031667,GO:0031668,GO:0031669,GO:0033554,GO:0042578,GO:0042594,GO:0044237,GO:0044238,GO:0044699,GO:0044710,GO:0044763,GO:0048046,GO:0050896,GO:0051716,GO:…	K15728	I, N	Lipin family
MSTRG.33245	MR_inoculated	MS_control	3.53832	5.15668	1.8472e-06	6.82973e-05	Up	Yes	XP_014492989.1		3847.GLYMA03G22370.1
MSTRG.4759	MR_inoculated	MS_control	3.44368	7.34744	1.86934e-06	6.89751e-05	Up	Yes	XP_014495121.1		3847.GLYMA03G31460.1				B	histone h2a
MSTRG.7354	MR_inoculated	MS_control	-3.43574	7.93376	1.8748e-06	6.90361e-05	Down	Yes	XP_014498040.1		3847.GLYMA18G51380.2	SAMDC		K01611	E	S-adenosylmethionine decarboxylase proenzyme
MSTRG.14396	MR_inoculated	MS_control	3.57689	4.68551	1.93452e-06	7.10905e-05	Up	Yes	XP_014507951.1		3847.GLYMA20G04820.1			K01166	A	Ribonuclease
MSTRG.13225	MR_inoculated	MS_control	-3.5367	5.05005	1.97976e-06	7.26059e-05	Down	Yes	XP_022638245.1		3847.GLYMA16G00240.1				A	Squamous cell carcinoma antigen recognized by T-cells
MSTRG.578	MR_inoculated	MS_control	3.51779	5.21135	2.01475e-06	7.374e-05	Up	Yes	XP_014517986.1		3847.GLYMA01G00850.1		GO:0003674,GO:0003824,GO:0003840,GO:0005575,GO:0005622,GO:0005623,GO:0005737,GO:0005773,GO:0005774,GO:0006082,GO:0006518,GO:0006520,GO:0006575,GO:0006749,GO:0006751,GO:0006790,GO:0006805,GO:0006807,GO:0008150,GO:0008152,GO:0009056,GO:0009063,GO:0009410,GO:0009987,GO:0016020,GO:0016054,GO:0016740,GO:0016746,GO:0016755,GO:0016756,GO:0019752,GO:0031090,GO:0034641,GO:0042219,GO:0042221,GO:0043171,GO:…	K00681,K18592	E	gamma-glutamyltranspeptidase
MSTRG.17290	MR_inoculated	MS_control	-3.65879	4.0902	2.02251e-06	7.38747e-05	Down	Yes	XP_022639926.1		3847.GLYMA05G35190.1	OSI_08806	GO:0000325,GO:0003674,GO:0005215,GO:0005216,GO:0005253,GO:0005575,GO:0005622,GO:0005623,GO:0005737,GO:0005773,GO:0005774,GO:0006810,GO:0006811,GO:0006820,GO:0006835,GO:0008150,GO:0008509,GO:0009705,GO:0009987,GO:0015075,GO:0015267,GO:0015711,GO:0015740,GO:0015743,GO:0015849,GO:0016020,GO:0022803,GO:0022838,GO:0022857,GO:0022891,GO:0022892,GO:0031090,GO:0034220,GO:0043226,GO:0043227,GO:0043229,GO:…		K	Aluminum-activated malate transporter
MSTRG.16440	MR_inoculated	MS_control	3.7953	3.49408	2.04174e-06	7.44269e-05	Up	Yes	XP_014508193.1		3847.GLYMA13G22540.1
MSTRG.6384	MR_inoculated	MS_control	-3.51733	5.1614	2.08639e-06	7.59018e-05	Down	Yes	XP_022635429.1		3847.GLYMA12G29991.1		GO:0000003,GO:0001071,GO:0001763,GO:0003006,GO:0003674,GO:0003700,GO:0005575,GO:0005622,GO:0005623,GO:0005634,GO:0006355,GO:0007275,GO:0007389,GO:0008150,GO:0009653,GO:0009791,GO:0009887,GO:0009888,GO:0009889,GO:0009987,GO:0010016,GO:0010073,GO:0010074,GO:0010076,GO:0010077,GO:0010223,GO:0010228,GO:0010229,GO:0010346,GO:0010468,GO:0010556,GO:0019219,GO:0019222,GO:0019827,GO:0022414,GO:0030154,GO:…		K	POX
MSTRG.1673	MR_inoculated	MS_control	-3.57493	4.57146	2.12399e-06	7.7115e-05	Down	Yes
MSTRG.25096	MR_inoculated	MS_control	-3.41175	7.95909	2.14635e-06	7.77709e-05	Down	Yes	XP_014519379.1		3847.GLYMA11G01470.2		GO:0005575,GO:0005622,GO:0005623,GO:0005737,GO:0009507,GO:0009526,GO:0009534,GO:0009535,GO:0009536,GO:0009579,GO:0009941,GO:0016020,GO:0031967,GO:0031975,GO:0031976,GO:0031984,GO:0034357,GO:0042651,GO:0043226,GO:0043227,GO:0043229,GO:0043231,GO:0044422,GO:0044424,GO:0044434,GO:0044435,GO:0044436,GO:0044444,GO:0044446,GO:0044464,GO:0055035		S	PDZ
MSTRG.16343	MR_inoculated	MS_control	-3.53408	4.90588	2.15952e-06	7.80917e-05	Down	Yes	XP_014509661.1		3847.GLYMA17G12230.1		GO:0005575,GO:0005623,GO:0005886,GO:0016020,GO:0044464,GO:0071944	K15014	P	equilibrative nucleoside transporter
MSTRG.8115	MR_inoculated	MS_control	3.77456	3.47505	2.2989e-06	8.29664e-05	Up	Yes	XP_014500611.1		3847.GLYMA15G23780.1
MSTRG.16286	MR_inoculated	MS_control	3.4893	5.23227	2.33005e-06	8.39236e-05	Up	Yes	XP_014508159.1		3847.GLYMA17G12760.1				S	Rare lipoprotein A (RlpA)-like double-psi beta-barrel
MSTRG.5359	MR_inoculated	MS_control	-3.57041	4.44674	2.36752e-06	8.51039e-05	Down	Yes	XP_014495486.1		3847.GLYMA19G39521.1			K03676	O	Glutaredoxin
MSTRG.3632	MR_inoculated	MS_control	3.38488	8.95946	2.38141e-06	8.54338e-05	Up	Yes	XP_014494163.1		3847.GLYMA06G46350.1	OSI_26158		K19791	Q	L-ascorbate oxidase homolog
MSTRG.15990	MR_inoculated	MS_control	-3.73025	3.60975	2.39145e-06	8.56244e-05	Down	Yes	XP_022639356.1		3847.GLYMA06G22240.1		GO:0001071,GO:0003674,GO:0003700,GO:0005575,GO:0005622,GO:0005623,GO:0005634,GO:0006355,GO:0007275,GO:0008150,GO:0009653,GO:0009887,GO:0009889,GO:0009965,GO:0009987,GO:0010016,GO:0010468,GO:0010556,GO:0019219,GO:0019222,GO:0030154,GO:0031323,GO:0031326,GO:0032501,GO:0032502,GO:0040034,GO:0043226,GO:0043227,GO:0043229,GO:0043231,GO:0044424,GO:0044464,GO:0044699,GO:0044707,GO:0044763,GO:0044767,GO:…		K	Transcription factor
MSTRG.28828	MR_inoculated	MS_control	3.60874	4.1547	2.42404e-06	8.66199e-05	Up	Yes	XP_014523603.1		3847.GLYMA18G18870.1
MSTRG.26754	MR_inoculated	MS_control	3.78714	3.38959	2.44197e-06	8.70888e-05	Up	Yes
MSTRG.14542	MR_inoculated	MS_control	3.87317	3.13062	2.49672e-06	8.88666e-05	Up	Yes	XP_014506369.1		3847.GLYMA19G22280.1				S	UPF0481 protein
MSTRG.20801	MR_inoculated	MS_control	-3.37008	9.38256	2.53494e-06	9.00501e-05	Down	Yes	XP_014513965.1		3847.GLYMA20G28890.1	ELIP1			S	early light-induced protein
MSTRG.19015	MR_inoculated	MS_control	-3.49846	4.9317	2.57513e-06	9.12987e-05	Down	Yes	XP_014514821.1		3847.GLYMA10G06210.1
MSTRG.21536	MR_inoculated	MS_control	3.39127	7.08789	2.59851e-06	9.19477e-05	Up	Yes	XP_014516003.1		3847.GLYMA08G21790.1				Q	Isochorismatase family
MSTRG.28426	MR_inoculated	MS_control	3.65414	3.83974	2.61393e-06	9.2313e-05	Up	Yes
MSTRG.5200	MR_inoculated	MS_control	-3.39137	7.03822	2.62297e-06	9.24519e-05	Down	Yes	XP_014494675.1		3847.GLYMA19G37790.2
MSTRG.3916	MR_inoculated	MS_control	3.45095	5.45088	2.63792e-06	9.27985e-05	Up	Yes	XP_022634404.1		3847.GLYMA12G15390.1				S	Protein of unknown function (DUF688)
MSTRG.8596	MR_inoculated	MS_control	3.37195	8.16757	2.65595e-06	9.32517e-05	Up	Yes	XP_014501963.1		3847.GLYMA04G42690.1	PDI	GO:0000003,GO:0000322,GO:0000323,GO:0000325,GO:0000326,GO:0000327,GO:0003006,GO:0003674,GO:0003756,GO:0003824,GO:0005575,GO:0005618,GO:0005622,GO:0005623,GO:0005737,GO:0005773,GO:0005774,GO:0005783,GO:0005788,GO:0005794,GO:0005886,GO:0006457,GO:0006950,GO:0006970,GO:0007275,GO:0008150,GO:0008152,GO:0009505,GO:0009507,GO:0009536,GO:0009579,GO:0009628,GO:0009651,GO:0009790,GO:0009791,GO:0009987,GO:…	K09580	O	Protein disulfide isomerase
MSTRG.12805	MR_inoculated	MS_control	3.46419	5.23227	2.66909e-06	9.34216e-05	Up	Yes	XP_014503762.1		3847.GLYMA01G26840.2				S	PAR1 protein
MSTRG.25258	MR_inoculated	MS_control	3.53335	4.53443	2.6711e-06	9.34216e-05	Up	Yes	XP_014521039.1		3847.GLYMA11G03010.1	ANS	GO:0003674,GO:0003824,GO:0006725,GO:0006950,GO:0006996,GO:0007033,GO:0008150,GO:0008152,GO:0009058,GO:0009611,GO:0009698,GO:0009699,GO:0009718,GO:0009719,GO:0009725,GO:0009753,GO:0009812,GO:0009813,GO:0009987,GO:0010023,GO:0010033,GO:0016043,GO:0016491,GO:0016705,GO:0016706,GO:0018130,GO:0018958,GO:0019438,GO:0019748,GO:0042221,GO:0042440,GO:0044237,GO:0044249,GO:0044550,GO:0044699,GO:0044710,GO:…	K05277	H	anthocyanidin synthase
MSTRG.26897	MR_inoculated	MS_control	3.52816	4.56774	2.68508e-06	9.37293e-05	Up	Yes
MSTRG.20931	MR_inoculated	MS_control	-3.37721	7.54586	2.70399e-06	9.42079e-05	Down	Yes	XP_014514749.1		3847.GLYMA10G40620.1				S	seed maturation protein PM23
MSTRG.31817	MR_inoculated	MS_control	3.36333	8.35114	2.76391e-06	9.61109e-05	Up	Yes	XP_014491626.1		3847.GLYMA19G43920.1				S	GDSL esterase lipase
MSTRG.29398	MR_inoculated	MS_control	3.5485	4.34135	2.82791e-06	9.8148e-05	Up	Yes	XP_014524093.1		3847.GLYMA16G02570.1			K09422	K	Myb-like DNA-binding domain
MSTRG.21091	MR_inoculated	MS_control	3.40459	6.06635	2.85183e-06	9.87891e-05	Up	Yes	XP_014513402.1		3847.GLYMA20G24860.1
MSTRG.3814	MR_inoculated	MS_control	3.40851	5.87279	2.92701e-06	0.000101008	Up	Yes	XP_014493419.1		3847.GLYMA12G13920.1				O	glutaredoxin-C9-like
MSTRG.20396	MR_inoculated	MS_control	-3.36743	7.28723	2.92717e-06	0.000101008	Down	Yes
MSTRG.8450	MR_inoculated	MS_control	3.37032	7.07479	2.93262e-06	0.000101008	Up	Yes	XP_014500616.1		3847.GLYMA04G37320.1				S	Nodulin-like
MSTRG.18607	MR_inoculated	MS_control	3.47063	4.93562	2.94898e-06	0.000101238	Up	Yes	XP_014512909.1		3847.GLYMA18G42910.1			K09648	O	Mitochondrial inner membrane protease subunit
MSTRG.22353	MR_inoculated	MS_control	-3.39017	6.33067	2.95472e-06	0.000101238	Down	Yes	XP_014516770.1		3847.GLYMA03G22780.1				G	NmrA-like family
MSTRG.14548	MR_inoculated	MS_control	-3.63417	3.82047	2.96164e-06	0.000101238	Down	Yes	XP_014508181.1		3847.GLYMA05G14800.1		GO:0005575,GO:0016020,GO:0031224,GO:0031225,GO:0044425		S	Plastocyanin-like domain
MSTRG.20596	MR_inoculated	MS_control	3.63229	3.81977	2.96164e-06	0.000101238	Up	Yes
MSTRG.19748	MR_inoculated	MS_control	3.74969	3.35532	3.02098e-06	0.000102714	Up	Yes	XP_022641016.1		3847.GLYMA20G22240.1
MSTRG.19369	MR_inoculated	MS_control	-3.58889	4.02625	3.02196e-06	0.000102714	Down	Yes	XP_014512682.1		3847.GLYMA10G03390.1		GO:0005575,GO:0016020		P	Vicilin-like antimicrobial peptides
MSTRG.4376	MR_inoculated	MS_control	-3.37098	6.8274	3.02452e-06	0.000102714	Down	Yes	XP_014494433.1		3847.GLYMA18G02240.1	OSI_10373	GO:0003674,GO:0005215,GO:0005575,GO:0006810,GO:0006811,GO:0006820,GO:0008150,GO:0008272,GO:0008509,GO:0009987,GO:0015075,GO:0015103,GO:0015116,GO:0015698,GO:0016020,GO:0022857,GO:0022891,GO:0022892,GO:0034220,GO:0044699,GO:0044763,GO:0044765,GO:0051179,GO:0051234,GO:0055085,GO:0072348,GO:1901682	K17469	P	sulfate transporter
MSTRG.16491	MR_inoculated	MS_control	-3.35395	7.81736	3.02751e-06	0.000102714	Down	Yes	XP_014509920.1		3847.GLYMA02G36460.1	FAD6	GO:0005575,GO:0005622,GO:0005623,GO:0005737,GO:0006082,GO:0006629,GO:0006631,GO:0006633,GO:0008150,GO:0008152,GO:0008610,GO:0009058,GO:0009314,GO:0009416,GO:0009507,GO:0009526,GO:0009528,GO:0009536,GO:0009628,GO:0009642,GO:0009644,GO:0009706,GO:0009892,GO:0009941,GO:0009987,GO:0010109,GO:0010205,GO:0016020,GO:0016053,GO:0019222,GO:0019752,GO:0019866,GO:0031090,GO:0031323,GO:0031324,GO:0031967,GO:…	K10255	I	Omega-6 fatty acid desaturase
MSTRG.305	MR_inoculated	MS_control	-3.38002	6.42873	3.05568e-06	0.000103476	Down	Yes	XP_014506215.1		3847.GLYMA19G01990.2			K01099	U	type I inositol-1,4,5-trisphosphate 5-phosphatase CVP2-like
MSTRG.63	MR_inoculated	MS_control	3.35898	7.24401	3.07006e-06	0.000103769	Up	Yes
MSTRG.20624	MR_inoculated	MS_control	-3.36064	7.1293	3.09269e-06	0.00010434	Down	Yes	XP_014513599.1		3847.GLYMA10G37160.1		GO:0003674,GO:0003824,GO:0005215,GO:0005575,GO:0005622,GO:0005623,GO:0005737,GO:0005773,GO:0005774,GO:0006139,GO:0006152,GO:0006163,GO:0006195,GO:0006200,GO:0006725,GO:0006753,GO:0006793,GO:0006796,GO:0006807,GO:0006810,GO:0008150,GO:0008152,GO:0009056,GO:0009116,GO:0009117,GO:0009119,GO:0009123,GO:0009125,GO:0009126,GO:0009128,GO:0009141,GO:0009143,GO:0009144,GO:0009146,GO:0009150,GO:0009154,GO:…	K05666	Q	ABC transporter C family member
MSTRG.29158	MR_inoculated	MS_control	3.64932	3.69379	3.1278e-06	0.000105328	Up	Yes	XP_014523907.1		3847.GLYMA18G10385.1		GO:0005575,GO:0005622,GO:0005623,GO:0005737,GO:0005975,GO:0007275,GO:0008150,GO:0008152,GO:0009501,GO:0009507,GO:0009532,GO:0009536,GO:0009570,GO:0009791,GO:0032501,GO:0032502,GO:0043226,GO:0043227,GO:0043229,GO:0043231,GO:0044238,GO:0044422,GO:0044424,GO:0044434,GO:0044435,GO:0044444,GO:0044446,GO:0044464,GO:0044699,GO:0044707,GO:0071704	K00700	G	Alpha amylase, C-terminal all-beta domain
MSTRG.28138	MR_inoculated	MS_control	3.51254	4.43621	3.17448e-06	0.000106701	Up	Yes	XP_014522856.2		3847.GLYMA13G06690.1	UPTG1	GO:0000138,GO:0003674,GO:0003824,GO:0005575,GO:0005618,GO:0005622,GO:0005623,GO:0005737,GO:0005773,GO:0005774,GO:0005794,GO:0005795,GO:0005829,GO:0005840,GO:0005911,GO:0006139,GO:0006725,GO:0006753,GO:0006793,GO:0006796,GO:0006807,GO:0006950,GO:0006970,GO:0007275,GO:0008150,GO:0008152,GO:0008194,GO:0009117,GO:0009225,GO:0009506,GO:0009555,GO:0009628,GO:0009651,GO:0009832,GO:0009987,GO:0010035,GO:…	K13379	O	reversibly glycosylated polypeptide
MSTRG.6195	MR_inoculated	MS_control	-3.41798	5.4581	3.18351e-06	0.000106807	Down	Yes	XP_014496622.1		3847.GLYMA15G03670.1				C, G	UDP-glycosyltransferase 92A1-like
MSTRG.11194	MR_inoculated	MS_control	3.42292	5.3041	3.24316e-06	0.000108607	Up	Yes	XP_022637527.1		3847.GLYMA14G02000.1			K08867	T	serine threonine-protein kinase
MSTRG.23606	MR_inoculated	MS_control	3.31911	9.63363	3.39602e-06	0.000113516	Up	Yes	XP_014518850.1		3847.GLYMA18G04940.1	GAD	GO:0003674,GO:0003824,GO:0004351,GO:0005488,GO:0005515,GO:0005516,GO:0005575,GO:0005622,GO:0005623,GO:0005737,GO:0005829,GO:0008150,GO:0008152,GO:0010035,GO:0010038,GO:0016829,GO:0016830,GO:0016831,GO:0042221,GO:0044424,GO:0044444,GO:0044464,GO:0046686,GO:0050896	K01580	E	Glutamate decarboxylase
MSTRG.4054	MR_inoculated	MS_control	-3.72862	3.33502	3.43983e-06	0.000114769	Down	Yes	XP_014493595.1		3847.GLYMA12G18720.1		GO:0001071,GO:0003674,GO:0003700,GO:0005575,GO:0005622,GO:0005623,GO:0005634,GO:0006355,GO:0008150,GO:0009314,GO:0009416,GO:0009628,GO:0009637,GO:0009642,GO:0009646,GO:0009889,GO:0010468,GO:0010556,GO:0019219,GO:0019222,GO:0031323,GO:0031326,GO:0043226,GO:0043227,GO:0043229,GO:0043231,GO:0044424,GO:0044464,GO:0050789,GO:0050794,GO:0050896,GO:0051171,GO:0051252,GO:0060255,GO:0065007,GO:0080090,GO:…		K	homeobox-leucine zipper protein
MSTRG.11459	MR_inoculated	MS_control	3.60451	3.79442	3.46964e-06	0.00011555	Up	Yes	XP_014502752.1		3847.GLYMA07G18160.1		GO:0005575,GO:0005623,GO:0005886,GO:0005911,GO:0009506,GO:0016020,GO:0030054,GO:0044464,GO:0055044,GO:0071944	K14617	S	LIMR family
MSTRG.8455	MR_inoculated	MS_control	-3.67709	3.47573	3.59579e-06	0.000119445	Down	Yes	XP_014500694.1		3847.GLYMA02G42300.1		GO:0005575,GO:0005622,GO:0005623,GO:0005737,GO:0009507,GO:0009534,GO:0009535,GO:0009536,GO:0009579,GO:0016020,GO:0031976,GO:0031984,GO:0034357,GO:0042651,GO:0043226,GO:0043227,GO:0043229,GO:0043231,GO:0044422,GO:0044424,GO:0044434,GO:0044435,GO:0044436,GO:0044444,GO:0044446,GO:0044464,GO:0055035		M	Peptidase family M50
MSTRG.12492	MR_inoculated	MS_control	-3.32998	7.35733	3.59977e-06	0.000119445	Down	Yes	XP_014502508.1		3847.GLYMA12G34950.1			K13348	S	Peroxisomal membrane
MSTRG.24547	MR_inoculated	MS_control	-3.47289	4.55342	3.64176e-06	0.000120618	Down	Yes	XP_014517573.1		29760.VIT_19s0014g03130.t01		GO:0005575,GO:0005622,GO:0005623,GO:0005634,GO:0005737,GO:0005829,GO:0005886,GO:0005911,GO:0009506,GO:0016020,GO:0030054,GO:0043226,GO:0043227,GO:0043229,GO:0043231,GO:0044424,GO:0044444,GO:0044464,GO:0055044,GO:0071944		S	Stem-specific protein
MSTRG.30286	MR_inoculated	MS_control	-3.30503	8.48353	3.86296e-06	0.000127506	Down	Yes	XP_014489990.1		3847.GLYMA04G39670.1		GO:0003674,GO:0005215,GO:0006810,GO:0008150,GO:0009607,GO:0009624,GO:0050896,GO:0051179,GO:0051234,GO:0051704,GO:0051707		S	ABC transporter F family member
MSTRG.32604	MR_inoculated	MS_control	-3.32167	7.11656	3.86383e-06	0.000127506	Down	Yes	XP_014492339.1		3847.GLYMA12G36300.1		GO:0003674,GO:0005215,GO:0005575,GO:0005623,GO:0005886,GO:0005887,GO:0006810,GO:0008150,GO:0008643,GO:0009987,GO:0015144,GO:0016020,GO:0016021,GO:0022857,GO:0022891,GO:0022892,GO:0031224,GO:0031226,GO:0034219,GO:0044425,GO:0044459,GO:0044464,GO:0044699,GO:0044763,GO:0044765,GO:0051119,GO:0051179,GO:0051234,GO:0055085,GO:0071702,GO:0071944,GO:1901476	K15382	P	bidirectional sugar transporter
MSTRG.4048	MR_inoculated	MS_control	-3.49167	4.28856	3.95705e-06	0.000130345	Down	Yes	XP_022634448.1		3847.GLYMA06G35585.1		GO:0003674,GO:0003824,GO:0004838,GO:0006766,GO:0006775,GO:0008150,GO:0008152,GO:0008483,GO:0009058,GO:0009110,GO:0009987,GO:0010189,GO:0016740,GO:0016769,GO:0018130,GO:0042360,GO:0042362,GO:0044237,GO:0044249,GO:0044281,GO:0044283,GO:0044710,GO:0044711,GO:0046483,GO:0070547,GO:0071704,GO:1901360,GO:1901362,GO:1901576	K00815	E	Aminotransferase
MSTRG.21727	MR_inoculated	MS_control	-3.83226	2.95931	3.96682e-06	0.00013043	Down	Yes	XP_014516350.2		3847.GLYMA07G04145.1				S	TMV resistance protein N-like
MSTRG.10424	MR_inoculated	MS_control	-3.29782	8.76199	3.98081e-06	0.000130653	Down	Yes	XP_014501923.1		3847.GLYMA13G33710.1		GO:0003674,GO:0003824,GO:0005575,GO:0005622,GO:0005623,GO:0005737,GO:0005783,GO:0006732,GO:0006733,GO:0006743,GO:0006744,GO:0008150,GO:0008152,GO:0009058,GO:0009108,GO:0009507,GO:0009532,GO:0009536,GO:0009570,GO:0009987,GO:0016740,GO:0016765,GO:0042180,GO:0042181,GO:0042375,GO:0043226,GO:0043227,GO:0043229,GO:0043231,GO:0044237,GO:0044249,GO:0044281,GO:0044283,GO:0044422,GO:0044424,GO:0044434,GO:…	K05356	H	Solanesyl diphosphate synthase
MSTRG.22551	MR_inoculated	MS_control	3.38229	5.32904	4.00278e-06	0.000131136	Up	Yes	XP_014514988.1		3847.GLYMA17G36090.1	AMY	GO:0000272,GO:0003674,GO:0003824,GO:0004553,GO:0004556,GO:0005575,GO:0005576,GO:0005615,GO:0005975,GO:0005976,GO:0005982,GO:0005983,GO:0005984,GO:0005985,GO:0005987,GO:0006073,GO:0008150,GO:0008152,GO:0009056,GO:0009057,GO:0009251,GO:0009311,GO:0009313,GO:0009719,GO:0009725,GO:0009737,GO:0009739,GO:0009987,GO:0010033,GO:0016052,GO:0016160,GO:0016787,GO:0016798,GO:0033993,GO:0042221,GO:0043170,GO:…	K01176	G	alpha-amylase
MSTRG.4911	MR_inoculated	MS_control	-3.28948	9.94461	4.01662e-06	0.000131352	Down	Yes	XP_014495735.1		3847.GLYMA19G32070.1	CHLH	GO:0003674,GO:0003824,GO:0005575,GO:0005622,GO:0005623,GO:0005737,GO:0005739,GO:0008150,GO:0008152,GO:0009507,GO:0009526,GO:0009528,GO:0009532,GO:0009536,GO:0009570,GO:0009706,GO:0009941,GO:0010007,GO:0016020,GO:0016851,GO:0016874,GO:0019866,GO:0031090,GO:0031967,GO:0031969,GO:0031975,GO:0032991,GO:0042170,GO:0043226,GO:0043227,GO:0043229,GO:0043231,GO:0043234,GO:0044422,GO:0044424,GO:0044434,GO:…	K03403	H	chelatase subunit
MSTRG.2644	MR_inoculated	MS_control	-3.31924	6.78745	4.07289e-06	0.000132952	Down	Yes	XP_022632688.1		3847.GLYMA09G36480.3				L, T	DNA photolyase
MSTRG.29904	MR_inoculated	MS_control	3.34313	5.90869	4.1645e-06	0.000135595	Up	Yes	XP_022632825.1		3847.GLYMA17G14350.1		GO:0005575,GO:0005622,GO:0005623,GO:0005737,GO:0009507,GO:0009534,GO:0009535,GO:0009536,GO:0009579,GO:0016020,GO:0031976,GO:0031984,GO:0034357,GO:0042651,GO:0043226,GO:0043227,GO:0043229,GO:0043231,GO:0044422,GO:0044424,GO:0044434,GO:0044435,GO:0044436,GO:0044444,GO:0044446,GO:0044464,GO:0055035	K14570
MSTRG.20121	MR_inoculated	MS_control	3.38358	5.20367	4.16883e-06	0.000135595	Up	Yes	XP_014514750.1		3847.GLYMA20G35310.1		GO:0005575,GO:0005622,GO:0005623,GO:0005737,GO:0009507,GO:0009526,GO:0009536,GO:0009941,GO:0016020,GO:0031967,GO:0031975,GO:0043226,GO:0043227,GO:0043229,GO:0043231,GO:0044422,GO:0044424,GO:0044434,GO:0044435,GO:0044444,GO:0044446,GO:0044464		P	Ion channel
MSTRG.3824	MR_inoculated	MS_control	3.57044	3.76339	4.20945e-06	0.000136671	Up	Yes	XP_014493649.1		3847.GLYMA06G43940.1				D	o-methyltransferase
MSTRG.2898	MR_inoculated	MS_control	3.35476	5.61194	4.23366e-06	0.000137212	Up	Yes	XP_014493239.1		3847.GLYMA12G02460.1	UBC19	GO:0003674,GO:0003824,GO:0004842,GO:0005575,GO:0005622,GO:0005623,GO:0005634,GO:0005737,GO:0006464,GO:0006508,GO:0006511,GO:0008150,GO:0008152,GO:0008283,GO:0009056,GO:0009057,GO:0009987,GO:0016567,GO:0016874,GO:0016879,GO:0016881,GO:0019538,GO:0019787,GO:0019941,GO:0030163,GO:0032446,GO:0036211,GO:0043170,GO:0043226,GO:0043227,GO:0043229,GO:0043231,GO:0043412,GO:0043632,GO:0044237,GO:0044238,GO:…	K06688	O	ubiquitin-conjugating enzyme
MSTRG.27855	MR_inoculated	MS_control	3.58178	3.70472	4.24141e-06	0.000137217	Up	Yes
MSTRG.16444	MR_inoculated	MS_control	3.55452	3.81474	4.31251e-06	0.000139269	Up	Yes	XP_014507401.1		3847.GLYMA13G23445.1
MSTRG.2791	MR_inoculated	MS_control	3.71213	3.21713	4.32378e-06	0.000139384	Up	Yes	XP_014493473.1		3847.GLYMA11G09900.1				V	Inherit from KOG: reductase
MSTRG.24176	MR_inoculated	MS_control	-3.28948	7.80057	4.38068e-06	0.000140968	Down	Yes	XP_014518148.1		3847.GLYMA13G28120.1	MPK16	GO:0000165,GO:0003674,GO:0003824,GO:0004672,GO:0004674,GO:0004702,GO:0004707,GO:0004871,GO:0005057,GO:0005575,GO:0005622,GO:0005623,GO:0005737,GO:0005773,GO:0005886,GO:0006464,GO:0006468,GO:0006793,GO:0006796,GO:0007154,GO:0007165,GO:0007243,GO:0008150,GO:0008152,GO:0009987,GO:0016020,GO:0016301,GO:0016310,GO:0016740,GO:0016772,GO:0016773,GO:0019538,GO:0023014,GO:0023052,GO:0035556,GO:0036211,GO:…	K04371	T	mitogen-activated protein kinase
MSTRG.17049	MR_inoculated	MS_control	-3.41835	4.70814	4.41517e-06	0.000141826	Down	Yes	XP_022639779.1		3847.GLYMA07G37810.1
MSTRG.33071	MR_inoculated	MS_control	3.45368	4.34136	4.57053e-06	0.000146556	Up	Yes	XP_014492785.1		3847.GLYMA15G17390.2	OSI_17731			T	G-type lectin S-receptor-like serine threonine-protein kinase
MSTRG.2561	MR_inoculated	MS_control	-3.39141	4.86259	4.69416e-06	0.000150255	Down	Yes	XP_022640373.1		3847.GLYMA09G26840.1				Q	oxidoreductase, 2OG-Fe(II) oxygenase family protein
MSTRG.16224	MR_inoculated	MS_control	-3.27246	8.05647	4.74555e-06	0.000151631	Down	Yes	XP_014505743.1		3847.GLYMA05G30040.1		GO:0005575,GO:0005622,GO:0005623,GO:0005737,GO:0006950,GO:0008150,GO:0009507,GO:0009526,GO:0009532,GO:0009534,GO:0009535,GO:0009536,GO:0009570,GO:0009579,GO:0009611,GO:0009941,GO:0016020,GO:0031967,GO:0031975,GO:0031976,GO:0031984,GO:0034357,GO:0042651,GO:0043226,GO:0043227,GO:0043229,GO:0043231,GO:0044422,GO:0044424,GO:0044434,GO:0044435,GO:0044436,GO:0044444,GO:0044446,GO:0044464,GO:0050896,GO:…
MSTRG.21663	MR_inoculated	MS_control	3.57535	3.62642	4.75524e-06	0.000151674	Up	Yes	XP_014515741.1		3847.GLYMA08G20560.1		GO:0005575,GO:0005622,GO:0005623,GO:0005737,GO:0005739,GO:0005773,GO:0005774,GO:0008150,GO:0010035,GO:0010038,GO:0016020,GO:0031090,GO:0042221,GO:0043226,GO:0043227,GO:0043229,GO:0043231,GO:0044422,GO:0044424,GO:0044437,GO:0044444,GO:0044446,GO:0044464,GO:0046686,GO:0050896	K04077	O	chaperonin CPN60-like 2
MSTRG.12419	MR_inoculated	MS_control	3.75335	3.02122	4.8954e-06	0.00015587	Up	Yes	XP_014504272.1		3847.GLYMA17G25390.1		GO:0005575,GO:0016020	K14638	E	peptide transporter At1g52190-like
MSTRG.18407	MR_inoculated	MS_control	-3.30353	6.18989	4.92506e-06	0.000156539	Down	Yes	XP_014512367.1		3847.GLYMA02G18320.1		GO:0005575,GO:0005622,GO:0005623,GO:0005737,GO:0005829,GO:0005886,GO:0016020,GO:0044424,GO:0044444,GO:0044464,GO:0071944		S	Peptidase inhibitor I9
MSTRG.29596	MR_inoculated	MS_control	-3.25212	11.6369	4.9344e-06	0.000156561	Down	Yes	XP_014524329.1		3847.GLYMA12G04150.1		GO:0003674,GO:0003824,GO:0004332,GO:0005575,GO:0005576,GO:0005622,GO:0005623,GO:0005737,GO:0005829,GO:0005840,GO:0008150,GO:0008152,GO:0009507,GO:0009526,GO:0009532,GO:0009534,GO:0009536,GO:0009570,GO:0009579,GO:0009719,GO:0009725,GO:0009737,GO:0009941,GO:0010033,GO:0010035,GO:0010038,GO:0010287,GO:0016020,GO:0016829,GO:0016830,GO:0016832,GO:0022626,GO:0030529,GO:0031967,GO:0031975,GO:0031976,GO:…	K01623	G	fructose-bisphosphate aldolase
MSTRG.50	MR_inoculated	MS_control	-3.61998	3.42373	4.9609e-06	0.000157127	Down	Yes	XP_014490136.1		3847.GLYMA05G09070.1				Q	cytochrome P450
MSTRG.16403	MR_inoculated	MS_control	-3.3312	5.52286	4.99768e-06	0.000158016	Down	Yes	XP_022639522.1		3847.GLYMA17G11681.1		GO:0005575,GO:0005622,GO:0005623,GO:0005737,GO:0009507,GO:0009526,GO:0009536,GO:0009941,GO:0016020,GO:0031090,GO:0031967,GO:0031969,GO:0031975,GO:0042170,GO:0043226,GO:0043227,GO:0043229,GO:0043231,GO:0044422,GO:0044424,GO:0044434,GO:0044435,GO:0044444,GO:0044446,GO:0044464	K08193	G	anion transporter 6, chloroplastic-like
MSTRG.1560	MR_inoculated	MS_control	-3.25063	9.23125	5.06396e-06	0.000159832	Down	Yes	XP_014517527.1		3847.GLYMA02G07180.1	LHCA1	GO:0005575,GO:0005622,GO:0005623,GO:0005737,GO:0006091,GO:0008150,GO:0008152,GO:0009314,GO:0009416,GO:0009507,GO:0009526,GO:0009532,GO:0009534,GO:0009535,GO:0009536,GO:0009570,GO:0009579,GO:0009628,GO:0009637,GO:0009639,GO:0009765,GO:0009768,GO:0009941,GO:0009987,GO:0010114,GO:0010218,GO:0010287,GO:0015979,GO:0016020,GO:0019684,GO:0031967,GO:0031975,GO:0031976,GO:0031984,GO:0034357,GO:0042651,GO:…	K08907	O	Chlorophyll a-b binding protein
MSTRG.18090	MR_inoculated	MS_control	3.29076	6.32018	5.1044e-06	0.000160586	Up	Yes	XP_014512491.1		3847.GLYMA10G10310.1				U	MD-2-related lipid recognition domain-containing protein ML domain-containing protein
MSTRG.5322	MR_inoculated	MS_control	-3.31812	5.68763	5.11387e-06	0.000160586	Down	Yes	XP_022635021.1		3847.GLYMA19G38970.1		GO:0005575,GO:0005623,GO:0005886,GO:0006810,GO:0006833,GO:0006950,GO:0008150,GO:0009414,GO:0009415,GO:0009628,GO:0010035,GO:0010148,GO:0016020,GO:0042044,GO:0042221,GO:0044464,GO:0044699,GO:0044765,GO:0050896,GO:0051179,GO:0051234,GO:0071944,GO:1901700		Q	ABC transporter
MSTRG.24217	MR_inoculated	MS_control	-3.28076	6.68763	5.12338e-06	0.000160586	Down	Yes	XP_014519162.1		3847.GLYMA15G10700.1
MSTRG.17286	MR_inoculated	MS_control	-3.27761	6.81861	5.12619e-06	0.000160586	Down	Yes	XP_014505914.1		3847.GLYMA08G04570.1				K	Transcription factor
MSTRG.31348	MR_inoculated	MS_control	3.31213	5.75682	5.13216e-06	0.000160586	Up	Yes	XP_014491183.1		3847.GLYMA03G28120.1			K04078	O	10 kDa chaperonin-like
MSTRG.22838	MR_inoculated	MS_control	3.4024	4.56175	5.1574e-06	0.000161098	Up	Yes
MSTRG.29289	MR_inoculated	MS_control	-3.27084	6.99544	5.21573e-06	0.000162586	Down	Yes	XP_014524045.1		3847.GLYMA11G17120.1		GO:0000003,GO:0001071,GO:0003674,GO:0003700,GO:0005575,GO:0005622,GO:0005623,GO:0005634,GO:0005911,GO:0006355,GO:0008150,GO:0009506,GO:0009566,GO:0009567,GO:0009889,GO:0010468,GO:0010556,GO:0019219,GO:0019222,GO:0019953,GO:0022414,GO:0030054,GO:0031323,GO:0031326,GO:0043226,GO:0043227,GO:0043229,GO:0043231,GO:0044424,GO:0044464,GO:0044699,GO:0044702,GO:0050789,GO:0050794,GO:0051171,GO:0051252,GO:…		K	Transcription factor
MSTRG.21635	MR_inoculated	MS_control	3.46663	4.07693	5.22301e-06	0.000162586	Up	Yes	XP_014515881.1		3847.GLYMA08G20800.1				S	Phosphatase
MSTRG.2582	MR_inoculated	MS_control	-3.2695	6.74239	5.41692e-06	0.000168333	Down	Yes	XP_022632481.1		3847.GLYMA12G00310.1		GO:0005575,GO:0005622,GO:0005623,GO:0005737,GO:0005739,GO:0043226,GO:0043227,GO:0043229,GO:0043231,GO:0044424,GO:0044444,GO:0044464		S	Pentatricopeptide repeat-containing protein
MSTRG.16468	MR_inoculated	MS_control	3.40725	4.41973	5.48957e-06	0.000170299	Up	Yes	XP_014508136.2		3847.GLYMA17G08400.1		GO:0003674,GO:0003824,GO:0004553,GO:0004568,GO:0005575,GO:0005618,GO:0005623,GO:0006022,GO:0006026,GO:0006030,GO:0006032,GO:0006040,GO:0006807,GO:0006950,GO:0006970,GO:0008150,GO:0008152,GO:0008843,GO:0009056,GO:0009057,GO:0009628,GO:0009651,GO:0009719,GO:0009725,GO:0009737,GO:0009753,GO:0010033,GO:0016787,GO:0016798,GO:0030312,GO:0033993,GO:0035885,GO:0042221,GO:0043170,GO:0044464,GO:0046348,GO:…	K01183	G	K01183 chitinase EC 3.2.1.14
MSTRG.19769	MR_inoculated	MS_control	-3.26284	6.85157	5.54655e-06	0.000171772	Down	Yes	XP_022640841.1		3847.GLYMA20G22160.1	PHYA	GO:0003674,GO:0004871,GO:0004872,GO:0005575,GO:0005622,GO:0005623,GO:0005634,GO:0005654,GO:0005737,GO:0006417,GO:0007154,GO:0007165,GO:0007275,GO:0007602,GO:0008150,GO:0009314,GO:0009416,GO:0009581,GO:0009582,GO:0009583,GO:0009585,GO:0009605,GO:0009606,GO:0009628,GO:0009629,GO:0009630,GO:0009637,GO:0009638,GO:0009639,GO:0009640,GO:0009642,GO:0009791,GO:0009881,GO:0009883,GO:0009889,GO:0009890,GO:…	K12120,K12121	K	Regulatory photoreceptor which exists in two forms that are reversibly interconvertible by light the Pr form that absorbs maximally in the red region of the spectrum and the Pfr form that absorbs maximally in the far-red region
MSTRG.3297	MR_inoculated	MS_control	3.32274	5.29509	5.58481e-06	0.000172662	Up	Yes	XP_014494639.1		3847.GLYMA12G08020.1		GO:0005575,GO:0005622,GO:0005623,GO:0005634,GO:0005737,GO:0005829,GO:0043226,GO:0043227,GO:0043229,GO:0043231,GO:0044424,GO:0044444,GO:0044464	K07195	U	exocyst subunit exo70 family protein h7
MSTRG.15711	MR_inoculated	MS_control	3.32074	5.31306	5.60925e-06	0.000172941	Up	Yes	XP_014507085.1		3847.GLYMA08G06580.1		GO:0005575,GO:0005622,GO:0005623,GO:0005737,GO:0005739,GO:0016020,GO:0043226,GO:0043227,GO:0043229,GO:0043231,GO:0044424,GO:0044444,GO:0044464		S	Pentatricopeptide repeat-containing protein
MSTRG.9141	MR_inoculated	MS_control	3.63934	3.2548	5.61948e-06	0.000172941	Up	Yes	XP_014500676.1		3847.GLYMA04G06690.1				K	Transcription factor
MSTRG.6199	MR_inoculated	MS_control	3.26965	6.47262	5.62247e-06	0.000172941	Up	Yes	XP_014497676.1		15368.BRADI2G27720.1				B	histone H3
MSTRG.12156	MR_inoculated	MS_control	-3.29386	5.823	5.63573e-06	0.000172985	Down	Yes	XP_014505211.1		3847.GLYMA14G34210.1	OSI_10373	GO:0005575,GO:0016020	K17469	P	sulfate transporter
MSTRG.11192	MR_inoculated	MS_control	3.24762	7.48019	5.65e-06	0.000172985	Up	Yes	XP_014505048.1		3847.GLYMA14G02030.4				S	domain--containing protein
MSTRG.6080	MR_inoculated	MS_control	-3.23972	8.29108	5.65255e-06	0.000172985	Down	Yes	XP_014497245.1		3847.GLYMA18G40100.1		GO:0005575,GO:0005622,GO:0005623,GO:0005737,GO:0009507,GO:0009534,GO:0009535,GO:0009536,GO:0009579,GO:0016020,GO:0031976,GO:0031984,GO:0034357,GO:0042651,GO:0043226,GO:0043227,GO:0043229,GO:0043231,GO:0044422,GO:0044424,GO:0044434,GO:0044435,GO:0044436,GO:0044444,GO:0044446,GO:0044464,GO:0055035
MSTRG.1000	MR_inoculated	MS_control	-3.3118	5.4353	5.70749e-06	0.000174372	Down	Yes	XP_022639740.1		3847.GLYMA09G34480.2				S	Nucleotide-diphospho-sugar transferase
MSTRG.2856	MR_inoculated	MS_control	-3.26989	6.30034	5.81281e-06	0.000177291	Down	Yes	XP_014519401.1		3847.GLYMA11G11080.1	OSI_00064	GO:0005575,GO:0005622,GO:0005623,GO:0005737,GO:0009507,GO:0009536,GO:0043226,GO:0043227,GO:0043229,GO:0043231,GO:0044424,GO:0044444,GO:0044464		S	Protein of unknown function (DUF3067)
MSTRG.20847	MR_inoculated	MS_control	3.35908	4.74761	5.82843e-06	0.000177468	Up	Yes	XP_022641402.1		3847.GLYMA20G27400.2				T	Serine Threonine protein kinase
MSTRG.13287	MR_inoculated	MS_control	-3.4221	4.22542	5.87192e-06	0.000178316	Down	Yes
MSTRG.523	MR_inoculated	MS_control	3.40428	4.33786	5.87995e-06	0.000178316	Up	Yes	XP_022638148.1		3847.GLYMA08G06090.1		GO:0000302,GO:0003674,GO:0003824,GO:0003993,GO:0005575,GO:0005576,GO:0005623,GO:0006793,GO:0006796,GO:0006873,GO:0006950,GO:0006979,GO:0008150,GO:0008152,GO:0009986,GO:0009987,GO:0010035,GO:0016311,GO:0016787,GO:0016788,GO:0016791,GO:0019725,GO:0030002,GO:0030643,GO:0042221,GO:0042542,GO:0042578,GO:0042592,GO:0044237,GO:0044464,GO:0044699,GO:0044763,GO:0048878,GO:0050801,GO:0050896,GO:0055062,GO:…	K14379	O	Purple acid phosphatase
MSTRG.31877	MR_inoculated	MS_control	3.47874	3.86919	5.88579e-06	0.000178316	Up	Yes	XP_014491741.1		3847.GLYMA13G37621.1
MSTRG.28862	MR_inoculated	MS_control	3.68571	3.08116	5.90823e-06	0.000178697	Up	Yes	XP_014523669.1		3847.GLYMA20G14210.1		GO:0003674,GO:0003824,GO:0004797,GO:0006139,GO:0006725,GO:0006753,GO:0006793,GO:0006796,GO:0006807,GO:0008150,GO:0008152,GO:0009058,GO:0009117,GO:0009123,GO:0009124,GO:0009157,GO:0009162,GO:0009165,GO:0009987,GO:0016301,GO:0016310,GO:0016740,GO:0016772,GO:0018130,GO:0019136,GO:0019205,GO:0019206,GO:0019438,GO:0019637,GO:0034641,GO:0034654,GO:0044237,GO:0044238,GO:0044249,GO:0044271,GO:0044281,GO:…	K00857	F	thymidine kinase
MSTRG.11087	MR_inoculated	MS_control	3.37436	4.57074	5.92675e-06	0.000178958	Up	Yes	XP_022637479.1		3847.GLYMA02G47730.1				J	Ribosomal L18p/L5e family
MSTRG.3036	MR_inoculated	MS_control	3.60474	3.32022	5.99643e-06	0.000180761	Up	Yes	XP_014493431.1		3847.GLYMA11G12540.1
MSTRG.24014	MR_inoculated	MS_control	3.39446	4.36911	6.05236e-06	0.000182144	Up	Yes	XP_014516891.1		3847.GLYMA09G01590.1				S	Pentatricopeptide repeat-containing protein
MSTRG.632	MR_inoculated	MS_control	-3.39838	4.33152	6.14395e-06	0.000184594	Down	Yes	XP_014505567.1		3847.GLYMA16G08490.1				S	Senescence-associated protein
MSTRG.1550	MR_inoculated	MS_control	-3.23928	7.0808	6.17116e-06	0.000185104	Down	Yes	XP_022641341.1		3847.GLYMA19G06130.1				T	Rhomboid family
MSTRG.27618	MR_inoculated	MS_control	-3.23746	7.10628	6.21846e-06	0.000186215	Down	Yes	XP_022632058.1		3847.GLYMA06G17360.1	CLPC1	GO:0003674,GO:0003824,GO:0004176,GO:0005575,GO:0005618,GO:0005622,GO:0005623,GO:0005737,GO:0005739,GO:0006139,GO:0006152,GO:0006163,GO:0006195,GO:0006200,GO:0006605,GO:0006725,GO:0006753,GO:0006793,GO:0006796,GO:0006807,GO:0006810,GO:0006886,GO:0006996,GO:0008104,GO:0008150,GO:0008152,GO:0008233,GO:0009056,GO:0009116,GO:0009117,GO:0009119,GO:0009123,GO:0009125,GO:0009126,GO:0009128,GO:0009141,GO:…	K03696	O	ATP-dependent Clp protease ATP-binding subunit clpA homolog
MSTRG.7245	MR_inoculated	MS_control	3.22388	7.59037	6.40424e-06	0.000191461	Up	Yes	XP_014497047.2		3694.POPTR_0005s25530.1		GO:0005575,GO:0005622,GO:0005623,GO:0005634,GO:0005694,GO:0043226,GO:0043227,GO:0043228,GO:0043229,GO:0043231,GO:0043232,GO:0044424,GO:0044464	K11253	B	histone H3
MSTRG.26573	MR_inoculated	MS_control	-3.20882	8.85955	6.47013e-06	0.000193113	Down	Yes	XP_014519837.1		3847.GLYMA02G11260.1	OSI_37158	GO:0005575,GO:0005622,GO:0005623,GO:0005737,GO:0006996,GO:0008150,GO:0009507,GO:0009526,GO:0009527,GO:0009536,GO:0009657,GO:0009658,GO:0009707,GO:0009902,GO:0009941,GO:0009987,GO:0016020,GO:0016043,GO:0019867,GO:0031090,GO:0031967,GO:0031968,GO:0031969,GO:0031975,GO:0042170,GO:0043226,GO:0043227,GO:0043229,GO:0043231,GO:0044422,GO:0044424,GO:0044434,GO:0044435,GO:0044444,GO:0044446,GO:0044464,GO:…		S	Chloroplast unusual positioning
MSTRG.9847	MR_inoculated	MS_control	3.51728	3.57374	6.58746e-06	0.000196291	Up	Yes	XP_014501494.1		3694.POPTR_0004s18870.1	RC24	GO:0003674,GO:0003824,GO:0004553,GO:0004563,GO:0004568,GO:0005488,GO:0005575,GO:0005618,GO:0005622,GO:0005623,GO:0005737,GO:0005773,GO:0006040,GO:0006950,GO:0006952,GO:0008061,GO:0008150,GO:0008152,GO:0008843,GO:0009607,GO:0009620,GO:0015929,GO:0016231,GO:0016787,GO:0016798,GO:0030312,GO:0043226,GO:0043227,GO:0043229,GO:0043231,GO:0044424,GO:0044444,GO:0044464,GO:0050832,GO:0050896,GO:0051704,GO:…	K01183	G	chitinase
MSTRG.26271	MR_inoculated	MS_control	-3.20292	9.59838	6.61963e-06	0.000196926	Down	Yes	XP_014520762.1		3847.GLYMA02G04320.4	AOAT2	GO:0001666,GO:0003674,GO:0003824,GO:0004021,GO:0005575,GO:0005576,GO:0005622,GO:0005623,GO:0005737,GO:0005773,GO:0005777,GO:0006950,GO:0008150,GO:0008152,GO:0008453,GO:0008483,GO:0009058,GO:0009507,GO:0009532,GO:0009536,GO:0009570,GO:0009628,GO:0009853,GO:0009987,GO:0016020,GO:0016740,GO:0016769,GO:0036293,GO:0042579,GO:0043094,GO:0043226,GO:0043227,GO:0043229,GO:0043231,GO:0044237,GO:0044249,GO:…	K14272	E	aminotransferase
MSTRG.527	MR_inoculated	MS_control	-3.39455	4.24428	6.64862e-06	0.000197464	Down	Yes	XP_014504241.1		3847.GLYMA08G06110.1			K01054	I	hydrolase, alpha beta fold family protein
MSTRG.16623	MR_inoculated	MS_control	-3.19618	9.61641	6.87713e-06	0.000203916	Down	Yes	XP_014509248.1		3847.GLYMA13G00990.1	ATR2	GO:0003674,GO:0003824,GO:0003958,GO:0005575,GO:0005622,GO:0005623,GO:0005737,GO:0005783,GO:0005789,GO:0006725,GO:0008150,GO:0008152,GO:0009507,GO:0009536,GO:0009698,GO:0009987,GO:0012505,GO:0016020,GO:0016491,GO:0016651,GO:0016653,GO:0019748,GO:0031090,GO:0042175,GO:0043226,GO:0043227,GO:0043229,GO:0043231,GO:0044237,GO:0044422,GO:0044424,GO:0044425,GO:0044432,GO:0044444,GO:0044446,GO:0044464,GO:…	K00327	C	This enzyme is required for electron transfer from NADP to cytochrome P450 (By similarity)
MSTRG.21086	MR_inoculated	MS_control	3.55864	3.36913	6.91667e-06	0.000204754	Up	Yes	XP_022641480.1		3847.GLYMA03G30450.4				S	Coiled-coil domain-containing protein
MSTRG.14592	MR_inoculated	MS_control	3.48159	3.68278	6.93966e-06	0.000205099	Up	Yes	XP_014508223.1		3847.GLYMA19G07600.1				O	ubiquitin family
MSTRG.26207	MR_inoculated	MS_control	-3.20875	7.50147	7.06104e-06	0.000208258	Down	Yes	XP_014520806.1		3847.GLYMA09G33170.1		GO:0003674,GO:0005215,GO:0005216,GO:0005575,GO:0005622,GO:0005623,GO:0005737,GO:0006810,GO:0006811,GO:0006996,GO:0008150,GO:0009507,GO:0009526,GO:0009536,GO:0009657,GO:0009658,GO:0009941,GO:0009987,GO:0010020,GO:0015075,GO:0015267,GO:0016020,GO:0016043,GO:0022803,GO:0022838,GO:0022857,GO:0022891,GO:0022892,GO:0031090,GO:0031967,GO:0031969,GO:0031975,GO:0034220,GO:0042170,GO:0043226,GO:0043227,GO:…	K16052	M	Ion channel
MSTRG.23639	MR_inoculated	MS_control	3.27648	5.33081	7.0697e-06	0.000208258	Up	Yes	XP_014518622.1		3847.GLYMA19G42220.1	RBOHB	GO:0003674,GO:0003824,GO:0005575,GO:0005623,GO:0005886,GO:0006950,GO:0007275,GO:0008150,GO:0008152,GO:0009266,GO:0009408,GO:0009628,GO:0009791,GO:0009845,GO:0016020,GO:0016174,GO:0016491,GO:0016651,GO:0032501,GO:0032502,GO:0044464,GO:0044699,GO:0044707,GO:0044710,GO:0050664,GO:0050896,GO:0055114,GO:0071944,GO:0090351	K13447	P, Q	respiratory burst oxidase
MSTRG.30908	MR_inoculated	MS_control	-3.59966	3.21778	7.08104e-06	0.000208258	Down	Yes	XP_014490520.1		3847.GLYMA02G12220.1		GO:0000003,GO:0001071,GO:0003006,GO:0003674,GO:0003700,GO:0005575,GO:0005622,GO:0005623,GO:0005634,GO:0006355,GO:0007275,GO:0007568,GO:0008150,GO:0009791,GO:0009825,GO:0009889,GO:0009908,GO:0009987,GO:0010150,GO:0010260,GO:0010468,GO:0010556,GO:0016049,GO:0019219,GO:0019222,GO:0022414,GO:0031323,GO:0031326,GO:0032501,GO:0032502,GO:0040007,GO:0043226,GO:0043227,GO:0043229,GO:0043231,GO:0044424,GO:…		K	nac domain protein
MSTRG.7474	MR_inoculated	MS_control	3.5313	3.42967	7.27032e-06	0.000213479	Up	Yes	XP_022635817.1		3847.GLYMA18G52640.2
MSTRG.32797	MR_inoculated	MS_control	3.32061	4.68276	7.35737e-06	0.000215685	Up	Yes	XP_014492531.1		3847.GLYMA02G03560.2				S	Pfam:DUF231
MSTRG.20826	MR_inoculated	MS_control	-3.33608	4.53515	7.43496e-06	0.000217608	Down	Yes	XP_014513795.1		3847.GLYMA20G27800.1				T	Serine Threonine protein kinase
MSTRG.11557	MR_inoculated	MS_control	-3.22465	6.27855	7.4935e-06	0.000218932	Down	Yes	XP_014504634.1		3847.GLYMA14G05430.1	COP1	GO:0000003,GO:0000151,GO:0000152,GO:0003006,GO:0003674,GO:0003824,GO:0004842,GO:0005575,GO:0005622,GO:0005623,GO:0005634,GO:0005737,GO:0006139,GO:0006259,GO:0006281,GO:0006464,GO:0006725,GO:0006807,GO:0006950,GO:0006974,GO:0007275,GO:0008150,GO:0008152,GO:0009314,GO:0009416,GO:0009605,GO:0009628,GO:0009639,GO:0009640,GO:0009641,GO:0009642,GO:0009646,GO:0009647,GO:0009648,GO:0009649,GO:0009791,GO:…	K10143	O	E3 ubiquitin-protein ligase
MSTRG.1006	MR_inoculated	MS_control	-3.36287	4.29942	7.50437e-06	0.000218932	Down	Yes	XP_022639769.1		3847.GLYMA09G29580.1				S	Cotton fibre expressed protein
MSTRG.11597	MR_inoculated	MS_control	3.17533	9.84705	7.72464e-06	0.000224996	Up	Yes
MSTRG.27397	MR_inoculated	MS_control	3.45694	3.6605	7.96311e-06	0.000231569	Up	Yes	XP_022632010.1		3847.GLYMA13G03853.1				O	Carboxypeptidase
MSTRG.8805	MR_inoculated	MS_control	-3.47911	3.53819	8.23502e-06	0.000239093	Down	Yes	XP_014502479.1		3847.GLYMA04G09710.1	OSI_31684			S	DNA-binding protein
MSTRG.8189	MR_inoculated	MS_control	3.17721	7.5136	8.37208e-06	0.000242651	Up	Yes	XP_014500517.1		3847.GLYMA04G35030.1				S	Gibberellin regulated protein
MSTRG.25088	MR_inoculated	MS_control	3.2355	5.48774	8.38435e-06	0.000242651	Up	Yes	XP_014520237.1		3847.GLYMA06G17610.1		GO:0005575,GO:0006950,GO:0006970,GO:0006972,GO:0008150,GO:0009266,GO:0009409,GO:0009414,GO:0009415,GO:0009628,GO:0009651,GO:0009719,GO:0009725,GO:0009737,GO:0010033,GO:0010035,GO:0016020,GO:0033993,GO:0042221,GO:0042538,GO:0050896,GO:0097305,GO:1901700	K17279	U	HVA22-like protein e
MSTRG.9792	MR_inoculated	MS_control	3.22966	5.57818	8.4316e-06	0.000243629	Up	Yes
MSTRG.16604	MR_inoculated	MS_control	3.56367	3.18627	8.55249e-06	0.000246602	Up	Yes	XP_014508245.1		3847.GLYMA13G01070.1		GO:0001666,GO:0006950,GO:0008150,GO:0009628,GO:0009987,GO:0033554,GO:0036293,GO:0036294,GO:0042221,GO:0044699,GO:0044763,GO:0050896,GO:0051716,GO:0070482,GO:0070887,GO:0071453,GO:0071456
MSTRG.24941	MR_inoculated	MS_control	3.52019	3.33437	8.56171e-06	0.000246602	Up	Yes	XP_014519372.1		3847.GLYMA01G45250.1				S	thymocyte nuclear protein
MSTRG.12580	MR_inoculated	MS_control	-3.29466	4.65838	8.60422e-06	0.000247433	Down	Yes	XP_014503879.1		3847.GLYMA02G37490.1				T	receptor-like protein kinase
MSTRG.7989	MR_inoculated	MS_control	-3.17087	7.63036	8.65447e-06	0.000248311	Down	Yes	XP_014501136.1		3847.GLYMA15G18430.2				G	beta-galactosidase
MSTRG.24731	MR_inoculated	MS_control	3.19716	6.25476	8.66217e-06	0.000248311	Up	Yes
MSTRG.21744	MR_inoculated	MS_control	3.19443	6.28966	8.74057e-06	0.000250163	Up	Yes	XP_014516831.1		3847.GLYMA16G01060.1			K07408	Q	flavonoid 3'-monooxygenase-like
MSTRG.5798	MR_inoculated	MS_control	-3.24354	5.24241	8.77696e-06	0.000250463	Down	Yes	XP_014495171.1		3847.GLYMA04G33210.1				K	Myblike DNAbinding domain containing protein
MSTRG.27977	MR_inoculated	MS_control	3.25393	5.06425	8.77872e-06	0.000250463	Up	Yes	XP_014522717.1		3847.GLYMA18G08740.1		GO:0003674,GO:0005215,GO:0005345,GO:0005575,GO:0006810,GO:0006863,GO:0008150,GO:0009607,GO:0009624,GO:0009987,GO:0015205,GO:0015851,GO:0015931,GO:0015932,GO:0016020,GO:0022857,GO:0022891,GO:0022892,GO:0044699,GO:0044763,GO:0044765,GO:0050896,GO:0051179,GO:0051234,GO:0051704,GO:0051707,GO:0055085,GO:0071702,GO:0071705		G	purine permease
MSTRG.22199	MR_inoculated	MS_control	3.34713	4.15869	8.85328e-06	0.000252193	Up	Yes
MSTRG.12517	MR_inoculated	MS_control	-3.4655	3.52591	8.88091e-06	0.000252583	Down	Yes	XP_022637981.1		3847.GLYMA17G26520.2				P	transporter
MSTRG.795	MR_inoculated	MS_control	-3.2465	5.14341	8.95113e-06	0.000254181	Down	Yes	XP_022639020.1		3847.GLYMA13G33431.1		GO:0005575,GO:0005622,GO:0005623,GO:0005634,GO:0005737,GO:0043226,GO:0043227,GO:0043229,GO:0043231,GO:0044424,GO:0044464		K	Carbon catabolite repressor protein 4 homolog
MSTRG.5969	MR_inoculated	MS_control	3.64357	2.92169	8.98092e-06	0.000254349	Up	Yes
MSTRG.3674	MR_inoculated	MS_control	3.60982	3.01245	8.98512e-06	0.000254349	Up	Yes
MSTRG.11541	MR_inoculated	MS_control	-3.15766	8.09879	9.06203e-06	0.000255793	Down	Yes	XP_014504670.1		3847.GLYMA14G05170.1		GO:0005575,GO:0016020	K14638	P	Nitrate transporter
MSTRG.25851	MR_inoculated	MS_control	3.30608	4.4395	9.06436e-06	0.000255793	Up	Yes	XP_014521177.1		3847.GLYMA01G36430.2		GO:0005575,GO:0005622,GO:0005623,GO:0005634,GO:0043226,GO:0043227,GO:0043229,GO:0043231,GO:0044424,GO:0044464	K05868	D	G2 mitotic-specific
MSTRG.17451	MR_inoculated	MS_control	3.22451	5.39294	9.15237e-06	0.000257875	Up	Yes	XP_022639942.1		3847.GLYMA15G38010.1			K17095,K17099	U	annexin-like protein RJ4-like
MSTRG.21040	MR_inoculated	MS_control	-3.18819	6.19764	9.28763e-06	0.00026128	Down	Yes	XP_022641452.1		3847.GLYMA10G41540.2		GO:0001071,GO:0003674,GO:0003700,GO:0005575,GO:0005622,GO:0005623,GO:0005634,GO:0006355,GO:0008150,GO:0009889,GO:0010468,GO:0010556,GO:0019219,GO:0019222,GO:0031323,GO:0031326,GO:0043226,GO:0043227,GO:0043229,GO:0043231,GO:0044424,GO:0044464,GO:0050789,GO:0050794,GO:0051171,GO:0051252,GO:0060255,GO:0065007,GO:0080090,GO:2000112,GO:2001141		S	zinc finger
MSTRG.14078	MR_inoculated	MS_control	3.52418	3.24735	9.3743e-06	0.000263309	Up	Yes	XP_022638764.1		3847.GLYMA07G33590.1
MSTRG.33068	MR_inoculated	MS_control	3.40505	3.74234	9.39117e-06	0.000263374	Up	Yes	XP_014492755.1		3847.GLYMA09G06085.1				S	Ankyrin repeat-containing protein
MSTRG.18486	MR_inoculated	MS_control	-3.16135	7.21926	9.41628e-06	0.00026367	Down	Yes	XP_014514189.1		3847.GLYMA02G09640.1	OSI_09605	GO:0005575,GO:0005622,GO:0005623,GO:0005737,GO:0009507,GO:0009536,GO:0043226,GO:0043227,GO:0043229,GO:0043231,GO:0044424,GO:0044444,GO:0044464	K01724	S	Pterin 4 alpha carbinolamine dehydratase
MSTRG.20658	MR_inoculated	MS_control	3.24194	5.008	9.56058e-06	0.000267298	Up	Yes	XP_014512971.1		3847.GLYMA10G37480.1
MSTRG.26466	MR_inoculated	MS_control	3.34415	4.06426	9.625e-06	0.000268601	Up	Yes	XP_014520622.1		3847.GLYMA07G20530.1		GO:0005575,GO:0005622,GO:0005623,GO:0005634,GO:0016020,GO:0043226,GO:0043227,GO:0043229,GO:0043231,GO:0044424,GO:0044464		S	UPF0496 protein
MSTRG.32192	MR_inoculated	MS_control	-3.46579	3.44996	9.63685e-06	0.000268601	Down	Yes
MSTRG.4276	MR_inoculated	MS_control	3.25678	4.79697	9.68634e-06	0.000269566	Up	Yes	XP_014493228.2		3847.GLYMA18G01350.1	MAD2	GO:0000075,GO:0000775,GO:0000776,GO:0005575,GO:0005622,GO:0005623,GO:0005634,GO:0005635,GO:0005694,GO:0005737,GO:0007049,GO:0007088,GO:0007093,GO:0007094,GO:0007346,GO:0008150,GO:0009987,GO:0010369,GO:0010564,GO:0010639,GO:0010948,GO:0012505,GO:0022402,GO:0030071,GO:0031577,GO:0031967,GO:0031975,GO:0032991,GO:0033043,GO:0043226,GO:0043227,GO:0043228,GO:0043229,GO:0043231,GO:0043232,GO:0043234,GO:…	K02537	D	Mitotic spindle checkpoint protein
MSTRG.17373	MR_inoculated	MS_control	3.15886	6.95919	9.7526e-06	0.000270911	Up	Yes	XP_022639858.1		3847.GLYMA07G39650.3		GO:0005575,GO:0005622,GO:0005623,GO:0005634,GO:0005737,GO:0043226,GO:0043227,GO:0043229,GO:0043231,GO:0044424,GO:0044464		K	Scarecrow-like protein
MSTRG.24115	MR_inoculated	MS_control	-3.14972	7.59333	9.76457e-06	0.000270911	Down	Yes	XP_014518398.1		3847.GLYMA15G11500.1	DULL1	GO:0005575,GO:0005622,GO:0005623,GO:0005737,GO:0008150,GO:0008152,GO:0009058,GO:0009059,GO:0009501,GO:0009507,GO:0009536,GO:0010021,GO:0043170,GO:0043226,GO:0043227,GO:0043229,GO:0043231,GO:0044424,GO:0044444,GO:0044464,GO:0071704,GO:1901135,GO:1901137,GO:1901576,GO:2000896	K00703	M	starch synthase
MSTRG.24648	MR_inoculated	MS_control	-3.1773	6.20729	9.8416e-06	0.00027263	Down	Yes	XP_014517896.1		3847.GLYMA12G16560.1		GO:0001071,GO:0003674,GO:0003700,GO:0005575,GO:0005622,GO:0005623,GO:0005634,GO:0006355,GO:0008150,GO:0009889,GO:0010468,GO:0010556,GO:0019219,GO:0019222,GO:0031323,GO:0031326,GO:0043226,GO:0043227,GO:0043229,GO:0043231,GO:0044424,GO:0044464,GO:0050789,GO:0050794,GO:0051171,GO:0051252,GO:0060255,GO:0065007,GO:0080090,GO:2000112,GO:2001141		K	Transcription factor
MSTRG.26775	MR_inoculated	MS_control	-3.25007	4.84292	9.92331e-06	0.000274474	Down	Yes	XP_014521535.1		3847.GLYMA13G34300.1	GGH2	GO:0003674,GO:0003824,GO:0005575,GO:0005576,GO:0005615,GO:0005618,GO:0005622,GO:0005623,GO:0005737,GO:0005773,GO:0006082,GO:0006520,GO:0006575,GO:0006725,GO:0006732,GO:0006760,GO:0006807,GO:0008150,GO:0008152,GO:0008233,GO:0008238,GO:0008242,GO:0009987,GO:0016787,GO:0019752,GO:0030312,GO:0042558,GO:0043226,GO:0043227,GO:0043229,GO:0043231,GO:0043436,GO:0044237,GO:0044238,GO:0044281,GO:0044421,GO:…	K01307	H	gamma-glutamyl hydrolase
MSTRG.5020	MR_inoculated	MS_control	-3.23023	5.08602	9.9651e-06	0.00027521	Down	Yes	XP_022634877.1		3847.GLYMA13G18930.2	PSB28	GO:0005575,GO:0005622,GO:0005623,GO:0005737,GO:0009507,GO:0009534,GO:0009535,GO:0009536,GO:0009579,GO:0016020,GO:0031976,GO:0031984,GO:0034357,GO:0042651,GO:0043226,GO:0043227,GO:0043229,GO:0043231,GO:0044422,GO:0044424,GO:0044434,GO:0044435,GO:0044436,GO:0044444,GO:0044446,GO:0044464,GO:0055035	K08903	H	Photosystem II reaction center PSB28 protein
MSTRG.10900	MR_inoculated	MS_control	3.14093	7.83879	1.00363e-05	0.000276754	Up	Yes	XP_014501794.1		3847.GLYMA13G38040.1		GO:0003674,GO:0003824,GO:0005575,GO:0005576,GO:0005618,GO:0005623,GO:0008150,GO:0008152,GO:0016740,GO:0016757,GO:0016758,GO:0016762,GO:0030312,GO:0044464,GO:0048046,GO:0071944	K08235	G	Xyloglucan endotransglucosylase hydrolase protein
MSTRG.31464	MR_inoculated	MS_control	3.62268	2.90283	1.00686e-05	0.000277224	Up	Yes	XP_022633391.1		3847.GLYMA03G00900.2		GO:0000096,GO:0000097,GO:0003674,GO:0003824,GO:0004124,GO:0005575,GO:0005622,GO:0005623,GO:0005737,GO:0006082,GO:0006520,GO:0006534,GO:0006790,GO:0006807,GO:0008150,GO:0008152,GO:0008652,GO:0009058,GO:0009069,GO:0009070,GO:0009314,GO:0009416,GO:0009507,GO:0009536,GO:0009579,GO:0009628,GO:0009642,GO:0009643,GO:0009987,GO:0010310,GO:0015979,GO:0016053,GO:0016829,GO:0016835,GO:0019222,GO:0019344,GO:…	K01738	E	cysteine synthase
MSTRG.994	MR_inoculated	MS_control	3.47183	3.37599	1.01067e-05	0.00027785	Up	Yes	XP_014508788.1		3847.GLYMA16G34310.2	OSI_32319	GO:0001071,GO:0003674,GO:0003700,GO:0006355,GO:0008150,GO:0009889,GO:0010468,GO:0010556,GO:0019219,GO:0019222,GO:0031323,GO:0031326,GO:0050789,GO:0050794,GO:0051171,GO:0051252,GO:0060255,GO:0065007,GO:0080090,GO:2000112,GO:2001141		S	NAC domain-containing protein 74-like
MSTRG.5410	MR_inoculated	MS_control	-3.17425	6.13536	1.01382e-05	0.000278084	Down	Yes	XP_014495383.1		3847.GLYMA19G39840.1		GO:0005575,GO:0005622,GO:0005623,GO:0005737,GO:0005773,GO:0005794,GO:0005886,GO:0016020,GO:0043226,GO:0043227,GO:0043229,GO:0043231,GO:0044424,GO:0044444,GO:0044464,GO:0071944		T	Universal stress protein
MSTRG.20808	MR_inoculated	MS_control	-3.29565	4.356	1.01459e-05	0.000278084	Down	Yes	XP_014512808.1		3847.GLYMA20G28830.1		GO:0005575,GO:0005576,GO:0007275,GO:0008150,GO:0008544,GO:0009653,GO:0009791,GO:0009886,GO:0009888,GO:0009913,GO:0009987,GO:0010016,GO:0010052,GO:0010103,GO:0010374,GO:0030154,GO:0030855,GO:0032501,GO:0032502,GO:0043588,GO:0044699,GO:0044707,GO:0044763,GO:0044767,GO:0048367,GO:0048513,GO:0048731,GO:0048856,GO:0048869,GO:0060429		S	epidermal patterning factor-like protein
MSTRG.7584	MR_inoculated	MS_control	3.48868	3.30594	1.01886e-05	0.000278832	Up	Yes
MSTRG.30354	MR_inoculated	MS_control	-3.12835	8.85296	1.0209e-05	0.000278969	Down	Yes	XP_022632972.1		3847.GLYMA06G17520.1				K	sugar transporter
MSTRG.6040	MR_inoculated	MS_control	3.32504	4.09366	1.03442e-05	0.000282238	Up	Yes	XP_014496998.1		3847.GLYMA18G40480.2			K08081	Q	Tropinone reductase
MSTRG.11941	MR_inoculated	MS_control	-3.14126	7.35819	1.04108e-05	0.000283372	Down	Yes	XP_014505180.1		3847.GLYMA02G40360.1		GO:0005575,GO:0005622,GO:0005623,GO:0005634,GO:0008150,GO:0009314,GO:0009416,GO:0009605,GO:0009606,GO:0009628,GO:0009637,GO:0009638,GO:0032501,GO:0043226,GO:0043227,GO:0043229,GO:0043231,GO:0044424,GO:0044464,GO:0044699,GO:0044707,GO:0050896		S	Root phototropism protein
MSTRG.11375	MR_inoculated	MS_control	-3.33182	4.05216	1.04171e-05	0.000283372	Down	Yes	XP_014502838.1		3847.GLYMA02G45150.1	PIL6	GO:0001071,GO:0003674,GO:0003676,GO:0003677,GO:0003700,GO:0005488,GO:0005575,GO:0005622,GO:0005623,GO:0005634,GO:0006355,GO:0007154,GO:0007165,GO:0007275,GO:0007602,GO:0008150,GO:0008152,GO:0009058,GO:0009314,GO:0009416,GO:0009581,GO:0009582,GO:0009583,GO:0009585,GO:0009605,GO:0009628,GO:0009639,GO:0009640,GO:0009692,GO:0009693,GO:0009704,GO:0009791,GO:0009889,GO:0009966,GO:0009987,GO:0010017,GO:…	K16189	K	transcription factor
MSTRG.891	MR_inoculated	MS_control	3.61212	2.89331	1.06661e-05	0.000289712	Up	Yes	XP_014506062.1		3847.GLYMA09G30770.1				S	zinc finger protein VAR3, chloroplastic-like
MSTRG.11415	MR_inoculated	MS_control	-3.28125	4.38007	1.07505e-05	0.000291568	Down	Yes
MSTRG.807	MR_inoculated	MS_control	-3.65119	2.79507	1.07707e-05	0.000291679	Down	Yes
MSTRG.1849	MR_inoculated	MS_control	3.51985	3.14675	1.08836e-05	0.000293856	Up	Yes	XP_014497769.1		3847.GLYMA16G27290.1				T	FHA
MSTRG.21641	MR_inoculated	MS_control	3.51985	3.14675	1.08836e-05	0.000293856	Up	Yes
MSTRG.20615	MR_inoculated	MS_control	-3.13433	7.1855	1.09737e-05	0.000295848	Down	Yes	XP_014514767.1		3847.GLYMA20G30620.1		GO:0000272,GO:0003674,GO:0003824,GO:0005575,GO:0005622,GO:0005623,GO:0005634,GO:0005737,GO:0005829,GO:0005975,GO:0005976,GO:0005982,GO:0005983,GO:0005984,GO:0005985,GO:0005986,GO:0006073,GO:0006793,GO:0006796,GO:0008150,GO:0008152,GO:0009056,GO:0009057,GO:0009058,GO:0009251,GO:0009311,GO:0009312,GO:0009719,GO:0009725,GO:0009737,GO:0009743,GO:0009746,GO:0009750,GO:0009987,GO:0010033,GO:0015979,GO:…	K03841	G	K03841 fructose-1,6-bisphosphatase I EC 3.1.3.11
MSTRG.22326	MR_inoculated	MS_control	3.54338	3.06429	1.10146e-05	0.000296071	Up	Yes
MSTRG.29177	MR_inoculated	MS_control	3.54338	3.06429	1.10146e-05	0.000296071	Up	Yes	XP_014523930.1		3847.GLYMA10G39240.1				S	ERG2 and Sigma1 receptor like protein
MSTRG.1234	MR_inoculated	MS_control	3.41045	3.5497	1.10476e-05	0.000296519	Up	Yes	XP_014508988.1		3847.GLYMA19G03570.1
MSTRG.5950	MR_inoculated	MS_control	-3.42391	3.48843	1.11769e-05	0.000299543	Down	Yes	XP_014495469.1		3847.GLYMA06G24770.1				S	zinc finger Ran-binding domain-containing protein 2-like
MSTRG.5567	MR_inoculated	MS_control	-3.35621	3.81542	1.11965e-05	0.000299627	Down	Yes	XP_014495221.1		3847.GLYMA19G41200.1
MSTRG.9715	MR_inoculated	MS_control	-3.10745	10.0011	1.13222e-05	0.000302542	Down	Yes	NP_001304079.1		3847.GLYMA04G01920.1	CAT1	GO:0000302,GO:0003674,GO:0003824,GO:0004096,GO:0004601,GO:0005488,GO:0005575,GO:0005576,GO:0005618,GO:0005622,GO:0005623,GO:0005737,GO:0005739,GO:0005773,GO:0005777,GO:0005829,GO:0005840,GO:0005886,GO:0005911,GO:0006950,GO:0006979,GO:0006995,GO:0007154,GO:0008150,GO:0008152,GO:0009056,GO:0009266,GO:0009267,GO:0009314,GO:0009409,GO:0009416,GO:0009506,GO:0009507,GO:0009514,GO:0009526,GO:0009532,GO:…	K03781	P	Occurs in almost all aerobically respiring organisms and serves to protect cells from the toxic effects of hydrogen peroxide (By similarity)
MSTRG.779	MR_inoculated	MS_control	3.2049	5.06425	1.13635e-05	0.0003032	Up	Yes
MSTRG.7448	MR_inoculated	MS_control	-3.1843	5.37325	1.15287e-05	0.000307156	Down	Yes	XP_022635270.1		3847.GLYMA16G13570.1		GO:0001071,GO:0003674,GO:0003700,GO:0005575,GO:0005622,GO:0005623,GO:0005634,GO:0006355,GO:0008150,GO:0009314,GO:0009411,GO:0009416,GO:0009628,GO:0009889,GO:0010224,GO:0010468,GO:0010556,GO:0019219,GO:0019222,GO:0031323,GO:0031326,GO:0043226,GO:0043227,GO:0043229,GO:0043231,GO:0044424,GO:0044464,GO:0050789,GO:0050794,GO:0050896,GO:0051171,GO:0051252,GO:0060255,GO:0065007,GO:0080090,GO:0080167,GO:…	K16241	K	Transcription factor
MSTRG.10052	MR_inoculated	MS_control	3.2204	4.81725	1.15913e-05	0.000308368	Up	Yes	XP_014500173.1		3847.GLYMA11G25540.1		GO:0003674,GO:0003824,GO:0005575,GO:0005622,GO:0005623,GO:0005737,GO:0006996,GO:0008150,GO:0008152,GO:0009295,GO:0009507,GO:0009536,GO:0009579,GO:0009657,GO:0009987,GO:0015035,GO:0015036,GO:0016043,GO:0016491,GO:0016651,GO:0016667,GO:0016668,GO:0019725,GO:0042592,GO:0043226,GO:0043227,GO:0043229,GO:0043231,GO:0044424,GO:0044444,GO:0044464,GO:0044699,GO:0044710,GO:0044763,GO:0045454,GO:0047134,GO:…		O	thioredoxin-like protein CITRX
MSTRG.16726	MR_inoculated	MS_control	-3.11575	7.86321	1.1612e-05	0.000308466	Down	Yes	XP_014510027.1		3847.GLYMA17G06060.1		GO:0005575,GO:0005622,GO:0005623,GO:0005737,GO:0009507,GO:0009536,GO:0043226,GO:0043227,GO:0043229,GO:0043231,GO:0044424,GO:0044444,GO:0044464	K08234	S	Glyoxalase/Bleomycin resistance protein/Dioxygenase superfamily
MSTRG.13446	MR_inoculated	MS_control	3.56028	2.96779	1.17826e-05	0.000312542	Up	Yes	XP_022637458.1		3847.GLYMA17G38070.2				S	Complex 1 protein (LYR family)
MSTRG.10745	MR_inoculated	MS_control	3.26027	4.36223	1.19562e-05	0.000316683	Up	Yes	XP_014498653.1		3847.GLYMA06G47560.1			K13989	S	Der1-like family
MSTRG.32275	MR_inoculated	MS_control	3.4079	3.47507	1.20813e-05	0.000319528	Up	Yes	XP_014492050.2		3847.GLYMA18G38720.1				S	Embryo-specific protein 3, (ATS3)
MSTRG.8442	MR_inoculated	MS_control	-3.45833	3.27758	1.21613e-05	0.000321174	Down	Yes	XP_022636314.1		3847.GLYMA04G37391.1		GO:0000003,GO:0001071,GO:0003006,GO:0003674,GO:0003700,GO:0005575,GO:0005622,GO:0005623,GO:0005634,GO:0006355,GO:0007275,GO:0008150,GO:0009791,GO:0009889,GO:0009908,GO:0010468,GO:0010556,GO:0019219,GO:0019222,GO:0022414,GO:0031323,GO:0031326,GO:0032501,GO:0032502,GO:0043226,GO:0043227,GO:0043229,GO:0043231,GO:0044424,GO:0044464,GO:0044699,GO:0044707,GO:0044767,GO:0048367,GO:0048437,GO:0048438,GO:…		K	Squamosa promoter-binding-like protein
MSTRG.3985	MR_inoculated	MS_control	3.35718	3.69928	1.22401e-05	0.000322786	Up	Yes	XP_022634416.1		3847.GLYMA06G36076.1	OSI_20472			J	ribosomal protein L11
MSTRG.13370	MR_inoculated	MS_control	-3.1077	7.68072	1.22716e-05	0.000323145	Down	Yes	XP_022638303.1		3847.GLYMA17G36860.2
MSTRG.342	MR_inoculated	MS_control	3.14496	5.88006	1.23758e-05	0.000325418	Up	Yes	XP_014502810.1		3847.GLYMA19G02180.1		GO:0000003,GO:0003006,GO:0003674,GO:0003824,GO:0005575,GO:0005622,GO:0005623,GO:0005737,GO:0005739,GO:0005783,GO:0006139,GO:0006152,GO:0006163,GO:0006195,GO:0006200,GO:0006725,GO:0006753,GO:0006793,GO:0006796,GO:0006807,GO:0007275,GO:0008150,GO:0008152,GO:0009056,GO:0009116,GO:0009117,GO:0009119,GO:0009123,GO:0009125,GO:0009126,GO:0009128,GO:0009141,GO:0009143,GO:0009144,GO:0009146,GO:0009150,GO:…	K08900	O	AAA-type ATPase family protein
MSTRG.31892	MR_inoculated	MS_control	3.55017	2.95868	1.24499e-05	0.000326891	Up	Yes
MSTRG.25425	MR_inoculated	MS_control	-3.09629	8.48709	1.25807e-05	0.000329846	Down	Yes	XP_014521501.1		3847.GLYMA11G04660.1	OSI_09601
MSTRG.16165	MR_inoculated	MS_control	3.09857	7.93735	1.26412e-05	0.000330955	Up	Yes	XP_014507528.1		3847.GLYMA05G31310.1		GO:0005575,GO:0005622,GO:0005623,GO:0005737,GO:0005773,GO:0005774,GO:0005886,GO:0009507,GO:0009534,GO:0009535,GO:0009536,GO:0009579,GO:0016020,GO:0031090,GO:0031976,GO:0031984,GO:0034357,GO:0042651,GO:0043226,GO:0043227,GO:0043229,GO:0043231,GO:0044422,GO:0044424,GO:0044434,GO:0044435,GO:0044436,GO:0044437,GO:0044444,GO:0044446,GO:0044464,GO:0055035,GO:0071944		S	wound stress protein
MSTRG.17292	MR_inoculated	MS_control	-3.31687	3.88917	1.27081e-05	0.000332225	Down	Yes	XP_014505676.1		3847.GLYMA05G35180.1	OSI_08806	GO:0000325,GO:0003674,GO:0005215,GO:0005216,GO:0005253,GO:0005575,GO:0005622,GO:0005623,GO:0005737,GO:0005773,GO:0005774,GO:0006810,GO:0006811,GO:0006820,GO:0006835,GO:0008150,GO:0008509,GO:0009705,GO:0009987,GO:0015075,GO:0015267,GO:0015711,GO:0015740,GO:0015743,GO:0015849,GO:0016020,GO:0022803,GO:0022838,GO:0022857,GO:0022891,GO:0022892,GO:0031090,GO:0034220,GO:0043226,GO:0043227,GO:0043229,GO:…		K	Aluminum-activated malate transporter
MSTRG.29749	MR_inoculated	MS_control	-3.2103	4.72703	1.28487e-05	0.000335418	Down	Yes	XP_022632768.1		3847.GLYMA06G43820.1			K06207	J	GTP-binding protein typA bipA
MSTRG.3572	MR_inoculated	MS_control	3.2688	4.17451	1.28992e-05	0.000336253	Up	Yes	XP_014492126.1		3847.GLYMA11G18070.1		GO:0005575,GO:0005623,GO:0005886,GO:0016020,GO:0044464,GO:0071944		S	Expp1 protein
MSTRG.14652	MR_inoculated	MS_control	3.53998	2.94953	1.31589e-05	0.000342529	Up	Yes	XP_014508215.1		3847.GLYMA05G28250.1		GO:0005575,GO:0005576	K13899	O	Cysteine proteinase inhibitor
MSTRG.10254	MR_inoculated	MS_control	-3.11615	6.4163	1.32253e-05	0.000343551	Down	Yes	XP_014501442.1		3847.GLYMA08G17110.2		GO:0005575,GO:0005622,GO:0005623,GO:0005737,GO:0009507,GO:0009536,GO:0016020,GO:0043226,GO:0043227,GO:0043229,GO:0043231,GO:0044424,GO:0044444,GO:0044464		Q	ABC transporter D family member 2
MSTRG.19646	MR_inoculated	MS_control	-3.27667	4.09434	1.32361e-05	0.000343551	Down	Yes	XP_014511779.2		3847.GLYMA03G06580.1		GO:0005575,GO:0005623,GO:0005886,GO:0007154,GO:0007165,GO:0007275,GO:0008150,GO:0009719,GO:0009725,GO:0009737,GO:0009738,GO:0009755,GO:0009791,GO:0009845,GO:0009987,GO:0010033,GO:0016020,GO:0023052,GO:0032501,GO:0032502,GO:0032870,GO:0033993,GO:0042221,GO:0044464,GO:0044699,GO:0044700,GO:0044707,GO:0044763,GO:0050789,GO:0050794,GO:0050896,GO:0051716,GO:0065007,GO:0070887,GO:0071215,GO:0071310,GO:…		T	Lectin-domain containing receptor kinase
MSTRG.15460	MR_inoculated	MS_control	3.17911	4.97453	1.34593e-05	0.0003488	Up	Yes	XP_014509890.1		3847.GLYMA17G13780.3		GO:0005575,GO:0005622,GO:0005623,GO:0005737,GO:0009507,GO:0009536,GO:0043226,GO:0043227,GO:0043229,GO:0043231,GO:0044424,GO:0044444,GO:0044464		A, K	ribonuclease J-like
MSTRG.24807	MR_inoculated	MS_control	3.56909	2.85458	1.34768e-05	0.0003488	Up	Yes	XP_022642794.1		3847.GLYMA15G05400.1				T	mitogen-activated protein kinase kinase kinase
MSTRG.3574	MR_inoculated	MS_control	-3.20129	4.71896	1.35081e-05	0.00034911	Down	Yes	XP_014519186.1		3847.GLYMA12G10100.1		GO:0005575,GO:0005622,GO:0005623,GO:0005737,GO:0009507,GO:0009536,GO:0043226,GO:0043227,GO:0043229,GO:0043231,GO:0044424,GO:0044444,GO:0044464		S	protein FAF-like, chloroplastic-like
MSTRG.11261	MR_inoculated	MS_control	-3.07455	10.8161	1.35518e-05	0.000349741	Down	Yes	XP_014505019.1		3847.GLYMA14G02500.1	VTC2	GO:0000302,GO:0003674,GO:0003824,GO:0004645,GO:0005575,GO:0005622,GO:0005623,GO:0005634,GO:0005737,GO:0005975,GO:0005996,GO:0006082,GO:0006766,GO:0006767,GO:0006950,GO:0006952,GO:0006979,GO:0008150,GO:0008152,GO:0008194,GO:0008905,GO:0008928,GO:0009058,GO:0009110,GO:0009266,GO:0009408,GO:0009607,GO:0009617,GO:0009628,GO:0009719,GO:0009725,GO:0009753,GO:0009987,GO:0010033,GO:0010035,GO:0010193,GO:…	K14190	S	GDP-L-galactose phosphorylase
MSTRG.19560	MR_inoculated	MS_control	3.14094	5.57372	1.35925e-05	0.000350292	Up	Yes
MSTRG.20162	MR_inoculated	MS_control	3.11221	6.28784	1.37086e-05	0.000352783	Up	Yes	XP_022641019.1		3702.AT3G23450.1
MSTRG.4089	MR_inoculated	MS_control	3.16666	5.09365	1.37393e-05	0.000353071	Up	Yes	XP_014494409.1		59689.fgenesh2_kg.8__1917__AT5G59690.1				B	Core component of nucleosome. Nucleosomes wrap and compact DNA into chromatin, limiting DNA accessibility to the cellular machineries which require DNA as a template. Histones thereby play a central role in transcription regulation, DNA repair, DNA replication and chromosomal stability. DNA accessibility is regulated via a complex set of post-translational modifications of histones, also called h…
MSTRG.14071	MR_inoculated	MS_control	-3.07482	8.80802	1.37977e-05	0.00035407	Down	Yes	XP_014510220.1		3847.GLYMA07G33570.1	NIR	GO:0003674,GO:0003824,GO:0005575,GO:0005576,GO:0005622,GO:0005623,GO:0005737,GO:0005739,GO:0008150,GO:0008152,GO:0009507,GO:0009532,GO:0009536,GO:0009570,GO:0010035,GO:0010167,GO:0016020,GO:0016491,GO:0016661,GO:0016662,GO:0042221,GO:0043226,GO:0043227,GO:0043229,GO:0043231,GO:0044422,GO:0044424,GO:0044434,GO:0044435,GO:0044444,GO:0044446,GO:0044464,GO:0044710,GO:0048046,GO:0050421,GO:0050896,GO:…	K00366	P	reductase
MSTRG.8760	MR_inoculated	MS_control	-3.2486	4.23675	1.38239e-05	0.00035424	Down	Yes	XP_022636458.1		3847.GLYMA15G17870.1			K18469	U	microtubule-associated protein
MSTRG.8604	MR_inoculated	MS_control	-3.07187	9.8035	1.38471e-05	0.000354334	Down	Yes	XP_014498578.1		3847.GLYMA04G42870.1	PSBS	GO:0003674,GO:0005488,GO:0005575,GO:0005622,GO:0005623,GO:0005737,GO:0006996,GO:0008150,GO:0008289,GO:0009314,GO:0009416,GO:0009503,GO:0009507,GO:0009517,GO:0009534,GO:0009535,GO:0009536,GO:0009579,GO:0009628,GO:0009657,GO:0009668,GO:0009987,GO:0010027,GO:0010196,GO:0016020,GO:0016043,GO:0016044,GO:0016168,GO:0019840,GO:0030076,GO:0031409,GO:0031976,GO:0031984,GO:0032991,GO:0034357,GO:0042651,GO:…	K03542	I	Photosystem II 22 kDa protein
MSTRG.15021	MR_inoculated	MS_control	3.52972	2.94031	1.39125e-05	0.000355476	Up	Yes	XP_022639054.1		3847.GLYMA17G19570.1				K	HLH
MSTRG.28531	MR_inoculated	MS_control	-3.47653	3.10674	1.3931e-05	0.000355476	Down	Yes	XP_014523273.1		3847.GLYMA03G05245.1				S	Methyltransferase domain
MSTRG.14072	MR_inoculated	MS_control	-3.19994	4.63284	1.41685e-05	0.000361028	Down	Yes	XP_014505768.1		3847.GLYMA07G33560.1	CYP707A4	GO:0003674,GO:0003824,GO:0004497,GO:0005575,GO:0008150,GO:0008152,GO:0010295,GO:0016020,GO:0016491,GO:0016705,GO:0016709,GO:0044710,GO:0055114	K09843	Q	Abscisic acid 8'-hydroxylase
MSTRG.15760	MR_inoculated	MS_control	3.09041	6.95348	1.42402e-05	0.000362344	Up	Yes	XP_014506994.1		3847.GLYMA16G07450.1		GO:0005575,GO:0005576,GO:0005618,GO:0005623,GO:0005911,GO:0009505,GO:0009506,GO:0030054,GO:0030312,GO:0044464,GO:0055044,GO:0071944		I	GDSL esterase lipase
MSTRG.2183	MR_inoculated	MS_control	3.44761	3.17846	1.42614e-05	0.000362376	Up	Yes	XP_014504480.1		3847.GLYMA04G30630.2	OSI_30760	GO:0000413,GO:0003674,GO:0003755,GO:0003824,GO:0005488,GO:0005527,GO:0005528,GO:0005575,GO:0006464,GO:0008144,GO:0008150,GO:0008152,GO:0009987,GO:0016020,GO:0016853,GO:0016859,GO:0018193,GO:0018208,GO:0019538,GO:0036211,GO:0043170,GO:0043412,GO:0044237,GO:0044238,GO:0044260,GO:0044267,GO:0071704,GO:0097159,GO:1901363	K14826	O	Peptidyl-prolyl cis-trans isomerase
MSTRG.14617	MR_inoculated	MS_control	-3.09395	6.76345	1.42926e-05	0.00036266	Down	Yes	XP_014509915.1		3847.GLYMA01G02570.1	ELI3-2	GO:0003674,GO:0003824,GO:0006725,GO:0008150,GO:0008152,GO:0009058,GO:0009607,GO:0009617,GO:0009698,GO:0009699,GO:0009808,GO:0009809,GO:0009987,GO:0016491,GO:0016614,GO:0016616,GO:0019438,GO:0019748,GO:0044237,GO:0044249,GO:0044550,GO:0044710,GO:0044711,GO:0045551,GO:0047681,GO:0050896,GO:0051704,GO:0051707,GO:0055114,GO:0071704,GO:1901360,GO:1901362,GO:1901576	K00083	Q	Cinnamyl alcohol dehydrogenase
MSTRG.17916	MR_inoculated	MS_control	3.14653	5.26957	1.4397e-05	0.000364798	Up	Yes
MSTRG.8101	MR_inoculated	MS_control	-3.09816	6.43201	1.45566e-05	0.00036808	Down	Yes	XP_022636205.1		3847.GLYMA15G24680.1		GO:0005575,GO:0005622,GO:0005623,GO:0005737,GO:0009507,GO:0009526,GO:0009534,GO:0009535,GO:0009536,GO:0009579,GO:0009941,GO:0016020,GO:0031967,GO:0031975,GO:0031976,GO:0031984,GO:0034357,GO:0042651,GO:0043226,GO:0043227,GO:0043229,GO:0043231,GO:0044422,GO:0044424,GO:0044434,GO:0044435,GO:0044436,GO:0044444,GO:0044446,GO:0044464,GO:0055035	K00939	F	Adenylate kinase family protein
MSTRG.29764	MR_inoculated	MS_control	-3.11233	5.99654	1.45672e-05	0.00036808	Down	Yes	XP_014524520.1		3847.GLYMA04G38480.1	OSI_35274	GO:0005575,GO:0016020		S	CBS domain-containing protein
MSTRG.14101	MR_inoculated	MS_control	3.15717	5.06425	1.45931e-05	0.000368222	Up	Yes	XP_014507199.2		3847.GLYMA02G11640.1	UGT73B5	GO:0003674,GO:0003824,GO:0005575,GO:0005622,GO:0005623,GO:0005737,GO:0005829,GO:0008150,GO:0008152,GO:0008194,GO:0009607,GO:0016740,GO:0016757,GO:0016758,GO:0035251,GO:0044424,GO:0044444,GO:0044464,GO:0046527,GO:0050896,GO:0051704,GO:0051707,GO:0080043,GO:0080044		C, G	flavonol 3-O-glucosyltransferase activity
MSTRG.14195	MR_inoculated	MS_control	-3.52126	2.93164	1.47137e-05	0.00036972	Down	Yes	XP_022640152.1		3847.GLYMA07G34870.1		GO:0003674,GO:0003824,GO:0005215,GO:0005575,GO:0005623,GO:0005886,GO:0006139,GO:0006152,GO:0006163,GO:0006195,GO:0006200,GO:0006725,GO:0006753,GO:0006793,GO:0006796,GO:0006807,GO:0006810,GO:0006811,GO:0006817,GO:0006820,GO:0008150,GO:0008152,GO:0008509,GO:0009056,GO:0009116,GO:0009117,GO:0009119,GO:0009123,GO:0009125,GO:0009126,GO:0009128,GO:0009141,GO:0009143,GO:0009144,GO:0009146,GO:0009150,GO:…	K08176	P	phosphate transporter
MSTRG.5637	MR_inoculated	MS_control	3.51939	2.93103	1.47137e-05	0.00036972	Up	Yes	XP_014495310.1		3847.GLYMA11G33310.1				S	Pentatricopeptide repeat-containing protein
MSTRG.17411	MR_inoculated	MS_control	3.51939	2.93103	1.47137e-05	0.00036972	Up	Yes	XP_014508104.1		3847.GLYMA07G39260.1
MSTRG.9060	MR_inoculated	MS_control	3.181	4.72901	1.47756e-05	0.000370471	Up	Yes	XP_014498556.1		3847.GLYMA06G07330.1		GO:0001071,GO:0003674,GO:0003700,GO:0005575,GO:0005622,GO:0005623,GO:0005634,GO:0006355,GO:0006950,GO:0006952,GO:0007154,GO:0007165,GO:0008150,GO:0009414,GO:0009415,GO:0009607,GO:0009620,GO:0009628,GO:0009719,GO:0009725,GO:0009737,GO:0009753,GO:0009755,GO:0009867,GO:0009889,GO:0009987,GO:0010033,GO:0010035,GO:0010118,GO:0010468,GO:0010556,GO:0019219,GO:0019222,GO:0023052,GO:0031323,GO:0031326,GO:…		K	HOX
MSTRG.20668	MR_inoculated	MS_control	-3.1657	4.93865	1.47845e-05	0.000370471	Down	Yes	XP_014511234.1		3847.GLYMA10G37610.2				P, Q	Ferric-chelate reductase
MSTRG.8968	MR_inoculated	MS_control	-3.14185	5.24615	1.50181e-05	0.000375804	Down	Yes	XP_014502414.1		3847.GLYMA06G08220.2			K17609	O	protein-disulfide reductase activity
MSTRG.15059	MR_inoculated	MS_control	-3.19448	4.56845	1.50388e-05	0.000375805	Down	Yes	XP_014507791.1		3847.GLYMA05G21620.1				S	Zinc finger protein
MSTRG.19143	MR_inoculated	MS_control	3.34049	3.55575	1.51487e-05	0.000378028	Up	Yes	XP_014513019.1		3847.GLYMA03G32610.1			K06995	S	Protein of unknown function (DUF861)
MSTRG.22269	MR_inoculated	MS_control	3.07307	7.28101	1.52037e-05	0.000378878	Up	Yes	XP_014515140.1		3847.GLYMA07G12741.1		GO:0005575,GO:0005622,GO:0005623,GO:0005737,GO:0005783,GO:0005789,GO:0012505,GO:0016020,GO:0031090,GO:0042175,GO:0043226,GO:0043227,GO:0043229,GO:0043231,GO:0044422,GO:0044424,GO:0044425,GO:0044432,GO:0044444,GO:0044446,GO:0044464	K15404	I	WAX2 C-terminal domain
MSTRG.16969	MR_inoculated	MS_control	-3.14621	5.13535	1.5226e-05	0.000378913	Down	Yes	XP_014507285.1		3847.GLYMA07G37120.1				S	Inherit from NOG: epimerase dehydratase
MSTRG.24136	MR_inoculated	MS_control	3.25399	4.02992	1.53272e-05	0.000380909	Up	Yes	XP_014518649.1		3847.GLYMA15G11290.2	BGLU47		K05350	G	beta-glucosidase
MSTRG.32626	MR_inoculated	MS_control	-3.11702	5.6228	1.54115e-05	0.000382478	Down	Yes	XP_014492359.1		3847.GLYMA10G06080.2				K	auxin response factor
MSTRG.4308	MR_inoculated	MS_control	3.3485	3.49409	1.55241e-05	0.000384748	Up	Yes	XP_014492955.1		3847.GLYMA11G37820.1			K00737	G	glycosyl transferase family 17 protein
MSTRG.5056	MR_inoculated	MS_control	-3.51085	2.9223	1.55659e-05	0.000385256	Down	Yes	XP_014494931.1		3847.GLYMA19G36430.2		GO:0001071,GO:0003674,GO:0003700,GO:0005575,GO:0005622,GO:0005623,GO:0005634,GO:0006355,GO:0007275,GO:0008150,GO:0009888,GO:0009889,GO:0010073,GO:0010075,GO:0010468,GO:0010556,GO:0019219,GO:0019222,GO:0022622,GO:0030856,GO:0031323,GO:0031326,GO:0032501,GO:0032502,GO:0040008,GO:0043226,GO:0043227,GO:0043229,GO:0043231,GO:0044424,GO:0044464,GO:0044699,GO:0044707,GO:0044767,GO:0045595,GO:0045604,GO:…		K	zinc finger protein
MSTRG.8885	MR_inoculated	MS_control	3.07402	6.94429	1.55957e-05	0.000385466	Up	Yes	XP_014499803.1		3847.GLYMA04G08901.1		GO:0001071,GO:0003674,GO:0003676,GO:0003677,GO:0003700,GO:0005488,GO:0005575,GO:0005622,GO:0005623,GO:0005634,GO:0006355,GO:0008150,GO:0009889,GO:0009891,GO:0009893,GO:0010468,GO:0010556,GO:0010557,GO:0010604,GO:0010628,GO:0019219,GO:0019222,GO:0031323,GO:0031325,GO:0031326,GO:0031328,GO:0043226,GO:0043227,GO:0043229,GO:0043231,GO:0043565,GO:0044424,GO:0044464,GO:0045893,GO:0045935,GO:0048518,GO:…	K09286	K	Dehydration-responsive element-binding protein
MSTRG.21502	MR_inoculated	MS_control	3.11574	5.55119	1.56393e-05	0.000386019	Up	Yes	XP_014516084.1		3847.GLYMA08G22370.1
MSTRG.29756	MR_inoculated	MS_control	3.18664	4.50036	1.6044e-05	0.000395469	Up	Yes	XP_014524516.1		3847.GLYMA04G38590.1	BGAL10	GO:0005575,GO:0005576,GO:0005618,GO:0005623,GO:0008150,GO:0009505,GO:0009628,GO:0030312,GO:0044464,GO:0048046,GO:0050896,GO:0071944,GO:0080167		G	beta-galactosidase
MSTRG.13487	MR_inoculated	MS_control	-3.08508	6.13434	1.64593e-05	0.000404786	Down	Yes	XP_014504624.1		3847.GLYMA17G37740.2
MSTRG.29109	MR_inoculated	MS_control	-3.42304	3.15537	1.64667e-05	0.000404786	Down	Yes
MSTRG.24528	MR_inoculated	MS_control	3.1796	4.49407	1.6679e-05	0.00040945	Up	Yes	XP_022642490.1		3847.GLYMA15G07990.2			K10666	O	E3 ubiquitin-protein ligase RMA1H1-like
MSTRG.9786	MR_inoculated	MS_control	3.09195	5.70878	1.70879e-05	0.00041892	Up	Yes	XP_014500136.1		3847.GLYMA06G00820.1				S	39 kDa EF-Hand containing protein
MSTRG.8497	MR_inoculated	MS_control	3.52474	2.81478	1.71219e-05	0.000419186	Up	Yes	NP_001304248.1		3847.GLYMA04G36470.1		GO:0005575,GO:0005622,GO:0005623,GO:0005737,GO:0005783,GO:0043226,GO:0043227,GO:0043229,GO:0043231,GO:0044424,GO:0044444,GO:0044464	K16292	O	Cysteine
MSTRG.9610	MR_inoculated	MS_control	-3.12093	5.17126	1.71739e-05	0.000419893	Down	Yes	XP_014501990.2		3847.GLYMA04G02440.1	OSI_31804	GO:0003674,GO:0003824,GO:0004175,GO:0004252,GO:0005575,GO:0005576,GO:0005618,GO:0005623,GO:0008150,GO:0008152,GO:0008233,GO:0008236,GO:0016787,GO:0017171,GO:0030312,GO:0044464,GO:0048046,GO:0070011,GO:0071944		O	subtilisin-like
MSTRG.23818	MR_inoculated	MS_control	-3.16432	4.601	1.72518e-05	0.000421228	Down	Yes	XP_014516955.1		3847.GLYMA09G03090.1		GO:0000003,GO:0000741,GO:0003006,GO:0005575,GO:0005618,GO:0005623,GO:0005911,GO:0006996,GO:0006997,GO:0007275,GO:0008150,GO:0009506,GO:0009553,GO:0009559,GO:0009561,GO:0009790,GO:0009791,GO:0009793,GO:0009987,GO:0010154,GO:0010197,GO:0016043,GO:0022414,GO:0030054,GO:0030154,GO:0030312,GO:0032501,GO:0032502,GO:0044464,GO:0044699,GO:0044707,GO:0044763,GO:0044767,GO:0048229,GO:0048284,GO:0048316,GO:…		C	domain-containing protein
MSTRG.12279	MR_inoculated	MS_control	-3.0448	7.71796	1.73424e-05	0.000422467	Down	Yes	XP_022637868.1		3847.GLYMA13G01810.1	CRY1	GO:0000166,GO:0000302,GO:0000304,GO:0001558,GO:0001882,GO:0001883,GO:0003674,GO:0003824,GO:0004672,GO:0004871,GO:0004872,GO:0005488,GO:0005524,GO:0005575,GO:0005622,GO:0005623,GO:0005634,GO:0005737,GO:0006464,GO:0006468,GO:0006793,GO:0006796,GO:0006873,GO:0006874,GO:0006875,GO:0006950,GO:0006979,GO:0007154,GO:0007165,GO:0007275,GO:0007623,GO:0008150,GO:0008152,GO:0008219,GO:0009314,GO:0009414,GO:…	K12118,K12119	L, T	cryptochrome
MSTRG.24978	MR_inoculated	MS_control	3.11837	5.15072	1.73492e-05	0.000422467	Up	Yes	XP_014520127.1		3847.GLYMA01G45050.1		GO:0005575,GO:0005623,GO:0005886,GO:0016020,GO:0031224,GO:0031225,GO:0044425,GO:0044464,GO:0071944		S	gpi-anchored protein
MSTRG.26861	MR_inoculated	MS_control	-3.0289	9.53822	1.76438e-05	0.000429065	Down	Yes	XP_014521647.1		3847.GLYMA18G27710.2		GO:0002376,GO:0003674,GO:0003676,GO:0003723,GO:0003727,GO:0003824,GO:0004372,GO:0005488,GO:0005575,GO:0005576,GO:0005622,GO:0005623,GO:0005634,GO:0005737,GO:0005739,GO:0005759,GO:0005829,GO:0005840,GO:0005886,GO:0006950,GO:0006952,GO:0006955,GO:0008150,GO:0008152,GO:0008187,GO:0008219,GO:0008266,GO:0009058,GO:0009266,GO:0009409,GO:0009507,GO:0009526,GO:0009532,GO:0009534,GO:0009536,GO:0009570,GO:…	K00600	E	Interconversion of serine and glycine (By similarity)
MSTRG.21895	MR_inoculated	MS_control	3.08505	5.66328	1.79164e-05	0.00043511	Up	Yes	XP_022641741.1		3847.GLYMA07G06420.1	SPA1	GO:0000003,GO:0000151,GO:0003006,GO:0005575,GO:0005622,GO:0005623,GO:0005634,GO:0005654,GO:0006996,GO:0007154,GO:0007165,GO:0007275,GO:0007602,GO:0008150,GO:0009314,GO:0009416,GO:0009581,GO:0009582,GO:0009583,GO:0009585,GO:0009605,GO:0009628,GO:0009639,GO:0009640,GO:0009648,GO:0009657,GO:0009658,GO:0009791,GO:0009987,GO:0010017,GO:0010099,GO:0010100,GO:0010114,GO:0010218,GO:0010228,GO:0016043,GO:…	K16240	J	Protein SUPPRESSOR OF PHYA-105
MSTRG.9206	MR_inoculated	MS_control	-3.06187	6.35167	1.80286e-05	0.000437247	Down	Yes	XP_014502359.2		3847.GLYMA06G06370.1		GO:0005575,GO:0005622,GO:0005623,GO:0005737,GO:0006605,GO:0006810,GO:0006886,GO:0008104,GO:0008150,GO:0009507,GO:0009526,GO:0009528,GO:0009536,GO:0009706,GO:0009941,GO:0009987,GO:0015031,GO:0016020,GO:0016482,GO:0019866,GO:0031090,GO:0031967,GO:0031969,GO:0031975,GO:0033036,GO:0033365,GO:0034613,GO:0042170,GO:0043226,GO:0043227,GO:0043229,GO:0043231,GO:0044422,GO:0044424,GO:0044434,GO:0044435,GO:…		P	pheophorbide a oxygenase
MSTRG.30141	MR_inoculated	MS_control	3.07134	5.96092	1.81031e-05	0.000438469	Up	Yes	XP_014489697.1		3847.GLYMA19G31760.2		GO:0005575,GO:0016020		G	Sugar phosphate phosphate translocator
MSTRG.3190	MR_inoculated	MS_control	-3.12961	4.83547	1.8569e-05	0.000448614	Down	Yes	XP_022634145.1		3847.GLYMA11G14290.2		GO:0000003,GO:0000041,GO:0003006,GO:0003674,GO:0005215,GO:0005375,GO:0005488,GO:0005515,GO:0005575,GO:0005622,GO:0005623,GO:0005737,GO:0005773,GO:0005886,GO:0005887,GO:0006810,GO:0006811,GO:0006812,GO:0006825,GO:0007275,GO:0007276,GO:0008150,GO:0008324,GO:0008643,GO:0009555,GO:0009987,GO:0015075,GO:0015144,GO:0016020,GO:0016021,GO:0019953,GO:0022412,GO:0022414,GO:0022622,GO:0022857,GO:0022890,GO:…	K14686	P	copper transporter
MSTRG.1543	MR_inoculated	MS_control	3.08406	5.5375	1.85715e-05	0.000448614	Up	Yes	XP_014507628.1		3847.GLYMA04G37570.1	TIM8	GO:0005575,GO:0005622,GO:0005623,GO:0005737,GO:0005739,GO:0005740,GO:0005758,GO:0031967,GO:0031970,GO:0031974,GO:0031975,GO:0043226,GO:0043227,GO:0043229,GO:0043231,GO:0044422,GO:0044424,GO:0044429,GO:0044444,GO:0044446,GO:0044464	K17780	U	Mitochondrial import inner membrane translocase subunit
MSTRG.20620	MR_inoculated	MS_control	3.34369	3.3414	1.86153e-05	0.000449072	Up	Yes
MSTRG.22575	MR_inoculated	MS_control	3.32758	3.40309	1.8738e-05	0.000451432	Up	Yes	XP_022642064.1		3847.GLYMA03G12220.2		GO:0007275,GO:0008150,GO:0009790,GO:0032501,GO:0032502,GO:0044699,GO:0044707,GO:0044767,GO:0048856,GO:0050789,GO:0050794,GO:0051726,GO:0065007	K18813	D	cell division
MSTRG.15272	MR_inoculated	MS_control	3.14596	4.58561	1.88909e-05	0.000454511	Up	Yes	XP_014508177.1		3847.GLYMA17G15310.1			K09286	K	Transcription factor
MSTRG.12630	MR_inoculated	MS_control	-3.54526	2.6999	1.9071e-05	0.000458236	Down	Yes	XP_014503899.1		3847.GLYMA14G23820.1				I	GDSL-like Lipase/Acylhydrolase
MSTRG.7410	MR_inoculated	MS_control	-3.05725	6.1191	1.9174e-05	0.000460096	Down	Yes	XP_014497923.1		3847.GLYMA18G51970.1				T	PHOsphatase
MSTRG.24501	MR_inoculated	MS_control	-3.03116	7.30168	1.91992e-05	0.000460096	Down	Yes	XP_014517555.1		3847.GLYMA13G31060.1				S	Auxin-repressed 12.5 kDa
MSTRG.252	MR_inoculated	MS_control	-3.50391	2.79506	1.93402e-05	0.000462863	Down	Yes
MSTRG.31316	MR_inoculated	MS_control	-3.12122	4.82799	1.94476e-05	0.000464818	Down	Yes	XP_014490869.1		3847.GLYMA0048S00310.1				O	aspartic
MSTRG.14149	MR_inoculated	MS_control	-3.06467	5.81922	1.94965e-05	0.000465373	Down	Yes	XP_014510507.1		3847.GLYMA20G02080.1		GO:0005575,GO:0016020	K17471	P	sulfate transporter
MSTRG.10061	MR_inoculated	MS_control	3.059	5.83849	1.98134e-05	0.000472315	Up	Yes
MSTRG.29352	MR_inoculated	MS_control	-3.18953	4.10263	2.01584e-05	0.000479908	Down	Yes	XP_014524091.1		3847.GLYMA16G02200.2		GO:0000003,GO:0001071,GO:0003006,GO:0003674,GO:0003700,GO:0005575,GO:0005622,GO:0005623,GO:0005634,GO:0006355,GO:0006725,GO:0007275,GO:0008150,GO:0008152,GO:0009058,GO:0009698,GO:0009699,GO:0009791,GO:0009808,GO:0009809,GO:0009832,GO:0009834,GO:0009889,GO:0009891,GO:0009893,GO:0009900,GO:0009901,GO:0009908,GO:0009987,GO:0010047,GO:0010468,GO:0010556,GO:0010557,GO:0010604,GO:0010628,GO:0019219,GO:…		K	NAC domain-containing protein
MSTRG.30100	MR_inoculated	MS_control	-3.31435	3.39024	2.03365e-05	0.000483484	Down	Yes	XP_014489729.1		3847.GLYMA03G28590.1				G	strictosidine synthase
MSTRG.31103	MR_inoculated	MS_control	-3.53299	2.68893	2.0362e-05	0.000483484	Down	Yes	XP_022633246.1		3847.GLYMA03G06854.1				T	resistance protein
MSTRG.4175	MR_inoculated	MS_control	-3.30029	3.44995	2.03897e-05	0.000483508	Down	Yes	XP_022634499.1		3847.GLYMA12G34990.1		GO:0001071,GO:0003674,GO:0003700,GO:0005575,GO:0005622,GO:0005623,GO:0005634,GO:0006355,GO:0008150,GO:0009889,GO:0010468,GO:0010556,GO:0019219,GO:0019222,GO:0031323,GO:0031326,GO:0043226,GO:0043227,GO:0043229,GO:0043231,GO:0044424,GO:0044464,GO:0050789,GO:0050794,GO:0051171,GO:0051252,GO:0060255,GO:0065007,GO:0080090,GO:2000112,GO:2001141		K	nac domain
MSTRG.17089	MR_inoculated	MS_control	-3.0128	7.97186	2.04175e-05	0.000483534	Down	Yes	XP_014509186.1		3847.GLYMA07G38260.1	DXS1	GO:0003674,GO:0003824,GO:0005575,GO:0005622,GO:0005623,GO:0005737,GO:0006081,GO:0006082,GO:0006090,GO:0006629,GO:0006644,GO:0006720,GO:0006725,GO:0006778,GO:0006779,GO:0006793,GO:0006796,GO:0006807,GO:0008150,GO:0008152,GO:0008299,GO:0008610,GO:0008654,GO:0008661,GO:0009058,GO:0009240,GO:0009507,GO:0009532,GO:0009536,GO:0009570,GO:0009987,GO:0015994,GO:0015995,GO:0016740,GO:0016744,GO:0018130,GO:…	K01662	H	synthase
MSTRG.6647	MR_inoculated	MS_control	3.09986	4.92633	2.06825e-05	0.000489171	Up	Yes	XP_014496582.1		3847.GLYMA19G27260.1				S	GEM-like protein
MSTRG.25953	MR_inoculated	MS_control	-3.45766	2.87468	2.07249e-05	0.000489535	Down	Yes	XP_022631443.1		3847.GLYMA09G35170.1
MSTRG.22279	MR_inoculated	MS_control	3.0166	7.15569	2.0938e-05	0.000493924	Up	Yes	XP_014516709.1		3847.GLYMA03G23890.1		GO:0003674,GO:0003824,GO:0005575,GO:0005622,GO:0005623,GO:0005634,GO:0005737,GO:0005829,GO:0005886,GO:0005911,GO:0006950,GO:0006979,GO:0008150,GO:0008152,GO:0009506,GO:0010035,GO:0010038,GO:0016020,GO:0016491,GO:0016627,GO:0016628,GO:0030054,GO:0032440,GO:0042221,GO:0043226,GO:0043227,GO:0043229,GO:0043231,GO:0044424,GO:0044444,GO:0044464,GO:0044710,GO:0046686,GO:0050896,GO:0055044,GO:0055114,GO:…	K07119,K08070,K19825	S	NADP-dependent alkenal double bond reductase
MSTRG.7678	MR_inoculated	MS_control	-3.05727	5.62423	2.11718e-05	0.000498791	Down	Yes	XP_014499029.1		3847.GLYMA19G45060.3		GO:0005575,GO:0005622,GO:0005623,GO:0005634,GO:0006139,GO:0006396,GO:0006725,GO:0006807,GO:0007275,GO:0008150,GO:0008152,GO:0009892,GO:0009987,GO:0010033,GO:0010467,GO:0010468,GO:0010605,GO:0010608,GO:0010629,GO:0014070,GO:0016070,GO:0016441,GO:0016458,GO:0019222,GO:0031047,GO:0031050,GO:0032501,GO:0032502,GO:0034641,GO:0035194,GO:0035195,GO:0035196,GO:0040029,GO:0042221,GO:0043170,GO:0043226,GO:…	K11592	A	endoribonuclease Dicer
MSTRG.8557	MR_inoculated	MS_control	-3.08856	5.00207	2.15404e-05	0.000506814	Down	Yes	XP_022636335.1		3847.GLYMA06G12400.1		GO:0005575,GO:0005623,GO:0005886,GO:0016020,GO:0044464,GO:0071944		O	tetrachloro-p-hydroquinone reductive
MSTRG.22850	MR_inoculated	MS_control	3.1421	4.36223	2.15968e-05	0.000507482	Up	Yes	XP_014515003.1		3847.GLYMA01G29150.2		GO:0001071,GO:0003674,GO:0003700,GO:0003824,GO:0005575,GO:0005622,GO:0005623,GO:0005634,GO:0006139,GO:0006163,GO:0006355,GO:0006725,GO:0006753,GO:0006790,GO:0006793,GO:0006796,GO:0006807,GO:0008150,GO:0008152,GO:0009117,GO:0009150,GO:0009259,GO:0009889,GO:0009987,GO:0010468,GO:0010556,GO:0016787,GO:0016817,GO:0016819,GO:0019219,GO:0019222,GO:0019637,GO:0019693,GO:0031323,GO:0031326,GO:0034641,GO:…	K10863	K	Transcription factor
MSTRG.11699	MR_inoculated	MS_control	3.05871	5.45576	2.16868e-05	0.000508937	Up	Yes	XP_014505425.1		3847.GLYMA11G35050.1		GO:0002376,GO:0005575,GO:0005622,GO:0005623,GO:0005737,GO:0006950,GO:0006952,GO:0006955,GO:0006979,GO:0008150,GO:0009607,GO:0009617,GO:0009751,GO:0009814,GO:0009816,GO:0010033,GO:0014070,GO:0042221,GO:0042742,GO:0044424,GO:0044464,GO:0045087,GO:0050896,GO:0051704,GO:0051707,GO:1901700		S	defense response
MSTRG.14083	MR_inoculated	MS_control	-3.06316	5.39703	2.17384e-05	0.000509488	Down	Yes	XP_022638767.1		3847.GLYMA07G33600.4	BZIP71	GO:0000975,GO:0001067,GO:0001071,GO:0003674,GO:0003676,GO:0003677,GO:0003700,GO:0005488,GO:0005575,GO:0005622,GO:0005623,GO:0005634,GO:0006355,GO:0006950,GO:0006970,GO:0007154,GO:0007165,GO:0008150,GO:0009414,GO:0009415,GO:0009628,GO:0009651,GO:0009719,GO:0009725,GO:0009737,GO:0009738,GO:0009755,GO:0009889,GO:0009987,GO:0010033,GO:0010035,GO:0010468,GO:0010556,GO:0019219,GO:0019222,GO:0023052,GO:…	K14432	K	Transcription factor
MSTRG.589	MR_inoculated	MS_control	3.19535	3.93101	2.18486e-05	0.000511409	Up	Yes	XP_022638465.1		3847.GLYMA07G14910.2				S	IQ calmodulin-binding motif family protein, expressed
MSTRG.6528	MR_inoculated	MS_control	3.47898	2.77386	2.18781e-05	0.000511439	Up	Yes	XP_014497029.1		3847.GLYMA08G46520.1				Q	Cytochrome p450
MSTRG.2654	MR_inoculated	MS_control	3.02533	6.2104	2.2202e-05	0.000518341	Up	Yes	XP_014494508.1		3847.GLYMA20G34630.1		GO:0005575,GO:0005622,GO:0005623,GO:0005634,GO:0005730,GO:0005737,GO:0005829,GO:0031974,GO:0031981,GO:0043226,GO:0043227,GO:0043228,GO:0043229,GO:0043231,GO:0043232,GO:0043233,GO:0044422,GO:0044424,GO:0044428,GO:0044444,GO:0044446,GO:0044464,GO:0070013	K11096	A	Small nuclear ribonucleoprotein
MSTRG.480	MR_inoculated	MS_control	3.01607	6.57148	2.23058e-05	0.000520096	Up	Yes
MSTRG.24434	MR_inoculated	MS_control	3.03565	5.85207	2.23808e-05	0.000521173	Up	Yes	XP_014517880.1		3847.GLYMA13G30500.1		GO:0005575,GO:0005576,GO:0005622,GO:0005623,GO:0005737,GO:0005773,GO:0043226,GO:0043227,GO:0043229,GO:0043231,GO:0044424,GO:0044444,GO:0044464		I	GDSL esterase lipase
MSTRG.31397	MR_inoculated	MS_control	-2.98381	10.2088	2.25253e-05	0.000523864	Down	Yes	XP_014491316.1		3847.GLYMA19G30350.1	CRD1	GO:0003674,GO:0003676,GO:0003677,GO:0003824,GO:0004497,GO:0005488,GO:0005575,GO:0005622,GO:0005623,GO:0005737,GO:0008150,GO:0008152,GO:0009507,GO:0009526,GO:0009528,GO:0009534,GO:0009535,GO:0009536,GO:0009579,GO:0009706,GO:0009941,GO:0016020,GO:0016491,GO:0016705,GO:0016709,GO:0019866,GO:0031090,GO:0031967,GO:0031969,GO:0031975,GO:0031976,GO:0031984,GO:0034357,GO:0042170,GO:0042651,GO:0043226,GO:…	K04035	H	Magnesium-protoporphyrin IX monomethyl ester oxidative cyclase
MSTRG.31745	MR_inoculated	MS_control	3.05367	5.38957	2.26664e-05	0.000526118	Up	Yes	XP_014491530.1		3847.GLYMA03G41910.1		GO:0001071,GO:0003674,GO:0003700,GO:0005575,GO:0005622,GO:0005623,GO:0005634,GO:0006355,GO:0008150,GO:0009889,GO:0010468,GO:0010556,GO:0019219,GO:0019222,GO:0031323,GO:0031326,GO:0043226,GO:0043227,GO:0043229,GO:0043231,GO:0044424,GO:0044464,GO:0050789,GO:0050794,GO:0051171,GO:0051252,GO:0060255,GO:0065007,GO:0080090,GO:2000112,GO:2001141	K09286	K	Transcription factor
MSTRG.11624	MR_inoculated	MS_control	3.0099	6.7081	2.26909e-05	0.000526118	Up	Yes	XP_022637682.1		3847.GLYMA14G05980.2				S	Inherit from euNOG: Polyadenylate-binding protein-interacting protein
MSTRG.17851	MR_inoculated	MS_control	-3.22717	3.69993	2.27093e-05	0.000526118	Down	Yes
MSTRG.30364	MR_inoculated	MS_control	3.2764	3.42968	2.29687e-05	0.000531447	Up	Yes	XP_014490100.1		3847.GLYMA08G08040.1		GO:0006139,GO:0006396,GO:0006399,GO:0006400,GO:0006725,GO:0006807,GO:0008033,GO:0008150,GO:0008152,GO:0009116,GO:0009119,GO:0009451,GO:0009987,GO:0010467,GO:0016070,GO:0034470,GO:0034641,GO:0034660,GO:0042278,GO:0043170,GO:0043412,GO:0044237,GO:0044238,GO:0044260,GO:0044281,GO:0044710,GO:0046128,GO:0046483,GO:0055086,GO:0071704,GO:0072521,GO:0080180,GO:0090304,GO:1901068,GO:1901135,GO:1901360,GO:…	K15430	L	tRNA guanosine-2'-O-methyltransferase TRM11 homolog
MSTRG.18366	MR_inoculated	MS_control	3.40506	2.94031	2.32807e-05	0.000537979	Up	Yes	XP_022640478.1		3847.GLYMA15G37900.2				T	LRR receptor-like serine threonine-protein kinase
MSTRG.26301	MR_inoculated	MS_control	2.99914	6.92047	2.35216e-05	0.000542855	Up	Yes
MSTRG.12968	MR_inoculated	MS_control	3.23669	3.59153	2.36398e-05	0.000544888	Up	Yes	XP_014504142.1		3711.Bra006077.1-P				S	Protein of unknown function (DUF1336)
MSTRG.24847	MR_inoculated	MS_control	3.03688	5.56625	2.36699e-05	0.000544889	Up	Yes
MSTRG.22105	MR_inoculated	MS_control	-3.02891	5.78742	2.3744e-05	0.000545902	Down	Yes	XP_014516487.1		3847.GLYMA16G34740.1				S	Domain of unknown function (DUF3411)
MSTRG.26405	MR_inoculated	MS_control	-3.01792	6.06496	2.38982e-05	0.000548241	Down	Yes	XP_014521337.1		3847.GLYMA02G02680.1		GO:0003674,GO:0005215,GO:0005575,GO:0005623,GO:0005886,GO:0006810,GO:0006811,GO:0006820,GO:0008150,GO:0008509,GO:0009987,GO:0015075,GO:0015103,GO:0015112,GO:0015698,GO:0015706,GO:0016020,GO:0022857,GO:0022891,GO:0022892,GO:0034220,GO:0044464,GO:0044699,GO:0044763,GO:0044765,GO:0051179,GO:0051234,GO:0055085,GO:0071705,GO:0071944,GO:0080054,GO:0080055		P	Nitrate transporter
MSTRG.26954	MR_inoculated	MS_control	-3.27086	3.42371	2.39063e-05	0.000548241	Down	Yes	XP_014521701.1		3847.GLYMA14G40561.1		GO:0005575,GO:0005622,GO:0005623,GO:0005634,GO:0005737,GO:0005739,GO:0005829,GO:0005911,GO:0009506,GO:0030054,GO:0043226,GO:0043227,GO:0043229,GO:0043231,GO:0044424,GO:0044444,GO:0044464,GO:0055044	K12818	A	Pre-mRNA-splicing factor ATP-dependent RNA
MSTRG.26131	MR_inoculated	MS_control	-3.03059	5.62711	2.43684e-05	0.000558132	Down	Yes
MSTRG.25823	MR_inoculated	MS_control	-3.00292	6.42375	2.44109e-05	0.0005584	Down	Yes	XP_014520734.1		3847.GLYMA01G36630.1		GO:0003674,GO:0003824,GO:0004672,GO:0004712,GO:0005575,GO:0005622,GO:0005623,GO:0005737,GO:0005829,GO:0006464,GO:0006468,GO:0006793,GO:0006796,GO:0006996,GO:0008150,GO:0008152,GO:0009657,GO:0009658,GO:0009987,GO:0016043,GO:0016301,GO:0016310,GO:0016740,GO:0016772,GO:0016773,GO:0019538,GO:0036211,GO:0043170,GO:0043412,GO:0044237,GO:0044238,GO:0044260,GO:0044267,GO:0044424,GO:0044444,GO:0044464,GO:…		T	Kinase family
MSTRG.12636	MR_inoculated	MS_control	-3.01048	6.09644	2.47374e-05	0.000564655	Down	Yes	XP_022638021.1		3847.GLYMA13G08390.2		GO:0000988,GO:0000990,GO:0000996,GO:0001053,GO:0003674,GO:0003824,GO:0003899,GO:0005575,GO:0005622,GO:0005623,GO:0005737,GO:0005739,GO:0006091,GO:0006139,GO:0006351,GO:0006352,GO:0006355,GO:0006461,GO:0006725,GO:0006807,GO:0006996,GO:0008150,GO:0008152,GO:0009058,GO:0009059,GO:0009314,GO:0009416,GO:0009507,GO:0009536,GO:0009628,GO:0009637,GO:0009639,GO:0009657,GO:0009658,GO:0009889,GO:0009891,GO:…	K03093	K	RNA polymerase sigma factor
MSTRG.20179	MR_inoculated	MS_control	2.99318	6.74165	2.47467e-05	0.000564655	Up	Yes	XP_014510969.1		3694.POPTR_0001s35870.1				S	Mediator complex subunit 28
MSTRG.5166	MR_inoculated	MS_control	3.26154	3.41645	2.48861e-05	0.00056712	Up	Yes	XP_022634978.1		3847.GLYMA19G37470.1				K	NLI interacting factor-like phosphatase
MSTRG.2010	MR_inoculated	MS_control	3.13064	4.20947	2.49299e-05	0.000567406	Up	Yes	XP_014514748.1		4113.PGSC0003DMT400055632				S	Pollen proteins Ole e I like
MSTRG.16786	MR_inoculated	MS_control	3.13758	4.13869	2.51491e-05	0.000571675	Up	Yes	XP_014507386.1		3847.GLYMA17G05540.1		GO:0000003,GO:0003006,GO:0005575,GO:0005622,GO:0005623,GO:0005634,GO:0006950,GO:0006952,GO:0007154,GO:0007165,GO:0007275,GO:0008150,GO:0009555,GO:0009607,GO:0009617,GO:0009719,GO:0009725,GO:0009753,GO:0009755,GO:0009791,GO:0009867,GO:0009908,GO:0009987,GO:0010033,GO:0022414,GO:0023052,GO:0032501,GO:0032502,GO:0032870,GO:0042221,GO:0042742,GO:0043226,GO:0043227,GO:0043229,GO:0043231,GO:0044424,GO:…	K13464	K	jasmonate-zim-domain protein 1
MSTRG.5448	MR_inoculated	MS_control	3.14134	4.10196	2.52667e-05	0.000573629	Up	Yes	XP_014495631.1		3847.GLYMA19G40190.1
MSTRG.15538	MR_inoculated	MS_control	-2.98346	7.08864	2.5315e-05	0.000574008	Down	Yes	XP_014509105.1		3847.GLYMA07G30360.1		GO:0005575,GO:0005622,GO:0005623,GO:0005737,GO:0009507,GO:0009526,GO:0009536,GO:0009941,GO:0016020,GO:0031090,GO:0031967,GO:0031969,GO:0031975,GO:0042170,GO:0043226,GO:0043227,GO:0043229,GO:0043231,GO:0044422,GO:0044424,GO:0044434,GO:0044435,GO:0044444,GO:0044446,GO:0044464		P	efflux antiporter
MSTRG.30770	MR_inoculated	MS_control	3.01566	5.75289	2.53973e-05	0.000575155	Up	Yes	XP_014490373.1		3847.GLYMA12G31770.1	HPL	GO:0005575,GO:0005622,GO:0005623,GO:0005737,GO:0006082,GO:0006629,GO:0006631,GO:0006950,GO:0008150,GO:0008152,GO:0009507,GO:0009526,GO:0009536,GO:0009611,GO:0009941,GO:0009987,GO:0019752,GO:0031967,GO:0031975,GO:0032787,GO:0043226,GO:0043227,GO:0043229,GO:0043231,GO:0043436,GO:0044237,GO:0044238,GO:0044255,GO:0044281,GO:0044422,GO:0044424,GO:0044434,GO:0044435,GO:0044444,GO:0044446,GO:0044464,GO:…	K10528	Q	hydroperoxide lyase
MSTRG.26909	MR_inoculated	MS_control	2.96944	8.22589	2.54771e-05	0.000576242	Up	Yes	XP_014521692.1		3847.GLYMA18G00480.2				A	RNA recognition motif. (a.k.a. RRM, RBD, or RNP domain)
MSTRG.18057	MR_inoculated	MS_control	3.08347	4.61487	2.55723e-05	0.000577673	Up	Yes	XP_014513127.2		29760.VIT_08s0007g02370.t01
MSTRG.26285	MR_inoculated	MS_control	-3.00903	5.92586	2.56862e-05	0.000579523	Down	Yes	XP_014520721.1		3847.GLYMA01G03160.1		GO:0003674,GO:0003824,GO:0005215,GO:0005575,GO:0005622,GO:0005623,GO:0005737,GO:0005886,GO:0006139,GO:0006152,GO:0006163,GO:0006195,GO:0006200,GO:0006725,GO:0006753,GO:0006793,GO:0006796,GO:0006807,GO:0006810,GO:0006857,GO:0008150,GO:0008152,GO:0009056,GO:0009116,GO:0009117,GO:0009119,GO:0009123,GO:0009125,GO:0009126,GO:0009128,GO:0009141,GO:0009143,GO:0009144,GO:0009146,GO:0009150,GO:0009154,GO:…	K05656	Q	ABC transporter B family member 26
MSTRG.20005	MR_inoculated	MS_control	2.99238	6.36222	2.59175e-05	0.000584014	Up	Yes	XP_014510931.1		3847.GLYMA10G30990.1		GO:0005575,GO:0005622,GO:0005623,GO:0005737,GO:0009507,GO:0009532,GO:0009536,GO:0009570,GO:0043226,GO:0043227,GO:0043229,GO:0043231,GO:0044422,GO:0044424,GO:0044434,GO:0044435,GO:0044444,GO:0044446,GO:0044464
MSTRG.31605	MR_inoculated	MS_control	-2.97267	7.41712	2.62106e-05	0.000589884	Down	Yes	XP_014491302.1		3847.GLYMA16G05060.1	KUP3	GO:0005575,GO:0005623,GO:0005886,GO:0016020,GO:0044464,GO:0071944	K03549	P	potassium transporter
MSTRG.31645	MR_inoculated	MS_control	-3.02893	5.35079	2.63425e-05	0.000592117	Down	Yes	XP_014491256.1		3847.GLYMA16G06410.1			K00939	F	adenylate kinase
MSTRG.30640	MR_inoculated	MS_control	-2.95464	10.01	2.649e-05	0.000594268	Down	Yes	XP_014490309.1		3847.GLYMA08G41460.1		GO:0003674,GO:0003824,GO:0004760,GO:0005575,GO:0005576,GO:0005622,GO:0005623,GO:0005737,GO:0005777,GO:0005886,GO:0008150,GO:0008152,GO:0008453,GO:0008483,GO:0009058,GO:0009507,GO:0009532,GO:0009536,GO:0009570,GO:0009853,GO:0009987,GO:0016020,GO:0016740,GO:0016769,GO:0042579,GO:0043094,GO:0043226,GO:0043227,GO:0043229,GO:0043231,GO:0044237,GO:0044249,GO:0044422,GO:0044424,GO:0044434,GO:0044435,GO:…	K00830	E	serine-glyoxylate
MSTRG.19883	MR_inoculated	MS_control	-3.0507	4.96844	2.65038e-05	0.000594268	Down	Yes	XP_014514672.1		3847.GLYMA10G29710.1	OSI_37450			P	heavy metal-associated domain containing protein, expressed
MSTRG.254	MR_inoculated	MS_control	-3.01712	5.50575	2.69234e-05	0.00060293	Down	Yes	XP_014517597.1		3847.GLYMA19G01470.1		GO:0000302,GO:0001561,GO:0002376,GO:0003674,GO:0003824,GO:0006082,GO:0006629,GO:0006631,GO:0006950,GO:0006952,GO:0006955,GO:0006979,GO:0008150,GO:0008152,GO:0008219,GO:0009056,GO:0009062,GO:0009607,GO:0009617,GO:0009627,GO:0009719,GO:0009725,GO:0009737,GO:0009751,GO:0009814,GO:0009987,GO:0010033,GO:0010035,GO:0014070,GO:0016042,GO:0016054,GO:0016165,GO:0016265,GO:0016491,GO:0016701,GO:0016702,GO:…	K10529	S	alpha-dioxygenase
MSTRG.25376	MR_inoculated	MS_control	3.32931	3.07276	2.69976e-05	0.000603847	Up	Yes	XP_014520096.1		3847.GLYMA11G04200.1		GO:0005575,GO:0005623,GO:0005886,GO:0016020,GO:0044464,GO:0071944	K00924	T	receptor-like protein kinase
MSTRG.30276	MR_inoculated	MS_control	-2.95764	8.16114	2.736e-05	0.000611197	Down	Yes	XP_014489982.1		3847.GLYMA06G15070.1		GO:0003674,GO:0005215,GO:0005575,GO:0005622,GO:0005623,GO:0005737,GO:0006810,GO:0008150,GO:0009507,GO:0009526,GO:0009536,GO:0009941,GO:0031967,GO:0031975,GO:0043226,GO:0043227,GO:0043229,GO:0043231,GO:0044422,GO:0044424,GO:0044434,GO:0044435,GO:0044444,GO:0044446,GO:0044464,GO:0051179,GO:0051234		S	ABC1 family
MSTRG.21595	MR_inoculated	MS_control	3.15293	3.89329	2.7503e-05	0.000613421	Up	Yes	XP_014516182.1		3847.GLYMA15G02350.1		GO:0001071,GO:0003674,GO:0003700,GO:0005575,GO:0005622,GO:0005623,GO:0005634,GO:0006355,GO:0006417,GO:0008150,GO:0009719,GO:0009725,GO:0009733,GO:0009889,GO:0010033,GO:0010468,GO:0010556,GO:0010608,GO:0019219,GO:0019222,GO:0031323,GO:0031326,GO:0032268,GO:0042221,GO:0043226,GO:0043227,GO:0043229,GO:0043231,GO:0044424,GO:0044464,GO:0050789,GO:0050794,GO:0050896,GO:0051171,GO:0051246,GO:0051252,GO:…	K14484	K	auxin-responsive protein
MSTRG.9801	MR_inoculated	MS_control	2.97574	6.62136	2.7561e-05	0.000613421	Up	Yes	XP_014500284.1		3847.GLYMA06G00720.1				S	Pollen proteins Ole e I like
MSTRG.4061	MR_inoculated	MS_control	-2.94827	9.48748	2.75611e-05	0.000613421	Down	Yes	XP_014519299.1		3847.GLYMA10G04780.1	PSAE	GO:0005575,GO:0005622,GO:0005623,GO:0005737,GO:0009507,GO:0009526,GO:0009532,GO:0009534,GO:0009535,GO:0009536,GO:0009570,GO:0009579,GO:0009941,GO:0010287,GO:0016020,GO:0031967,GO:0031975,GO:0031976,GO:0031984,GO:0034357,GO:0042651,GO:0043226,GO:0043227,GO:0043229,GO:0043231,GO:0044422,GO:0044424,GO:0044434,GO:0044435,GO:0044436,GO:0044444,GO:0044446,GO:0044464,GO:0055035	K02693	C	photosystem I reaction center subunit IV
MSTRG.12513	MR_inoculated	MS_control	3.06581	4.62642	2.78157e-05	0.000618328	Up	Yes
MSTRG.18281	MR_inoculated	MS_control	-2.95337	8.11321	2.80546e-05	0.000622129	Down	Yes	XP_014513523.1		3847.GLYMA02G31480.1		GO:0000302,GO:0005575,GO:0005622,GO:0005623,GO:0005737,GO:0006139,GO:0006396,GO:0006725,GO:0006807,GO:0006950,GO:0006979,GO:0008150,GO:0008152,GO:0009507,GO:0009532,GO:0009536,GO:0009570,GO:0009987,GO:0010467,GO:0010468,GO:0016070,GO:0019222,GO:0031425,GO:0034641,GO:0042221,GO:0043170,GO:0043226,GO:0043227,GO:0043229,GO:0043231,GO:0044237,GO:0044238,GO:0044260,GO:0044422,GO:0044424,GO:0044434,GO:…	K06207	J	GTP-binding protein TypA
MSTRG.4451	MR_inoculated	MS_control	-3.14488	3.93167	2.80811e-05	0.000622129	Down	Yes	XP_022634589.1		3847.GLYMA04G21450.2			K11593	J	Argonaute
MSTRG.14100	MR_inoculated	MS_control	-3.0506	4.8129	2.80903e-05	0.000622129	Down	Yes	XP_022638783.1		3847.GLYMA02G11711.1	UGT73B5	GO:0003674,GO:0003824,GO:0005575,GO:0005622,GO:0005623,GO:0005737,GO:0005829,GO:0008150,GO:0008152,GO:0008194,GO:0009607,GO:0016740,GO:0016757,GO:0016758,GO:0035251,GO:0044424,GO:0044444,GO:0044464,GO:0046527,GO:0050896,GO:0051704,GO:0051707,GO:0080043,GO:0080044		C, G	flavonol 3-O-glucosyltransferase activity
MSTRG.4845	MR_inoculated	MS_control	3.43172	2.73173	2.81241e-05	0.000622129	Up	Yes	XP_014495445.1		3847.GLYMA03G29760.1	UVI4	GO:0000902,GO:0000904,GO:0005575,GO:0005622,GO:0005623,GO:0005634,GO:0006139,GO:0006259,GO:0006260,GO:0006261,GO:0006725,GO:0006807,GO:0007049,GO:0007275,GO:0008150,GO:0008152,GO:0008544,GO:0009058,GO:0009059,GO:0009314,GO:0009411,GO:0009416,GO:0009628,GO:0009653,GO:0009888,GO:0009913,GO:0009987,GO:0010026,GO:0010090,GO:0010091,GO:0010224,GO:0016043,GO:0022402,GO:0030154,GO:0030855,GO:0032501,GO:…
MSTRG.12698	MR_inoculated	MS_control	-2.94329	8.63321	2.86717e-05	0.000633469	Down	Yes	XP_014504767.1		3847.GLYMA13G02510.1		GO:0003674,GO:0003824,GO:0005575,GO:0005622,GO:0005623,GO:0005737,GO:0005773,GO:0005829,GO:0005886,GO:0006082,GO:0006807,GO:0006809,GO:0008150,GO:0008152,GO:0008940,GO:0009058,GO:0009314,GO:0009416,GO:0009607,GO:0009608,GO:0009610,GO:0009620,GO:0009628,GO:0009703,GO:0009987,GO:0016020,GO:0016491,GO:0016661,GO:0034641,GO:0042126,GO:0042128,GO:0043226,GO:0043227,GO:0043229,GO:0043231,GO:0043436,GO:…	K10534	C	Nitrate reductase is a key enzyme involved in the first step of nitrate assimilation in plants, fungi and bacteria (By similarity)
MSTRG.6573	MR_inoculated	MS_control	2.94514	8.18964	2.91339e-05	0.000642896	Up	Yes	XP_014496498.1		3847.GLYMA16G08040.1				C	alcohol dehydrogenase
MSTRG.21980	MR_inoculated	MS_control	-3.19833	3.5564	2.93675e-05	0.000647264	Down	Yes	XP_022641815.1		3847.GLYMA07G06810.1	SUFE	GO:0003674,GO:0005575,GO:0005622,GO:0005623,GO:0005737,GO:0005739,GO:0008047,GO:0008150,GO:0008152,GO:0009058,GO:0009507,GO:0009532,GO:0009536,GO:0009570,GO:0016043,GO:0016226,GO:0019222,GO:0022607,GO:0030234,GO:0031163,GO:0043085,GO:0043226,GO:0043227,GO:0043229,GO:0043231,GO:0044085,GO:0044093,GO:0044422,GO:0044424,GO:0044434,GO:0044435,GO:0044444,GO:0044446,GO:0044464,GO:0050789,GO:0050790,GO:…	K02426	T	SufE-like protein
MSTRG.7573	MR_inoculated	MS_control	3.02416	5.02773	2.9479e-05	0.000648931	Up	Yes	XP_014497434.1		3847.GLYMA18G53490.1	OSI_18101	GO:0005575,GO:0005622,GO:0005623,GO:0005737,GO:0005739,GO:0043226,GO:0043227,GO:0043229,GO:0043231,GO:0044424,GO:0044444,GO:0044464
MSTRG.19348	MR_inoculated	MS_control	-3.00509	5.36119	2.97515e-05	0.000654135	Down	Yes	XP_014514330.1		3847.GLYMA02G16280.1		GO:0001071,GO:0003674,GO:0003700,GO:0006355,GO:0008150,GO:0009889,GO:0010468,GO:0010556,GO:0019219,GO:0019222,GO:0031323,GO:0031326,GO:0050789,GO:0050794,GO:0051171,GO:0051252,GO:0060255,GO:0065007,GO:0080090,GO:2000112,GO:2001141		K	zinc finger protein
MSTRG.11776	MR_inoculated	MS_control	3.41966	2.72101	2.99756e-05	0.000658264	Up	Yes
MSTRG.13863	MR_inoculated	MS_control	-2.93914	7.85432	3.07026e-05	0.000672427	Down	Yes	XP_022638603.1		3847.GLYMA16G19560.2	PHOT2	GO:0000166,GO:0003674,GO:0003824,GO:0004672,GO:0004674,GO:0004871,GO:0004872,GO:0005488,GO:0005575,GO:0005622,GO:0005623,GO:0005737,GO:0005794,GO:0005886,GO:0006464,GO:0006468,GO:0006793,GO:0006796,GO:0006996,GO:0007154,GO:0007165,GO:0008150,GO:0008152,GO:0009314,GO:0009416,GO:0009605,GO:0009606,GO:0009628,GO:0009637,GO:0009638,GO:0009657,GO:0009658,GO:0009785,GO:0009881,GO:0009882,GO:0009902,GO:…	K08282	T	blue light photoreceptor
MSTRG.11115	MR_inoculated	MS_control	-2.96499	6.26567	3.07298e-05	0.000672427	Down	Yes	XP_014503961.1		3847.GLYMA14G01340.1		GO:0003674,GO:0005488,GO:0005515,GO:0005575,GO:0005622,GO:0005623,GO:0005737,GO:0006457,GO:0008150,GO:0008152,GO:0009507,GO:0009532,GO:0009536,GO:0009570,GO:0009987,GO:0019538,GO:0043170,GO:0043226,GO:0043227,GO:0043229,GO:0043231,GO:0044183,GO:0044237,GO:0044238,GO:0044260,GO:0044267,GO:0044422,GO:0044424,GO:0044434,GO:0044435,GO:0044444,GO:0044446,GO:0044464,GO:0061077,GO:0071704		S	RbcX protein
MSTRG.22403	MR_inoculated	MS_control	2.97402	5.90634	3.07319e-05	0.000672427	Up	Yes	XP_022642169.1		3847.GLYMA16G10780.1				S	Protein of unknown function (DUF760)
MSTRG.16867	MR_inoculated	MS_control	-3.10551	4.06917	3.09905e-05	0.000677268	Down	Yes	XP_014506948.1		3847.GLYMA17G04470.1				T	Pyruvate dehydrogenase kinase
MSTRG.27103	MR_inoculated	MS_control	-2.96795	6.06813	3.11761e-05	0.000680503	Down	Yes	XP_014521930.1		3847.GLYMA12G05780.1	OSI_22753	GO:0003674,GO:0003824,GO:0004338,GO:0004553,GO:0004565,GO:0008150,GO:0008152,GO:0008422,GO:0015925,GO:0015926,GO:0016787,GO:0016798,GO:0033907,GO:0047701,GO:0080083	K01188	G	beta-glucosidase
MSTRG.26004	MR_inoculated	MS_control	-2.92284	10.5014	3.14442e-05	0.00068553	Down	Yes	XP_014521095.1		3847.GLYMA09G34410.1	PRK	GO:0005575,GO:0005576,GO:0005622,GO:0005623,GO:0005737,GO:0006950,GO:0006952,GO:0008150,GO:0009266,GO:0009409,GO:0009507,GO:0009526,GO:0009532,GO:0009534,GO:0009535,GO:0009536,GO:0009570,GO:0009579,GO:0009607,GO:0009617,GO:0009628,GO:0009941,GO:0010319,GO:0016020,GO:0031967,GO:0031975,GO:0031976,GO:0031984,GO:0034357,GO:0042651,GO:0042742,GO:0043226,GO:0043227,GO:0043229,GO:0043231,GO:0044422,GO:…	K00855	T, Z	Phosphoribulokinase
MSTRG.8754	MR_inoculated	MS_control	-3.00344	5.17716	3.16068e-05	0.000688246	Down	Yes	XP_014501777.1		3847.GLYMA06G11150.1	OSI_10373	GO:0005575,GO:0016020	K17469	P	sulfate transporter
MSTRG.9768	MR_inoculated	MS_control	3.035	4.65205	3.21373e-05	0.000698958	Up	Yes	XP_022636799.1		3847.GLYMA15G41980.1		GO:0005575,GO:0005622,GO:0005623,GO:0005737,GO:0005739,GO:0006810,GO:0008150,GO:0009663,GO:0009987,GO:0010496,GO:0010497,GO:0016043,GO:0034330,GO:0043226,GO:0043227,GO:0043229,GO:0043231,GO:0044424,GO:0044444,GO:0044464,GO:0044699,GO:0044763,GO:0044765,GO:0045216,GO:0051179,GO:0051234,GO:0071840		A	DEAD-box ATP-dependent RNA helicase
MSTRG.22122	MR_inoculated	MS_control	-2.95555	6.28947	3.22073e-05	0.000699639	Down	Yes	XP_014516436.1		3847.GLYMA16G34620.1		GO:0003674,GO:0003824,GO:0004672,GO:0005575,GO:0005622,GO:0005623,GO:0005737,GO:0006464,GO:0006468,GO:0006793,GO:0006796,GO:0008150,GO:0008152,GO:0009507,GO:0009534,GO:0009536,GO:0009579,GO:0009987,GO:0010109,GO:0016301,GO:0016310,GO:0016740,GO:0016772,GO:0016773,GO:0019222,GO:0019538,GO:0031323,GO:0031976,GO:0031984,GO:0036211,GO:0042548,GO:0042549,GO:0043170,GO:0043226,GO:0043227,GO:0043229,GO:…		T	serine threonine-protein kinase STN8, chloroplastic-like
MSTRG.28066	MR_inoculated	MS_control	-3.11842	3.9082	3.23894e-05	0.000702753	Down	Yes
MSTRG.13853	MR_inoculated	MS_control	-2.91979	8.76001	3.25296e-05	0.000704381	Down	Yes	XP_014510193.1		29760.VIT_18s0001g10560.t01		GO:0005575,GO:0005622,GO:0005623,GO:0005737,GO:0005829,GO:0005886,GO:0006996,GO:0008150,GO:0009657,GO:0009658,GO:0009902,GO:0009903,GO:0009904,GO:0009987,GO:0016020,GO:0016043,GO:0044424,GO:0044444,GO:0044464,GO:0044699,GO:0044763,GO:0051179,GO:0051234,GO:0051640,GO:0051641,GO:0051644,GO:0051649,GO:0051656,GO:0051667,GO:0071840,GO:0071944		S	Pfam:DUF827
MSTRG.28016	MR_inoculated	MS_control	-2.96307	5.96731	3.25422e-05	0.000704381	Down	Yes	XP_014522757.1		3847.GLYMA12G15940.1		GO:0003674,GO:0003824,GO:0005575,GO:0005622,GO:0005623,GO:0006066,GO:0008150,GO:0008152,GO:0016020,GO:0016491,GO:0016614,GO:0016899,GO:0043226,GO:0043227,GO:0043229,GO:0043231,GO:0044281,GO:0044424,GO:0044464,GO:0044710,GO:0046577,GO:0055114,GO:0071704,GO:1901615	K17756	E	Long-chain-alcohol oxidase
MSTRG.15382	MR_inoculated	MS_control	-3.44408	2.6097	3.25995e-05	0.000704779	Down	Yes	XP_014507374.1		3847.GLYMA05G03650.1		GO:0001071,GO:0003674,GO:0003700,GO:0005575,GO:0005622,GO:0005623,GO:0005634,GO:0006355,GO:0008150,GO:0009888,GO:0009889,GO:0009890,GO:0009892,GO:0010087,GO:0010089,GO:0010468,GO:0010556,GO:0010558,GO:0010605,GO:0010629,GO:0019219,GO:0019222,GO:0031323,GO:0031324,GO:0031326,GO:0031327,GO:0032502,GO:0043226,GO:0043227,GO:0043229,GO:0043231,GO:0044087,GO:0044424,GO:0044464,GO:0045892,GO:0045934,GO:…		K	Homeobox protein knotted-1-like
MSTRG.31684	MR_inoculated	MS_control	3.20827	3.36915	3.31142e-05	0.000715055	Up	Yes	XP_022633444.1		3847.GLYMA16G06080.1				T	Inherit from KOG: pleckstrin homology domain containing, family M
MSTRG.17700	MR_inoculated	MS_control	2.9504	6.18722	3.32572e-05	0.000717287	Up	Yes	XP_022640026.1		3847.GLYMA08G05165.1				K	Transcription factor
MSTRG.25530	MR_inoculated	MS_control	-2.93316	7.04412	3.33447e-05	0.000718319	Down	Yes	XP_014520982.1		3847.GLYMA01G39520.3	AP2	GO:0000003,GO:0001071,GO:0003002,GO:0003006,GO:0003674,GO:0003700,GO:0005575,GO:0005622,GO:0005623,GO:0005634,GO:0006355,GO:0007275,GO:0007389,GO:0008150,GO:0009653,GO:0009791,GO:0009886,GO:0009887,GO:0009888,GO:0009889,GO:0009908,GO:0010073,GO:0010092,GO:0010093,GO:0010154,GO:0010468,GO:0010556,GO:0019219,GO:0019222,GO:0022414,GO:0031323,GO:0031326,GO:0032501,GO:0032502,GO:0035670,GO:0043226,GO:…	K09284	K	floral homeotic protein APETALA
MSTRG.22911	MR_inoculated	MS_control	3.25086	3.17847	3.34658e-05	0.000718932	Up	Yes	XP_022641953.1		3847.GLYMA03G08250.1		GO:0005575,GO:0005622,GO:0005623,GO:0005737,GO:0005829,GO:0044424,GO:0044444,GO:0044464		O	zinc finger
MSTRG.5783	MR_inoculated	MS_control	-3.09112	4.05642	3.34922e-05	0.000718932	Down	Yes	XP_022635144.1		3847.GLYMA06G21190.2				T, Z	FH2
MSTRG.23916	MR_inoculated	MS_control	3.08924	4.05576	3.34922e-05	0.000718932	Up	Yes	XP_014517382.1		3847.GLYMA09G02600.1		GO:0005575,GO:0005576,GO:0005618,GO:0005622,GO:0005623,GO:0005737,GO:0005773,GO:0006950,GO:0006970,GO:0008150,GO:0009505,GO:0009628,GO:0009651,GO:0010035,GO:0010038,GO:0010043,GO:0030312,GO:0042221,GO:0043226,GO:0043227,GO:0043229,GO:0043231,GO:0044424,GO:0044444,GO:0044464,GO:0050896,GO:0071944	K00430	G	Removal of H(2)O(2), oxidation of toxic reductants, biosynthesis and degradation of lignin, suberization, auxin catabolism, response to environmental stresses such as wounding, pathogen attack and oxidative stress. These functions might be dependent on each isozyme isoform in each plant tissue
MSTRG.26309	MR_inoculated	MS_control	3.02971	4.59445	3.38335e-05	0.000725399	Up	Yes	XP_014520310.1		3847.GLYMA02G11770.1		GO:0005575,GO:0005911,GO:0006950,GO:0006970,GO:0006972,GO:0008150,GO:0009414,GO:0009415,GO:0009506,GO:0009628,GO:0009651,GO:0009719,GO:0009725,GO:0009737,GO:0010033,GO:0010035,GO:0016020,GO:0030054,GO:0033993,GO:0042221,GO:0042538,GO:0050896,GO:0055044,GO:0097305,GO:1901700	K17279	U	HVA22-like protein
MSTRG.2918	MR_inoculated	MS_control	-2.92306	7.54621	3.4032e-05	0.000728791	Down	Yes	XP_014520056.1		3847.GLYMA11G10310.1	CAO	GO:0005575,GO:0005622,GO:0005623,GO:0005737,GO:0006605,GO:0006612,GO:0006810,GO:0006886,GO:0008104,GO:0008150,GO:0009314,GO:0009416,GO:0009507,GO:0009526,GO:0009532,GO:0009534,GO:0009535,GO:0009536,GO:0009570,GO:0009579,GO:0009628,GO:0009642,GO:0009644,GO:0009941,GO:0009987,GO:0015031,GO:0016020,GO:0016482,GO:0017038,GO:0030529,GO:0031967,GO:0031975,GO:0031976,GO:0031984,GO:0032991,GO:0033036,GO:…	K12271	S	signal recognition particle 43 kDa protein
MSTRG.2719	MR_inoculated	MS_control	-3.39711	2.6999	3.40933e-05	0.000729243	Down	Yes	XP_022633062.1		3847.GLYMA12G01950.1		GO:0005575,GO:0005622,GO:0005623,GO:0005737,GO:0005783,GO:0009507,GO:0009536,GO:0043226,GO:0043227,GO:0043229,GO:0043231,GO:0044424,GO:0044444,GO:0044464		S	protein transport protein-related
MSTRG.22659	MR_inoculated	MS_control	3.07534	4.12249	3.43958e-05	0.000734845	Up	Yes	XP_022642131.1		3847.GLYMA03G05190.1		GO:0000041,GO:0000325,GO:0003674,GO:0005215,GO:0005381,GO:0005575,GO:0005622,GO:0005623,GO:0005737,GO:0005773,GO:0005774,GO:0005886,GO:0006810,GO:0006811,GO:0006812,GO:0006824,GO:0006826,GO:0006950,GO:0007154,GO:0008150,GO:0008324,GO:0009267,GO:0009605,GO:0009705,GO:0009987,GO:0009991,GO:0010106,GO:0015075,GO:0015087,GO:0015099,GO:0015675,GO:0016020,GO:0022857,GO:0022890,GO:0022891,GO:0022892,GO:…	K14685	P	solute carrier family 40 member
MSTRG.7696	MR_inoculated	MS_control	-2.96635	5.58334	3.45071e-05	0.000736355	Down	Yes
MSTRG.32088	MR_inoculated	MS_control	-3.13985	3.6779	3.47473e-05	0.000740608	Down	Yes	XP_014491878.1		3847.GLYMA20G28000.1				S	P21-Rho-binding domain
MSTRG.14262	MR_inoculated	MS_control	-3.09926	3.93631	3.48172e-05	0.000741227	Down	Yes	XP_014507695.1		3847.GLYMA02G02250.1		GO:0008150,GO:0009314,GO:0009416,GO:0009628,GO:0050896		K	transcription factor bHLH135-like
MSTRG.22205	MR_inoculated	MS_control	3.07072	4.11841	3.52609e-05	0.000749791	Up	Yes	XP_014516153.1		3847.GLYMA07G13790.1				I	Patatin group
MSTRG.29684	MR_inoculated	MS_control	3.12701	3.72098	3.53369e-05	0.000750525	Up	Yes	XP_014524378.1		3847.GLYMA13G39261.1		GO:0005575,GO:0005618,GO:0005622,GO:0005623,GO:0005634,GO:0005737,GO:0005886,GO:0016020,GO:0030312,GO:0031224,GO:0031225,GO:0031226,GO:0043226,GO:0043227,GO:0043229,GO:0043231,GO:0044424,GO:0044425,GO:0044459,GO:0044464,GO:0046658,GO:0071944		G	glucan endo-1-3-beta-glucosidase
MSTRG.19929	MR_inoculated	MS_control	2.93016	6.56175	3.544e-05	0.000751835	Up	Yes	XP_014514165.1		3847.GLYMA20G37280.1			K01738	E	cysteine synthase
MSTRG.2603	MR_inoculated	MS_control	2.9167	7.13363	3.60375e-05	0.000763615	Up	Yes
MSTRG.2670	MR_inoculated	MS_control	3.02447	4.50663	3.61251e-05	0.000764578	Up	Yes	XP_022632880.1		3847.GLYMA12G01420.1			K13457	T	disease resistance
MSTRG.3751	MR_inoculated	MS_control	2.92554	6.58338	3.62332e-05	0.000765971	Up	Yes	XP_014492102.1		3847.GLYMA12G12300.2				I	epoxide hydrolase
MSTRG.17667	MR_inoculated	MS_control	2.97666	5.13667	3.63721e-05	0.000768011	Up	Yes	XP_014507301.1		3847.GLYMA08G02550.1		GO:0001071,GO:0003674,GO:0003676,GO:0003677,GO:0003700,GO:0005488,GO:0005575,GO:0005622,GO:0005623,GO:0005634,GO:0006355,GO:0008150,GO:0009889,GO:0010468,GO:0010556,GO:0019219,GO:0019222,GO:0031323,GO:0031326,GO:0043226,GO:0043227,GO:0043229,GO:0043231,GO:0044424,GO:0044464,GO:0050789,GO:0050794,GO:0051171,GO:0051252,GO:0060255,GO:0065007,GO:0080090,GO:0097159,GO:1901363,GO:2000112,GO:2001141	K09273	K	High Mobility Group
MSTRG.23509	MR_inoculated	MS_control	3.10714	3.80464	3.64341e-05	0.000768424	Up	Yes	XP_014518916.1		3847.GLYMA09G25470.1	O7	GO:0000003,GO:0003006,GO:0003674,GO:0003824,GO:0005575,GO:0005576,GO:0005622,GO:0005623,GO:0005737,GO:0005911,GO:0006082,GO:0006950,GO:0006952,GO:0007275,GO:0008150,GO:0008152,GO:0009056,GO:0009506,GO:0009507,GO:0009532,GO:0009536,GO:0009570,GO:0009607,GO:0009620,GO:0009791,GO:0009987,GO:0010029,GO:0010030,GO:0010035,GO:0010038,GO:0010154,GO:0010214,GO:0016054,GO:0016874,GO:0016877,GO:0016878,GO:…		I	synthetase
MSTRG.16327	MR_inoculated	MS_control	-2.90226	8.53993	3.65335e-05	0.000769624	Down	Yes	XP_014510208.1		3847.GLYMA17G12420.1		GO:0005575,GO:0006950,GO:0008150,GO:0009611,GO:0009719,GO:0009725,GO:0009753,GO:0010033,GO:0016020,GO:0042221,GO:0050896,GO:1901700	K14638	P	Nitrate transporter
MSTRG.20240	MR_inoculated	MS_control	2.94283	5.76991	3.71711e-05	0.000782147	Up	Yes	XP_014511247.1		3847.GLYMA20G34120.1		GO:0005575,GO:0005622,GO:0005623,GO:0005737,GO:0009507,GO:0009536,GO:0043226,GO:0043227,GO:0043229,GO:0043231,GO:0044424,GO:0044444,GO:0044464		S	hydrolase
MSTRG.18573	MR_inoculated	MS_control	3.06314	4.07274	3.75988e-05	0.00079023	Up	Yes	XP_014511249.2		3847.GLYMA18G42540.1	SQD2	GO:0003674,GO:0003824,GO:0005575,GO:0005622,GO:0005623,GO:0005737,GO:0006629,GO:0006643,GO:0006664,GO:0008150,GO:0008152,GO:0008194,GO:0008610,GO:0009058,GO:0009247,GO:0009507,GO:0009526,GO:0009536,GO:0009941,GO:0009987,GO:0016740,GO:0016757,GO:0031967,GO:0031975,GO:0043226,GO:0043227,GO:0043229,GO:0043231,GO:0044237,GO:0044238,GO:0044249,GO:0044255,GO:0044422,GO:0044424,GO:0044434,GO:0044435,GO:…	K06119	I, M, O	GDP-mannose-dependent alpha-mannosyltransferase-like
MSTRG.1287	MR_inoculated	MS_control	2.89778	8.14571	3.77443e-05	0.000792369	Up	Yes	XP_022642216.1		3847.GLYMA13G06040.1		GO:0003674,GO:0003824,GO:0004645,GO:0005575,GO:0005622,GO:0005623,GO:0005737,GO:0006950,GO:0008150,GO:0008152,GO:0009266,GO:0009414,GO:0009415,GO:0009507,GO:0009532,GO:0009536,GO:0009570,GO:0009628,GO:0010035,GO:0016740,GO:0016757,GO:0016758,GO:0042221,GO:0043226,GO:0043227,GO:0043229,GO:0043231,GO:0044422,GO:0044424,GO:0044434,GO:0044435,GO:0044444,GO:0044446,GO:0044464,GO:0050896,GO:1901700	K00688	G	Phosphorylase is an important allosteric enzyme in carbohydrate metabolism. Enzymes from different sources differ in their regulatory mechanisms and in their natural substrates. However, all known phosphorylases share catalytic and structural properties (By similarity)
MSTRG.18235	MR_inoculated	MS_control	3.16899	3.40309	3.82257e-05	0.000801546	Up	Yes	XP_014511377.2		3847.GLYMA02G29450.2		GO:0005575,GO:0005622,GO:0005623,GO:0005737,GO:0005739,GO:0043226,GO:0043227,GO:0043229,GO:0043231,GO:0044424,GO:0044444,GO:0044464		S	Pentatricopeptide repeat-containing protein
MSTRG.29955	MR_inoculated	MS_control	2.96561	5.14472	3.84091e-05	0.000804459	Up	Yes	XP_014489587.1		3847.GLYMA18G38050.2		GO:0006792,GO:0006950,GO:0007154,GO:0008150,GO:0009267,GO:0009605,GO:0009987,GO:0009991,GO:0010438,GO:0031667,GO:0031668,GO:0031669,GO:0033554,GO:0042594,GO:0044699,GO:0044763,GO:0050789,GO:0050896,GO:0051716,GO:0065007,GO:0071496		S	male sterility MS5 family protein
MSTRG.2704	MR_inoculated	MS_control	3.22409	3.15475	3.85756e-05	0.000807013	Up	Yes	XP_014523171.1		3847.GLYMA11G11826.1		GO:0005575,GO:0005622,GO:0005623,GO:0005634,GO:0043226,GO:0043227,GO:0043229,GO:0043231,GO:0044424,GO:0044464		K	growth-regulating factor
MSTRG.831	MR_inoculated	MS_control	3.13538	3.56179	3.86602e-05	0.000807851	Up	Yes	XP_014522660.2		3847.GLYMA07G10680.2				T	receptor-like protein kinase
MSTRG.28866	MR_inoculated	MS_control	3.02789	4.32731	3.87404e-05	0.000808595	Up	Yes	XP_014523674.1		3847.GLYMA13G10771.1
MSTRG.20420	MR_inoculated	MS_control	-3.20581	3.21776	3.93796e-05	0.00082099	Down	Yes	XP_022641154.1		3847.GLYMA20G32260.1		GO:0005575,GO:0005622,GO:0005623,GO:0005737,GO:0005773,GO:0005774,GO:0016020,GO:0031090,GO:0043226,GO:0043227,GO:0043229,GO:0043231,GO:0044422,GO:0044424,GO:0044437,GO:0044444,GO:0044446,GO:0044464	K15015	E	amino acid transporter
MSTRG.25945	MR_inoculated	MS_control	-2.99501	4.66678	3.94519e-05	0.000821553	Down	Yes	XP_014521258.1		3847.GLYMA01G35620.1		GO:0003674,GO:0003824,GO:0005575,GO:0008150,GO:0008152,GO:0016020,GO:0016491,GO:0016614,GO:0016899,GO:0044710,GO:0046577,GO:0055114	K17756	E	Long-chain-alcohol oxidase
MSTRG.12277	MR_inoculated	MS_control	-2.97862	4.81794	4.04249e-05	0.000839741	Down	Yes	XP_014503591.1		3847.GLYMA13G01770.1				S	hydrolase, alpha beta fold family protein
MSTRG.7843	MR_inoculated	MS_control	-3.21692	3.14737	4.04644e-05	0.000839741	Down	Yes	XP_014499761.1		3847.GLYMA15G16790.1		GO:0005575,GO:0005576,GO:0005622,GO:0005623,GO:0005737,GO:0005777,GO:0005783,GO:0005789,GO:0012505,GO:0016020,GO:0031090,GO:0042175,GO:0042579,GO:0043226,GO:0043227,GO:0043229,GO:0043231,GO:0044422,GO:0044424,GO:0044425,GO:0044432,GO:0044444,GO:0044446,GO:0044464	K09645,K16298	O	serine carboxypeptidase-like
MSTRG.9287	MR_inoculated	MS_control	3.21505	3.14676	4.04644e-05	0.000839741	Up	Yes	XP_014498495.1		3847.GLYMA04G05520.1	IQD6			S	IQ
MSTRG.28716	MR_inoculated	MS_control	-2.92083	5.98872	4.0529e-05	0.000840118	Down	Yes	XP_014523515.1		3847.GLYMA05G29140.1	CIPK12		K07198	T	Cbl-interacting protein kinase
MSTRG.7846	MR_inoculated	MS_control	3.29744	2.84474	4.11731e-05	0.000852495	Up	Yes	XP_014498977.1		3847.GLYMA15G16840.1		GO:0005575,GO:0005622,GO:0005623,GO:0005737,GO:0006139,GO:0006396,GO:0006725,GO:0006807,GO:0008150,GO:0008152,GO:0009507,GO:0009536,GO:0009987,GO:0010467,GO:0016070,GO:0031425,GO:0034641,GO:0043170,GO:0043226,GO:0043227,GO:0043229,GO:0043231,GO:0044237,GO:0044238,GO:0044260,GO:0044424,GO:0044444,GO:0044464,GO:0046483,GO:0071704,GO:0090304,GO:1901360		S	Pentatricopeptide repeat-containing protein
MSTRG.7336	MR_inoculated	MS_control	-2.89139	7.11038	4.15128e-05	0.000858546	Down	Yes	XP_014496941.1		3847.GLYMA08G28030.1				T	phosphatidylinositol 4-kinase type 2-beta
MSTRG.29373	MR_inoculated	MS_control	-2.93854	5.33328	4.23416e-05	0.000874691	Down	Yes
MSTRG.13120	MR_inoculated	MS_control	3.161	3.32733	4.2576e-05	0.000878531	Up	Yes	XP_014503702.1		3847.GLYMA17G34570.1		GO:0005575,GO:0005576,GO:0005618,GO:0005623,GO:0030312,GO:0044464,GO:0048046,GO:0071944	K01193	G	beta-fructofuranosidase
MSTRG.4239	MR_inoculated	MS_control	-2.90023	6.36981	4.27599e-05	0.000881322	Down	Yes	XP_022634530.1		3847.GLYMA18G00980.1				S	drought-induced protein 1
MSTRG.6957	MR_inoculated	MS_control	3.24133	2.99476	4.30365e-05	0.000886015	Up	Yes	XP_014497292.1		3847.GLYMA06G19880.1		GO:0005575,GO:0016020		T, Z	Formin-like protein
MSTRG.10666	MR_inoculated	MS_control	2.89634	6.4313	4.31031e-05	0.000886377	Up	Yes	XP_014498796.1		3847.GLYMA06G46680.1				V	alpha/beta hydrolase fold
MSTRG.26150	MR_inoculated	MS_control	-2.94064	5.19083	4.35197e-05	0.00089393	Down	Yes	XP_014521340.1		3847.GLYMA01G02340.1	OSI_14500			O	zinc finger family protein
MSTRG.22534	MR_inoculated	MS_control	-2.8699	8.31801	4.37969e-05	0.000898606	Down	Yes	XP_014516432.1		3847.GLYMA03G09100.1			K13946	E	auxin transporter-like protein
MSTRG.12054	MR_inoculated	MS_control	-2.93991	5.17322	4.39017e-05	0.000899646	Down	Yes	XP_014503680.1		3847.GLYMA14G37190.1		GO:0005575,GO:0005622,GO:0005623,GO:0005737,GO:0009507,GO:0009536,GO:0043226,GO:0043227,GO:0043229,GO:0043231,GO:0044424,GO:0044444,GO:0044464	K11778	I	Dehydrodolichyl diphosphate synthase
MSTRG.16583	MR_inoculated	MS_control	-2.89174	6.47414	4.39469e-05	0.000899646	Down	Yes	XP_022639605.1		3847.GLYMA13G01190.4		GO:0003674,GO:0003824,GO:0004672,GO:0004712,GO:0006464,GO:0006468,GO:0006793,GO:0006796,GO:0008150,GO:0008152,GO:0009987,GO:0016301,GO:0016310,GO:0016740,GO:0016772,GO:0016773,GO:0019538,GO:0036211,GO:0043170,GO:0043412,GO:0044237,GO:0044238,GO:0044260,GO:0044267,GO:0071704		T	Protein kinase domain containing protein, expressed
MSTRG.28024	MR_inoculated	MS_control	-3.15484	3.32086	4.44241e-05	0.000908388	Down	Yes	XP_022632210.1		3847.GLYMA03G02451.1			K18953	U	Beige/BEACH domain
MSTRG.16273	MR_inoculated	MS_control	2.86011	9.09274	4.47711e-05	0.000914152	Up	Yes	XP_014505805.1		3847.GLYMA05G29630.1		GO:0005575,GO:0005576,GO:0005618,GO:0005622,GO:0005623,GO:0005634,GO:0005737,GO:0009507,GO:0009534,GO:0009536,GO:0009579,GO:0030312,GO:0031976,GO:0031984,GO:0043226,GO:0043227,GO:0043229,GO:0043231,GO:0044422,GO:0044424,GO:0044434,GO:0044435,GO:0044444,GO:0044446,GO:0044464,GO:0048046,GO:0071944		I	GDSL esterase lipase
MSTRG.730	MR_inoculated	MS_control	3.01795	4.14674	4.48069e-05	0.000914152	Up	Yes	XP_014510711.1		3847.GLYMA09G32440.1		GO:0005575,GO:0005622,GO:0005623,GO:0005856,GO:0043226,GO:0043228,GO:0043229,GO:0043232,GO:0044424,GO:0044464
MSTRG.28171	MR_inoculated	MS_control	2.91712	5.48776	4.51194e-05	0.000919492	Up	Yes	XP_014522901.1		3847.GLYMA08G42010.1	OSI_06163	GO:0005575,GO:0005576		S	GDSL esterase lipase
MSTRG.25430	MR_inoculated	MS_control	3.06635	3.76864	4.52956e-05	0.000921301	Up	Yes	XP_014521241.1		3694.POPTR_0002s11250.1	TUA1	GO:0000226,GO:0003674,GO:0005198,GO:0005200,GO:0005575,GO:0005618,GO:0005622,GO:0005623,GO:0005634,GO:0005730,GO:0005737,GO:0005773,GO:0005829,GO:0005856,GO:0005874,GO:0005886,GO:0005911,GO:0006950,GO:0006970,GO:0006996,GO:0007010,GO:0007017,GO:0008150,GO:0009506,GO:0009628,GO:0009629,GO:0009651,GO:0009987,GO:0015630,GO:0016020,GO:0016043,GO:0030054,GO:0030312,GO:0031974,GO:0031981,GO:0032991,GO:…	K07374	Z	Tubulin is the major constituent of microtubules. It binds two moles of GTP, one at an exchangeable site on the beta chain and one at a non-exchangeable site on the alpha chain (By similarity)
MSTRG.15940	MR_inoculated	MS_control	-2.85777	9.14353	4.53099e-05	0.000921301	Down	Yes	XP_022639339.1		3847.GLYMA17G10990.5		GO:0003674,GO:0003824,GO:0004750,GO:0005575,GO:0005576,GO:0005622,GO:0005623,GO:0005737,GO:0006950,GO:0008150,GO:0008152,GO:0009266,GO:0009409,GO:0009507,GO:0009526,GO:0009532,GO:0009534,GO:0009535,GO:0009536,GO:0009570,GO:0009579,GO:0009607,GO:0009624,GO:0009628,GO:0009941,GO:0010319,GO:0016020,GO:0016853,GO:0016854,GO:0016857,GO:0031967,GO:0031975,GO:0031976,GO:0031984,GO:0034357,GO:0042651,GO:…	K01783	G	ribulose-phosphate 3-epimerase
MSTRG.4183	MR_inoculated	MS_control	3.08693	3.63218	4.56166e-05	0.000926498	Up	Yes	XP_014493310.1		3847.GLYMA15G27701.1	OSI_00674		K11380	S	PHD-finger
MSTRG.1417	MR_inoculated	MS_control	2.98447	4.4131	4.60149e-05	0.000933541	Up	Yes	XP_014503026.1		3847.GLYMA05G23950.1		GO:0005575,GO:0005576	K01728	G	Pectate lyase
MSTRG.15327	MR_inoculated	MS_control	-2.93669	5.04572	4.63464e-05	0.000938452	Down	Yes	XP_014507074.1		3847.GLYMA17G14710.1		GO:0005575,GO:0005622,GO:0005623,GO:0005634,GO:0043226,GO:0043227,GO:0043229,GO:0043231,GO:0044424,GO:0044464		K	axial regulator YABBY
MSTRG.14176	MR_inoculated	MS_control	-3.14677	3.31373	4.63606e-05	0.000938452	Down	Yes	XP_022640151.1		3847.GLYMA07G34520.2				S	Human Cytomegalovirus UL139 protein
MSTRG.16598	MR_inoculated	MS_control	2.89518	5.86797	4.68627e-05	0.000946575	Up	Yes	XP_014509767.1		3847.GLYMA13G01150.1		GO:0003674,GO:0003824,GO:0005575,GO:0005576,GO:0005618,GO:0005622,GO:0005623,GO:0005737,GO:0005794,GO:0006950,GO:0008150,GO:0008152,GO:0009266,GO:0009408,GO:0009409,GO:0009605,GO:0009612,GO:0009628,GO:0009664,GO:0009719,GO:0009725,GO:0009733,GO:0009741,GO:0009832,GO:0009987,GO:0010033,GO:0014070,GO:0016043,GO:0016740,GO:0016757,GO:0016758,GO:0016762,GO:0030312,GO:0033993,GO:0042221,GO:0042546,GO:…	K08235,K14504	G	Xyloglucan endotransglucosylase hydrolase protein
MSTRG.15625	MR_inoculated	MS_control	-3.13241	3.36977	4.68664e-05	0.000946575	Down	Yes	XP_014510492.1		3847.GLYMA17G09850.1				S	U-box domain-containing protein
MSTRG.5714	MR_inoculated	MS_control	-2.94653	4.85522	4.69251e-05	0.000946706	Down	Yes	XP_014495814.1		3847.GLYMA11G34241.1		GO:0005575,GO:0005622,GO:0005623,GO:0005737,GO:0005739,GO:0009507,GO:0009536,GO:0043226,GO:0043227,GO:0043229,GO:0043231,GO:0044424,GO:0044444,GO:0044464	K01952	F	phosphoribosylformylglycinamidine synthase
MSTRG.16349	MR_inoculated	MS_control	-2.89043	6.04573	4.71248e-05	0.000949676	Down	Yes
MSTRG.9166	MR_inoculated	MS_control	-2.9056	5.56845	4.75193e-05	0.000956564	Down	Yes	XP_014501655.1		3847.GLYMA06G11260.1				O	DnaJ domain
MSTRG.31531	MR_inoculated	MS_control	-3.10709	3.4757	4.77645e-05	0.000959368	Down	Yes	XP_014491108.1		29760.VIT_11s0037g00580.t01				S	hydroxycinnamoyl-Coenzyme A shikimate quinate hydroxycinnamoyltransferase-like
MSTRG.2913	MR_inoculated	MS_control	3.10521	3.47508	4.77645e-05	0.000959368	Up	Yes	XP_014493376.1		3847.GLYMA11G10300.1				S	Late embryogenesis abundant protein
MSTRG.17329	MR_inoculated	MS_control	3.00908	4.10197	4.79764e-05	0.000962557	Up	Yes	XP_014507877.1		3847.GLYMA05G34910.1			K10418	Z	Dynein light chain type 1 family protein
MSTRG.5156	MR_inoculated	MS_control	3.00935	4.06428	4.89733e-05	0.00098147	Up	Yes	XP_014495571.1		3847.GLYMA19G37340.1		GO:0000139,GO:0005575,GO:0005622,GO:0005623,GO:0005737,GO:0005794,GO:0012505,GO:0016020,GO:0031090,GO:0043226,GO:0043227,GO:0043229,GO:0043231,GO:0044422,GO:0044424,GO:0044431,GO:0044444,GO:0044446,GO:0044464		G, M, W	glycosyltransferase At5g03795-like
MSTRG.8390	MR_inoculated	MS_control	3.10983	3.41645	4.9253e-05	0.000985985	Up	Yes	XP_014498631.1		3847.GLYMA04G40100.1		GO:0005575,GO:0005622,GO:0005623,GO:0005634,GO:0043226,GO:0043227,GO:0043229,GO:0043231,GO:0044424,GO:0044464	K14492	K	response regulator
MSTRG.9856	MR_inoculated	MS_control	3.14362	3.23987	5.00915e-05	0.00100166	Up	Yes	XP_014499907.1		3847.GLYMA06G00275.1		GO:0005575,GO:0005622,GO:0005623,GO:0005634,GO:0043226,GO:0043227,GO:0043229,GO:0043231,GO:0044424,GO:0044464	K05868	D	Cyclin, C-terminal domain
MSTRG.10143	MR_inoculated	MS_control	-2.8448	8.11295	5.04624e-05	0.00100797	Down	Yes	NP_001304234.1		3847.GLYMA18G10270.1		GO:0003674,GO:0003824,GO:0004022,GO:0005575,GO:0005622,GO:0005623,GO:0005737,GO:0005794,GO:0005829,GO:0005886,GO:0005911,GO:0008150,GO:0008152,GO:0009506,GO:0016020,GO:0016491,GO:0016614,GO:0016616,GO:0030054,GO:0043226,GO:0043227,GO:0043229,GO:0043231,GO:0044424,GO:0044444,GO:0044464,GO:0044710,GO:0055044,GO:0055114,GO:0071944		V	bifunctional dihydroflavonol 4-reductase flavanone
MSTRG.3187	MR_inoculated	MS_control	-2.84906	7.24428	5.15593e-05	0.00102871	Down	Yes	XP_014494073.1		3847.GLYMA11G14210.1		GO:0003674,GO:0005215,GO:0005310,GO:0005342,GO:0005575,GO:0005622,GO:0005623,GO:0005737,GO:0005739,GO:0006082,GO:0006520,GO:0006536,GO:0006541,GO:0006807,GO:0006810,GO:0006811,GO:0006820,GO:0006835,GO:0008150,GO:0008152,GO:0008509,GO:0008514,GO:0009064,GO:0009507,GO:0009526,GO:0009528,GO:0009534,GO:0009536,GO:0009579,GO:0009607,GO:0009624,GO:0009706,GO:0009941,GO:0009987,GO:0015075,GO:0015131,GO:…		P	2-oxoglutarate malate translocator
MSTRG.17337	MR_inoculated	MS_control	-2.86638	6.2958	5.16142e-05	0.00102871	Down	Yes	XP_014505629.1		3847.GLYMA05G34990.1		GO:0005575,GO:0005576,GO:0005911,GO:0009506,GO:0030054,GO:0055044		U	cysteine-rich repeat secretory protein
MSTRG.7881	MR_inoculated	MS_control	-2.87855	5.83173	5.19585e-05	0.00103427	Down	Yes	XP_022636142.1		3847.GLYMA15G17000.1	RAN1	GO:0000041,GO:0000160,GO:0003674,GO:0005215,GO:0005375,GO:0005575,GO:0005622,GO:0005623,GO:0005737,GO:0005768,GO:0005794,GO:0005802,GO:0006810,GO:0006811,GO:0006812,GO:0006825,GO:0007154,GO:0007165,GO:0008150,GO:0008324,GO:0009719,GO:0009723,GO:0009725,GO:0009755,GO:0009873,GO:0009987,GO:0010033,GO:0010119,GO:0015075,GO:0016020,GO:0022857,GO:0022890,GO:0022891,GO:0022892,GO:0023052,GO:0030001,GO:…	K17686	P	Copper-transporting ATPase
MSTRG.28567	MR_inoculated	MS_control	2.84135	7.70946	5.20389e-05	0.00103427	Up	Yes	XP_014523301.1		3847.GLYMA08G42260.1		GO:0005575,GO:0005576
MSTRG.17748	MR_inoculated	MS_control	-2.91586	5.0087	5.21215e-05	0.00103427	Down	Yes	XP_022640049.1		3847.GLYMA08G01450.1		GO:0000003,GO:0001071,GO:0003006,GO:0003674,GO:0003700,GO:0005575,GO:0005622,GO:0005623,GO:0005634,GO:0006355,GO:0007275,GO:0008150,GO:0009791,GO:0009889,GO:0009908,GO:0010468,GO:0010556,GO:0019219,GO:0019222,GO:0022414,GO:0031323,GO:0031326,GO:0032501,GO:0032502,GO:0043226,GO:0043227,GO:0043229,GO:0043231,GO:0044424,GO:0044464,GO:0044699,GO:0044707,GO:0044767,GO:0048367,GO:0048437,GO:0048438,GO:…		K	Squamosa promoter-binding-like protein
MSTRG.22337	MR_inoculated	MS_control	2.95858	4.41975	5.21217e-05	0.00103427	Up	Yes	XP_014516020.1		3847.GLYMA16G08900.1				D	May be involved in modulation of pathogen defense and leaf cell death (By similarity)
MSTRG.12816	MR_inoculated	MS_control	-3.25392	2.80525	5.21961e-05	0.00103461	Down	Yes	XP_014504000.1		3847.GLYMA13G08190.1		GO:0003674,GO:0005215,GO:0005575,GO:0005623,GO:0005886,GO:0005887,GO:0006810,GO:0008150,GO:0008643,GO:0009987,GO:0015144,GO:0016020,GO:0016021,GO:0022857,GO:0022891,GO:0022892,GO:0031224,GO:0031226,GO:0034219,GO:0044425,GO:0044459,GO:0044464,GO:0044699,GO:0044763,GO:0044765,GO:0051119,GO:0051179,GO:0051234,GO:0055085,GO:0071702,GO:0071944,GO:1901476	K15382	P	bidirectional sugar transporter
MSTRG.24035	MR_inoculated	MS_control	-2.8618	6.38603	5.22816e-05	0.00103518	Down	Yes	XP_022642311.1		3847.GLYMA15G12320.1		GO:0005575,GO:0005622,GO:0005623,GO:0005634,GO:0005737,GO:0043226,GO:0043227,GO:0043229,GO:0043231,GO:0044424,GO:0044464		K	Scarecrow-like protein
MSTRG.15343	MR_inoculated	MS_control	2.91894	4.87405	5.30795e-05	0.00104983	Up	Yes	XP_014507207.1		29760.VIT_06s0004g04250.t01		GO:0005575,GO:0005622,GO:0005623,GO:0005634,GO:0005694,GO:0005730,GO:0005737,GO:0009507,GO:0009532,GO:0009534,GO:0009536,GO:0009570,GO:0009579,GO:0031974,GO:0031976,GO:0031981,GO:0031984,GO:0043226,GO:0043227,GO:0043228,GO:0043229,GO:0043231,GO:0043232,GO:0043233,GO:0044422,GO:0044424,GO:0044428,GO:0044434,GO:0044435,GO:0044444,GO:0044446,GO:0044464,GO:0070013	K11252	B	Core component of nucleosome. Nucleosomes wrap and compact DNA into chromatin, limiting DNA accessibility to the cellular machineries which require DNA as a template. Histones thereby play a central role in transcription regulation, DNA repair, DNA replication and chromosomal stability. DNA accessibility is regulated via a complex set of post-translational modifications of histones, also called h…
MSTRG.32759	MR_inoculated	MS_control	3.17889	3.02995	5.37692e-05	0.00106229	Up	Yes	XP_014492483.1		3847.GLYMA01G32390.4			K12382	G, I	Saposin-like type B, region 1 family protein
MSTRG.2909	MR_inoculated	MS_control	2.87186	5.77381	5.38268e-05	0.00106229	Up	Yes	XP_014494454.1		3847.GLYMA12G02550.1	EXLA1	GO:0005575,GO:0005576,GO:0005618,GO:0005622,GO:0005623,GO:0005737,GO:0005794,GO:0005911,GO:0009505,GO:0009506,GO:0016020,GO:0030054,GO:0030312,GO:0043226,GO:0043227,GO:0043229,GO:0043231,GO:0044424,GO:0044444,GO:0044464,GO:0055044,GO:0071944		G	expansin-like
MSTRG.20971	MR_inoculated	MS_control	2.91177	4.92867	5.40501e-05	0.00106553	Up	Yes	XP_014514931.1		3847.GLYMA20G26290.1		GO:0000003,GO:0000082,GO:0000278,GO:0003006,GO:0005575,GO:0005622,GO:0005623,GO:0005634,GO:0007049,GO:0007275,GO:0008150,GO:0009719,GO:0009725,GO:0009735,GO:0009741,GO:0009743,GO:0009744,GO:0009791,GO:0009987,GO:0010033,GO:0010154,GO:0014070,GO:0022402,GO:0022403,GO:0022414,GO:0032501,GO:0032502,GO:0033993,GO:0034285,GO:0042127,GO:0042221,GO:0043226,GO:0043227,GO:0043229,GO:0043231,GO:0044424,GO:…	K14505,K18810	D	cyclin d3
MSTRG.7895	MR_inoculated	MS_control	-3.14408	3.16331	5.45095e-05	0.00107342	Down	Yes	XP_014500696.1		3847.GLYMA15G20240.2		GO:0003674,GO:0003824,GO:0005575,GO:0005576,GO:0008150,GO:0008152,GO:0016298,GO:0016787,GO:0016788		I	GDSL esterase lipase
MSTRG.12149	MR_inoculated	MS_control	2.95905	4.29874	5.50823e-05	0.00108352	Up	Yes	XP_014502705.2		3847.GLYMA02G38340.2				S	UPF0176 protein
MSTRG.5293	MR_inoculated	MS_control	2.86821	5.71557	5.54575e-05	0.00108945	Up	Yes	XP_014494856.1		3847.GLYMA10G40890.1		GO:0002252,GO:0002376,GO:0002679,GO:0003674,GO:0003824,GO:0004842,GO:0005575,GO:0005622,GO:0005623,GO:0005737,GO:0005829,GO:0006464,GO:0006950,GO:0006952,GO:0008150,GO:0008152,GO:0009414,GO:0009415,GO:0009628,GO:0009719,GO:0009987,GO:0010033,GO:0010035,GO:0010200,GO:0010243,GO:0016567,GO:0016874,GO:0016879,GO:0016881,GO:0019538,GO:0019787,GO:0032446,GO:0036211,GO:0042221,GO:0043170,GO:0043412,GO:…		O	E3 ubiquitin-protein ligase
MSTRG.14209	MR_inoculated	MS_control	2.99456	3.9723	5.5537e-05	0.00108945	Up	Yes	XP_014505818.1		3847.GLYMA07G34940.1
MSTRG.15777	MR_inoculated	MS_control	-2.94134	4.48843	5.5564e-05	0.00108945	Down	Yes	XP_014510007.1		3847.GLYMA07G31140.1	OSI_26501			T	strubbelig-receptor family
MSTRG.11826	MR_inoculated	MS_control	-2.83088	7.58999	5.56802e-05	0.00109055	Down	Yes	XP_014504444.1		3847.GLYMA02G41250.2		GO:0000003,GO:0003006,GO:0005575,GO:0005622,GO:0005623,GO:0005737,GO:0006950,GO:0006979,GO:0007275,GO:0007568,GO:0008150,GO:0008152,GO:0009507,GO:0009536,GO:0009791,GO:0009987,GO:0010150,GO:0010228,GO:0010260,GO:0022414,GO:0032501,GO:0032502,GO:0033554,GO:0034599,GO:0042221,GO:0043226,GO:0043227,GO:0043229,GO:0043231,GO:0044237,GO:0044424,GO:0044444,GO:0044464,GO:0044699,GO:0044707,GO:0044763,GO:…
MSTRG.15612	MR_inoculated	MS_control	3.21368	2.87409	5.58989e-05	0.00109365	Up	Yes	XP_014510146.1		3847.GLYMA17G13660.1
MSTRG.31905	MR_inoculated	MS_control	2.83618	6.95979	5.61744e-05	0.00109771	Up	Yes	XP_014491710.1		3847.GLYMA12G33070.1		GO:0005575,GO:0005618,GO:0005623,GO:0005911,GO:0006949,GO:0008150,GO:0009506,GO:0009653,GO:0009987,GO:0016020,GO:0030054,GO:0030312,GO:0032502,GO:0044464,GO:0044699,GO:0044763,GO:0044767,GO:0048646,GO:0048856,GO:0055044,GO:0071944		G	May cause loosening and extension of plant cell walls by disrupting non-covalent bonding between cellulose microfibrils and matrix glucans. No enzymatic activity has been found
MSTRG.7582	MR_inoculated	MS_control	-2.8381	6.85952	5.62276e-05	0.00109771	Down	Yes	XP_014498166.1		3847.GLYMA18G53710.1		GO:0005575,GO:0016020	K14638	E	peptide nitrate transporter
MSTRG.22204	MR_inoculated	MS_control	3.03922	3.64358	5.63482e-05	0.00109888	Up	Yes	XP_014515449.1		3847.GLYMA07G13790.1				I	Patatin group
MSTRG.30638	MR_inoculated	MS_control	3.00536	3.85457	5.68557e-05	0.00110739	Up	Yes	XP_014490286.1		3847.GLYMA18G14670.1		GO:0000373,GO:0000375,GO:0000377,GO:0003674,GO:0003676,GO:0003677,GO:0003723,GO:0005488,GO:0005575,GO:0005618,GO:0005622,GO:0005623,GO:0005634,GO:0005730,GO:0005737,GO:0005739,GO:0006139,GO:0006396,GO:0006725,GO:0006807,GO:0006950,GO:0006970,GO:0008150,GO:0008152,GO:0008380,GO:0009266,GO:0009409,GO:0009414,GO:0009415,GO:0009628,GO:0009651,GO:0009987,GO:0010035,GO:0010467,GO:0016070,GO:0030312,GO:…	K16911	A	DEAD-box ATP-dependent RNA helicase
MSTRG.32686	MR_inoculated	MS_control	3.15014	3.08954	5.69066e-05	0.00110739	Up	Yes	XP_022633800.1		3847.GLYMA10G27881.1	IAA30	GO:0000003,GO:0001071,GO:0003006,GO:0003674,GO:0003700,GO:0005575,GO:0005622,GO:0005623,GO:0005634,GO:0006355,GO:0007275,GO:0008150,GO:0009605,GO:0009606,GO:0009628,GO:0009629,GO:0009630,GO:0009719,GO:0009725,GO:0009733,GO:0009790,GO:0009791,GO:0009793,GO:0009889,GO:0010033,GO:0010154,GO:0010262,GO:0010468,GO:0010556,GO:0019219,GO:0019222,GO:0022414,GO:0022622,GO:0031323,GO:0031326,GO:0032501,GO:…	K14484	K	Indole-3-acetic acid inducible 30
MSTRG.3460	MR_inoculated	MS_control	-2.87979	5.35599	5.69833e-05	0.00110769	Down	Yes	XP_014494400.1		3847.GLYMA12G08740.1		GO:0000003,GO:0002376,GO:0003006,GO:0003674,GO:0003824,GO:0005488,GO:0005575,GO:0005622,GO:0005623,GO:0005737,GO:0006725,GO:0006778,GO:0006787,GO:0006807,GO:0006950,GO:0006952,GO:0006955,GO:0007275,GO:0008150,GO:0008152,GO:0008219,GO:0009056,GO:0009507,GO:0009526,GO:0009528,GO:0009534,GO:0009536,GO:0009579,GO:0009607,GO:0009617,GO:0009706,GO:0009791,GO:0009814,GO:0009816,GO:0009908,GO:0009941,GO:…	K13071	P	pheophorbide a oxygenase
MSTRG.11473	MR_inoculated	MS_control	2.90508	4.86189	5.71536e-05	0.00110981	Up	Yes	XP_022637370.1		3847.GLYMA14G04500.1			K17865,K18532	I	MaoC like domain
MSTRG.21114	MR_inoculated	MS_control	-2.89816	4.99317	5.72904e-05	0.00111127	Down	Yes	XP_014514747.1		3847.GLYMA20G24740.1		GO:0005575,GO:0005622,GO:0005623,GO:0005737,GO:0009507,GO:0009536,GO:0043226,GO:0043227,GO:0043229,GO:0043231,GO:0044424,GO:0044444,GO:0044464		O	Molybdopterin guanine dinucleotide synthesis protein B
MSTRG.9943	MR_inoculated	MS_control	2.82975	7.06584	5.76303e-05	0.00111667	Up	Yes	XP_014500198.1		3847.GLYMA15G01160.1				S	Embryo-specific protein 3, (ATS3)
MSTRG.22628	MR_inoculated	MS_control	-2.93184	4.50729	5.77644e-05	0.00111808	Down	Yes	XP_014515129.1		3847.GLYMA16G10880.1				H	1-deoxy-D-xylulose 5-phosphate reductoisomerase
MSTRG.26977	MR_inoculated	MS_control	-3.00744	3.81035	5.85227e-05	0.00113154	Down	Yes	XP_014521778.1		4113.PGSC0003DMT400042400	WRKY31	GO:0000975,GO:0001067,GO:0001071,GO:0003674,GO:0003676,GO:0003677,GO:0003700,GO:0005488,GO:0005575,GO:0005622,GO:0005623,GO:0005634,GO:0006355,GO:0006950,GO:0007154,GO:0008150,GO:0009267,GO:0009605,GO:0009719,GO:0009889,GO:0009890,GO:0009892,GO:0009987,GO:0009991,GO:0010033,GO:0010036,GO:0010200,GO:0010243,GO:0010468,GO:0010556,GO:0010558,GO:0010605,GO:0010629,GO:0016036,GO:0019219,GO:0019222,GO:…		K	Transcription factor
MSTRG.4106	MR_inoculated	MS_control	-2.97706	4.03491	5.87087e-05	0.00113393	Down	Yes	XP_022634477.1		3847.GLYMA10G06121.1				U	Potassium voltage-gated channel, subfamily H (Eag-related), member
MSTRG.5230	MR_inoculated	MS_control	2.91646	4.62355	5.88797e-05	0.00113602	Up	Yes	XP_014495208.1		3847.GLYMA03G35410.1		GO:0005575,GO:0005911,GO:0009506,GO:0030054,GO:0055044	K17479	O	Glutaredoxin
MSTRG.8186	MR_inoculated	MS_control	2.88464	5.05576	5.96304e-05	0.00114928	Up	Yes
MSTRG.20759	MR_inoculated	MS_control	3.14063	3.08118	5.98031e-05	0.00114993	Up	Yes	XP_022641362.1		3847.GLYMA10G38541.1				K	transcription factor
MSTRG.30620	MR_inoculated	MS_control	-2.84414	6.06707	5.98566e-05	0.00114993	Down	Yes	XP_014490247.1		3847.GLYMA18G45900.1				S	polyphenol oxidase
MSTRG.4071	MR_inoculated	MS_control	-2.81224	8.19932	5.98864e-05	0.00114993	Down	Yes	XP_014494334.1		29760.VIT_19s0014g03660.t01	LHCB3-1	GO:0003674,GO:0005198,GO:0005575,GO:0005622,GO:0005623,GO:0005737,GO:0008150,GO:0008152,GO:0009507,GO:0009534,GO:0009535,GO:0009536,GO:0009579,GO:0009987,GO:0015979,GO:0016020,GO:0031976,GO:0031984,GO:0034357,GO:0042651,GO:0043226,GO:0043227,GO:0043229,GO:0043231,GO:0044237,GO:0044422,GO:0044424,GO:0044434,GO:0044435,GO:0044436,GO:0044444,GO:0044446,GO:0044464,GO:0055035	K08914	S	Chlorophyll A-B binding protein
MSTRG.9713	MR_inoculated	MS_control	2.91317	4.62067	5.99182e-05	0.00114993	Up	Yes	XP_014500476.1		3847.GLYMA06G02060.2
MSTRG.1452	MR_inoculated	MS_control	2.80593	8.84499	6.01441e-05	0.00115246	Up	Yes
MSTRG.6387	MR_inoculated	MS_control	3.08301	3.32733	6.01768e-05	0.00115246	Up	Yes	XP_014497543.1		3847.GLYMA12G30055.1
MSTRG.13634	MR_inoculated	MS_control	-2.81781	7.2881	6.07041e-05	0.00116133	Down	Yes	XP_022638397.1		3847.GLYMA16G25200.1		GO:0005575,GO:0005622,GO:0005623,GO:0005737,GO:0009507,GO:0009526,GO:0009536,GO:0009941,GO:0031967,GO:0031975,GO:0043226,GO:0043227,GO:0043229,GO:0043231,GO:0044422,GO:0044424,GO:0044434,GO:0044435,GO:0044444,GO:0044446,GO:0044464		S	hydrolase, alpha beta fold family
MSTRG.9773	MR_inoculated	MS_control	2.84217	5.96775	6.07878e-05	0.0011617	Up	Yes	XP_014501548.1		3847.GLYMA06G00930.1		GO:0005575,GO:0005623,GO:0005886,GO:0006950,GO:0008150,GO:0009266,GO:0009409,GO:0009628,GO:0016020,GO:0044464,GO:0050896,GO:0071944	K14488	S	auxin-induced
MSTRG.6174	MR_inoculated	MS_control	-3.28176	2.59801	6.21249e-05	0.001186	Down	Yes
MSTRG.16406	MR_inoculated	MS_control	3.01969	3.62644	6.24488e-05	0.00119093	Up	Yes	XP_014509184.1		29760.VIT_11s0118g00450.t01
MSTRG.20375	MR_inoculated	MS_control	-2.89376	4.7874	6.26616e-05	0.00119373	Down	Yes	XP_014510979.1		3847.GLYMA10G34780.1		GO:0001071,GO:0003674,GO:0003700,GO:0006355,GO:0008150,GO:0009719,GO:0009725,GO:0009737,GO:0009889,GO:0010033,GO:0010468,GO:0010556,GO:0019219,GO:0019222,GO:0031323,GO:0031326,GO:0033993,GO:0042221,GO:0050789,GO:0050794,GO:0050896,GO:0051171,GO:0051252,GO:0060255,GO:0065007,GO:0080090,GO:0097305,GO:1901700,GO:2000112,GO:2001141		K	MYB family transcription factor
MSTRG.9250	MR_inoculated	MS_control	-3.17086	2.93163	6.27976e-05	0.00119507	Down	Yes	XP_014502287.1		3847.GLYMA14G11280.1		GO:0003674,GO:0003824,GO:0005575,GO:0005576,GO:0005615,GO:0006725,GO:0006807,GO:0008150,GO:0008152,GO:0009056,GO:0009308,GO:0009690,GO:0009823,GO:0009987,GO:0010817,GO:0016491,GO:0016645,GO:0019139,GO:0034754,GO:0042445,GO:0042447,GO:0044237,GO:0044421,GO:0044710,GO:0046483,GO:0055114,GO:0065007,GO:0065008,GO:0071704,GO:1901564	K00279	C	cytokinin dehydrogenase
MSTRG.17435	MR_inoculated	MS_control	2.90014	4.6577	6.30223e-05	0.00119809	Up	Yes	XP_022639882.1		3847.GLYMA07G39050.1
MSTRG.4887	MR_inoculated	MS_control	-2.85035	5.56994	6.3215e-05	0.00120049	Down	Yes	XP_014494808.1		3847.GLYMA19G32280.1				S	Remorin, C-terminal region
MSTRG.15763	MR_inoculated	MS_control	2.88658	4.8248	6.35107e-05	0.00120484	Up	Yes
MSTRG.26522	MR_inoculated	MS_control	2.88775	4.80463	6.35784e-05	0.00120486	Up	Yes	XP_014520447.1		3847.GLYMA07G27950.1		GO:0005575,GO:0016020	K08360	C	transmembrane ascorbate ferrireductase 3-like
MSTRG.23386	MR_inoculated	MS_control	2.88894	4.78416	6.36478e-05	0.00120492	Up	Yes	XP_014517856.1		3847.GLYMA18G07930.1	OSI_29740
MSTRG.29478	MR_inoculated	MS_control	-2.97494	3.91292	6.38144e-05	0.00120681	Down	Yes	XP_014524211.1		3847.GLYMA13G35921.1				T	serine threonine-protein kinase
MSTRG.33302	MR_inoculated	MS_control	2.99381	3.75293	6.42632e-05	0.00121403	Up	Yes	XP_022634006.1		3847.GLYMA12G13255.1			K02178	D	checkpoint serine threonine-protein kinase
MSTRG.2953	MR_inoculated	MS_control	-2.81982	6.43774	6.44687e-05	0.00121665	Down	Yes
MSTRG.7305	MR_inoculated	MS_control	2.95529	4.01684	6.52119e-05	0.00122939	Up	Yes	XP_014497019.1		3847.GLYMA18G50780.1	UPTG1	GO:0000138,GO:0003674,GO:0003824,GO:0005575,GO:0005618,GO:0005622,GO:0005623,GO:0005737,GO:0005773,GO:0005774,GO:0005794,GO:0005795,GO:0005829,GO:0005840,GO:0005911,GO:0006139,GO:0006725,GO:0006753,GO:0006793,GO:0006796,GO:0006807,GO:0006950,GO:0006970,GO:0007275,GO:0008150,GO:0008152,GO:0008194,GO:0009117,GO:0009225,GO:0009506,GO:0009555,GO:0009628,GO:0009651,GO:0009832,GO:0009987,GO:0010035,GO:…	K13379	O	reversibly glycosylated polypeptide
MSTRG.4457	MR_inoculated	MS_control	-2.84068	5.60975	6.59108e-05	0.00124127	Down	Yes	XP_014493567.1		3847.GLYMA18G23000.1
MSTRG.24322	MR_inoculated	MS_control	2.87696	4.83727	6.63703e-05	0.00124863	Up	Yes	XP_014518195.1		3847.GLYMA06G44100.1				S	GDSL esterase lipase
MSTRG.13872	MR_inoculated	MS_control	3.26648	2.58567	6.6555e-05	0.00125081	Up	Yes	XP_014507648.1		29760.VIT_08s0056g01230.t01				S	dof zinc finger protein
MSTRG.6834	MR_inoculated	MS_control	-2.81436	6.3928	6.70174e-05	0.00125819	Down	Yes	XP_014497629.2		4641.GSMUA_Achr5P12210_001			K15095	Q	KR domain
MSTRG.14915	MR_inoculated	MS_control	-2.84777	5.32798	6.75828e-05	0.00126749	Down	Yes	XP_014509735.1		3847.GLYMA02G06610.1				S	Protein of unknown function, DUF607
MSTRG.24458	MR_inoculated	MS_control	2.78044	9.87569	6.8176e-05	0.0012773	Up	Yes	XP_014517699.1		3847.GLYMA13G30680.3		GO:0005575,GO:0005576		S	GDSL esterase lipase At5g45950-like
MSTRG.4989	MR_inoculated	MS_control	-2.82429	5.84538	6.87126e-05	0.00128602	Down	Yes	XP_014495342.1		3847.GLYMA19G36170.1				K	Myb-like DNA-binding domain
MSTRG.14144	MR_inoculated	MS_control	2.85176	5.13061	6.8973e-05	0.00128956	Up	Yes	XP_014508110.1		3847.GLYMA07G34380.1		GO:0005575,GO:0005622,GO:0005623,GO:0005737,GO:0005739,GO:0043226,GO:0043227,GO:0043229,GO:0043231,GO:0044424,GO:0044444,GO:0044464	K04078	O	10 kDa chaperonin-like
MSTRG.17226	MR_inoculated	MS_control	-2.90471	4.40037	6.91534e-05	0.0012916	Down	Yes	XP_014505900.1		3847.GLYMA07G40250.1				E	transporter
MSTRG.4317	MR_inoculated	MS_control	-2.77858	9.25768	6.92406e-05	0.0012919	Down	Yes	XP_014494340.1		3847.GLYMA18G01830.1		GO:0001071,GO:0003674,GO:0003676,GO:0003677,GO:0003700,GO:0005488,GO:0005575,GO:0005622,GO:0005623,GO:0005634,GO:0006355,GO:0006950,GO:0007154,GO:0007165,GO:0008150,GO:0009414,GO:0009415,GO:0009628,GO:0009719,GO:0009725,GO:0009737,GO:0009738,GO:0009755,GO:0009787,GO:0009788,GO:0009889,GO:0009891,GO:0009893,GO:0009966,GO:0009968,GO:0009987,GO:0010033,GO:0010035,GO:0010468,GO:0010556,GO:0010557,GO:…	K09338	K	homeobox-leucine zipper protein
MSTRG.8327	MR_inoculated	MS_control	2.81444	5.98914	6.9982e-05	0.00130439	Up	Yes
MSTRG.1163	MR_inoculated	MS_control	2.87634	4.66051	7.08568e-05	0.00131933	Up	Yes	XP_014503055.1		3847.GLYMA16G32960.1		GO:0003674,GO:0003676,GO:0003677,GO:0003824,GO:0004634,GO:0005488,GO:0005507,GO:0005575,GO:0005576,GO:0005622,GO:0005623,GO:0005634,GO:0005737,GO:0005739,GO:0005740,GO:0005829,GO:0005886,GO:0005911,GO:0006950,GO:0006970,GO:0008150,GO:0008152,GO:0009266,GO:0009314,GO:0009409,GO:0009416,GO:0009506,GO:0009507,GO:0009536,GO:0009628,GO:0009651,GO:0009719,GO:0009725,GO:0009737,GO:0010033,GO:0010035,GO:…	K01689	G	enolase (EC 4.2.1.11)
MSTRG.15997	MR_inoculated	MS_control	-2.85095	5.06069	7.13044e-05	0.00132549	Down	Yes	XP_022639361.1		3847.GLYMA0005S50.1				S	SBP domain
MSTRG.7713	MR_inoculated	MS_control	-3.25482	2.57435	7.13339e-05	0.00132549	Down	Yes
MSTRG.2129	MR_inoculated	MS_control	-2.79659	6.57367	7.17929e-05	0.00133266	Down	Yes
MSTRG.25859	MR_inoculated	MS_control	2.95994	3.81477	7.22122e-05	0.00133907	Up	Yes	XP_014520658.1		3847.GLYMA11G09060.1				T	receptor-like protein kinase
MSTRG.7867	MR_inoculated	MS_control	-2.84017	5.20051	7.25075e-05	0.00134317	Down	Yes	XP_014502427.1		3847.GLYMA15G20550.1		GO:0005575,GO:0005618,GO:0005623,GO:0009505,GO:0030312,GO:0044464,GO:0071944	K01051	G	pectinesterase
MSTRG.6350	MR_inoculated	MS_control	-2.77793	7.94327	7.26253e-05	0.00134398	Down	Yes	XP_014497883.1		3847.GLYMA13G40140.1	HDS	GO:0002376,GO:0003674,GO:0003824,GO:0005488,GO:0005575,GO:0005622,GO:0005623,GO:0005737,GO:0006081,GO:0006082,GO:0006090,GO:0006629,GO:0006644,GO:0006720,GO:0006793,GO:0006796,GO:0006950,GO:0006952,GO:0006955,GO:0007154,GO:0007165,GO:0008150,GO:0008152,GO:0008299,GO:0008610,GO:0008654,GO:0009058,GO:0009240,GO:0009507,GO:0009526,GO:0009532,GO:0009536,GO:0009570,GO:0009607,GO:0009617,GO:0009627,GO:…	K03526	H	4-hydroxy-3-methylbut-2-en-1-yl diphosphate
MSTRG.25471	MR_inoculated	MS_control	-2.77556	8.05029	7.31338e-05	0.001352	Down	Yes	XP_014519353.1		3847.GLYMA11G05280.1		GO:0006807,GO:0007275,GO:0008150,GO:0008152,GO:0009653,GO:0009887,GO:0009965,GO:0010016,GO:0032501,GO:0032502,GO:0044699,GO:0044707,GO:0044767,GO:0048366,GO:0048367,GO:0048513,GO:0048731,GO:0048827,GO:0048856,GO:0060776		S	lob domain-containing protein
MSTRG.4341	MR_inoculated	MS_control	-2.87613	4.56243	7.43538e-05	0.00137316	Down	Yes
MSTRG.15849	MR_inoculated	MS_control	2.81334	5.64498	7.46134e-05	0.00137655	Up	Yes	XP_022638582.1		3847.GLYMA07G31961.1	OSI_01259
MSTRG.27586	MR_inoculated	MS_control	-3.0548	3.23294	7.50238e-05	0.00138271	Down	Yes	XP_014522317.1		3847.GLYMA06G12610.2			K00166	C	2-oxoisovalerate dehydrogenase subunit alpha
MSTRG.29345	MR_inoculated	MS_control	-2.85123	4.87471	7.53062e-05	0.00138651	Down	Yes	XP_014524111.1		3847.GLYMA07G05560.1				U	vacuolar protein sorting-associated protein 8 homolog
MSTRG.11189	MR_inoculated	MS_control	-2.83408	5.16334	7.55067e-05	0.00138856	Down	Yes	XP_022637525.1		3847.GLYMA14G01930.1				S	zinc finger CCCH domain-containing protein
MSTRG.846	MR_inoculated	MS_control	2.76352	8.71624	7.55709e-05	0.00138856	Up	Yes	XP_014507024.1		3847.GLYMA07G10820.1				U	nonspecific lipid-transfer protein
MSTRG.22942	MR_inoculated	MS_control	-3.20999	2.65549	7.58893e-05	0.00139184	Down	Yes
MSTRG.3305	MR_inoculated	MS_control	2.76992	7.75125	7.59032e-05	0.00139184	Up	Yes	XP_014493889.1		59689.fgenesh2_kg.5__1755__AT3G53730.1				B	Core component of nucleosome. Nucleosomes wrap and compact DNA into chromatin, limiting DNA accessibility to the cellular machineries which require DNA as a template. Histones thereby play a central role in transcription regulation, DNA repair, DNA replication and chromosomal stability. DNA accessibility is regulated via a complex set of post-translational modifications of histones, also called h…
MSTRG.23872	MR_inoculated	MS_control	2.82941	5.1921	7.59963e-05	0.00139214	Up	Yes	XP_014517933.2		3847.GLYMA15G14720.2				S	desiccation-related protein
MSTRG.2127	MR_inoculated	MS_control	-3.24116	2.56238	7.64918e-05	0.0013998	Down	Yes	XP_022642699.1		3847.GLYMA17G33261.1		GO:0003674,GO:0003676,GO:0003677,GO:0005488,GO:0005575,GO:0005622,GO:0005623,GO:0005634,GO:0006325,GO:0006355,GO:0006996,GO:0007154,GO:0007165,GO:0007275,GO:0008150,GO:0008283,GO:0009719,GO:0009725,GO:0009733,GO:0009735,GO:0009736,GO:0009739,GO:0009755,GO:0009787,GO:0009788,GO:0009889,GO:0009890,GO:0009892,GO:0009966,GO:0009968,GO:0009987,GO:0010033,GO:0010468,GO:0010556,GO:0010558,GO:0010605,GO:…	K11643	K	CHD3-type chromatin-remodeling factor
MSTRG.30732	MR_inoculated	MS_control	-2.77477	7.11653	7.70272e-05	0.00140818	Down	Yes	XP_014490411.1		3847.GLYMA12G31460.3		GO:0001071,GO:0003674,GO:0003700,GO:0005575,GO:0005622,GO:0005623,GO:0005634,GO:0006355,GO:0007275,GO:0008150,GO:0009653,GO:0009888,GO:0009889,GO:0009891,GO:0009893,GO:0009987,GO:0010015,GO:0010073,GO:0010074,GO:0010078,GO:0010468,GO:0010479,GO:0010556,GO:0010557,GO:0010604,GO:0010628,GO:0019219,GO:0019222,GO:0019827,GO:0022622,GO:0030154,GO:0031323,GO:0031325,GO:0031326,GO:0031328,GO:0032501,GO:…		K	expressed protein
MSTRG.849	MR_inoculated	MS_control	2.81238	5.47505	7.75792e-05	0.00141684	Up	Yes	XP_014508621.1		3847.GLYMA07G10870.1	OSI_20880	GO:0005575,GO:0005622,GO:0005623,GO:0005737,GO:0005783,GO:0005789,GO:0012505,GO:0016020,GO:0031090,GO:0042175,GO:0043226,GO:0043227,GO:0043229,GO:0043231,GO:0044422,GO:0044424,GO:0044425,GO:0044432,GO:0044444,GO:0044446,GO:0044464		U	Reticulon-like protein
MSTRG.14138	MR_inoculated	MS_control	3.03385	3.28427	7.77479e-05	0.00141849	Up	Yes	XP_014510754.1		3847.GLYMA07G34290.2		GO:0005575,GO:0005576,GO:0005622,GO:0005623,GO:0005737,GO:0005773,GO:0043226,GO:0043227,GO:0043229,GO:0043231,GO:0044424,GO:0044444,GO:0044464	K09645	O	serine carboxypeptidase-like
MSTRG.16915	MR_inoculated	MS_control	-3.12783	2.89391	7.84307e-05	0.00142951	Down	Yes
MSTRG.710	MR_inoculated	MS_control	2.83254	5.01023	7.86091e-05	0.00143067	Up	Yes
MSTRG.22573	MR_inoculated	MS_control	2.83656	4.94028	7.86523e-05	0.00143067	Up	Yes	XP_014515005.1		3847.GLYMA03G12130.1		GO:0005575,GO:0005622,GO:0005623,GO:0005737,GO:0005739,GO:0005829,GO:0043226,GO:0043227,GO:0043229,GO:0043231,GO:0044424,GO:0044444,GO:0044464		S	UPF0160 protein MYG1
MSTRG.18979	MR_inoculated	MS_control	2.78216	6.36568	7.87391e-05	0.00143081	Up	Yes	XP_014513039.1		3847.GLYMA10G06440.1			K14488	S	Auxin responsive protein
MSTRG.27691	MR_inoculated	MS_control	2.96746	3.63218	7.90307e-05	0.00143467	Up	Yes	XP_014522414.1		3847.GLYMA14G36100.1				S	protein VERNALIZATION INSENSITIVE
MSTRG.29309	MR_inoculated	MS_control	-2.77518	6.70132	7.93533e-05	0.00143908	Down	Yes	XP_022632655.1		3847.GLYMA01G17850.3		GO:0005575,GO:0005622,GO:0005623,GO:0005737,GO:0009507,GO:0009532,GO:0009536,GO:0009570,GO:0010287,GO:0043226,GO:0043227,GO:0043229,GO:0043231,GO:0044422,GO:0044424,GO:0044434,GO:0044435,GO:0044444,GO:0044446,GO:0044464	K08869	P	ABC1 family
MSTRG.26538	MR_inoculated	MS_control	-2.77144	6.9023	7.95921e-05	0.00144197	Down	Yes	XP_014520784.1		3847.GLYMA07G26980.2	TPS1	GO:0003674,GO:0003824,GO:0003825,GO:0004805,GO:0005975,GO:0005984,GO:0005991,GO:0005992,GO:0006793,GO:0006796,GO:0008150,GO:0008152,GO:0008194,GO:0009058,GO:0009311,GO:0009312,GO:0009987,GO:0016051,GO:0016311,GO:0016740,GO:0016757,GO:0016758,GO:0016787,GO:0016788,GO:0016791,GO:0019203,GO:0034637,GO:0035251,GO:0042578,GO:0044237,GO:0044238,GO:0044249,GO:0044262,GO:0044723,GO:0046351,GO:0046527,GO:…	K16055	G	Alpha,alpha-trehalose-phosphate synthase UDP-forming
MSTRG.6770	MR_inoculated	MS_control	-3.17086	2.73231	8.01377e-05	0.00144607	Down	Yes	XP_014497972.1		3847.GLYMA18G44180.2		GO:0005575,GO:0005623,GO:0005886,GO:0016020,GO:0044464,GO:0071944		U	VHS and GAT domain containing protein, expressed
MSTRG.16477	MR_inoculated	MS_control	-3.17086	2.73231	8.01377e-05	0.00144607	Down	Yes
MSTRG.21813	MR_inoculated	MS_control	-3.17086	2.73231	8.01377e-05	0.00144607	Down	Yes	XP_014515895.1		3847.GLYMA13G07870.1				D, O	Caspase domain
MSTRG.32654	MR_inoculated	MS_control	3.16899	2.73175	8.01377e-05	0.00144607	Up	Yes	XP_014492378.1		3847.GLYMA05G28665.1				O	smt3 suppressor of mif two 3 homolog
MSTRG.9699	MR_inoculated	MS_control	-2.74997	9.05444	8.08204e-05	0.00145694	Down	Yes	XP_014499648.1		3847.GLYMA04G02100.1	FTSH1	GO:0003674,GO:0003824,GO:0004176,GO:0005575,GO:0005622,GO:0005623,GO:0005737,GO:0006091,GO:0006139,GO:0006152,GO:0006163,GO:0006195,GO:0006200,GO:0006725,GO:0006753,GO:0006793,GO:0006796,GO:0006807,GO:0008150,GO:0008152,GO:0008233,GO:0009056,GO:0009057,GO:0009116,GO:0009117,GO:0009119,GO:0009123,GO:0009125,GO:0009126,GO:0009128,GO:0009141,GO:0009143,GO:0009144,GO:0009146,GO:0009150,GO:0009154,GO:…	K03798	O	ATP-dependent zinc metalloprotease FTSH
MSTRG.28334	MR_inoculated	MS_control	3.19519	2.64362	8.10734e-05	0.00145914	Up	Yes	XP_022632306.1		29760.VIT_19s0014g00470.t01		GO:0005575,GO:0005623,GO:0005886,GO:0016020,GO:0044464,GO:0071944		T	leucine-rich repeat receptor-like serine threonine-protein kinase
MSTRG.16597	MR_inoculated	MS_control	2.90205	4.08116	8.11035e-05	0.00145914	Up	Yes	XP_014509942.1		3847.GLYMA17G07240.1		GO:0003674,GO:0003824,GO:0005575,GO:0005576,GO:0005618,GO:0005622,GO:0005623,GO:0005737,GO:0005794,GO:0006950,GO:0008150,GO:0008152,GO:0009266,GO:0009408,GO:0009409,GO:0009605,GO:0009612,GO:0009628,GO:0009664,GO:0009719,GO:0009725,GO:0009733,GO:0009741,GO:0009832,GO:0009987,GO:0010033,GO:0014070,GO:0016043,GO:0016740,GO:0016757,GO:0016758,GO:0016762,GO:0030312,GO:0033993,GO:0042221,GO:0042546,GO:…	K08235,K14504	G	Xyloglucan endotransglucosylase hydrolase protein
MSTRG.16126	MR_inoculated	MS_control	-3.22737	2.55031	8.20616e-05	0.00147491	Down	Yes
MSTRG.27497	MR_inoculated	MS_control	2.80307	5.41476	8.24073e-05	0.00147966	Up	Yes	XP_014522221.1		3847.GLYMA06G20320.1		GO:0005575,GO:0005623,GO:0005886,GO:0016020,GO:0044464,GO:0071944
MSTRG.29627	MR_inoculated	MS_control	2.96628	3.57972	8.25634e-05	0.00148099	Up	Yes	XP_014524344.1		3847.GLYMA14G23850.1
MSTRG.6343	MR_inoculated	MS_control	-2.83523	4.82045	8.30066e-05	0.00148747	Down	Yes	XP_014496994.1		3694.POPTR_0001s32800.1				M	Fasciclin domain
MSTRG.5198	MR_inoculated	MS_control	2.76835	6.31932	8.50522e-05	0.00152262	Up	Yes	XP_014495407.1		3847.GLYMA19G37780.1			K02943	J	60S acidic ribosomal protein
MSTRG.14873	MR_inoculated	MS_control	-2.74063	8.64176	8.54345e-05	0.00152795	Down	Yes	XP_014509463.1		3847.GLYMA08G09160.1	FTSH2	GO:0003674,GO:0003824,GO:0004176,GO:0005575,GO:0005622,GO:0005623,GO:0005737,GO:0006091,GO:0006139,GO:0006152,GO:0006163,GO:0006195,GO:0006200,GO:0006725,GO:0006753,GO:0006793,GO:0006796,GO:0006807,GO:0006996,GO:0008150,GO:0008152,GO:0008233,GO:0008237,GO:0009056,GO:0009057,GO:0009116,GO:0009117,GO:0009119,GO:0009123,GO:0009125,GO:0009126,GO:0009128,GO:0009141,GO:0009143,GO:0009144,GO:0009146,GO:…	K03798	O	ATP-dependent zinc metalloprotease FtsH
MSTRG.10366	MR_inoculated	MS_control	-2.87632	4.22539	8.60659e-05	0.00153773	Down	Yes	XP_014502031.1		3847.GLYMA15G40320.2		GO:0005575,GO:0005623,GO:0005886,GO:0016020,GO:0044464,GO:0071944		T	Leucine-rich repeat receptor-like protein kinase
MSTRG.7956	MR_inoculated	MS_control	2.94303	3.66053	8.66412e-05	0.00154648	Up	Yes	XP_014500390.1		3847.GLYMA09G07430.1				F	Nucleotidase that shows phosphatase activity on nucleoside 5'-monophosphates (By similarity)
MSTRG.1822	MR_inoculated	MS_control	-2.83072	4.73236	8.74225e-05	0.00155889	Down	Yes	XP_014504857.1		3847.GLYMA05G32360.1				S	Protein of unknown function (DUF506)
MSTRG.9403	MR_inoculated	MS_control	-2.88104	4.13126	8.81601e-05	0.0015705	Down	Yes	XP_014499763.1		3847.GLYMA04G04355.1			K09286	K	Transcription factor
MSTRG.18727	MR_inoculated	MS_control	3.00863	3.26224	8.85864e-05	0.0015759	Up	Yes	XP_014512938.1		3847.GLYMA19G37740.1		GO:0005575,GO:0005622,GO:0005623,GO:0005634,GO:0007275,GO:0008150,GO:0009607,GO:0009624,GO:0022622,GO:0032501,GO:0032502,GO:0043226,GO:0043227,GO:0043229,GO:0043231,GO:0044424,GO:0044464,GO:0044699,GO:0044707,GO:0044767,GO:0048364,GO:0048366,GO:0048367,GO:0048513,GO:0048580,GO:0048731,GO:0048827,GO:0048856,GO:0050789,GO:0050793,GO:0050896,GO:0051239,GO:0051704,GO:0051707,GO:0061062,GO:0065007,GO:…		K	growth-regulating factor
MSTRG.29333	MR_inoculated	MS_control	-2.73	11.067	8.86376e-05	0.0015759	Down	Yes	NP_001304228.1		3847.GLYMA12G34770.1	LHCB3-1	GO:0003674,GO:0005198,GO:0005575,GO:0005622,GO:0005623,GO:0005737,GO:0008150,GO:0008152,GO:0009507,GO:0009534,GO:0009535,GO:0009536,GO:0009579,GO:0009987,GO:0015979,GO:0016020,GO:0031976,GO:0031984,GO:0034357,GO:0042651,GO:0043226,GO:0043227,GO:0043229,GO:0043231,GO:0044237,GO:0044422,GO:0044424,GO:0044434,GO:0044435,GO:0044436,GO:0044444,GO:0044446,GO:0044464,GO:0055035	K08914	S	Chlorophyll A-B binding protein
MSTRG.24285	MR_inoculated	MS_control	-2.80893	5.00648	8.9449e-05	0.00158877	Down	Yes	XP_014517724.1		3847.GLYMA15G10070.1		GO:0006082,GO:0006629,GO:0006720,GO:0006721,GO:0008150,GO:0008152,GO:0009314,GO:0009416,GO:0009628,GO:0009639,GO:0009685,GO:0009987,GO:0010114,GO:0016101,GO:0019752,GO:0043436,GO:0044237,GO:0044238,GO:0044255,GO:0044281,GO:0044710,GO:0050896,GO:0071704	K04125	Q	gibberellin
MSTRG.5803	MR_inoculated	MS_control	2.93658	3.6549	8.95946e-05	0.0015898	Up	Yes	XP_014496253.1		3847.GLYMA17G10950.2	EXPA10	GO:0003674,GO:0005198,GO:0005199,GO:0005575,GO:0005618,GO:0005623,GO:0006949,GO:0008150,GO:0009314,GO:0009416,GO:0009505,GO:0009628,GO:0009639,GO:0009653,GO:0009664,GO:0009719,GO:0009725,GO:0009739,GO:0009827,GO:0009828,GO:0009987,GO:0010033,GO:0010114,GO:0010119,GO:0016020,GO:0016043,GO:0030312,GO:0032502,GO:0033993,GO:0042221,GO:0042545,GO:0044464,GO:0044699,GO:0044763,GO:0044767,GO:0045229,GO:…		J	loosening and extension of plant cell walls by disrupting non-covalent bonding between cellulose microfibrils and matrix glucans. No enzymatic activity has been found
MSTRG.14360	MR_inoculated	MS_control	2.98437	3.36916	8.98563e-05	0.00159288	Up	Yes	XP_014508018.1		3847.GLYMA08G41060.1		GO:0005575,GO:0005911,GO:0006950,GO:0006970,GO:0006972,GO:0008150,GO:0009414,GO:0009415,GO:0009506,GO:0009628,GO:0009651,GO:0009719,GO:0009725,GO:0009737,GO:0010033,GO:0010035,GO:0016020,GO:0030054,GO:0033993,GO:0042221,GO:0042538,GO:0050896,GO:0055044,GO:0097305,GO:1901700	K17279	U	HVA22-like protein
MSTRG.16768	MR_inoculated	MS_control	2.73051	8.7468	8.9981e-05	0.00159353	Up	Yes	XP_014510611.1		3847.GLYMA17G05670.1		GO:0003674,GO:0003824,GO:0005575,GO:0005622,GO:0005623,GO:0005737,GO:0005773,GO:0007568,GO:0008150,GO:0008152,GO:0008233,GO:0008234,GO:0016787,GO:0032502,GO:0043226,GO:0043227,GO:0043229,GO:0043231,GO:0044424,GO:0044444,GO:0044464,GO:0044699,GO:0044767,GO:0070011	K01366	O	Thiol protease
MSTRG.13385	MR_inoculated	MS_control	2.75515	6.44685	9.02429e-05	0.00159661	Up	Yes	XP_014505015.1		3847.GLYMA14G08000.1		GO:0000003,GO:0003006,GO:0003674,GO:0005488,GO:0005575,GO:0005622,GO:0005623,GO:0005634,GO:0007275,GO:0008150,GO:0009790,GO:0009791,GO:0009793,GO:0010154,GO:0022414,GO:0030246,GO:0032501,GO:0032502,GO:0043226,GO:0043227,GO:0043229,GO:0043231,GO:0044424,GO:0044464,GO:0044699,GO:0044707,GO:0044767,GO:0048316,GO:0048608,GO:0048731,GO:0048856,GO:0061458		S	F-box protein
MSTRG.4940	MR_inoculated	MS_control	2.73313	8.28377	9.04403e-05	0.00159854	Up	Yes	XP_014496235.1		59689.fgenesh2_kg.8__1917__AT5G59690.1				B	Core component of nucleosome. Nucleosomes wrap and compact DNA into chromatin, limiting DNA accessibility to the cellular machineries which require DNA as a template. Histones thereby play a central role in transcription regulation, DNA repair, DNA replication and chromosomal stability. DNA accessibility is regulated via a complex set of post-translational modifications of histones, also called h…
MSTRG.24267	MR_inoculated	MS_control	-2.73937	7.52206	9.06215e-05	0.00159894	Down	Yes	XP_022642839.1		3847.GLYMA13G29180.1		GO:0000325,GO:0003674,GO:0003824,GO:0005215,GO:0005575,GO:0005622,GO:0005623,GO:0005737,GO:0005773,GO:0005774,GO:0005911,GO:0006139,GO:0006152,GO:0006163,GO:0006195,GO:0006200,GO:0006725,GO:0006753,GO:0006793,GO:0006796,GO:0006807,GO:0006810,GO:0006811,GO:0006812,GO:0006820,GO:0008150,GO:0008152,GO:0008324,GO:0008490,GO:0008509,GO:0009056,GO:0009116,GO:0009117,GO:0009119,GO:0009123,GO:0009125,GO:…	K05666	Q	ABC transporter C family member
MSTRG.15387	MR_inoculated	MS_control	-2.73751	7.73237	9.06392e-05	0.00159894	Down	Yes	XP_014509744.1		3847.GLYMA17G14130.1			K00108	E	glucose-methanol-choline (GMC) oxidoreductase family protein
MSTRG.24542	MR_inoculated	MS_control	-2.76182	6.10367	9.1278e-05	0.00160864	Down	Yes	XP_014516910.1		3847.GLYMA13G31460.1				S	CBS domain-containing protein
MSTRG.13565	MR_inoculated	MS_control	-2.72579	8.89948	9.20484e-05	0.00161935	Down	Yes	XP_022640218.1		3847.GLYMA07G36340.1		GO:0003674,GO:0003824,GO:0004419,GO:0005488,GO:0005575,GO:0005622,GO:0005623,GO:0005737,GO:0005739,GO:0005759,GO:0008150,GO:0008152,GO:0016829,GO:0016830,GO:0016833,GO:0031974,GO:0043167,GO:0043169,GO:0043226,GO:0043227,GO:0043229,GO:0043231,GO:0043233,GO:0044422,GO:0044424,GO:0044429,GO:0044444,GO:0044446,GO:0044464,GO:0046872,GO:0070013	K01640	C, E	Hydroxymethylglutaryl-CoA lyase
MSTRG.27701	MR_inoculated	MS_control	-2.75586	6.27943	9.20645e-05	0.00161935	Down	Yes	XP_014522412.1		3847.GLYMA14G36050.1				S	Inherit from euNOG: expressed protein
MSTRG.3539	MR_inoculated	MS_control	-2.80138	5.01749	9.2609e-05	0.00162643	Down	Yes	XP_014491719.1		3847.GLYMA12G31020.1		GO:0001071,GO:0003674,GO:0003700,GO:0006355,GO:0008150,GO:0009889,GO:0010468,GO:0010556,GO:0019219,GO:0019222,GO:0031323,GO:0031326,GO:0050789,GO:0050794,GO:0051171,GO:0051252,GO:0060255,GO:0065007,GO:0080090,GO:2000112,GO:2001141		K	Transcription factor
MSTRG.6068	MR_inoculated	MS_control	3.16899	2.62072	9.26465e-05	0.00162643	Up	Yes	XP_022635289.1		3847.GLYMA18G38620.1
MSTRG.31087	MR_inoculated	MS_control	2.8328	4.50038	9.33672e-05	0.0016375	Up	Yes	XP_014490683.1		3847.GLYMA01G07780.1	OSI_12536	GO:0005575,GO:0005622,GO:0005623,GO:0005737,GO:0006139,GO:0006351,GO:0006725,GO:0006807,GO:0006996,GO:0008150,GO:0008152,GO:0009058,GO:0009059,GO:0009295,GO:0009507,GO:0009532,GO:0009536,GO:0009570,GO:0009657,GO:0009658,GO:0009662,GO:0009987,GO:0010467,GO:0016043,GO:0016070,GO:0018130,GO:0019438,GO:0032774,GO:0034641,GO:0034645,GO:0034654,GO:0042644,GO:0042646,GO:0042793,GO:0043170,GO:0043226,GO:…		G	pfkB family carbohydrate kinase
MSTRG.10005	MR_inoculated	MS_control	3.00911	3.19408	9.40881e-05	0.0016471	Up	Yes	XP_014500251.1		3847.GLYMA15G42920.3
MSTRG.30600	MR_inoculated	MS_control	2.83327	4.47507	9.40964e-05	0.0016471	Up	Yes	XP_014490266.1		3847.GLYMA18G45710.1				S	Plastocyanin-like domain
MSTRG.5565	MR_inoculated	MS_control	3.19752	2.5253	9.45843e-05	0.00165404	Up	Yes	XP_022635079.1		3847.GLYMA13G35230.1	OSI_02940		K07428	Q	secologanin synthase-like
MSTRG.17182	MR_inoculated	MS_control	-3.11297	2.78478	9.4802e-05	0.00165625	Down	Yes	XP_014507451.1		3847.GLYMA07G39950.1				S	glucan endo-1-3-beta-glucosidase
MSTRG.5975	MR_inoculated	MS_control	2.77867	5.32554	9.51361e-05	0.00166048	Up	Yes	XP_014496041.1		3847.GLYMA18G03120.1		GO:0005575,GO:0005622,GO:0005623,GO:0005737,GO:0005768,GO:0005794,GO:0005802,GO:0005886,GO:0016020,GO:0043226,GO:0043227,GO:0043229,GO:0043231,GO:0044424,GO:0044444,GO:0044464,GO:0071944	K01802	O	PPIases accelerate the folding of proteins (By similarity)
MSTRG.2779	MR_inoculated	MS_control	2.86043	4.11433	9.72054e-05	0.00169497	Up	Yes	XP_014494654.1		3847.GLYMA11G09825.1
MSTRG.15570	MR_inoculated	MS_control	2.74956	6.01133	9.75103e-05	0.00169865	Up	Yes	XP_014505754.2		3847.GLYMA07G30700.2		GO:0003674,GO:0003824,GO:0005575,GO:0005622,GO:0005623,GO:0005737,GO:0006629,GO:0006720,GO:0008150,GO:0008152,GO:0008299,GO:0008610,GO:0009058,GO:0009507,GO:0009536,GO:0009987,GO:0016829,GO:0016835,GO:0016838,GO:0034007,GO:0042214,GO:0043226,GO:0043227,GO:0043229,GO:0043231,GO:0043692,GO:0043693,GO:0044237,GO:0044238,GO:0044249,GO:0044255,GO:0044424,GO:0044444,GO:0044464,GO:0044710,GO:0046246,GO:…	K15086	S	synthase
MSTRG.8837	MR_inoculated	MS_control	-2.76483	5.51973	9.88974e-05	0.00172099	Down	Yes	XP_014501678.1		3847.GLYMA04G09370.2		GO:0003002,GO:0007275,GO:0007389,GO:0008150,GO:0010051,GO:0032501,GO:0032502,GO:0044699,GO:0044707		T	receptor-like protein kinase
MSTRG.6886	MR_inoculated	MS_control	-2.73724	6.44916	9.89825e-05	0.00172099	Down	Yes	XP_022635622.1		3847.GLYMA20G00410.2		GO:0003674,GO:0005215,GO:0005315,GO:0005575,GO:0005622,GO:0005623,GO:0005737,GO:0006810,GO:0008150,GO:0009507,GO:0009526,GO:0009528,GO:0009536,GO:0009706,GO:0009941,GO:0009987,GO:0015291,GO:0016020,GO:0019866,GO:0022804,GO:0022857,GO:0031090,GO:0031967,GO:0031969,GO:0031975,GO:0042170,GO:0043226,GO:0043227,GO:0043229,GO:0043231,GO:0044422,GO:0044424,GO:0044434,GO:0044435,GO:0044444,GO:0044446,GO:…	K08193	G	Anion transporter
MSTRG.13650	MR_inoculated	MS_control	2.92084	3.59154	0.000100666	0.00174756	Up	Yes	XP_014508118.1		3847.GLYMA16G24690.1		GO:0005575,GO:0005623,GO:0005886,GO:0016020,GO:0044464,GO:0071944	K08900	O	mitochondrial chaperone
MSTRG.16265	MR_inoculated	MS_control	3.09924	2.77387	0.000100704	0.00174756	Up	Yes
MSTRG.25253	MR_inoculated	MS_control	-2.77231	5.23297	0.000101346	0.00175703	Down	Yes	XP_022631594.1		3847.GLYMA15G38410.2		GO:0000003,GO:0003006,GO:0005575,GO:0005622,GO:0005623,GO:0005737,GO:0005783,GO:0005789,GO:0005886,GO:0007275,GO:0007276,GO:0008150,GO:0009555,GO:0009987,GO:0012505,GO:0016020,GO:0019953,GO:0022412,GO:0022414,GO:0030154,GO:0031090,GO:0032501,GO:0032502,GO:0032504,GO:0042175,GO:0043226,GO:0043227,GO:0043229,GO:0043231,GO:0044422,GO:0044424,GO:0044425,GO:0044432,GO:0044444,GO:0044446,GO:0044464,GO:…		S	single fertilization
MSTRG.2708	MR_inoculated	MS_control	2.82281	4.41311	0.000101543	0.00175832	Up	Yes	XP_014523038.1		3847.GLYMA12G01780.1			K00121	Q	Alcohol dehydrogenase-like
MSTRG.22459	MR_inoculated	MS_control	3.18333	2.51292	0.00010162	0.00175832	Up	Yes	XP_014515691.1		3847.GLYMA18G25160.1		GO:0005575,GO:0005618,GO:0005623,GO:0016020,GO:0030312,GO:0044464,GO:0071944		G	expansin
MSTRG.10926	MR_inoculated	MS_control	2.81451	4.50976	0.000101712	0.00175832	Up	Yes	XP_022637323.1		3847.GLYMA12G35820.1				T	Tyrosine 3-monooxygenase tryptophan 5-monooxygenase activation protein
MSTRG.7086	MR_inoculated	MS_control	3.05527	2.92171	0.000101809	0.00175832	Up	Yes	XP_014497147.1		3847.GLYMA09G37956.1		GO:0005575,GO:0005622,GO:0005623,GO:0005737,GO:0009507,GO:0009536,GO:0043226,GO:0043227,GO:0043229,GO:0043231,GO:0044424,GO:0044444,GO:0044464		S	Pentatricopeptide repeat-containing protein
MSTRG.15497	MR_inoculated	MS_control	2.71225	7.9492	0.000101948	0.00175904	Up	Yes	XP_014509307.1		3847.GLYMA07G30130.1				S	costars family
MSTRG.16852	MR_inoculated	MS_control	-2.92676	3.54426	0.000102312	0.00176365	Down	Yes	XP_022639722.1		3847.GLYMA13G17870.2
MSTRG.11634	MR_inoculated	MS_control	2.88901	3.75294	0.000104472	0.00179916	Up	Yes	XP_014504773.1		3847.GLYMA14G06120.1		GO:0003674,GO:0003824,GO:0004553,GO:0005575,GO:0005622,GO:0005623,GO:0005737,GO:0005773,GO:0005975,GO:0006464,GO:0006486,GO:0006487,GO:0006491,GO:0006517,GO:0008150,GO:0008152,GO:0009058,GO:0009059,GO:0009100,GO:0009101,GO:0009311,GO:0009987,GO:0016787,GO:0016798,GO:0019538,GO:0033925,GO:0034645,GO:0036211,GO:0043170,GO:0043226,GO:0043227,GO:0043229,GO:0043231,GO:0043412,GO:0043413,GO:0044237,GO:…	K01227	G	cytosolic endo-beta-N-acetylglucosaminidase-like
MSTRG.2759	MR_inoculated	MS_control	2.72538	6.44604	0.000104762	0.00180244	Up	Yes
MSTRG.3548	MR_inoculated	MS_control	-3.03348	2.98642	0.00010495	0.00180397	Down	Yes	XP_014494392.1		3847.GLYMA11G19260.1	MFP1	GO:0003674,GO:0003676,GO:0003677,GO:0005488,GO:0005575,GO:0005622,GO:0005623,GO:0005634,GO:0005737,GO:0009295,GO:0009507,GO:0009532,GO:0009534,GO:0009535,GO:0009536,GO:0009579,GO:0016020,GO:0016363,GO:0031974,GO:0031976,GO:0031981,GO:0031984,GO:0034357,GO:0034399,GO:0042646,GO:0042651,GO:0043226,GO:0043227,GO:0043228,GO:0043229,GO:0043231,GO:0043232,GO:0043233,GO:0044422,GO:0044424,GO:0044428,GO:…		S	MAR-binding filament-like protein
MSTRG.10096	MR_inoculated	MS_control	-2.75636	5.42538	0.000105221	0.00180692	Down	Yes	XP_022636968.1		3847.GLYMA11G21275.1			K08332	S	U-box domain-containing protein
MSTRG.31560	MR_inoculated	MS_control	2.7945	4.68003	0.000105419	0.00180859	Up	Yes	XP_022633463.1		3847.GLYMA19G28690.1
MSTRG.656	MR_inoculated	MS_control	-2.72133	6.62206	0.000105731	0.00181222	Down	Yes	XP_014512198.1		3847.GLYMA01G34840.1		GO:0005575,GO:0005623,GO:0005886,GO:0016020,GO:0044464,GO:0071944	K19477,K19584	T	Protein phosphatase 2C and cyclic nucleotide-binding kinase domain-containing
MSTRG.18579	MR_inoculated	MS_control	3.1423	2.59745	0.000106056	0.00181309	Up	Yes
MSTRG.11124	MR_inoculated	MS_control	2.91787	3.53755	0.000106081	0.00181309	Up	Yes	XP_014502886.1		3847.GLYMA14G01440.1				O	chaperone protein dnaJ
MSTRG.28977	MR_inoculated	MS_control	2.91787	3.53755	0.000106081	0.00181309	Up	Yes	XP_014523751.1		3847.GLYMA12G11100.1				S	Protein of unknown function (DUF1218)
MSTRG.30280	MR_inoculated	MS_control	3.08728	2.76346	0.000107011	0.00182725	Up	Yes	XP_014489963.1		3847.GLYMA04G39700.1				E	Shikimate kinase
MSTRG.23860	MR_inoculated	MS_control	2.84818	4.03428	0.000107382	0.00183186	Up	Yes	XP_022642784.1		3847.GLYMA09G03600.1			K13862	P	boron transporter
MSTRG.17715	MR_inoculated	MS_control	-2.92385	3.4884	0.000108055	0.00184162	Down	Yes	XP_022640034.1		3847.GLYMA08G01210.1		GO:0001071,GO:0003674,GO:0003700,GO:0005575,GO:0005622,GO:0005623,GO:0005634,GO:0006355,GO:0008150,GO:0009719,GO:0009725,GO:0009739,GO:0009889,GO:0010033,GO:0010468,GO:0010556,GO:0019219,GO:0019222,GO:0031323,GO:0031326,GO:0033993,GO:0042221,GO:0043226,GO:0043227,GO:0043229,GO:0043231,GO:0044424,GO:0044464,GO:0050789,GO:0050794,GO:0050896,GO:0051171,GO:0051252,GO:0060255,GO:0065007,GO:0080090,GO:…		K	Transcription factor
MSTRG.13066	MR_inoculated	MS_control	2.77425	4.88611	0.000109063	0.00185595	Up	Yes	XP_022638197.1		3847.GLYMA17G33950.3		GO:0005575,GO:0005622,GO:0005623,GO:0005737,GO:0005739,GO:0043226,GO:0043227,GO:0043229,GO:0043231,GO:0044424,GO:0044444,GO:0044464	K05605	I	3-hydroxyisobutyryl-CoA hydrolase-like protein
MSTRG.19258	MR_inoculated	MS_control	-2.69325	9.00829	0.000109101	0.00185595	Down	Yes	XP_014510988.1		3847.GLYMA10G04780.1	PSAE	GO:0005575,GO:0005622,GO:0005623,GO:0005737,GO:0009507,GO:0009526,GO:0009532,GO:0009534,GO:0009535,GO:0009536,GO:0009570,GO:0009579,GO:0009941,GO:0010287,GO:0016020,GO:0031967,GO:0031975,GO:0031976,GO:0031984,GO:0034357,GO:0042651,GO:0043226,GO:0043227,GO:0043229,GO:0043231,GO:0044422,GO:0044424,GO:0044434,GO:0044435,GO:0044436,GO:0044444,GO:0044446,GO:0044464,GO:0055035	K02693	C	photosystem I reaction center subunit IV
MSTRG.1781	MR_inoculated	MS_control	2.72752	6.00913	0.000109212	0.00185609	Up	Yes	XP_014515311.1		3847.GLYMA05G32070.1		GO:0003674,GO:0003824,GO:0004748,GO:0005575,GO:0005622,GO:0005623,GO:0005737,GO:0006139,GO:0006259,GO:0006260,GO:0006725,GO:0006753,GO:0006793,GO:0006796,GO:0006807,GO:0008150,GO:0008152,GO:0009058,GO:0009059,GO:0009117,GO:0009141,GO:0009142,GO:0009165,GO:0009200,GO:0009202,GO:0009262,GO:0009263,GO:0009987,GO:0010035,GO:0010038,GO:0016491,GO:0016725,GO:0016728,GO:0018130,GO:0019438,GO:0019637,GO:…	K10807	F	Provides the precursors necessary for DNA synthesis. Catalyzes the biosynthesis of deoxyribonucleotides from the corresponding ribonucleotides (By similarity)
MSTRG.25486	MR_inoculated	MS_control	2.83073	4.15474	0.000109757	0.0018636	Up	Yes	XP_014520331.1		3847.GLYMA11G05360.1				I	Acyl CoA binding protein
MSTRG.13116	MR_inoculated	MS_control	-3.10846	2.67786	0.000110084	0.0018674	Down	Yes	XP_022638213.1		3847.GLYMA17G34530.2		GO:0001763,GO:0005575,GO:0006629,GO:0006720,GO:0006721,GO:0006810,GO:0007275,GO:0008150,GO:0008152,GO:0008299,GO:0008610,GO:0009058,GO:0009653,GO:0009889,GO:0009891,GO:0009893,GO:0009914,GO:0009926,GO:0009934,GO:0009962,GO:0009963,GO:0009987,GO:0010016,GO:0010223,GO:0010346,GO:0010817,GO:0016020,GO:0016108,GO:0016109,GO:0016114,GO:0016116,GO:0016117,GO:0019222,GO:0022603,GO:0032501,GO:0032502,GO:…	K01832	Q	thromboxane-A synthase-like
MSTRG.2374	MR_inoculated	MS_control	2.85034	3.96324	0.000110439	0.00187168	Up	Yes	XP_014514703.1		3847.GLYMA12G33191.1
MSTRG.14530	MR_inoculated	MS_control	2.79997	4.47188	0.000110795	0.00187595	Up	Yes	XP_014505696.1		3847.GLYMA18G17600.2		GO:0005575,GO:0005622,GO:0005623,GO:0005737,GO:0008150,GO:0009295,GO:0009314,GO:0009416,GO:0009532,GO:0009536,GO:0009628,GO:0009642,GO:0010468,GO:0019222,GO:0042646,GO:0043226,GO:0043227,GO:0043228,GO:0043229,GO:0043231,GO:0043232,GO:0044422,GO:0044424,GO:0044435,GO:0044444,GO:0044446,GO:0044464,GO:0050789,GO:0050896,GO:0060255,GO:0065007
MSTRG.6032	MR_inoculated	MS_control	2.91467	3.48146	0.000112188	0.00189543	Up	Yes	XP_014497453.1		3847.GLYMA07G18460.1		GO:0003674,GO:0005488,GO:0005507,GO:0005575,GO:0005622,GO:0005623,GO:0005737,GO:0005739,GO:0005740,GO:0005743,GO:0006461,GO:0006996,GO:0007005,GO:0007275,GO:0008150,GO:0008535,GO:0009790,GO:0009987,GO:0016020,GO:0016043,GO:0019866,GO:0022607,GO:0031090,GO:0031966,GO:0031967,GO:0031975,GO:0032501,GO:0032502,GO:0033108,GO:0033617,GO:0034622,GO:0043167,GO:0043169,GO:0043226,GO:0043227,GO:0043229,GO:…	K07152	C	protein SCO1 homolog
MSTRG.25889	MR_inoculated	MS_control	-2.80538	4.397	0.000112271	0.00189543	Down	Yes	XP_014520101.1		3847.GLYMA01G36120.1		GO:0005575,GO:0005622,GO:0005623,GO:0005737,GO:0005739,GO:0005740,GO:0005743,GO:0006950,GO:0006970,GO:0008150,GO:0009628,GO:0009651,GO:0016020,GO:0019866,GO:0031090,GO:0031966,GO:0031967,GO:0031975,GO:0043226,GO:0043227,GO:0043229,GO:0043231,GO:0044422,GO:0044424,GO:0044429,GO:0044444,GO:0044446,GO:0044464,GO:0050896	K15102	C	Phosphate carrier protein
MSTRG.4324	MR_inoculated	MS_control	2.8035	4.39636	0.000112271	0.00189543	Up	Yes	XP_014493318.1		3847.GLYMA18G01890.1		GO:0005575,GO:0016020,GO:0019898,GO:0044425		V	lanC-like protein
MSTRG.25765	MR_inoculated	MS_control	-2.79192	4.56243	0.000112379	0.00189543	Down	Yes	XP_014520983.1		3847.GLYMA01G36950.1		GO:0000003,GO:0003002,GO:0003006,GO:0003674,GO:0003824,GO:0004871,GO:0004872,GO:0004888,GO:0005034,GO:0005575,GO:0005623,GO:0005886,GO:0006793,GO:0006796,GO:0006950,GO:0006970,GO:0007154,GO:0007165,GO:0007275,GO:0007389,GO:0008150,GO:0008152,GO:0009414,GO:0009415,GO:0009628,GO:0009791,GO:0009927,GO:0009987,GO:0010035,GO:0010154,GO:0010375,GO:0010431,GO:0016020,GO:0016301,GO:0016310,GO:0016740,GO:…		T	Histidine kinase
MSTRG.17520	MR_inoculated	MS_control	-2.71944	6.17519	0.000112468	0.00189543	Down	Yes	XP_014507491.1		3847.GLYMA08G03850.1		GO:0005575,GO:0005622,GO:0005623,GO:0005737,GO:0005773,GO:0008150,GO:0009719,GO:0010033,GO:0010200,GO:0010243,GO:0042221,GO:0043226,GO:0043227,GO:0043229,GO:0043231,GO:0044424,GO:0044444,GO:0044464,GO:0050896,GO:1901698,GO:1901700		S	Inherit from NOG: Avr9 Cf-9 rapidly elicited protein 146
MSTRG.14588	MR_inoculated	MS_control	2.86882	3.77903	0.000112823	0.00189965	Up	Yes	XP_014507191.1		3847.GLYMA05G06371.1				S	Targeting protein for Xklp2 (TPX2)
MSTRG.32580	MR_inoculated	MS_control	3.12877	2.58568	0.000113548	0.00190979	Up	Yes	XP_014492318.1		3847.GLYMA01G34380.2				S	Protein of unknown function (DUF1499)
MSTRG.33331	MR_inoculated	MS_control	2.8906	3.61491	0.000113637	0.00190979	Up	Yes	XP_022634022.1		3847.GLYMA16G06870.2				O	RING
MSTRG.19398	MR_inoculated	MS_control	-2.74467	5.32265	0.000114094	0.0019157	Down	Yes	XP_022640394.1		3847.GLYMA02G16630.1		GO:0000003,GO:0003006,GO:0005575,GO:0005622,GO:0005623,GO:0005737,GO:0006996,GO:0007275,GO:0008150,GO:0009507,GO:0009526,GO:0009536,GO:0009657,GO:0009668,GO:0009791,GO:0009941,GO:0009987,GO:0010027,GO:0010228,GO:0016020,GO:0016043,GO:0016044,GO:0022414,GO:0031090,GO:0031967,GO:0031969,GO:0031975,GO:0032501,GO:0032502,GO:0042170,GO:0043226,GO:0043227,GO:0043229,GO:0043231,GO:0044422,GO:0044424,GO:…		O	Dynamin family
MSTRG.16793	MR_inoculated	MS_control	2.70475	6.50662	0.000116358	0.00195191	Up	Yes	XP_014508659.1		3847.GLYMA13G17260.3				O	10 kda heat shock protein
MSTRG.5660	MR_inoculated	MS_control	3.01086	2.96781	0.000116641	0.00195485	Up	Yes	XP_014494906.1		3847.GLYMA18G04560.1		GO:0005575,GO:0005623,GO:0005886,GO:0016020,GO:0031224,GO:0031225,GO:0031226,GO:0044425,GO:0044459,GO:0044464,GO:0046658,GO:0071944	K19891	G	glucan endo-1-3-beta-glucosidase
MSTRG.7524	MR_inoculated	MS_control	2.72168	5.68555	0.000118263	0.0019802	Up	Yes
MSTRG.16464	MR_inoculated	MS_control	2.69034	7.08376	0.000119476	0.00199865	Up	Yes	XP_014508001.1		4577.GRMZM2G100467_P01	RPL39		K02924	J	60S ribosomal protein
MSTRG.24131	MR_inoculated	MS_control	-2.72577	5.49789	0.000121027	0.00202273	Down	Yes	XP_014517419.2		3847.GLYMA15G11410.1			K03327	V	protein TRANSPARENT TESTA 12-like
MSTRG.26050	MR_inoculated	MS_control	-2.72186	5.5759	0.000121641	0.00203113	Down	Yes	XP_014519327.1		3847.GLYMA09G34030.2	OSI_27903	GO:0000003,GO:0001071,GO:0003002,GO:0003006,GO:0003674,GO:0003700,GO:0005575,GO:0005622,GO:0005623,GO:0005634,GO:0006355,GO:0007275,GO:0007389,GO:0008150,GO:0009791,GO:0009798,GO:0009889,GO:0009908,GO:0009943,GO:0009944,GO:0009955,GO:0010468,GO:0010556,GO:0019219,GO:0019222,GO:0022414,GO:0031323,GO:0031326,GO:0032501,GO:0032502,GO:0035670,GO:0043226,GO:0043227,GO:0043229,GO:0043231,GO:0044424,GO:…		K	Transcription factor
MSTRG.9214	MR_inoculated	MS_control	-2.67507	8.3122	0.000123016	0.00205219	Down	Yes	XP_014502470.1		3847.GLYMA04G06240.1		GO:0005575,GO:0005622,GO:0005623,GO:0005634,GO:0043226,GO:0043227,GO:0043229,GO:0043231,GO:0044424,GO:0044464		K	Zinc finger protein CONSTANS-LIKE
MSTRG.2874	MR_inoculated	MS_control	2.69354	6.41227	0.000123845	0.00206244	Up	Yes	XP_014494622.1		3847.GLYMA12G03510.1		GO:0005575,GO:0016020,GO:0031224,GO:0031225,GO:0044425		S	thaumatin-like protein
MSTRG.2318	MR_inoculated	MS_control	-2.68605	6.91823	0.000123937	0.00206244	Down	Yes	XP_022635848.1		3847.GLYMA09G23760.1		GO:0005575,GO:0005622,GO:0005623,GO:0005737,GO:0005773,GO:0005774,GO:0016020,GO:0031090,GO:0043226,GO:0043227,GO:0043229,GO:0043231,GO:0044422,GO:0044424,GO:0044437,GO:0044444,GO:0044446,GO:0044464		P	SPX domain-containing membrane protein
MSTRG.24069	MR_inoculated	MS_control	-2.68961	6.67445	0.000123972	0.00206244	Down	Yes	XP_014517588.1		3847.GLYMA09G01080.1		GO:0005575,GO:0005622,GO:0005623,GO:0005634,GO:0005737,GO:0006950,GO:0008150,GO:0009266,GO:0009314,GO:0009409,GO:0009416,GO:0009507,GO:0009526,GO:0009532,GO:0009534,GO:0009535,GO:0009536,GO:0009570,GO:0009579,GO:0009628,GO:0009642,GO:0009644,GO:0009719,GO:0009725,GO:0009737,GO:0009892,GO:0010033,GO:0010109,GO:0010205,GO:0010287,GO:0010319,GO:0016020,GO:0019222,GO:0031323,GO:0031324,GO:0031967,GO:…		S	Plastid-lipid-Associated Protein
MSTRG.751	MR_inoculated	MS_control	-2.71325	5.66677	0.00012502	0.00207579	Down	Yes	XP_014515650.1		3847.GLYMA09G32070.1				S	Serine incorporator (Serinc)
MSTRG.16023	MR_inoculated	MS_control	-2.67898	7.37793	0.000125041	0.00207579	Down	Yes	XP_014505979.1		3847.GLYMA17G09170.1	CAS	GO:0005575,GO:0005622,GO:0005623,GO:0005737,GO:0005739,GO:0007275,GO:0008150,GO:0009314,GO:0009416,GO:0009507,GO:0009534,GO:0009535,GO:0009536,GO:0009579,GO:0009628,GO:0009639,GO:0009640,GO:0009704,GO:0009791,GO:0009987,GO:0010035,GO:0010038,GO:0010119,GO:0016020,GO:0031976,GO:0031984,GO:0032501,GO:0032502,GO:0034357,GO:0042221,GO:0042651,GO:0043226,GO:0043227,GO:0043229,GO:0043231,GO:0044422,GO:…		S	Calcium sensing receptor
MSTRG.9674	MR_inoculated	MS_control	2.66794	8.68881	0.000125118	0.00207579	Up	Yes	XP_014499790.1		3847.GLYMA06G01471.1		GO:0000003,GO:0000375,GO:0000377,GO:0000380,GO:0000398,GO:0002376,GO:0003006,GO:0003674,GO:0003676,GO:0003677,GO:0003690,GO:0003697,GO:0003723,GO:0003729,GO:0005488,GO:0005575,GO:0005576,GO:0005622,GO:0005623,GO:0005634,GO:0005737,GO:0005777,GO:0005829,GO:0005911,GO:0006139,GO:0006259,GO:0006396,GO:0006397,GO:0006403,GO:0006405,GO:0006406,GO:0006725,GO:0006807,GO:0006810,GO:0006913,GO:0006950,GO:…		A	Glycine-rich RNA-binding protein
MSTRG.4869	MR_inoculated	MS_control	2.89254	3.46227	0.000125663	0.00208293	Up	Yes	XP_014495934.1		3847.GLYMA03G29550.1		GO:0003674,GO:0005215,GO:0005575,GO:0006810,GO:0006857,GO:0008150,GO:0015197,GO:0015198,GO:0015833,GO:0016020,GO:0022892,GO:0042886,GO:0044699,GO:0044765,GO:0051179,GO:0051234,GO:0071702,GO:0071705		P	oligopeptide transporter
MSTRG.29864	MR_inoculated	MS_control	-3.14175	2.47566	0.000126407	0.00208952	Down	Yes
MSTRG.32336	MR_inoculated	MS_control	-3.14175	2.47566	0.000126407	0.00208952	Down	Yes
MSTRG.25464	MR_inoculated	MS_control	3.13988	2.47512	0.000126407	0.00208952	Up	Yes	XP_014520519.1		3847.GLYMA11G05000.1
MSTRG.7430	MR_inoculated	MS_control	-3.01346	2.88431	0.000127096	0.00209708	Down	Yes	XP_014496904.1		3847.GLYMA18G52145.1				S	BAG domain
MSTRG.17304	MR_inoculated	MS_control	3.01159	2.88375	0.000127096	0.00209708	Up	Yes	XP_014510629.1		3847.GLYMA05G34690.2
MSTRG.16196	MR_inoculated	MS_control	-2.75073	4.78739	0.000127422	0.0021	Down	Yes	XP_014506003.1		3847.GLYMA05G30290.1				S	globulin seed storage protein 2-like
MSTRG.8466	MR_inoculated	MS_control	-2.75835	4.66955	0.000127505	0.0021	Down	Yes	XP_014500978.1		3847.GLYMA04G38650.1				E	amino acid
MSTRG.19422	MR_inoculated	MS_control	-2.66295	9.01063	0.000127856	0.00210388	Down	Yes	XP_014514355.1		3847.GLYMA02G16850.1
MSTRG.21793	MR_inoculated	MS_control	-2.68763	6.44915	0.000128428	0.00211137	Down	Yes	XP_022641905.1		3847.GLYMA07G04901.1		GO:0005575,GO:0005622,GO:0005623,GO:0005737,GO:0005773,GO:0005774,GO:0016020,GO:0031090,GO:0043226,GO:0043227,GO:0043229,GO:0043231,GO:0044422,GO:0044424,GO:0044437,GO:0044444,GO:0044446,GO:0044464		I	SacI homology domain
MSTRG.111	MR_inoculated	MS_control	2.67238	7.38577	0.000128732	0.00211445	Up	Yes
MSTRG.29227	MR_inoculated	MS_control	-2.68304	6.59439	0.00012911	0.00211585	Down	Yes	XP_014523987.1		3847.GLYMA08G38750.1				S	BTB POZ domain-containing protein
MSTRG.25612	MR_inoculated	MS_control	-2.70963	5.58776	0.00012911	0.00211585	Down	Yes	XP_014520892.1		3847.GLYMA01G38650.2		GO:0001071,GO:0003674,GO:0003700,GO:0005575,GO:0005622,GO:0005623,GO:0005634,GO:0006355,GO:0007275,GO:0008150,GO:0009653,GO:0009887,GO:0009889,GO:0009965,GO:0010016,GO:0010468,GO:0010556,GO:0019219,GO:0019222,GO:0031323,GO:0031326,GO:0032501,GO:0032502,GO:0043226,GO:0043227,GO:0043229,GO:0043231,GO:0044424,GO:0044464,GO:0044699,GO:0044707,GO:0044767,GO:0048366,GO:0048367,GO:0048513,GO:0048731,GO:…		K	homeodomain protein
MSTRG.2950	MR_inoculated	MS_control	2.68745	6.31041	0.000129167	0.00211585	Up	Yes	XP_014493269.1		3847.GLYMA11G09690.1		GO:0005575,GO:0005622,GO:0005623,GO:0005634,GO:0005635,GO:0005886,GO:0005911,GO:0006950,GO:0008150,GO:0009266,GO:0009408,GO:0009506,GO:0009628,GO:0010286,GO:0012505,GO:0016020,GO:0030054,GO:0031090,GO:0031965,GO:0031967,GO:0031975,GO:0043226,GO:0043227,GO:0043229,GO:0043231,GO:0044422,GO:0044424,GO:0044428,GO:0044446,GO:0044464,GO:0050896,GO:0055044,GO:0071944		P	Farnesylated protein
MSTRG.4811	MR_inoculated	MS_control	-3.1032	2.56237	0.000130333	0.00213301	Down	Yes	XP_014495143.1		3847.GLYMA13G18590.1				S	Protein of unknown function (DUF640)
MSTRG.15378	MR_inoculated	MS_control	-2.66063	8.38772	0.00013065	0.00213627	Down	Yes	XP_014509611.1		3847.GLYMA17G14240.1		GO:0003674,GO:0003824,GO:0005575,GO:0005622,GO:0005623,GO:0005737,GO:0006091,GO:0008150,GO:0008152,GO:0009507,GO:0009534,GO:0009535,GO:0009536,GO:0009579,GO:0009767,GO:0009773,GO:0009987,GO:0015979,GO:0016020,GO:0016491,GO:0016730,GO:0019684,GO:0022900,GO:0031976,GO:0031984,GO:0034357,GO:0042651,GO:0043226,GO:0043227,GO:0043229,GO:0043231,GO:0044237,GO:0044422,GO:0044424,GO:0044434,GO:0044435,GO:…		S	PGR5-like protein 1A
MSTRG.1889	MR_inoculated	MS_control	2.75405	4.60034	0.000132083	0.00215775	Up	Yes
MSTRG.22361	MR_inoculated	MS_control	2.72904	4.99028	0.000132475	0.0021622	Up	Yes	XP_022641625.1		3847.GLYMA03G22620.1			K17592	E	Inherit from NOG: Catalyzes the reversible conversion of 3- phosphohydroxypyruvate to phosphoserine and of 3-hydroxy-2-oxo-4- phosphonooxybutanoate to phosphohydroxythreonine (By similarity)
MSTRG.15412	MR_inoculated	MS_control	2.67872	6.47824	0.000133382	0.00217506	Up	Yes	XP_014509328.1		3847.GLYMA05G03100.1	OSI_16388	GO:0003674,GO:0003824,GO:0004474,GO:0005575,GO:0005622,GO:0005623,GO:0005737,GO:0005777,GO:0008150,GO:0008152,GO:0009514,GO:0016740,GO:0016746,GO:0042579,GO:0043226,GO:0043227,GO:0043229,GO:0043231,GO:0044424,GO:0044444,GO:0044464,GO:0046912	K01638	C	malate synthase
MSTRG.24102	MR_inoculated	MS_control	2.67706	6.5459	0.000133629	0.00217711	Up	Yes	XP_014517960.1		3847.GLYMA09G00770.1		GO:0005575,GO:0005622,GO:0005623,GO:0005737,GO:0005777,GO:0005778,GO:0016020,GO:0031090,GO:0031903,GO:0042579,GO:0043226,GO:0043227,GO:0043229,GO:0043231,GO:0044422,GO:0044424,GO:0044438,GO:0044439,GO:0044444,GO:0044446,GO:0044464	K13347	S	Peroxisomal membrane protein
MSTRG.29730	MR_inoculated	MS_control	3.06782	2.64362	0.000133821	0.0021783	Up	Yes	XP_022632780.1		3847.GLYMA18G50840.2				T	Receptor like protein
MSTRG.20598	MR_inoculated	MS_control	2.88814	3.40311	0.00013402	0.00217957	Up	Yes	XP_014514180.1		3847.GLYMA20G30790.2		GO:0005575,GO:0016020,GO:0031224,GO:0031225,GO:0044425
MSTRG.23113	MR_inoculated	MS_control	2.82536	3.82483	0.00013419	0.00218037	Up	Yes	XP_014517988.1		3847.GLYMA04G41330.1
MSTRG.22065	MR_inoculated	MS_control	-2.70565	5.4805	0.000134379	0.00218068	Down	Yes	XP_014516358.1		3847.GLYMA07G08011.1				S	Protein of unknown function (DUF1446)
MSTRG.14215	MR_inoculated	MS_control	-2.76449	4.44017	0.000134449	0.00218068	Down	Yes	XP_014510379.1		3847.GLYMA20G02825.1
MSTRG.27563	MR_inoculated	MS_control	-2.67168	6.72969	0.000135336	0.0021931	Down	Yes	XP_014522300.1		3847.GLYMA06G12760.1	TL30	GO:0005575,GO:0005622,GO:0005623,GO:0005737,GO:0009507,GO:0009532,GO:0009534,GO:0009536,GO:0009543,GO:0009570,GO:0009579,GO:0031976,GO:0031977,GO:0031978,GO:0031984,GO:0043226,GO:0043227,GO:0043229,GO:0043231,GO:0044422,GO:0044424,GO:0044434,GO:0044435,GO:0044436,GO:0044444,GO:0044446,GO:0044464		S	Thylakoid lumenal 29.8 kDa protein
MSTRG.4487	MR_inoculated	MS_control	2.66067	7.51013	0.000135895	0.00220019	Up	Yes	XP_014493952.1		3847.GLYMA06G22410.1		GO:0005575,GO:0005618,GO:0005623,GO:0005886,GO:0006950,GO:0006970,GO:0008150,GO:0009505,GO:0009628,GO:0009651,GO:0009664,GO:0009825,GO:0009832,GO:0009897,GO:0009930,GO:0009986,GO:0009987,GO:0010215,GO:0016020,GO:0016043,GO:0016049,GO:0016328,GO:0022607,GO:0030198,GO:0030312,GO:0031224,GO:0031225,GO:0031226,GO:0040007,GO:0042546,GO:0043062,GO:0044085,GO:0044425,GO:0044459,GO:0044464,GO:0044699,GO:…		S	cobra-like protein
MSTRG.29074	MR_inoculated	MS_control	-3.04029	2.72158	0.000136938	0.00221509	Down	Yes	XP_022632594.1		3847.GLYMA17G29553.1				A	serine arginine repetitive matrix
MSTRG.4687	MR_inoculated	MS_control	2.86778	3.49412	0.000137145	0.00221646	Up	Yes	XP_014495376.1		3847.GLYMA19G36680.1				S	Translin family
MSTRG.14130	MR_inoculated	MS_control	-2.73578	4.77448	0.00013767	0.00222296	Down	Yes	XP_014505692.1		3847.GLYMA20G01745.1				S	Targeting protein for Xklp2 (TPX2)
MSTRG.10574	MR_inoculated	MS_control	-2.74574	4.59217	0.000139221	0.00224601	Down	Yes	XP_014501384.1		3847.GLYMA13G42990.1				G	Phosphofructokinase
MSTRG.8023	MR_inoculated	MS_control	-2.67778	6.16136	0.000139386	0.00224627	Down	Yes	XP_014501486.1		3847.GLYMA15G17870.1			K18469	U	microtubule-associated protein
MSTRG.9884	MR_inoculated	MS_control	-2.67235	6.40542	0.000139485	0.00224627	Down	Yes	XP_014501030.1		3847.GLYMA15G00390.1				I	4-coumarate-coA ligase
MSTRG.26337	MR_inoculated	MS_control	-2.69723	5.4369	0.000141369	0.00227458	Down	Yes	XP_014521100.1		3847.GLYMA02G11935.1		GO:0005575,GO:0005911,GO:0009506,GO:0030054,GO:0055044		S	Protein of unknown function (DUF1666)
MSTRG.11409	MR_inoculated	MS_control	-2.7215	4.91292	0.000141786	0.00227927	Down	Yes	XP_022637630.1		3847.GLYMA14G03910.1
MSTRG.28557	MR_inoculated	MS_control	-2.99112	2.86495	0.00014226	0.00228487	Down	Yes	XP_014523305.1		3847.GLYMA18G12750.1				I	glycerol3phosphate acyltransferase
MSTRG.26709	MR_inoculated	MS_control	-2.68916	5.59218	0.000143017	0.00229498	Down	Yes	XP_014520645.1		3847.GLYMA07G25390.1				Q	1-aminocyclopropane-1-carboxylate oxidase homolog
MSTRG.16901	MR_inoculated	MS_control	2.92671	3.12253	0.00014326	0.00229686	Up	Yes	XP_014508342.1		3847.GLYMA17G04150.1	GA2OX1	GO:0006082,GO:0006629,GO:0006720,GO:0006721,GO:0008150,GO:0008152,GO:0009685,GO:0009987,GO:0016101,GO:0019752,GO:0043436,GO:0044237,GO:0044238,GO:0044255,GO:0044281,GO:0044710,GO:0071704	K04125	Q	gibberellin
MSTRG.1476	MR_inoculated	MS_control	-2.70821	5.08599	0.000144645	0.00231701	Down	Yes
MSTRG.182	MR_inoculated	MS_control	2.9122	3.17848	0.000145045	0.00232135	Up	Yes	XP_014503328.1		3847.GLYMA19G01200.1	FDH	GO:0005575,GO:0005622,GO:0005623,GO:0005737,GO:0005739,GO:0008150,GO:0009507,GO:0009536,GO:0009579,GO:0010035,GO:0010038,GO:0042221,GO:0043226,GO:0043227,GO:0043229,GO:0043231,GO:0044424,GO:0044444,GO:0044464,GO:0046686,GO:0050896	K00122	C	formate dehydrogenase
MSTRG.11924	MR_inoculated	MS_control	-2.69239	5.42041	0.000145305	0.00232347	Down	Yes	XP_022637747.1		3847.GLYMA14G38830.1				T	Family with sequence similarity 57, member
MSTRG.10013	MR_inoculated	MS_control	-2.6445	7.98423	0.000145769	0.00232884	Down	Yes	XP_022635973.1		4113.PGSC0003DMT400020053				S	MLP-like protein
MSTRG.16434	MR_inoculated	MS_control	2.74468	4.44931	0.000146036	0.00232977	Up	Yes	XP_014508224.1		3847.GLYMA17G11370.1				O	Zinc finger (C3HC4-type RING finger) family protein
MSTRG.26005	MR_inoculated	MS_control	2.65134	7.08481	0.000146085	0.00232977	Up	Yes	XP_014519387.1		3847.GLYMA01G01390.1		GO:0005575,GO:0005622,GO:0005623,GO:0005634,GO:0005730,GO:0005737,GO:0005829,GO:0031974,GO:0031981,GO:0043226,GO:0043227,GO:0043228,GO:0043229,GO:0043231,GO:0043232,GO:0043233,GO:0044422,GO:0044424,GO:0044428,GO:0044444,GO:0044446,GO:0044464,GO:0070013	K14811	A	DEAD-box ATP-dependent RNA helicase
MSTRG.14154	MR_inoculated	MS_control	2.71261	4.92402	0.000146286	0.00233092	Up	Yes
MSTRG.5414	MR_inoculated	MS_control	3.11017	2.44936	0.000146586	0.0023316	Up	Yes	XP_014495120.2		3847.GLYMA03G37420.1	GH9B13	GO:0003674,GO:0003824,GO:0004553,GO:0005575,GO:0005576,GO:0007275,GO:0007389,GO:0008150,GO:0008152,GO:0008810,GO:0009607,GO:0009624,GO:0016787,GO:0016798,GO:0032501,GO:0032502,GO:0044699,GO:0044707,GO:0050896,GO:0051704,GO:0051707		G	Endoglucanase
MSTRG.26344	MR_inoculated	MS_control	3.11017	2.44936	0.000146586	0.0023316	Up	Yes	XP_014520163.1		3847.GLYMA01G05830.1		GO:0005575,GO:0005622,GO:0005623,GO:0005737,GO:0006139,GO:0006396,GO:0006725,GO:0006807,GO:0008150,GO:0008152,GO:0009507,GO:0009536,GO:0009987,GO:0010467,GO:0016070,GO:0031425,GO:0034641,GO:0043170,GO:0043226,GO:0043227,GO:0043229,GO:0043231,GO:0044237,GO:0044238,GO:0044260,GO:0044424,GO:0044444,GO:0044464,GO:0046483,GO:0071704,GO:0090304,GO:1901360		S	Pentatricopeptide repeat-containing protein
MSTRG.10469	MR_inoculated	MS_control	2.80213	3.84473	0.000147707	0.00234617	Up	Yes	XP_014498770.1		3847.GLYMA15G01446.1
MSTRG.29411	MR_inoculated	MS_control	2.85314	3.48146	0.000147761	0.00234617	Up	Yes	XP_014524150.1		3847.GLYMA07G32330.1				Q	Cytochrome p450
MSTRG.6267	MR_inoculated	MS_control	2.88659	3.28428	0.000148231	0.00235158	Up	Yes
MSTRG.16354	MR_inoculated	MS_control	-2.7103	4.93862	0.000148757	0.00235744	Down	Yes	XP_014508187.1		3847.GLYMA17G12170.1				S	Plastocyanin-like domain
MSTRG.6015	MR_inoculated	MS_control	-2.66247	6.26102	0.000148953	0.00235744	Down	Yes	XP_022635280.1		3847.GLYMA07G19210.2		GO:0005575,GO:0005622,GO:0005623,GO:0005737,GO:0009507,GO:0009526,GO:0009536,GO:0009941,GO:0016020,GO:0031090,GO:0031967,GO:0031969,GO:0031975,GO:0042170,GO:0043226,GO:0043227,GO:0043229,GO:0043231,GO:0044422,GO:0044424,GO:0044434,GO:0044435,GO:0044444,GO:0044446,GO:0044464		V	Mate efflux family protein
MSTRG.5662	MR_inoculated	MS_control	2.69568	5.18236	0.000148991	0.00235744	Up	Yes	XP_014495674.1		3847.GLYMA18G04697.1
MSTRG.33128	MR_inoculated	MS_control	2.70296	4.96777	0.000151593	0.00239651	Up	Yes	XP_014492831.1		3847.GLYMA18G13574.1				K	(NAC) domain-containing protein
MSTRG.6637	MR_inoculated	MS_control	2.95767	2.92172	0.000152618	0.0024088	Up	Yes	XP_022635519.1		3847.GLYMA16G05430.1		GO:0005575,GO:0005622,GO:0005623,GO:0005737,GO:0005739,GO:0043226,GO:0043227,GO:0043229,GO:0043231,GO:0044424,GO:0044444,GO:0044464		G	pentatricopeptide repeat-containing protein At3g26782
MSTRG.8211	MR_inoculated	MS_control	2.77301	4.03861	0.000152636	0.0024088	Up	Yes	XP_014500583.1		3847.GLYMA06G19400.1			K01673	P	carbonic anhydrase
MSTRG.27888	MR_inoculated	MS_control	-2.67924	5.49317	0.000153038	0.00241305	Down	Yes	XP_014522622.1		3847.GLYMA08G24180.1				I	Inherit from KOG: StAR-related lipid transfer (START) domain containing
MSTRG.23861	MR_inoculated	MS_control	-2.77077	4.06915	0.000153344	0.00241577	Down	Yes	XP_014517601.1		3847.GLYMA15G14540.1		GO:0005575,GO:0005618,GO:0005623,GO:0030312,GO:0044464,GO:0071944		M	polygalacturonase
MSTRG.15552	MR_inoculated	MS_control	-2.94127	2.98641	0.000154461	0.00242974	Down	Yes	XP_014505731.1		4113.PGSC0003DMT400075495				T	probably inactive leucine-rich repeat receptor-like protein kinase At5g48380-like
MSTRG.16207	MR_inoculated	MS_control	-2.83911	3.5197	0.000154499	0.00242974	Down	Yes	XP_014505563.1		3847.GLYMA05G30190.1	13		K01115	I	Hydrolyzes glycerol-phospholipids at the terminal phosphodiesteric bond (By similarity)
MSTRG.28224	MR_inoculated	MS_control	-2.88001	3.27756	0.000154716	0.00243104	Down	Yes
MSTRG.30087	MR_inoculated	MS_control	3.01336	2.69933	0.000155252	0.00243735	Up	Yes
MSTRG.8750	MR_inoculated	MS_control	-2.62605	8.40374	0.000156324	0.00245169	Down	Yes	XP_022636451.1		3847.GLYMA04G11550.1	ACC-1	GO:0000003,GO:0003006,GO:0003674,GO:0003824,GO:0003989,GO:0005575,GO:0005622,GO:0005623,GO:0005737,GO:0005829,GO:0005886,GO:0006082,GO:0006629,GO:0006631,GO:0006633,GO:0007275,GO:0008150,GO:0008152,GO:0008610,GO:0009058,GO:0009653,GO:0009719,GO:0009725,GO:0009735,GO:0009790,GO:0009791,GO:0009793,GO:0009888,GO:0009933,GO:0009987,GO:0010014,GO:0010016,GO:0010033,GO:0010072,GO:0010154,GO:0016020,GO:…	K11262	I	Acetyl-CoA Carboxylase
MSTRG.16807	MR_inoculated	MS_control	-2.68746	5.18887	0.000156436	0.00245169	Down	Yes	XP_022639707.1		3847.GLYMA17G05080.1			K07052	S	Inherit from KOG: Abhydrolase domain containing
MSTRG.6142	MR_inoculated	MS_control	2.76799	4.03428	0.000156602	0.00245216	Up	Yes	XP_014496587.1		3847.GLYMA18G32840.1		GO:0005575,GO:0005618,GO:0005623,GO:0005911,GO:0009505,GO:0009506,GO:0030054,GO:0030312,GO:0044464,GO:0055044,GO:0071944		G	glucan endo-1-3-beta-glucosidase
MSTRG.27666	MR_inoculated	MS_control	2.6884	5.11637	0.000156877	0.00245436	Up	Yes	XP_014522364.1		3847.GLYMA04G41970.2		GO:0005575,GO:0005576,GO:0005618,GO:0005623,GO:0030312,GO:0044464,GO:0071944	K16297	O	serine carboxypeptidase-like
MSTRG.350	MR_inoculated	MS_control	2.67186	5.48778	0.000157447	0.00245933	Up	Yes
MSTRG.28371	MR_inoculated	MS_control	2.98859	2.77388	0.000157466	0.00245933	Up	Yes	XP_014523094.1		3847.GLYMA08G45400.2		GO:0005575,GO:0005623,GO:0005886,GO:0006950,GO:0008150,GO:0009607,GO:0009611,GO:0009617,GO:0009719,GO:0009725,GO:0009751,GO:0009753,GO:0009987,GO:0010033,GO:0014070,GO:0016020,GO:0032870,GO:0042221,GO:0044464,GO:0044699,GO:0044763,GO:0050896,GO:0051704,GO:0051707,GO:0051716,GO:0070887,GO:0071310,GO:0071395,GO:0071407,GO:0071446,GO:0071495,GO:0071944,GO:1901700,GO:1901701		T	receptor like protein kinase
MSTRG.22555	MR_inoculated	MS_control	2.96655	2.84476	0.000159431	0.00248787	Up	Yes	XP_014516060.1		3847.GLYMA03G19705.1
MSTRG.959	MR_inoculated	MS_control	-2.6582	5.85276	0.000160311	0.00249945	Down	Yes	XP_014517385.1		3847.GLYMA09G30030.1				K	nucleic acid binding transcription factor zinc ion binding
MSTRG.3678	MR_inoculated	MS_control	2.76296	4.02994	0.00016068	0.00250305	Up	Yes	XP_014493553.1		3847.GLYMA12G11210.1				D, Z	calcium-binding protein
MSTRG.26905	MR_inoculated	MS_control	-2.61802	8.02896	0.000166861	0.00259709	Down	Yes	XP_022631851.1		3847.GLYMA11G36560.1				S	RHOD
MSTRG.3803	MR_inoculated	MS_control	2.97653	2.76346	0.000167245	0.00260083	Up	Yes
MSTRG.16794	MR_inoculated	MS_control	-2.62613	6.92643	0.000168479	0.0026149	Down	Yes	XP_022639701.1		3847.GLYMA17G05220.1		GO:0001071,GO:0003674,GO:0003676,GO:0003677,GO:0003700,GO:0005488,GO:0005515,GO:0005575,GO:0005622,GO:0005623,GO:0005634,GO:0006355,GO:0007154,GO:0007165,GO:0007275,GO:0008150,GO:0009314,GO:0009416,GO:0009605,GO:0009606,GO:0009628,GO:0009629,GO:0009630,GO:0009637,GO:0009638,GO:0009653,GO:0009719,GO:0009723,GO:0009725,GO:0009733,GO:0009785,GO:0009791,GO:0009886,GO:0009887,GO:0009889,GO:0009891,GO:…	K14486	K	auxin response factor
MSTRG.15983	MR_inoculated	MS_control	2.69579	4.72098	0.000168542	0.0026149	Up	Yes	XP_014505654.1		3847.GLYMA05G00370.2	RPA70B		K07466	L	Replication protein A 70 kDa DNA-binding
MSTRG.20863	MR_inoculated	MS_control	-2.65965	5.49946	0.000168582	0.0026149	Down	Yes	XP_022641409.1		3847.GLYMA20G27290.1	OSI_36451	GO:0005575,GO:0005622,GO:0005623,GO:0005737,GO:0009507,GO:0009534,GO:0009535,GO:0009536,GO:0009579,GO:0016020,GO:0031976,GO:0031984,GO:0034357,GO:0042651,GO:0043226,GO:0043227,GO:0043229,GO:0043231,GO:0044422,GO:0044424,GO:0044434,GO:0044435,GO:0044436,GO:0044444,GO:0044446,GO:0044464,GO:0055035
MSTRG.13346	MR_inoculated	MS_control	2.70404	4.57971	0.000169527	0.00262731	Up	Yes	XP_014503421.1		3847.GLYMA14G08390.1				S	pathogenesis-related protein 5-like
MSTRG.10719	MR_inoculated	MS_control	-2.74748	4.08179	0.000170031	0.00263287	Down	Yes	XP_014499606.1		3847.GLYMA06G47470.1		GO:0005575,GO:0016020		G	hexose carrier protein
MSTRG.22217	MR_inoculated	MS_control	3.07984	2.42313	0.000170349	0.00263553	Up	Yes	XP_022642091.1		3847.GLYMA13G11400.1		GO:0005575,GO:0005622,GO:0005623,GO:0005634,GO:0005737,GO:0006950,GO:0006979,GO:0008150,GO:0008284,GO:0009719,GO:0009725,GO:0009737,GO:0009743,GO:0009744,GO:0009892,GO:0009966,GO:0009987,GO:0010033,GO:0010646,GO:0010928,GO:0019222,GO:0023051,GO:0031537,GO:0031538,GO:0032991,GO:0033588,GO:0033993,GO:0034285,GO:0042127,GO:0042221,GO:0043226,GO:0043227,GO:0043229,GO:0043231,GO:0043234,GO:0043609,GO:…	K11375	B, K	elongator complex protein
MSTRG.11333	MR_inoculated	MS_control	2.9185	2.96781	0.000171538	0.00265166	Up	Yes
MSTRG.17372	MR_inoculated	MS_control	2.90281	3.02997	0.000172659	0.00266672	Up	Yes	XP_022638734.1		3847.GLYMA07G39671.1				G	glucan endo-1-3-beta-glucosidase
MSTRG.25172	MR_inoculated	MS_control	2.65228	5.49409	0.000173409	0.00267602	Up	Yes
MSTRG.15697	MR_inoculated	MS_control	2.71039	4.41977	0.000174106	0.00268449	Up	Yes	XP_014507443.1		3847.GLYMA05G01250.1		GO:0005575,GO:0005623,GO:0005886,GO:0016020,GO:0044464,GO:0071944
MSTRG.9802	MR_inoculated	MS_control	-2.68728	4.77188	0.000174601	0.00268984	Down	Yes	XP_014500057.1		3847.GLYMA04G18431.1				K	Inherit from NOG: Myb-like DNA-binding domain
MSTRG.28489	MR_inoculated	MS_control	-2.73311	4.16332	0.000175225	0.00269715	Down	Yes	XP_022632349.1		3847.GLYMA18G45220.2	SCR	GO:0001071,GO:0003002,GO:0003674,GO:0003676,GO:0003677,GO:0003700,GO:0005488,GO:0005575,GO:0005622,GO:0005623,GO:0005634,GO:0005737,GO:0006355,GO:0007275,GO:0007389,GO:0008104,GO:0008150,GO:0008356,GO:0009605,GO:0009606,GO:0009628,GO:0009629,GO:0009630,GO:0009889,GO:0009956,GO:0009987,GO:0010468,GO:0010556,GO:0019219,GO:0019222,GO:0031323,GO:0031326,GO:0032501,GO:0032502,GO:0032507,GO:0033036,GO:…		K	Transcription factor
MSTRG.643	MR_inoculated	MS_control	-2.62141	6.67652	0.000175707	0.00270228	Down	Yes	XP_014517539.1		3847.GLYMA16G08470.1				Q	)-oxidoreductase
MSTRG.25279	MR_inoculated	MS_control	-2.7105	4.39362	0.000177376	0.00272564	Down	Yes	XP_014519471.1		3847.GLYMA11G03220.1	PHR1	GO:0000719,GO:0003674,GO:0003824,GO:0003904,GO:0003913,GO:0005575,GO:0005622,GO:0005623,GO:0005634,GO:0006139,GO:0006259,GO:0006281,GO:0006290,GO:0006725,GO:0006807,GO:0006950,GO:0006974,GO:0008150,GO:0008152,GO:0009314,GO:0009411,GO:0009416,GO:0009628,GO:0009650,GO:0009987,GO:0016829,GO:0016830,GO:0033554,GO:0034641,GO:0043170,GO:0043226,GO:0043227,GO:0043229,GO:0043231,GO:0044237,GO:0044238,GO:…	K01669	L	photo-lyase
MSTRG.12894	MR_inoculated	MS_control	2.66362	5.11022	0.000177548	0.00272597	Up	Yes	XP_014505328.1		3847.GLYMA14G16130.2		GO:0007346,GO:0008150,GO:0008283,GO:0010389,GO:0010564,GO:0044699,GO:0045682,GO:0045684,GO:0048518,GO:0048580,GO:0048582,GO:0050789,GO:0050793,GO:0050794,GO:0051094,GO:0051239,GO:0051240,GO:0051726,GO:0065007,GO:1901987,GO:1901990,GO:2000026,GO:2000038,GO:2000123	K06627	D	K06627 cyclin A
MSTRG.30916	MR_inoculated	MS_control	-2.63511	5.87713	0.000179434	0.00275258	Down	Yes	XP_014490534.1		3847.GLYMA01G04500.1	OSI_08875			S	microtubule-associated protein
MSTRG.13219	MR_inoculated	MS_control	2.79439	3.57973	0.000179761	0.00275527	Up	Yes	XP_014503813.1		3694.POPTR_0014s01660.1				P	voltage-dependent anion channel
MSTRG.22922	MR_inoculated	MS_control	-2.78997	3.6213	0.000180132	0.00275684	Down	Yes
MSTRG.8931	MR_inoculated	MS_control	2.71596	4.26593	0.000180168	0.00275684	Up	Yes	XP_014500221.1		3847.GLYMA04G08330.1		GO:0001510,GO:0005575,GO:0005622,GO:0005623,GO:0005634,GO:0006139,GO:0006396,GO:0006399,GO:0006400,GO:0006725,GO:0006807,GO:0008033,GO:0008150,GO:0008152,GO:0009451,GO:0009452,GO:0009987,GO:0010467,GO:0016070,GO:0032259,GO:0034470,GO:0034641,GO:0034660,GO:0036260,GO:0036265,GO:0043170,GO:0043226,GO:0043227,GO:0043229,GO:0043231,GO:0043412,GO:0043414,GO:0044237,GO:0044238,GO:0044260,GO:0044424,GO:…	K03439	J	Catalyzes the formation of N(7)-methylguanine at position 46 (m7G46) in tRNA (By similarity)
MSTRG.6027	MR_inoculated	MS_control	2.90794	2.95871	0.000180843	0.00276251	Up	Yes
MSTRG.8103	MR_inoculated	MS_control	2.90794	2.95871	0.000180843	0.00276251	Up	Yes	XP_014500356.1		3847.GLYMA13G23445.1
MSTRG.1198	MR_inoculated	MS_control	-2.76339	3.81033	0.000181635	0.00277073	Down	Yes	XP_014515247.1		3847.GLYMA09G27410.1
MSTRG.30458	MR_inoculated	MS_control	2.64403	5.46385	0.000181687	0.00277073	Up	Yes
MSTRG.17261	MR_inoculated	MS_control	2.87882	3.08119	0.000182322	0.00277808	Up	Yes
MSTRG.20402	MR_inoculated	MS_control	-2.60112	7.85675	0.000183012	0.00278624	Down	Yes	XP_014512041.1		3847.GLYMA10G34970.1		GO:0003674,GO:0003824,GO:0004611,GO:0005575,GO:0005622,GO:0005623,GO:0005737,GO:0006091,GO:0006099,GO:0008150,GO:0008152,GO:0008964,GO:0009060,GO:0009987,GO:0015980,GO:0016829,GO:0016830,GO:0016831,GO:0044237,GO:0044238,GO:0044424,GO:0044464,GO:0044710,GO:0045333,GO:0055114	K01595	C	phosphoenolpyruvate carboxylase
MSTRG.28694	MR_inoculated	MS_control	-2.72113	4.183	0.000183799	0.00279587	Down	Yes	XP_014523440.1		3847.GLYMA06G41180.1
MSTRG.20080	MR_inoculated	MS_control	-2.81812	3.39697	0.000185092	0.00281319	Down	Yes	XP_014512940.1		3847.GLYMA10G31870.1				S	Protein of unknown function, DUF599
MSTRG.26852	MR_inoculated	MS_control	2.80831	3.44282	0.000185399	0.00281548	Up	Yes
MSTRG.31591	MR_inoculated	MS_control	2.67818	4.68556	0.000185598	0.00281615	Up	Yes	XP_014491317.1		3847.GLYMA16G04950.1		GO:0005575,GO:0005576,GO:0005618,GO:0005623,GO:0030312,GO:0044464,GO:0048046,GO:0071944	K08235	G	xyloglucan
MSTRG.467	MR_inoculated	MS_control	-2.65873	4.99538	0.000188792	0.00286222	Down	Yes
MSTRG.14991	MR_inoculated	MS_control	2.61568	6.12351	0.000189891	0.00287646	Up	Yes	XP_022639050.1		3847.GLYMA05G10673.1				S	expressed protein
MSTRG.21430	MR_inoculated	MS_control	-2.59397	7.64139	0.000191345	0.00289538	Down	Yes	XP_014516754.1		3847.GLYMA07G02460.2		GO:0003674,GO:0003824,GO:0005575,GO:0005622,GO:0005623,GO:0005737,GO:0005829,GO:0006725,GO:0008150,GO:0008152,GO:0008374,GO:0009058,GO:0009698,GO:0009699,GO:0009808,GO:0009809,GO:0009889,GO:0009891,GO:0009893,GO:0009962,GO:0009963,GO:0009987,GO:0010252,GO:0016740,GO:0016746,GO:0016747,GO:0019222,GO:0019438,GO:0019748,GO:0042592,GO:0044237,GO:0044249,GO:0044424,GO:0044444,GO:0044464,GO:0044550,GO:…	K13065	S	shikimate quinate
MSTRG.10066	MR_inoculated	MS_control	2.86904	3.07278	0.000191459	0.00289538	Up	Yes
MSTRG.19101	MR_inoculated	MS_control	2.58813	8.17942	0.000192656	0.0029105	Up	Yes	XP_014512252.1		3847.GLYMA13G18830.1				J	ribosomal protein
MSTRG.5217	MR_inoculated	MS_control	2.5845	8.69465	0.00019278	0.0029105	Up	Yes	XP_014495259.1		3847.GLYMA19G38170.1				J	Ribosomal protein
MSTRG.25764	MR_inoculated	MS_control	2.64197	5.15075	0.000195671	0.00295169	Up	Yes	XP_014519964.1		3847.GLYMA11G08320.1		GO:0005575,GO:0016020	K00428,K00434	P	peroxidase
MSTRG.3825	MR_inoculated	MS_control	2.68369	4.44606	0.000195891	0.00295255	Up	Yes	XP_014491698.1		3847.GLYMA06G43970.1	OSI_25902		K13259,K13262	S	o-methyltransferase
MSTRG.1175	MR_inoculated	MS_control	2.69869	4.25109	0.00019671	0.00296242	Up	Yes
MSTRG.8984	MR_inoculated	MS_control	-2.63792	5.24425	0.000197431	0.00297081	Down	Yes	XP_022636527.1		3847.GLYMA04G07980.1				O	zinc finger, C3HC4 type, domain containing protein, expressed
MSTRG.14107	MR_inoculated	MS_control	2.61764	5.7357	0.000198005	0.00297549	Up	Yes	XP_022638781.1		3847.GLYMA07G33810.2				S	filament-like plant protein 7-like
MSTRG.22043	MR_inoculated	MS_control	2.61254	5.90163	0.000198362	0.00297549	Up	Yes	XP_014516123.1		3847.GLYMA07G07860.1
MSTRG.5165	MR_inoculated	MS_control	-2.64381	5.09224	0.000198386	0.00297549	Down	Yes	XP_022634967.1		3847.GLYMA19G37085.1				S	Inherit from KOG: HEAT repeat
MSTRG.13921	MR_inoculated	MS_control	3.04885	2.39642	0.000198399	0.00297549	Up	Yes	XP_014506217.1		3847.GLYMA02G13570.3		GO:0005575,GO:0005623,GO:0005886,GO:0016020,GO:0044464,GO:0071944
MSTRG.13712	MR_inoculated	MS_control	2.65169	4.87164	0.000199933	0.00299602	Up	Yes	XP_014507286.1		3847.GLYMA16G23900.1
MSTRG.14305	MR_inoculated	MS_control	-2.80236	3.38342	0.000200348	0.00299975	Down	Yes	XP_022638850.1		3694.POPTR_0003s17670.1	GR	GO:0005575,GO:0005622,GO:0005623,GO:0005737,GO:0005777,GO:0042579,GO:0043226,GO:0043227,GO:0043229,GO:0043231,GO:0044424,GO:0044444,GO:0044464	K00383	Q	Glutathione reductase
MSTRG.3639	MR_inoculated	MS_control	-2.81893	3.28486	0.000200651	0.00300077	Down	Yes
MSTRG.21311	MR_inoculated	MS_control	-2.65884	4.76666	0.000200751	0.00300077	Down	Yes	XP_022641559.1		3847.GLYMA10G44041.1		GO:0001071,GO:0003674,GO:0003700,GO:0005575,GO:0005622,GO:0005623,GO:0005634,GO:0006355,GO:0008150,GO:0009889,GO:0010468,GO:0010556,GO:0019219,GO:0019222,GO:0031323,GO:0031326,GO:0043226,GO:0043227,GO:0043229,GO:0043231,GO:0044424,GO:0044464,GO:0050789,GO:0050794,GO:0051171,GO:0051252,GO:0060255,GO:0065007,GO:0080090,GO:2000112,GO:2001141		K	high mobility group
MSTRG.22347	MR_inoculated	MS_control	2.83638	3.17849	0.000200913	0.00300077	Up	Yes	XP_022641861.1		3847.GLYMA16G08940.1				S	Pfam:Yippee
MSTRG.15641	MR_inoculated	MS_control	-2.70053	4.19468	0.0002015	0.00300706	Down	Yes	XP_014508093.1		3847.GLYMA17G10050.1				S	Gibberellin regulated protein
MSTRG.21123	MR_inoculated	MS_control	2.67177	4.50665	0.000202984	0.00302671	Up	Yes	XP_014514175.1		3847.GLYMA20G24645.1		GO:0000003,GO:0003006,GO:0007275,GO:0008150,GO:0009553,GO:0009791,GO:0010154,GO:0022414,GO:0032501,GO:0032502,GO:0044699,GO:0044707,GO:0048229,GO:0048316,GO:0048608,GO:0048731,GO:0048856,GO:0061458		S	Inner centromere protein, ARK binding region
MSTRG.1054	MR_inoculated	MS_control	2.62326	5.37428	0.000204813	0.00304955	Up	Yes	XP_014496894.1		3847.GLYMA09G29070.1		GO:0005575,GO:0005622,GO:0005623,GO:0005737,GO:0044424,GO:0044464	K00001,K00121	Q	Alcohol dehydrogenase-like
MSTRG.4390	MR_inoculated	MS_control	2.61214	5.69243	0.000204852	0.00304955	Up	Yes	XP_014520354.1		3847.GLYMA18G02450.1		GO:0003674,GO:0003824,GO:0005575,GO:0005576,GO:0005618,GO:0005623,GO:0005911,GO:0006082,GO:0006518,GO:0006520,GO:0006575,GO:0006749,GO:0006751,GO:0006790,GO:0006807,GO:0006950,GO:0006979,GO:0008150,GO:0008152,GO:0009056,GO:0009063,GO:0009505,GO:0009506,GO:0009987,GO:0016054,GO:0016740,GO:0016746,GO:0016755,GO:0016756,GO:0019752,GO:0030054,GO:0030312,GO:0034641,GO:0042219,GO:0043171,GO:0043436,GO:…	K00681,K18592	E	gamma-glutamyltranspeptidase
MSTRG.19300	MR_inoculated	MS_control	-2.66279	4.62994	0.000205322	0.00305404	Down	Yes	XP_014510845.1		3847.GLYMA13G18101.1				S	Pfam:DUF593
MSTRG.3638	MR_inoculated	MS_control	-2.57029	9.40929	0.000205687	0.00305576	Down	Yes	XP_014492312.1		3847.GLYMA11G18640.1	PSAO	GO:0005575,GO:0005622,GO:0005623,GO:0005737,GO:0006091,GO:0008150,GO:0008152,GO:0009507,GO:0009521,GO:0009522,GO:0009536,GO:0009579,GO:0009765,GO:0009768,GO:0009987,GO:0015979,GO:0016020,GO:0019684,GO:0032991,GO:0034357,GO:0043226,GO:0043227,GO:0043229,GO:0043231,GO:0043234,GO:0044237,GO:0044424,GO:0044425,GO:0044436,GO:0044444,GO:0044464	K14332	S	photosystem i
MSTRG.2849	MR_inoculated	MS_control	-2.59135	6.60537	0.000205775	0.00305576	Down	Yes	XP_014494303.1		3847.GLYMA11G11010.1				S	Putative integral membrane protein conserved region (DUF2404)
MSTRG.19482	MR_inoculated	MS_control	-2.65105	4.79764	0.000206629	0.00306592	Down	Yes	XP_022640753.1		3847.GLYMA02G17240.1		GO:0000003,GO:0000902,GO:0000904,GO:0003006,GO:0008150,GO:0009653,GO:0009826,GO:0009856,GO:0009860,GO:0009932,GO:0009987,GO:0016043,GO:0016049,GO:0022414,GO:0030154,GO:0032501,GO:0032502,GO:0032989,GO:0040007,GO:0044699,GO:0044703,GO:0044706,GO:0044763,GO:0044767,GO:0048468,GO:0048588,GO:0048589,GO:0048610,GO:0048856,GO:0048868,GO:0048869,GO:0051704,GO:0060560,GO:0071840		S	BTB POZ domain-containing protein
MSTRG.21648	MR_inoculated	MS_control	2.77867	3.4687	0.00020765	0.00307855	Up	Yes	XP_014516113.1		3847.GLYMA08G20740.1		GO:0000228,GO:0000811,GO:0005575,GO:0005622,GO:0005623,GO:0005634,GO:0005654,GO:0005694,GO:0006139,GO:0006259,GO:0006260,GO:0006261,GO:0006270,GO:0006725,GO:0006807,GO:0008150,GO:0008152,GO:0009058,GO:0009059,GO:0009987,GO:0031261,GO:0031974,GO:0031981,GO:0032991,GO:0032993,GO:0034641,GO:0034645,GO:0043170,GO:0043226,GO:0043227,GO:0043228,GO:0043229,GO:0043231,GO:0043232,GO:0043233,GO:0044237,GO:…	K10735	L	DNA replication complex GINS protein
MSTRG.25102	MR_inoculated	MS_control	2.65863	4.60618	0.000209128	0.00309793	Up	Yes	XP_022631435.1		3847.GLYMA11G01570.1		GO:0005575,GO:0005622,GO:0005623,GO:0005737,GO:0009507,GO:0009536,GO:0043226,GO:0043227,GO:0043229,GO:0043231,GO:0044424,GO:0044444,GO:0044464	K17964	S	Pentatricopeptide repeat-containing protein
MSTRG.33216	MR_inoculated	MS_control	2.58433	6.64073	0.000212378	0.00314351	Up	Yes	XP_014492956.1		3847.GLYMA01G06640.1				S	Protein of unknown function, DUF538
MSTRG.17308	MR_inoculated	MS_control	-2.89301	2.86494	0.000212713	0.00314406	Down	Yes	XP_014508094.1		3847.GLYMA07G10390.1		GO:0005575,GO:0005622,GO:0005623,GO:0005737,GO:0009507,GO:0009536,GO:0043226,GO:0043227,GO:0043229,GO:0043231,GO:0044424,GO:0044444,GO:0044464		S	Protein of unknown function (DUF1639)
MSTRG.29908	MR_inoculated	MS_control	-2.57523	7.38941	0.000212783	0.00314406	Down	Yes	XP_014524564.1		3847.GLYMA18G20870.2		GO:0003674,GO:0005215,GO:0005575,GO:0005622,GO:0005623,GO:0005737,GO:0006810,GO:0006811,GO:0006817,GO:0006820,GO:0008150,GO:0008509,GO:0009507,GO:0009526,GO:0009528,GO:0009536,GO:0009673,GO:0009706,GO:0009941,GO:0009987,GO:0015075,GO:0015103,GO:0015114,GO:0015698,GO:0016020,GO:0019866,GO:0022857,GO:0022891,GO:0022892,GO:0031090,GO:0031967,GO:0031969,GO:0031975,GO:0034220,GO:0035435,GO:0042170,GO:…	K14640	P	phosphate transporter
MSTRG.24762	MR_inoculated	MS_control	2.61473	5.39129	0.000212936	0.00314406	Up	Yes	XP_014517837.1		29760.VIT_13s0064g00880.t01				J	60s ribosomal protein
MSTRG.31539	MR_inoculated	MS_control	2.56435	8.8828	0.000213223	0.00314573	Up	Yes	XP_014491284.1		3847.GLYMA19G28990.1				Z	Tubulin is the major constituent of microtubules. It binds two moles of GTP, one at an exchangeable site on the beta chain and one at a non-exchangeable site on the alpha chain (By similarity)
MSTRG.479	MR_inoculated	MS_control	2.77764	3.41647	0.000216278	0.00318821	Up	Yes	XP_014506724.1		3847.GLYMA08G05680.1			K17479	O	Glutaredoxin
MSTRG.25082	MR_inoculated	MS_control	-2.65469	4.58034	0.000216897	0.00319353	Down	Yes	XP_014519235.1		3847.GLYMA11G01390.1				S	Plant protein of unknown function (DUF946)
MSTRG.24708	MR_inoculated	MS_control	2.78456	3.36917	0.000216992	0.00319353	Up	Yes	XP_014517784.1		3847.GLYMA13G33070.2				O	Heat shock protein
MSTRG.13380	MR_inoculated	MS_control	2.79999	3.26964	0.000218519	0.0032134	Up	Yes	XP_014504009.1		3847.GLYMA17G36960.1				Z	Ubox domain-containing protein
MSTRG.13245	MR_inoculated	MS_control	-2.5754	6.84907	0.000219103	0.00321937	Down	Yes	XP_014502603.1		3847.GLYMA14G09510.1		GO:0003674,GO:0003824,GO:0004067,GO:0006082,GO:0006520,GO:0006528,GO:0006530,GO:0006807,GO:0008150,GO:0008152,GO:0009056,GO:0009063,GO:0009064,GO:0009065,GO:0009066,GO:0009068,GO:0009987,GO:0010467,GO:0016054,GO:0016787,GO:0016810,GO:0016811,GO:0019538,GO:0019752,GO:0033345,GO:0034641,GO:0043170,GO:0043436,GO:0043603,GO:0044237,GO:0044238,GO:0044248,GO:0044281,GO:0044282,GO:0044710,GO:0044712,GO:…	K13051	E	isoaspartyl peptidase L-asparaginase
MSTRG.18006	MR_inoculated	MS_control	-2.64844	4.63852	0.000219388	0.00322096	Down	Yes	XP_022640370.1		3847.GLYMA02G00830.1				L, T	cryptochrome
MSTRG.11603	MR_inoculated	MS_control	2.59729	5.71828	0.000219695	0.00322285	Up	Yes	XP_014502695.1		3847.GLYMA02G42696.1				S	Pfam:DUF827
MSTRG.21657	MR_inoculated	MS_control	-2.56689	7.31286	0.000222792	0.00326365	Down	Yes	XP_014516386.1		3847.GLYMA07G01250.1		GO:0003674,GO:0003824,GO:0004553,GO:0004565,GO:0005575,GO:0005576,GO:0005618,GO:0005623,GO:0005911,GO:0008150,GO:0008152,GO:0009505,GO:0009506,GO:0015925,GO:0016787,GO:0016798,GO:0030054,GO:0030312,GO:0044464,GO:0048046,GO:0055044,GO:0071944		G	beta-galactosidase
MSTRG.26009	MR_inoculated	MS_control	-2.66951	4.30657	0.000222837	0.00326365	Down	Yes	XP_014521305.1		3847.GLYMA01G01400.1			K13457	T	Disease resistance protein
MSTRG.1485	MR_inoculated	MS_control	2.58449	6.06003	0.000223709	0.00327377	Up	Yes	XP_014512927.1		3847.GLYMA16G26070.1			K16297	O	serine carboxypeptidase-like
MSTRG.33182	MR_inoculated	MS_control	2.86491	2.92172	0.000224	0.00327539	Up	Yes	XP_014492903.1		3847.GLYMA02G12960.1				V	alpha/beta hydrolase fold
MSTRG.6730	MR_inoculated	MS_control	-2.66255	4.35249	0.000226275	0.00330598	Down	Yes	XP_014497795.1		3847.GLYMA09G40980.1	FER	GO:0000003,GO:0003674,GO:0003824,GO:0004672,GO:0005575,GO:0005618,GO:0005623,GO:0005886,GO:0005911,GO:0006464,GO:0006468,GO:0006793,GO:0006796,GO:0006950,GO:0006952,GO:0007275,GO:0008150,GO:0008152,GO:0009506,GO:0009607,GO:0009620,GO:0009791,GO:0009856,GO:0009987,GO:0010483,GO:0016020,GO:0016301,GO:0016310,GO:0016740,GO:0016772,GO:0016773,GO:0019538,GO:0022414,GO:0030054,GO:0030312,GO:0032501,GO:…		T	receptor-like protein kinase
MSTRG.9574	MR_inoculated	MS_control	-2.6796	4.14737	0.000226834	0.00331149	Down	Yes	XP_014499950.1		3847.GLYMA04G02750.1			K06966	S	Cytokinin riboside 5'-monophosphate phosphoribohydrolase
MSTRG.25970	MR_inoculated	MS_control	-2.61296	5.13935	0.000228269	0.00332783	Down	Yes	XP_022631505.1		3847.GLYMA09G34650.3				S	expressed protein
MSTRG.3650	MR_inoculated	MS_control	2.7041	3.87408	0.000228321	0.00332783	Up	Yes	XP_014493614.1		3847.GLYMA12G10500.1
MSTRG.1098	MR_inoculated	MS_control	-2.68562	4.06066	0.000229199	0.00333794	Down	Yes	XP_014506525.1		3847.GLYMA09G28750.1				S	Protein of unknown function, DUF599
MSTRG.4440	MR_inoculated	MS_control	-2.59329	5.62564	0.000229479	0.00333933	Down	Yes	XP_014494515.1		3847.GLYMA06G24470.1				S	soul heme-binding
MSTRG.9960	MR_inoculated	MS_control	2.7505	3.49412	0.000231284	0.00336195	Up	Yes	XP_014500279.1		3847.GLYMA13G44270.2	OSI_02912	GO:0003674,GO:0004872,GO:0005575,GO:0008150,GO:0008356,GO:0009719,GO:0009725,GO:0009737,GO:0009987,GO:0010033,GO:0016020,GO:0031224,GO:0031225,GO:0033993,GO:0042221,GO:0044425,GO:0044699,GO:0044763,GO:0050896,GO:0051301,GO:0097305,GO:1901700		T	Protein TOO MANY
MSTRG.7394	MR_inoculated	MS_control	-3.01906	2.36971	0.00023159	0.00336195	Down	Yes	XP_014498302.1		3847.GLYMA18G51680.1		GO:0001071,GO:0003674,GO:0003700,GO:0005575,GO:0005622,GO:0005623,GO:0005634,GO:0006355,GO:0006950,GO:0006970,GO:0008150,GO:0009266,GO:0009409,GO:0009414,GO:0009415,GO:0009628,GO:0009651,GO:0009719,GO:0009723,GO:0009725,GO:0009737,GO:0009751,GO:0009753,GO:0009889,GO:0009891,GO:0009893,GO:0009987,GO:0010033,GO:0010035,GO:0010468,GO:0010556,GO:0010557,GO:0010604,GO:0010628,GO:0014070,GO:0019219,GO:…		K	Transcription factor
MSTRG.7892	MR_inoculated	MS_control	3.01719	2.3692	0.00023159	0.00336195	Up	Yes	XP_014500730.1		3847.GLYMA09G08900.2		GO:0005575,GO:0005618,GO:0005623,GO:0030312,GO:0044464,GO:0071944	K01051	G	pectinesterase
MSTRG.6835	MR_inoculated	MS_control	-2.64892	4.46288	0.000231938	0.00336409	Down	Yes	XP_014497628.1		3847.GLYMA09G39870.1				C	Malic enzyme
MSTRG.19563	MR_inoculated	MS_control	2.6241	4.81224	0.000232272	0.00336409	Up	Yes	XP_014511164.1		3847.GLYMA02G01830.1				E	Cys/Met metabolism PLP-dependent enzyme
MSTRG.24404	MR_inoculated	MS_control	2.71716	3.73173	0.000232294	0.00336409	Up	Yes	XP_014518265.1		3847.GLYMA13G30182.1				O	GRAN
MSTRG.2093	MR_inoculated	MS_control	2.57592	6.0822	0.000232887	0.00336998	Up	Yes	XP_022634629.1		3847.GLYMA20G30720.1	ASR1			S	Abscisic stress ripening protein 2
MSTRG.13282	MR_inoculated	MS_control	-2.67865	4.08597	0.000234062	0.00338427	Down	Yes	XP_014503751.1		3847.GLYMA14G09110.1		GO:0005575,GO:0016020	K09843	Q	Abscisic acid 8'-hydroxylase
MSTRG.25855	MR_inoculated	MS_control	2.76845	3.35536	0.000235161	0.00339746	Up	Yes	XP_022643179.1		3847.GLYMA01G36420.2		GO:0005575,GO:0005622,GO:0005623,GO:0005737,GO:0009507,GO:0009536,GO:0043226,GO:0043227,GO:0043229,GO:0043231,GO:0044424,GO:0044444,GO:0044464		J	Poly A polymerase head domain
MSTRG.16431	MR_inoculated	MS_control	2.58636	5.61054	0.000235817	0.00340422	Up	Yes	XP_014510658.1		3847.GLYMA13G23410.1			K14803,K17506	T	phosphatase 2C
MSTRG.7986	MR_inoculated	MS_control	-2.55999	6.78353	0.000237865	0.00343105	Down	Yes	XP_014501116.1		3847.GLYMA09G07590.1	LCYE	GO:0003674,GO:0003824,GO:0005575,GO:0005622,GO:0005623,GO:0005737,GO:0006629,GO:0006720,GO:0006721,GO:0008150,GO:0008152,GO:0008299,GO:0008610,GO:0009058,GO:0009507,GO:0009526,GO:0009536,GO:0009941,GO:0009975,GO:0009987,GO:0016020,GO:0016108,GO:0016109,GO:0016114,GO:0016116,GO:0016117,GO:0016122,GO:0016123,GO:0016853,GO:0016860,GO:0031090,GO:0031967,GO:0031969,GO:0031975,GO:0042170,GO:0042440,GO:…	K06443,K06444	C	Lycopene epsilon cyclase
MSTRG.5978	MR_inoculated	MS_control	2.78273	3.25484	0.000238144	0.00343234	Up	Yes
MSTRG.119	MR_inoculated	MS_control	2.56655	6.29694	0.000238487	0.00343455	Up	Yes	YP_004222829.1		3702.ATMG00510.1	NAD7	GO:0005575,GO:0005622,GO:0005623,GO:0005737,GO:0005739,GO:0043226,GO:0043227,GO:0043229,GO:0043231,GO:0044424,GO:0044444,GO:0044464	K03935	C	respiratory chain. The immediate electron acceptor for the enzyme
MSTRG.5240	MR_inoculated	MS_control	2.79073	3.20182	0.000239775	0.00344762	Up	Yes	XP_014495852.1		3847.GLYMA19G25930.1		GO:0005575,GO:0005622,GO:0005623,GO:0005737,GO:0006139,GO:0006259,GO:0006260,GO:0006281,GO:0006725,GO:0006807,GO:0006950,GO:0006974,GO:0007275,GO:0008150,GO:0008152,GO:0008219,GO:0009058,GO:0009059,GO:0009987,GO:0012501,GO:0016265,GO:0032501,GO:0032502,GO:0033554,GO:0034641,GO:0034645,GO:0043170,GO:0044237,GO:0044238,GO:0044249,GO:0044260,GO:0044424,GO:0044464,GO:0044699,GO:0044707,GO:0044763,GO:…	K10808	F	ribonucleoside-diphosphate reductase small
MSTRG.24652	MR_inoculated	MS_control	2.79073	3.20182	0.000239775	0.00344762	Up	Yes	XP_014518067.1		3847.GLYMA15G06770.1	OSI_22889	GO:0006950,GO:0006952,GO:0008150,GO:0009607,GO:0009617,GO:0042742,GO:0050896,GO:0051704,GO:0051707	K13449	S	SCP
MSTRG.9955	MR_inoculated	MS_control	-2.67564	4.05212	0.000241	0.00346249	Down	Yes	XP_014501403.1		3847.GLYMA15G01060.1		GO:0005575,GO:0006950,GO:0006979,GO:0008150,GO:0016020,GO:0050896
MSTRG.9090	MR_inoculated	MS_control	-2.59061	5.39362	0.000241946	0.00347332	Down	Yes	XP_014500516.1		3847.GLYMA06G07130.1		GO:0001071,GO:0003674,GO:0003700,GO:0005575,GO:0005622,GO:0005623,GO:0005634,GO:0006355,GO:0008150,GO:0009314,GO:0009416,GO:0009628,GO:0009639,GO:0009719,GO:0009725,GO:0009733,GO:0009889,GO:0010033,GO:0010114,GO:0010218,GO:0010468,GO:0010556,GO:0019219,GO:0019222,GO:0031323,GO:0031326,GO:0042221,GO:0043226,GO:0043227,GO:0043229,GO:0043231,GO:0044424,GO:0044464,GO:0050789,GO:0050794,GO:0050896,GO:…	K14484	K	AUX/IAA family
MSTRG.20075	MR_inoculated	MS_control	-2.67966	3.9909	0.000243349	0.0034907	Down	Yes	XP_014513943.1		3847.GLYMA10G31790.1		GO:0005575,GO:0005622,GO:0005623,GO:0005737,GO:0005773,GO:0005783,GO:0043226,GO:0043227,GO:0043229,GO:0043231,GO:0044424,GO:0044444,GO:0044464		S	Putative integral membrane protein conserved region (DUF2404)
MSTRG.25510	MR_inoculated	MS_control	-2.92391	2.62126	0.000243875	0.00349548	Down	Yes	XP_022643157.1		3847.GLYMA01G39750.1		GO:0000003,GO:0003006,GO:0007275,GO:0008150,GO:0009790,GO:0009791,GO:0009793,GO:0010154,GO:0022414,GO:0032501,GO:0032502,GO:0044699,GO:0044707,GO:0044767,GO:0048316,GO:0048608,GO:0048731,GO:0048856,GO:0061458		S	Inherit from euNOG: maternal effect embryo arrest 59
MSTRG.22052	MR_inoculated	MS_control	2.57522	5.72769	0.000244761	0.00350494	Up	Yes	XP_014516034.1		3847.GLYMA03G01510.2			K17411	J	Mitochondral 37S ribosomal protein
MSTRG.20739	MR_inoculated	MS_control	2.57163	5.84965	0.000244922	0.00350494	Up	Yes	XP_014512696.1		3847.GLYMA20G29520.1		GO:0000418,GO:0000419,GO:0000428,GO:0005575,GO:0005622,GO:0005623,GO:0005634,GO:0005654,GO:0005665,GO:0016591,GO:0030880,GO:0031974,GO:0031981,GO:0032991,GO:0043226,GO:0043227,GO:0043229,GO:0043231,GO:0043233,GO:0043234,GO:0044422,GO:0044424,GO:0044428,GO:0044446,GO:0044451,GO:0044464,GO:0055029,GO:0070013	K03014	K	DNA-directed RNA polymerases I, II, and III
MSTRG.9730	MR_inoculated	MS_control	-2.56767	6.05214	0.000245823	0.00351505	Down	Yes	XP_014502093.1		3847.GLYMA04G01350.2		GO:0000271,GO:0003674,GO:0003824,GO:0005575,GO:0005622,GO:0005623,GO:0005737,GO:0005975,GO:0005976,GO:0005982,GO:0006073,GO:0008150,GO:0008152,GO:0008878,GO:0009058,GO:0009059,GO:0009250,GO:0009507,GO:0009536,GO:0009987,GO:0016051,GO:0016740,GO:0016772,GO:0016779,GO:0019252,GO:0033692,GO:0034637,GO:0034645,GO:0043170,GO:0043226,GO:0043227,GO:0043229,GO:0043231,GO:0044042,GO:0044237,GO:0044238,GO:…	K00975	M	This protein plays a role in synthesis of starch. It catalyzes the synthesis of the activated glycosyl donor, ADP- glucose from Glc-1-P and ATP
MSTRG.5411	MR_inoculated	MS_control	-2.5638	6.19663	0.00024661	0.00352353	Down	Yes	XP_014495243.1		3847.GLYMA03G37230.1		GO:0000003,GO:0003006,GO:0003674,GO:0003824,GO:0004842,GO:0005575,GO:0005622,GO:0005623,GO:0005634,GO:0006464,GO:0007154,GO:0007165,GO:0007275,GO:0007602,GO:0008150,GO:0008152,GO:0009314,GO:0009416,GO:0009581,GO:0009582,GO:0009583,GO:0009585,GO:0009605,GO:0009628,GO:0009639,GO:0009648,GO:0009791,GO:0009987,GO:0010017,GO:0010099,GO:0010228,GO:0016567,GO:0016874,GO:0016879,GO:0016881,GO:0019538,GO:…		S	Phytochrome A-associated F-box
MSTRG.30956	MR_inoculated	MS_control	-2.5529	6.73235	0.000247368	0.0035272	Down	Yes	XP_014490599.1		3847.GLYMA05G02320.1			K06195	P	Protein of unknown function (DUF525)
MSTRG.17108	MR_inoculated	MS_control	-2.83234	2.96837	0.000247451	0.0035272	Down	Yes
MSTRG.1229	MR_inoculated	MS_control	2.83046	2.96782	0.000247451	0.0035272	Up	Yes	XP_022634155.1		3847.GLYMA13G06190.1
MSTRG.31880	MR_inoculated	MS_control	2.54646	7.18724	0.000247648	0.00352723	Up	Yes	XP_014491725.1		3847.GLYMA03G36580.1	RPS28	GO:0003674,GO:0003735,GO:0005198,GO:0005575,GO:0005618,GO:0005622,GO:0005623,GO:0005737,GO:0005829,GO:0005840,GO:0005886,GO:0006403,GO:0006405,GO:0006407,GO:0006810,GO:0006913,GO:0008150,GO:0009987,GO:0015931,GO:0015935,GO:0016020,GO:0016482,GO:0022613,GO:0022626,GO:0022627,GO:0030312,GO:0030529,GO:0032991,GO:0033036,GO:0042254,GO:0043226,GO:0043228,GO:0043229,GO:0043232,GO:0044085,GO:0044391,GO:…	K02979	J	40s ribosomal protein
MSTRG.17889	MR_inoculated	MS_control	-2.56338	6.16926	0.000247855	0.0035274	Down	Yes	XP_014509474.1		3847.GLYMA05G33000.1		GO:0005575,GO:0005623,GO:0005886,GO:0016020,GO:0044464,GO:0071944		T	LRR receptor-like serine threonine-protein kinase
MSTRG.14156	MR_inoculated	MS_control	-2.97278	2.44989	0.000248171	0.00352913	Down	Yes	XP_022638799.1		3847.GLYMA06G36520.1			K08237,K12356	C, G	anthocyanidin 3-O-glucosyltransferase 5-like
MSTRG.27909	MR_inoculated	MS_control	2.84291	2.90287	0.000249713	0.00354828	Up	Yes	XP_014522666.1		3847.GLYMA12G31130.1
MSTRG.7024	MR_inoculated	MS_control	2.54892	6.83168	0.000250149	0.00355169	Up	Yes	XP_014497022.1		3847.GLYMA09G38560.1	OSI_03567			H	regulator of
MSTRG.27142	MR_inoculated	MS_control	2.69238	3.78934	0.000251834	0.00357281	Up	Yes	XP_022631921.1		3847.GLYMA15G03280.1				S	Inherit from COG: ProFAR isomerase
MSTRG.26257	MR_inoculated	MS_control	-2.59143	5.16332	0.000252253	0.00357596	Down	Yes	XP_014519188.1		3847.GLYMA02G04250.4				S	Inherit from COG: Triacylglycerol Lipase
MSTRG.23397	MR_inoculated	MS_control	-2.55411	6.44507	0.000252659	0.00357891	Down	Yes	XP_014517013.1		3847.GLYMA08G45070.1		GO:0003674,GO:0005488,GO:0005515,GO:0005575,GO:0005622,GO:0005623,GO:0005737,GO:0006457,GO:0008150,GO:0008152,GO:0009507,GO:0009532,GO:0009536,GO:0009570,GO:0009987,GO:0019538,GO:0043170,GO:0043226,GO:0043227,GO:0043229,GO:0043231,GO:0044183,GO:0044237,GO:0044238,GO:0044260,GO:0044267,GO:0044422,GO:0044424,GO:0044434,GO:0044435,GO:0044444,GO:0044446,GO:0044464,GO:0061077,GO:0071704		S	RbcX protein
MSTRG.4492	MR_inoculated	MS_control	2.62739	4.46868	0.000254062	0.00359597	Up	Yes	XP_014493342.1		3847.GLYMA05G07420.2		GO:0003674,GO:0003824,GO:0004067,GO:0005575,GO:0005622,GO:0005623,GO:0005737,GO:0005783,GO:0005829,GO:0006082,GO:0006520,GO:0006528,GO:0006530,GO:0006807,GO:0006950,GO:0008150,GO:0008152,GO:0008233,GO:0009056,GO:0009063,GO:0009064,GO:0009065,GO:0009066,GO:0009068,GO:0009414,GO:0009415,GO:0009628,GO:0009719,GO:0009725,GO:0009737,GO:0009987,GO:0010033,GO:0010035,GO:0010467,GO:0016054,GO:0016787,GO:…	K13051	E	isoaspartyl peptidase L-asparaginase
MSTRG.27741	MR_inoculated	MS_control	2.71942	3.56181	0.00025429	0.00359638	Up	Yes
MSTRG.20328	MR_inoculated	MS_control	2.6813	3.85459	0.000255972	0.00361736	Up	Yes	XP_014514509.1		3847.GLYMA10G34231.1		GO:0005575,GO:0005622,GO:0005623,GO:0005634,GO:0005694,GO:0005730,GO:0031974,GO:0031981,GO:0043226,GO:0043227,GO:0043228,GO:0043229,GO:0043231,GO:0043232,GO:0043233,GO:0044422,GO:0044424,GO:0044428,GO:0044446,GO:0044464,GO:0070013	K11252	B	Core component of nucleosome. Nucleosomes wrap and compact DNA into chromatin, limiting DNA accessibility to the cellular machineries which require DNA as a template. Histones thereby play a central role in transcription regulation, DNA repair, DNA replication and chromosomal stability. DNA accessibility is regulated via a complex set of post-translational modifications of histones, also called h…
MSTRG.17659	MR_inoculated	MS_control	-2.72558	3.51969	0.000256285	0.00361896	Down	Yes	XP_014510699.1		3847.GLYMA05G36920.2				S	Leucine rich repeat family protein
MSTRG.23484	MR_inoculated	MS_control	-2.89104	2.6889	0.000257541	0.00363385	Down	Yes	XP_014518429.1		3847.GLYMA11G27720.1	AS1	GO:0003674,GO:0003824,GO:0004066,GO:0006082,GO:0006520,GO:0006528,GO:0006529,GO:0006807,GO:0006950,GO:0007154,GO:0008150,GO:0008152,GO:0008652,GO:0009056,GO:0009058,GO:0009063,GO:0009066,GO:0009067,GO:0009267,GO:0009314,GO:0009416,GO:0009605,GO:0009628,GO:0009642,GO:0009646,GO:0009743,GO:0009744,GO:0009746,GO:0009749,GO:0009750,GO:0009987,GO:0009991,GO:0010033,GO:0016053,GO:0016054,GO:0016874,GO:…	K01953	E	asparagine synthetase
MSTRG.17093	MR_inoculated	MS_control	-2.56633	5.73768	0.000257807	0.00363402	Down	Yes	XP_014507545.1		3847.GLYMA07G38310.1				T	phosphotransfer protein
MSTRG.9916	MR_inoculated	MS_control	-2.54083	7.02677	0.000257954	0.00363402	Down	Yes	XP_014502049.1		3847.GLYMA15G00600.1	CCR2	GO:0003674,GO:0003824,GO:0005575,GO:0005622,GO:0005623,GO:0005737,GO:0005829,GO:0006725,GO:0006950,GO:0007623,GO:0008150,GO:0008152,GO:0009058,GO:0009266,GO:0009409,GO:0009628,GO:0009698,GO:0009699,GO:0009808,GO:0009809,GO:0009987,GO:0016491,GO:0016620,GO:0016621,GO:0016903,GO:0019438,GO:0019748,GO:0044237,GO:0044249,GO:0044424,GO:0044444,GO:0044464,GO:0044550,GO:0044710,GO:0044711,GO:0048511,GO:…	K09753	Q	reductase
MSTRG.13778	MR_inoculated	MS_control	2.53625	7.1984	0.000260568	0.00366799	Up	Yes	XP_022638556.1		3847.GLYMA16G22680.1	RC24	GO:0003674,GO:0003824,GO:0004553,GO:0004563,GO:0004568,GO:0005488,GO:0005575,GO:0005618,GO:0005622,GO:0005623,GO:0005737,GO:0005773,GO:0006040,GO:0006950,GO:0006952,GO:0008061,GO:0008150,GO:0008152,GO:0008843,GO:0009607,GO:0009620,GO:0015929,GO:0016231,GO:0016787,GO:0016798,GO:0030312,GO:0043226,GO:0043227,GO:0043229,GO:0043231,GO:0044424,GO:0044444,GO:0044464,GO:0050832,GO:0050896,GO:0051704,GO:…	K01183	G	chitinase
MSTRG.24933	MR_inoculated	MS_control	-2.93235	2.52584	0.000263781	0.00370746	Down	Yes	XP_022631590.1		3847.GLYMA11G00310.1			K17710	S	Pentatricopeptide repeat-containing protein
MSTRG.11215	MR_inoculated	MS_control	2.93048	2.52532	0.000263781	0.00370746	Up	Yes
MSTRG.29205	MR_inoculated	MS_control	-2.58	5.2082	0.000264209	0.0037106	Down	Yes	XP_014523955.1		3847.GLYMA07G17130.1				A	RINGv
MSTRG.16983	MR_inoculated	MS_control	-2.54549	6.36892	0.000265606	0.00372734	Down	Yes	XP_014508688.1		3847.GLYMA07G37220.1		GO:0000156,GO:0000160,GO:0001071,GO:0003674,GO:0003700,GO:0004871,GO:0005575,GO:0005622,GO:0005623,GO:0005634,GO:0006355,GO:0007154,GO:0007165,GO:0007275,GO:0008150,GO:0009719,GO:0009725,GO:0009735,GO:0009736,GO:0009755,GO:0009889,GO:0009987,GO:0010033,GO:0010380,GO:0010468,GO:0010556,GO:0019219,GO:0019222,GO:0022622,GO:0023052,GO:0031323,GO:0031326,GO:0031537,GO:0032501,GO:0032502,GO:0032870,GO:…	K14491	K	response regulator
MSTRG.25470	MR_inoculated	MS_control	2.84501	2.82487	0.000267007	0.00374205	Up	Yes	XP_014519595.2		3847.GLYMA01G40060.1				G	glycosyl hydrolase family protein 17
MSTRG.20974	MR_inoculated	MS_control	2.53615	6.81223	0.000267068	0.00374205	Up	Yes	XP_014510985.1		3847.GLYMA10G41010.1		GO:0003674,GO:0003824,GO:0005575,GO:0005618,GO:0005622,GO:0005623,GO:0005737,GO:0005783,GO:0005794,GO:0005829,GO:0006950,GO:0007154,GO:0007275,GO:0008150,GO:0008152,GO:0009267,GO:0009605,GO:0009628,GO:0009888,GO:0009987,GO:0009991,GO:0010073,GO:0016020,GO:0016036,GO:0016491,GO:0016679,GO:0016682,GO:0030312,GO:0031667,GO:0031668,GO:0031669,GO:0032501,GO:0032502,GO:0033554,GO:0042594,GO:0043226,GO:…		Q	Spore coat protein
MSTRG.5826	MR_inoculated	MS_control	2.62165	4.393	0.000268014	0.0037524	Up	Yes	XP_014495404.1		3847.GLYMA06G20730.1		GO:0005575,GO:0005622,GO:0005623,GO:0005737,GO:0005829,GO:0008150,GO:0008152,GO:0009056,GO:0009404,GO:0009407,GO:0009987,GO:0019748,GO:0044237,GO:0044248,GO:0044424,GO:0044444,GO:0044464,GO:0044710	K00799	O	glutathione s-transferase
MSTRG.29447	MR_inoculated	MS_control	-2.75183	3.28485	0.000268358	0.00375432	Down	Yes	XP_022632699.1		3847.GLYMA08G44800.1	OSI_04037		K11884	O	RNA-binding protein
MSTRG.10847	MR_inoculated	MS_control	2.53922	6.41644	0.000270299	0.00377856	Up	Yes
MSTRG.16908	MR_inoculated	MS_control	-2.86162	2.75351	0.000270517	0.00377869	Down	Yes	XP_014507955.1		3847.GLYMA17G04050.1				G	Invertase inhibitor
MSTRG.12275	MR_inoculated	MS_control	-2.80059	3.01304	0.000271371	0.00378769	Down	Yes	XP_022637867.1		3847.GLYMA14G35060.2				T	leucine rich repeat
MSTRG.22363	MR_inoculated	MS_control	2.5157	8.47626	0.000274744	0.00383183	Up	Yes	XP_014516776.1		3847.GLYMA16G09320.1	CBP1	GO:0005575,GO:0005576,GO:0005622,GO:0005623,GO:0005737,GO:0005773,GO:0043226,GO:0043227,GO:0043229,GO:0043231,GO:0044424,GO:0044444,GO:0044464	K13289,K16296	O	Serine Carboxypeptidase
MSTRG.21547	MR_inoculated	MS_control	2.89485	2.59746	0.000278479	0.00388092	Up	Yes	XP_022641904.1		3847.GLYMA08G21650.1			K09286	K	dehydration-responsive element-binding protein 3-like
MSTRG.25920	MR_inoculated	MS_control	-2.63581	4.13933	0.000279113	0.00388677	Down	Yes	XP_014521221.1		3847.GLYMA01G36000.1	OSI_23755			O	subtilisin-like
MSTRG.20957	MR_inoculated	MS_control	-2.57006	5.11701	0.000282663	0.00393189	Down	Yes	XP_014512128.1		3847.GLYMA10G40900.1		GO:0003674,GO:0003824,GO:0008150,GO:0008152,GO:0008194,GO:0016740,GO:0016757,GO:0016758,GO:0035251,GO:0046527,GO:0047215,GO:0080044	K13692	C, G	UDP-glucoronosyl and UDP-glucosyl transferase
MSTRG.7620	MR_inoculated	MS_control	2.83325	2.81481	0.000282841	0.00393189	Up	Yes
MSTRG.25572	MR_inoculated	MS_control	2.916	2.51293	0.000283004	0.00393189	Up	Yes
MSTRG.7249	MR_inoculated	MS_control	2.54085	5.86556	0.000284628	0.00395142	Up	Yes	XP_022635755.1		3847.GLYMA18G50150.1		GO:0000166,GO:0001882,GO:0001883,GO:0003674,GO:0005488,GO:0005507,GO:0005524,GO:0005575,GO:0005622,GO:0005623,GO:0005737,GO:0005739,GO:0006950,GO:0008150,GO:0009266,GO:0009409,GO:0009628,GO:0017076,GO:0030554,GO:0032549,GO:0032550,GO:0032553,GO:0032555,GO:0032559,GO:0035639,GO:0036094,GO:0043167,GO:0043168,GO:0043169,GO:0043226,GO:0043227,GO:0043229,GO:0043231,GO:0044424,GO:0044444,GO:0044464,GO:…	K12741	A	Glycine-rich RNA-binding protein
MSTRG.17687	MR_inoculated	MS_control	-2.51909	7.12924	0.000286094	0.00396873	Down	Yes	XP_014507353.1		3847.GLYMA05G37240.2
MSTRG.5689	MR_inoculated	MS_control	-2.51784	7.21109	0.000286692	0.00397398	Down	Yes	XP_014495232.1		3847.GLYMA18G04251.1		GO:0000723,GO:0000781,GO:0003674,GO:0003676,GO:0003677,GO:0003690,GO:0003691,GO:0005488,GO:0005575,GO:0005622,GO:0005623,GO:0005634,GO:0005694,GO:0006139,GO:0006259,GO:0006725,GO:0006807,GO:0006996,GO:0008150,GO:0008152,GO:0008301,GO:0009719,GO:0009725,GO:0009737,GO:0009987,GO:0010033,GO:0016043,GO:0032200,GO:0033993,GO:0034641,GO:0042162,GO:0042221,GO:0042592,GO:0043170,GO:0043226,GO:0043227,GO:…		K	Telomere repeat-binding protein
MSTRG.20050	MR_inoculated	MS_control	2.84737	2.74241	0.000287367	0.0039803	Up	Yes	XP_022640226.1		3847.GLYMA20G36040.1	WX	GO:0003674,GO:0003824,GO:0004373,GO:0005575,GO:0005622,GO:0005623,GO:0005737,GO:0005975,GO:0005976,GO:0005982,GO:0006073,GO:0008150,GO:0008152,GO:0008194,GO:0009501,GO:0009507,GO:0009536,GO:0009987,GO:0016740,GO:0016757,GO:0016758,GO:0035251,GO:0043170,GO:0043226,GO:0043227,GO:0043229,GO:0043231,GO:0044042,GO:0044237,GO:0044238,GO:0044260,GO:0044262,GO:0044264,GO:0044424,GO:0044444,GO:0044464,GO:…	K13679	M	Granule-bound starch synthase
MSTRG.11544	MR_inoculated	MS_control	2.94025	2.42314	0.000287947	0.00398529	Up	Yes	XP_014502964.2		3847.GLYMA02G43650.1				S	leucine Rich Repeat
MSTRG.22270	MR_inoculated	MS_control	-2.55055	5.51662	0.000288251	0.00398645	Down	Yes	XP_014516401.1		3847.GLYMA08G41970.1		GO:0003674,GO:0003824,GO:0004364,GO:0004601,GO:0004602,GO:0005488,GO:0005507,GO:0005575,GO:0005576,GO:0005622,GO:0005623,GO:0005737,GO:0005773,GO:0005829,GO:0005886,GO:0005911,GO:0006950,GO:0006952,GO:0008150,GO:0008152,GO:0009056,GO:0009404,GO:0009407,GO:0009506,GO:0009507,GO:0009532,GO:0009536,GO:0009570,GO:0009579,GO:0009607,GO:0009617,GO:0009987,GO:0010035,GO:0010038,GO:0010043,GO:0016020,GO:…	K00799	O	glutathione s-transferase
MSTRG.25039	MR_inoculated	MS_control	-2.5175	7.10726	0.000288718	0.00398987	Down	Yes	XP_014521326.1		3847.GLYMA01G44650.1		GO:0005575,GO:0005623,GO:0005886,GO:0016020,GO:0044464,GO:0071944		T	serine threonine-protein kinase HT1-like
MSTRG.1666	MR_inoculated	MS_control	2.70568	3.45582	0.000289044	0.00399132	Up	Yes	XP_014505079.1		29760.VIT_08s0032g00090.t01			K10756	L	Replication factor C subunit
MSTRG.11174	MR_inoculated	MS_control	-2.53728	5.86985	0.000292245	0.00403245	Down	Yes	XP_014504579.1		3847.GLYMA02G46810.1		GO:0000325,GO:0003674,GO:0003824,GO:0005215,GO:0005575,GO:0005576,GO:0005622,GO:0005623,GO:0005737,GO:0005773,GO:0005774,GO:0005911,GO:0006139,GO:0006152,GO:0006163,GO:0006195,GO:0006200,GO:0006725,GO:0006753,GO:0006793,GO:0006796,GO:0006807,GO:0006810,GO:0008150,GO:0008152,GO:0009056,GO:0009116,GO:0009117,GO:0009119,GO:0009123,GO:0009125,GO:0009126,GO:0009128,GO:0009141,GO:0009143,GO:0009144,GO:…		Q	ABC transporter C family member
MSTRG.21180	MR_inoculated	MS_control	2.51914	6.69997	0.000293183	0.00404231	Up	Yes	XP_014514483.1		3847.GLYMA20G23680.1	ASA2	GO:0003674,GO:0003824,GO:0004049,GO:0005575,GO:0005622,GO:0005623,GO:0005737,GO:0005950,GO:0006082,GO:0006520,GO:0006725,GO:0006807,GO:0008150,GO:0008152,GO:0008652,GO:0009058,GO:0009072,GO:0009073,GO:0009507,GO:0009536,GO:0009987,GO:0016053,GO:0016829,GO:0016830,GO:0016833,GO:0019438,GO:0019752,GO:0032991,GO:0043226,GO:0043227,GO:0043229,GO:0043231,GO:0043234,GO:0043436,GO:0044237,GO:0044238,GO:…	K01657	E	anthranilate synthase
MSTRG.31372	MR_inoculated	MS_control	-2.54054	5.69719	0.000294449	0.00405668	Down	Yes	XP_014491381.1		3847.GLYMA03G27800.1			K14638	E	transporter
MSTRG.13598	MR_inoculated	MS_control	-2.53449	5.9082	0.000294852	0.00405915	Down	Yes	XP_014509963.1		3847.GLYMA16G25600.1	GBF1	GO:0001071,GO:0003674,GO:0003676,GO:0003677,GO:0003700,GO:0005488,GO:0005575,GO:0005622,GO:0005623,GO:0005634,GO:0005737,GO:0006355,GO:0008150,GO:0009889,GO:0009892,GO:0010310,GO:0010468,GO:0010556,GO:0010605,GO:0010629,GO:0019219,GO:0019222,GO:0031323,GO:0031326,GO:0043226,GO:0043227,GO:0043229,GO:0043231,GO:0043565,GO:0044424,GO:0044464,GO:0048519,GO:0050789,GO:0050793,GO:0050794,GO:0051171,GO:…	K09060	K	Transcription factor
MSTRG.4748	MR_inoculated	MS_control	-2.49951	9.17518	0.000295566	0.00406215	Down	Yes	XP_014495937.1		3847.GLYMA19G34160.1		GO:0003674,GO:0005215,GO:0005575,GO:0005622,GO:0005623,GO:0005737,GO:0006810,GO:0006811,GO:0006820,GO:0008150,GO:0008272,GO:0008509,GO:0009507,GO:0009536,GO:0009987,GO:0015075,GO:0015103,GO:0015116,GO:0015698,GO:0016020,GO:0022857,GO:0022891,GO:0022892,GO:0034220,GO:0043226,GO:0043227,GO:0043229,GO:0043231,GO:0044424,GO:0044444,GO:0044464,GO:0044699,GO:0044763,GO:0044765,GO:0051179,GO:0051234,GO:…	K17471	P	sulfate transporter
MSTRG.12324	MR_inoculated	MS_control	-2.5279	6.15936	0.000295944	0.00406215	Down	Yes	XP_014504897.1		3847.GLYMA02G39370.2		GO:0003674,GO:0005215,GO:0005575,GO:0005623,GO:0005886,GO:0006810,GO:0006811,GO:0006812,GO:0006813,GO:0008150,GO:0008324,GO:0009987,GO:0015075,GO:0015077,GO:0015079,GO:0015672,GO:0016020,GO:0022857,GO:0022890,GO:0022891,GO:0022892,GO:0030001,GO:0034220,GO:0044464,GO:0044699,GO:0044763,GO:0044765,GO:0046873,GO:0051179,GO:0051234,GO:0055085,GO:0071804,GO:0071805,GO:0071944	K03549	P	potassium transporter
MSTRG.18495	MR_inoculated	MS_control	-2.56608	4.99538	0.00029613	0.00406215	Down	Yes	XP_014514874.1		3847.GLYMA02G18250.4		GO:0005575,GO:0005622,GO:0005623,GO:0005634,GO:0043226,GO:0043227,GO:0043229,GO:0043231,GO:0044424,GO:0044464		S	expressed protein
MSTRG.26045	MR_inoculated	MS_control	2.60171	4.37601	0.000296173	0.00406215	Up	Yes	XP_014520095.1		3847.GLYMA01G01840.1
MSTRG.6556	MR_inoculated	MS_control	-2.74052	3.21774	0.000296192	0.00406215	Down	Yes	XP_022635487.1		3847.GLYMA08G11730.1		GO:0001708,GO:0003002,GO:0005575,GO:0005622,GO:0005623,GO:0005634,GO:0006810,GO:0007275,GO:0007389,GO:0008150,GO:0009790,GO:0009914,GO:0009926,GO:0009987,GO:0010051,GO:0010305,GO:0010817,GO:0019827,GO:0022622,GO:0030154,GO:0032501,GO:0032502,GO:0043226,GO:0043227,GO:0043229,GO:0043231,GO:0044424,GO:0044464,GO:0044699,GO:0044707,GO:0044763,GO:0044765,GO:0044767,GO:0045165,GO:0045595,GO:0045596,GO:…		E	Inherit from NOG: Catalyzes the reversible conversion of 3- phosphohydroxypyruvate to phosphoserine and of 3-hydroxy-2-oxo-4- phosphonooxybutanoate to phosphohydroxythreonine (By similarity)
MSTRG.22255	MR_inoculated	MS_control	2.51574	6.74235	0.000297256	0.00407366	Up	Yes	XP_014515980.1		3847.GLYMA03G24900.1	CHL-CPN10	GO:0005575,GO:0005622,GO:0005623,GO:0005737,GO:0006457,GO:0008150,GO:0008152,GO:0009507,GO:0009526,GO:0009532,GO:0009536,GO:0009570,GO:0009941,GO:0009987,GO:0019538,GO:0031967,GO:0031975,GO:0043170,GO:0043226,GO:0043227,GO:0043229,GO:0043231,GO:0044237,GO:0044238,GO:0044260,GO:0044267,GO:0044422,GO:0044424,GO:0044434,GO:0044435,GO:0044444,GO:0044446,GO:0044464,GO:0071704	K04078	O	Chaperonin
MSTRG.15765	MR_inoculated	MS_control	2.88106	2.58569	0.000297769	0.00407761	Up	Yes	XP_014508083.1		3847.GLYMA08G06580.1		GO:0005575,GO:0005622,GO:0005623,GO:0005737,GO:0005739,GO:0016020,GO:0043226,GO:0043227,GO:0043229,GO:0043231,GO:0044424,GO:0044444,GO:0044464		S	Pentatricopeptide repeat-containing protein
MSTRG.17288	MR_inoculated	MS_control	-3.00316	2.22532	0.000299252	0.00409483	Down	Yes	XP_022638535.1		3847.GLYMA05G35130.2			K10406	Z	KISc
MSTRG.32788	MR_inoculated	MS_control	2.52162	6.13467	0.000303236	0.0041432	Up	Yes	XP_014492496.1		3847.GLYMA07G06100.1		GO:0005575,GO:0005618,GO:0005623,GO:0005911,GO:0008150,GO:0009505,GO:0009506,GO:0009628,GO:0016020,GO:0030054,GO:0030312,GO:0044464,GO:0050896,GO:0055044,GO:0071944,GO:0080167		O	aspartic proteinase
MSTRG.32818	MR_inoculated	MS_control	-2.52739	5.96501	0.000303245	0.0041432	Down	Yes	XP_022633839.1		3847.GLYMA19G10160.3		GO:0003674,GO:0003824,GO:0004672,GO:0004674,GO:0006464,GO:0006468,GO:0006793,GO:0006796,GO:0008150,GO:0008152,GO:0009987,GO:0016301,GO:0016310,GO:0016740,GO:0016772,GO:0016773,GO:0019538,GO:0036211,GO:0043170,GO:0043412,GO:0044237,GO:0044238,GO:0044260,GO:0044267,GO:0071704	K08286	T	protein kinase PVPK-1-like
MSTRG.11358	MR_inoculated	MS_control	-2.53922	5.49631	0.000305699	0.00417358	Down	Yes	XP_022637588.1		3847.GLYMA14G03410.1		GO:0005575,GO:0005622,GO:0005623,GO:0005737,GO:0044424,GO:0044464	K00457	E	4-hydroxyphenylpyruvate dioxygenase
MSTRG.25946	MR_inoculated	MS_control	-2.59537	4.39361	0.000306002	0.00417458	Down	Yes	XP_014520008.1		3847.GLYMA09G35190.1		GO:0005575,GO:0005622,GO:0005623,GO:0005737,GO:0009507,GO:0009526,GO:0009536,GO:0009941,GO:0031967,GO:0031975,GO:0043226,GO:0043227,GO:0043229,GO:0043231,GO:0044422,GO:0044424,GO:0044434,GO:0044435,GO:0044444,GO:0044446,GO:0044464		S	Uncharacterized protein family, UPF0114
MSTRG.5288	MR_inoculated	MS_control	-2.50159	7.33546	0.000309192	0.00421372	Down	Yes	XP_014495893.1		3847.GLYMA03G36050.1	DGD1	GO:0003674,GO:0003824,GO:0005575,GO:0005622,GO:0005623,GO:0005737,GO:0005739,GO:0006629,GO:0006643,GO:0006664,GO:0008150,GO:0008152,GO:0008194,GO:0008378,GO:0008610,GO:0009058,GO:0009247,GO:0009507,GO:0009526,GO:0009527,GO:0009536,GO:0009707,GO:0009941,GO:0009987,GO:0010109,GO:0012506,GO:0016020,GO:0016023,GO:0016740,GO:0016757,GO:0016758,GO:0019222,GO:0019374,GO:0019375,GO:0019867,GO:0030139,GO:…	K09480	M	Digalactosyldiacylglycerol synthase 1
MSTRG.11118	MR_inoculated	MS_control	-2.5619	4.89632	0.000309401	0.00421372	Down	Yes	XP_014505272.1		3847.GLYMA20G10260.1		GO:0005575,GO:0005622,GO:0005623,GO:0005634,GO:0006950,GO:0006952,GO:0008150,GO:0009607,GO:0009617,GO:0042742,GO:0043226,GO:0043227,GO:0043229,GO:0043231,GO:0044424,GO:0044464,GO:0050896,GO:0051704,GO:0051707	K12872	A	zinc finger CCCH domain-containing protein
MSTRG.13733	MR_inoculated	MS_control	2.72966	3.20952	0.000309569	0.00421372	Up	Yes	XP_014507152.1		3847.GLYMA16G23380.1				S	Tetratricopeptide repeat
MSTRG.29733	MR_inoculated	MS_control	2.6738	3.56781	0.000310308	0.00421621	Up	Yes	XP_014524396.1		3847.GLYMA12G14090.1		GO:0005575,GO:0005622,GO:0005623,GO:0005737,GO:0016020,GO:0044424,GO:0044464	K04392	S	rac-like GTP-binding protein
MSTRG.26122	MR_inoculated	MS_control	2.92467	2.40985	0.000310413	0.00421621	Up	Yes	XP_014520292.1		3847.GLYMA09G33780.1	OSI_09600	GO:0000003,GO:0003002,GO:0003006,GO:0005575,GO:0005623,GO:0005886,GO:0005911,GO:0007049,GO:0007275,GO:0007389,GO:0008150,GO:0009506,GO:0009553,GO:0009554,GO:0009653,GO:0009888,GO:0009933,GO:0009934,GO:0009956,GO:0009987,GO:0010015,GO:0010051,GO:0010305,GO:0016020,GO:0022414,GO:0022603,GO:0022622,GO:0030054,GO:0032501,GO:0032502,GO:0044464,GO:0044699,GO:0044707,GO:0044763,GO:0044767,GO:0048229,GO:…		S	Tetraspanin family
MSTRG.12696	MR_inoculated	MS_control	-2.577	4.61842	0.00031045	0.00421621	Down	Yes
MSTRG.30736	MR_inoculated	MS_control	2.79786	2.8644	0.000311399	0.00422593	Up	Yes	XP_022633122.1		3847.GLYMA13G38960.2		GO:0005575,GO:0005622,GO:0005623,GO:0005737,GO:0006139,GO:0006725,GO:0006807,GO:0008150,GO:0008152,GO:0009451,GO:0009507,GO:0009536,GO:0009987,GO:0016070,GO:0034641,GO:0043170,GO:0043226,GO:0043227,GO:0043229,GO:0043231,GO:0043412,GO:0044237,GO:0044238,GO:0044260,GO:0044424,GO:0044444,GO:0044464,GO:0046483,GO:0071704,GO:0090304,GO:1901360		S	Pentatricopeptide repeat-containing protein At1g05750
MSTRG.13590	MR_inoculated	MS_control	2.55369	4.98582	0.000312149	0.00423294	Up	Yes	XP_022638372.1		3847.GLYMA03G14760.2
MSTRG.17433	MR_inoculated	MS_control	2.56914	4.69108	0.000312675	0.0042369	Up	Yes	XP_014508682.1		3847.GLYMA07G39050.1
MSTRG.7327	MR_inoculated	MS_control	2.71061	3.30598	0.000313143	0.00424007	Up	Yes	XP_014497159.1		3847.GLYMA18G51040.1		GO:0005575,GO:0005622,GO:0005623,GO:0005737,GO:0006139,GO:0006396,GO:0006397,GO:0006725,GO:0006807,GO:0008150,GO:0008152,GO:0009507,GO:0009536,GO:0009987,GO:0010467,GO:0016070,GO:0016071,GO:0031425,GO:0031426,GO:0034641,GO:0043170,GO:0043226,GO:0043227,GO:0043229,GO:0043231,GO:0044237,GO:0044238,GO:0044260,GO:0044424,GO:0044444,GO:0044464,GO:0046483,GO:0071704,GO:0090304,GO:1901360		S	Pentatricopeptide repeat-containing protein At3g46790
MSTRG.26460	MR_inoculated	MS_control	-2.58356	4.4757	0.000314671	0.0042544	Down	Yes	XP_014520324.1		3847.GLYMA20G00980.1		GO:0005575,GO:0016020	K00512	Q	cytochrome P450
MSTRG.25514	MR_inoculated	MS_control	2.58168	4.47509	0.000314671	0.0042544	Up	Yes	XP_014520556.2		3847.GLYMA01G39710.1
MSTRG.23694	MR_inoculated	MS_control	2.49532	7.50468	0.000315262	0.00425663	Up	Yes	XP_014518289.1		3847.GLYMA15G10210.1	RPS14	GO:0005575,GO:0005622,GO:0005623,GO:0005634,GO:0005730,GO:0005737,GO:0005773,GO:0005774,GO:0005829,GO:0005840,GO:0005886,GO:0005911,GO:0009506,GO:0009507,GO:0009536,GO:0015935,GO:0016020,GO:0022626,GO:0022627,GO:0030054,GO:0030529,GO:0031090,GO:0031974,GO:0031981,GO:0032991,GO:0043226,GO:0043227,GO:0043228,GO:0043229,GO:0043231,GO:0043232,GO:0043233,GO:0044391,GO:0044422,GO:0044424,GO:0044428,GO:…	K02955	J	ribosomal protein
MSTRG.8906	MR_inoculated	MS_control	2.49176	7.97541	0.000315453	0.00425663	Up	Yes	XP_014500483.1		3847.GLYMA04G08730.1		GO:0005575,GO:0005622,GO:0005623,GO:0005737,GO:0005829,GO:0005886,GO:0006950,GO:0006952,GO:0008150,GO:0009607,GO:0009617,GO:0009620,GO:0016020,GO:0042742,GO:0044424,GO:0044444,GO:0044464,GO:0050832,GO:0050896,GO:0051704,GO:0051707,GO:0071944		S	Dabb
MSTRG.15028	MR_inoculated	MS_control	2.5569	4.87649	0.000315567	0.00425663	Up	Yes	XP_014505643.1		3847.GLYMA05G18410.1				S	transferase, family
MSTRG.15713	MR_inoculated	MS_control	2.57171	4.61491	0.000315776	0.00425663	Up	Yes	XP_014508499.1		3694.POPTR_0004s02970.1		GO:0003674,GO:0003824,GO:0005575,GO:0005622,GO:0005623,GO:0005737,GO:0006629,GO:0006720,GO:0008150,GO:0008152,GO:0008299,GO:0008610,GO:0009058,GO:0009507,GO:0009536,GO:0009987,GO:0016829,GO:0016835,GO:0016838,GO:0034007,GO:0042214,GO:0043226,GO:0043227,GO:0043229,GO:0043231,GO:0043692,GO:0043693,GO:0044237,GO:0044238,GO:0044249,GO:0044255,GO:0044424,GO:0044444,GO:0044464,GO:0044710,GO:0046246,GO:…	K15086	S	synthase
MSTRG.2676	MR_inoculated	MS_control	2.61063	4.08954	0.000317371	0.00427412	Up	Yes	XP_014522753.1		3847.GLYMA09G35883.1				G	inactive purple acid phosphatase 27-like
MSTRG.10841	MR_inoculated	MS_control	2.95169	2.31317	0.000317781	0.00427412	Up	Yes	XP_014500541.1		3847.GLYMA12G31890.2	OSI_32649			T	Mitogen-activated protein kinase kinase kinase
MSTRG.16459	MR_inoculated	MS_control	2.95169	2.31317	0.000317781	0.00427412	Up	Yes	XP_014506138.1		3847.GLYMA13G22241.1				S	Pentatricopeptide repeat-containing protein
MSTRG.14655	MR_inoculated	MS_control	2.60486	4.14275	0.000318842	0.0042852	Up	Yes
MSTRG.5227	MR_inoculated	MS_control	2.74213	3.09788	0.000320272	0.00430054	Up	Yes	XP_014496019.1		3847.GLYMA03G35190.2		GO:0003674,GO:0003824,GO:0003993,GO:0005575,GO:0005576,GO:0006793,GO:0006796,GO:0008150,GO:0008152,GO:0009987,GO:0016311,GO:0016787,GO:0016788,GO:0016791,GO:0042578,GO:0044237		G	Purple acid phosphatase
MSTRG.15179	MR_inoculated	MS_control	2.51645	5.87769	0.000320458	0.00430054	Up	Yes	XP_014508918.1		3847.GLYMA05G23860.2		GO:0005575,GO:0005622,GO:0005623,GO:0005737,GO:0009507,GO:0009536,GO:0043226,GO:0043227,GO:0043229,GO:0043231,GO:0044424,GO:0044444,GO:0044464		S	Pentatricopeptide repeat-containing protein
MSTRG.10404	MR_inoculated	MS_control	2.48558	8.26199	0.000321029	0.00430194	Up	Yes
MSTRG.5648	MR_inoculated	MS_control	2.58555	4.36227	0.000321037	0.00430194	Up	Yes	XP_014495846.1		3847.GLYMA18G04770.1		GO:0008150,GO:0009719,GO:0010033,GO:0010200,GO:0010243,GO:0042221,GO:0050896,GO:1901698,GO:1901700		O	U-box domain-containing protein
MSTRG.7785	MR_inoculated	MS_control	2.54617	4.99475	0.000322977	0.00432474	Up	Yes
MSTRG.8621	MR_inoculated	MS_control	2.56808	4.59154	0.000323517	0.00432877	Up	Yes	XP_014499740.1		3847.GLYMA06G11790.1		GO:0003333,GO:0003674,GO:0005215,GO:0005342,GO:0005575,GO:0005623,GO:0005886,GO:0006810,GO:0006811,GO:0006820,GO:0006865,GO:0008150,GO:0008509,GO:0008514,GO:0009987,GO:0015075,GO:0015171,GO:0015179,GO:0015562,GO:0015711,GO:0015807,GO:0015849,GO:0016020,GO:0022857,GO:0022891,GO:0022892,GO:0032973,GO:0034220,GO:0034639,GO:0042592,GO:0043090,GO:0044464,GO:0044699,GO:0044763,GO:0044765,GO:0046942,GO:…		S	auxin-induced protein
MSTRG.25815	MR_inoculated	MS_control	-2.57618	4.49157	0.00032413	0.00433378	Down	Yes	XP_022631286.1		3847.GLYMA11G08275.1		GO:0005575,GO:0016020	K08472	D	May be involved in modulation of pathogen defense and leaf cell death (By similarity)
MSTRG.16816	MR_inoculated	MS_control	-2.59661	4.21776	0.000324455	0.00433492	Down	Yes	XP_014507773.2		3847.GLYMA13G17561.1		GO:0005575,GO:0005618,GO:0005623,GO:0030312,GO:0044464,GO:0071944		G	pectinesterase
MSTRG.9566	MR_inoculated	MS_control	2.64511	3.7102	0.000325274	0.00434266	Up	Yes	XP_014500091.1		3847.GLYMA06G02900.1				S	glyoxal oxidase-related
MSTRG.16424	MR_inoculated	MS_control	-2.98527	2.21005	0.000325979	0.00434886	Down	Yes	XP_022638521.1		3847.GLYMA17G04350.1				Q	Plant PDR ABC transporter associated
MSTRG.3327	MR_inoculated	MS_control	2.7492	3.03864	0.000326347	0.00435057	Up	Yes	XP_022642954.1		3847.GLYMA11G15713.1
MSTRG.748	MR_inoculated	MS_control	-2.48496	7.81288	0.000329986	0.00439584	Down	Yes	XP_014515672.1		3847.GLYMA09G31980.1	HCF101	GO:0005575,GO:0005622,GO:0005623,GO:0005737,GO:0008150,GO:0008152,GO:0009058,GO:0009507,GO:0009532,GO:0009536,GO:0009570,GO:0016043,GO:0016226,GO:0022607,GO:0031163,GO:0043226,GO:0043227,GO:0043229,GO:0043231,GO:0044085,GO:0044422,GO:0044424,GO:0044434,GO:0044435,GO:0044444,GO:0044446,GO:0044464,GO:0071840		D	Protein mrp homolog
MSTRG.13841	MR_inoculated	MS_control	2.50497	6.07906	0.000331177	0.00440848	Up	Yes	XP_014505814.1		3847.GLYMA16G17680.1				S	Isoflavone reductase
MSTRG.14219	MR_inoculated	MS_control	-2.83863	2.64416	0.000332315	0.0044184	Down	Yes	XP_022638818.1		59689.Al_scaffold_0001_584	FTSH2	GO:0003674,GO:0003824,GO:0004176,GO:0005575,GO:0005622,GO:0005623,GO:0005737,GO:0006139,GO:0006152,GO:0006163,GO:0006195,GO:0006200,GO:0006725,GO:0006753,GO:0006793,GO:0006796,GO:0006807,GO:0008150,GO:0008152,GO:0008233,GO:0009056,GO:0009057,GO:0009116,GO:0009117,GO:0009119,GO:0009123,GO:0009125,GO:0009126,GO:0009128,GO:0009141,GO:0009143,GO:0009144,GO:0009146,GO:0009150,GO:0009154,GO:0009158,GO:…	K03798	L	ATP-dependent peptidase ATPase metallopeptidase zinc ion binding
MSTRG.1356	MR_inoculated	MS_control	2.51063	5.81477	0.00033241	0.0044184	Up	Yes	XP_022640848.1		3847.GLYMA13G07130.1	OSI_23796	GO:0000162,GO:0003674,GO:0003824,GO:0005488,GO:0005515,GO:0006082,GO:0006520,GO:0006568,GO:0006576,GO:0006586,GO:0006725,GO:0006807,GO:0008150,GO:0008152,GO:0008652,GO:0009058,GO:0009072,GO:0009073,GO:0009308,GO:0009309,GO:0009987,GO:0016053,GO:0016829,GO:0016835,GO:0016836,GO:0018130,GO:0019438,GO:0019752,GO:0034641,GO:0042401,GO:0042430,GO:0042435,GO:0042802,GO:0042803,GO:0043436,GO:0044106,GO:…	K06001	E	tryptophan synthase, beta chain
MSTRG.12955	MR_inoculated	MS_control	2.63872	3.70477	0.000335709	0.00445898	Up	Yes	XP_022637437.1		3847.GLYMA14G14270.1		GO:0003674,GO:0003824,GO:0003999,GO:0005215,GO:0005575,GO:0005622,GO:0005623,GO:0005737,GO:0005794,GO:0005829,GO:0005886,GO:0006139,GO:0006144,GO:0006168,GO:0006725,GO:0006807,GO:0006810,GO:0006811,GO:0006817,GO:0006820,GO:0008150,GO:0008152,GO:0008509,GO:0009058,GO:0009112,GO:0009113,GO:0009987,GO:0015075,GO:0015103,GO:0015114,GO:0015698,GO:0016020,GO:0016740,GO:0016757,GO:0016763,GO:0018130,GO:…	K00759	F	adenine phosphoribosyltransferase
MSTRG.13034	MR_inoculated	MS_control	2.58134	4.28427	0.000336688	0.00446871	Up	Yes	XP_014504068.1		3847.GLYMA17G33760.1
MSTRG.9716	MR_inoculated	MS_control	-2.55059	4.76666	0.000337602	0.00447756	Down	Yes	XP_022636764.1		3847.GLYMA06G02030.2	OSI_32291	GO:0001071,GO:0003674,GO:0003700,GO:0005575,GO:0005622,GO:0005623,GO:0005634,GO:0006355,GO:0008150,GO:0009889,GO:0010468,GO:0010556,GO:0019219,GO:0019222,GO:0031323,GO:0031326,GO:0043226,GO:0043227,GO:0043229,GO:0043231,GO:0044424,GO:0044464,GO:0050789,GO:0050794,GO:0051171,GO:0051252,GO:0060255,GO:0065007,GO:0080090,GO:2000112,GO:2001141		K	RWP-RK domain-containing protein
MSTRG.11423	MR_inoculated	MS_control	-2.49208	6.60536	0.000338086	0.00448069	Down	Yes	XP_014504986.1		3847.GLYMA14G04080.1				S	F-Box protein
MSTRG.15650	MR_inoculated	MS_control	2.69365	3.29156	0.000340336	0.00450483	Up	Yes	XP_014507184.1		3847.GLYMA17G10130.1	DEL1	GO:0001071,GO:0003674,GO:0003676,GO:0003677,GO:0003700,GO:0005488,GO:0005575,GO:0005622,GO:0005623,GO:0005634,GO:0006139,GO:0006259,GO:0006260,GO:0006261,GO:0006275,GO:0006355,GO:0006725,GO:0006807,GO:0007049,GO:0008150,GO:0008152,GO:0008156,GO:0009058,GO:0009059,GO:0009889,GO:0009890,GO:0009892,GO:0009987,GO:0010468,GO:0010556,GO:0010558,GO:0010564,GO:0010605,GO:0010948,GO:0019219,GO:0019222,GO:…	K09391	K	E2F transcription factor-like E2FE-like
MSTRG.5546	MR_inoculated	MS_control	-2.54799	4.78223	0.000340405	0.00450483	Down	Yes	XP_014494736.1		3847.GLYMA19G40890.1		GO:0000325,GO:0005575,GO:0005622,GO:0005623,GO:0005737,GO:0005773,GO:0005774,GO:0009705,GO:0016020,GO:0031090,GO:0043226,GO:0043227,GO:0043229,GO:0043231,GO:0044422,GO:0044424,GO:0044437,GO:0044444,GO:0044446,GO:0044464	K05389	P	Potassium channel
MSTRG.31449	MR_inoculated	MS_control	-2.48912	6.62204	0.000342676	0.00453158	Down	Yes	XP_014491239.1		3847.GLYMA19G29870.1			K03327	V	protein TRANSPARENT TESTA 12-like
MSTRG.15177	MR_inoculated	MS_control	2.93484	2.29882	0.000344458	0.0045485	Up	Yes	XP_014510010.1		3847.GLYMA05G23840.1		GO:0001071,GO:0003674,GO:0003700,GO:0006355,GO:0008150,GO:0009889,GO:0010468,GO:0010556,GO:0019219,GO:0019222,GO:0031323,GO:0031326,GO:0050789,GO:0050794,GO:0051171,GO:0051252,GO:0060255,GO:0065007,GO:0080090,GO:2000112,GO:2001141		S	NAC domain containing protein
MSTRG.26810	MR_inoculated	MS_control	2.93484	2.29882	0.000344458	0.0045485	Up	Yes	XP_014521583.1		3847.GLYMA07G05190.1		GO:0005575,GO:0016020		O	RING-H2 finger protein
MSTRG.16635	MR_inoculated	MS_control	-2.48574	6.68896	0.000346828	0.00457646	Down	Yes	XP_014507233.1		3847.GLYMA13G00820.1				S	Protein of unknown function (DUF1517)
MSTRG.10947	MR_inoculated	MS_control	-2.51139	5.54579	0.000347353	0.00458005	Down	Yes	XP_014502393.1		3847.GLYMA13G34750.2				S	Sodium/calcium exchanger protein
MSTRG.11097	MR_inoculated	MS_control	-2.54651	4.72698	0.000347884	0.00458199	Down	Yes	XP_022637486.1		3847.GLYMA14G01080.2				S	Pentatricopeptide repeat-containing protein
MSTRG.3154	MR_inoculated	MS_control	2.46766	8.89613	0.000348006	0.00458199	Up	Yes	XP_014493968.1		3847.GLYMA11G13880.2		GO:0003674,GO:0003824,GO:0005575,GO:0005622,GO:0005623,GO:0005737,GO:0006082,GO:0006629,GO:0006950,GO:0008150,GO:0008152,GO:0009058,GO:0009507,GO:0009526,GO:0009532,GO:0009534,GO:0009535,GO:0009536,GO:0009570,GO:0009579,GO:0009607,GO:0009611,GO:0009617,GO:0009620,GO:0009694,GO:0009695,GO:0009719,GO:0009725,GO:0009753,GO:0009941,GO:0009987,GO:0010033,GO:0016020,GO:0016053,GO:0016165,GO:0016166,GO:…	K00454	E	Plant lipoxygenase may be involved in a number of diverse aspects of plant physiology including growth and development, pest resistance, and senescence or responses to wounding (By similarity)
MSTRG.3073	MR_inoculated	MS_control	-2.60418	3.95929	0.000349119	0.00459331	Down	Yes	XP_014493324.1		3847.GLYMA11G13020.1		GO:0005575,GO:0005623,GO:0005886,GO:0016020,GO:0044464,GO:0071944		S	CASP-like protein
MSTRG.29819	MR_inoculated	MS_control	2.59635	4.01686	0.0003496	0.0045963	Up	Yes	XP_014524429.1		3847.GLYMA08G15650.1		GO:0005575,GO:0005618,GO:0005623,GO:0005886,GO:0016020,GO:0030312,GO:0044464,GO:0071944	K01051	G	pectinesterase
MSTRG.17111	MR_inoculated	MS_control	-2.64545	3.58624	0.000351081	0.00461242	Down	Yes	XP_014507079.1		3847.GLYMA17G02270.1				C, G	UDP-Glycosyltransferase
MSTRG.19209	MR_inoculated	MS_control	2.50518	5.59153	0.000352227	0.00462413	Up	Yes	XP_014512191.1		3847.GLYMA13G19390.1			K11153	Q	Dehydrogenase
MSTRG.32696	MR_inoculated	MS_control	-2.54133	4.75881	0.000353523	0.00463778	Down	Yes	XP_014492383.1		3847.GLYMA10G27980.10	OSI_14203		K07025,K18551	S	Haloacid dehalogenase-like hydrolase family protein
MSTRG.10946	MR_inoculated	MS_control	2.82335	2.63223	0.000354528	0.00464759	Up	Yes	XP_022637326.1		3847.GLYMA13G34731.1				S	Sodium/calcium exchanger protein
MSTRG.7542	MR_inoculated	MS_control	-2.50722	5.53204	0.000355221	0.0046499	Down	Yes	XP_014497761.1		3847.GLYMA02G09790.2				T	LisH domain and HEAT repeat-containing protein KIAA1468 homolog
MSTRG.21281	MR_inoculated	MS_control	2.56509	4.34491	0.000355381	0.0046499	Up	Yes	XP_022641547.1		3847.GLYMA20G38470.2			K01054	I	monoglyceride
MSTRG.6872	MR_inoculated	MS_control	-2.49505	5.96045	0.000355694	0.0046499	Down	Yes	XP_022635605.1		3847.GLYMA18G46050.5			K13459	T	resistance protein
MSTRG.33484	MR_inoculated	MS_control	2.6701	3.37603	0.00035573	0.0046499	Up	Yes	XP_014493197.1		3847.GLYMA03G03520.1	CYP83B1	GO:0000162,GO:0002376,GO:0003674,GO:0003824,GO:0004497,GO:0005575,GO:0005622,GO:0005623,GO:0005737,GO:0005739,GO:0005783,GO:0005886,GO:0006082,GO:0006520,GO:0006568,GO:0006576,GO:0006586,GO:0006725,GO:0006790,GO:0006807,GO:0006950,GO:0006952,GO:0006955,GO:0007275,GO:0008150,GO:0008152,GO:0008652,GO:0009058,GO:0009072,GO:0009073,GO:0009308,GO:0009309,GO:0009314,GO:0009416,GO:0009607,GO:0009617,GO:…	K11818	Q	cytochrome P450
MSTRG.21606	MR_inoculated	MS_control	2.50228	5.59888	0.000356848	0.00466115	Up	Yes	XP_022642047.1		3847.GLYMA08G21440.1			K14376	A	poly(A) polymerase-like
MSTRG.11154	MR_inoculated	MS_control	2.48539	6.265	0.000357868	0.00466916	Up	Yes	XP_014504364.1		3847.GLYMA02G46970.1			K08065	K	Nuclear transcription factor Y subunit
MSTRG.23303	MR_inoculated	MS_control	2.61753	3.76345	0.000357976	0.00466916	Up	Yes	XP_014519089.1		3847.GLYMA18G09120.2			K10400	Z	Kinesin motor domain domain containing protein, expressed
[truncated: 1,214 more rows]
